# Supplementary material for: Automatic validation of computational models using pseudo-3D spatio-temporal model checking
Source: PubMed Central journal article supplement (PMC4272535; doi:10.1186/s12918-014-0124-0), 2014-12-02
Supplement: 12918_2014_124_MOESM7_ESM.pdf [file 12918_2014_124_MOESM7_ESM.pdf]

## Model checking results for the phase variation case study

For the convenience of the reader the set of PBLSTL statements considered for the phase variation case study will be restated below:

$$P \geq 0.95 [G [0, 100] (d(count(regions)) \geq 0)]. \quad (1)$$

$$P < 0.05 [F [0, 100] ((count(regions) > 0) \wedge (min(regions, clusteredness) < 0.9))]. \quad (2)$$

$$P > 0.95 [(F [0, 100] (G [0, 100] ((count(regions) > 0) \wedge (avg(regions, density) > 0.5)))) \vee (G [0, 100] (count(regions) = 0))]. \quad (3)$$

$$P > 0.5 [(F [0, 100] ((count(regions) > 0) \wedge (d(avg(regions, area)) > 0) \wedge F [0, 100] ((d(avg(regions, area)) < 0)))) \vee (F [0, 100] ((d(avg(regions, area)) < 0) \wedge F [0, 100] ((count(regions) > 0) \wedge (d(avg(regions, area)) > 0)))) \vee (G [0, 100] (count(regions) = 0))] \quad (4)$$

$$\begin{aligned}
P > 0.6 & [(F [0, 100] ((count(regions) > 0) \wedge \\
& (d(avg(regions, perimeter)) > 0) \wedge \\
& F [0, 100] ((d(avg(regions, perimeter)) < 0) \wedge \\
& F [0, 100] ((count(regions) > 0) \wedge \\
& (d(avg(regions, perimeter)) > 0) \wedge \\
& F [0, 100] ((d(avg(regions, perimeter)) < 0) \wedge \\
& F [0, 100] ((count(regions) > 0) \wedge \\
& (d(avg(regions, perimeter)) > 0) \wedge \\
& F [0, 100] ((d(avg(regions, perimeter)) < 0)))))) \vee \\
& (F [0, 100] ((d(avg(regions, perimeter)) < 0) \wedge \\
& F [0, 100] ((count(regions) > 0) \wedge \\
& (d(avg(regions, perimeter)) > 0) \wedge \\
& F [0, 100] ((d(avg(regions, perimeter)) < 0) \wedge \\
& F [0, 100] ((count(regions) > 0) \wedge \\
& (d(avg(regions, perimeter)) > 0)))))) \vee \\
& (G [0, 100] (count(regions) = 0))]. \tag{5}
\end{aligned}$$

$$\begin{aligned}
P < 0.1 & [F [0, 100] ((count(regions) > 0) \wedge \\
& (max(regions, angle) > 120))]. \tag{6}
\end{aligned}$$

$$\begin{aligned}
P \geq 0.95 & [(F [0, 100] (G [0, 100] ((count(regions) > 0) \wedge \\
& (min(regions, distanceFromOrigin) > 100)))) \vee \\
& (G [0, 100] (count(regions) = 0))]. \tag{7}
\end{aligned}$$

$$\begin{aligned}
P > 0.8 & [(F [0, 100] (G [0, 100] ((count(regions) > 0) \wedge \\
& (min(regions, triangleMeasure) > \\
& max(regions, rectangleMeasure)) \wedge \\
& (min(regions, triangleMeasure) > \\
& max(regions, circleMeasure)))) \vee \\
& (G [0, 100] (count(regions) = 0))]. \tag{8}
\end{aligned}$$

Each table describes the results corresponding to one of the PBLSTL statements. The first column of each row represents the identifier of the model checking execution. The second column represents the evaluation result (T = true, F

= false) of the PBLSTL statement for that particular model checker execution. The number of STML files against which the PBLSTL statement was executed, respectively how many of them evaluated true and how many evaluated false is provided in columns three, four and five. Finally column six presents the execution time (minutes:seconds format) corresponding to each model checker run. All executions of the model checker employed the frequentist statistical model checking approach with both probability of type I and type II errors equal to 5%. No extra evaluation program was provided and the extra evaluation time was set to zero. Therefore in case the available number of simulations did not suffice the answer was provided using the probabilistic black-box model checking approach.

Table 1: Model checking results corresponding to logic property 1

| <b>Id</b> | <b>Result</b> | <b>#total</b> | <b>#true</b> | <b>#false</b> | <b>Execution time (min:sec)</b> |
|-----------|---------------|---------------|--------------|---------------|---------------------------------|
| 1         | T             | 58            | 58           | 0             | 0:02.42                         |
| 2         | T             | 69            | 68           | 1             | 0:02.94                         |
| 3         | T             | 69            | 68           | 1             | 0:02.89                         |
| 4         | T             | 69            | 68           | 1             | 0:02.85                         |
| 5         | T             | 69            | 68           | 1             | 0:02.87                         |
| 6         | T             | 69            | 68           | 1             | 0:02.89                         |
| 7         | T             | 58            | 58           | 0             | 0:02.46                         |
| 8         | T             | 69            | 68           | 1             | 0:02.89                         |
| 9         | T             | 83            | 81           | 2             | 0:03.49                         |
| 10        | T             | 69            | 68           | 1             | 0:02.84                         |
| 11        | T             | 58            | 58           | 0             | 0:02.45                         |
| 12        | T             | 83            | 81           | 2             | 0:03.47                         |
| 13        | T             | 69            | 68           | 1             | 0:02.85                         |
| 14        | T             | 69            | 68           | 1             | 0:02.90                         |
| 15        | T             | 58            | 58           | 0             | 0:03.12                         |
| 16        | T             | 96            | 93           | 3             | 0:04.26                         |
| 17        | T             | 96            | 93           | 3             | 0:04.52                         |
| 18        | T             | 58            | 58           | 0             | 0:02.36                         |
| 19        | T             | 58            | 58           | 0             | 0:02.43                         |
| 20        | T             | 58            | 58           | 0             | 0:02.40                         |
| 21        | T             | 58            | 58           | 0             | 0:02.44                         |
| 22        | T             | 69            | 68           | 1             | 0:02.92                         |
| 23        | T             | 58            | 58           | 0             | 0:02.38                         |
| 24        | T             | 69            | 68           | 1             | 0:02.85                         |
| 25        | T             | 58            | 58           | 0             | 0:02.42                         |
| 26        | T             | 58            | 58           | 0             | 0:02.42                         |
| 27        | T             | 83            | 81           | 2             | 0:03.40                         |
| 28        | T             | 69            | 68           | 1             | 0:02.86                         |
| 29        | T             | 69            | 68           | 1             | 0:02.85                         |
| 30        | T             | 83            | 81           | 2             | 0:03.49                         |
| 31        | T             | 69            | 68           | 1             | 0:02.89                         |
| 32        | T             | 69            | 68           | 1             | 0:02.93                         |
| 33        | T             | 58            | 58           | 0             | 0:02.41                         |
| 34        | T             | 69            | 68           | 1             | 0:02.90                         |

| <b>Id</b> | <b>Result</b> | <b>#total</b> | <b>#true</b> | <b>#false</b> | <b>Execution time (min:sec)</b> |
|-----------|---------------|---------------|--------------|---------------|---------------------------------|
| 35        | T             | 69            | 68           | 1             | 0:02.91                         |
| 36        | T             | 83            | 81           | 2             | 0:04.11                         |
| 37        | T             | 83            | 81           | 2             | 0:03.50                         |
| 38        | T             | 110           | 106          | 4             | 0:04.53                         |
| 39        | T             | 58            | 58           | 0             | 0:02.41                         |
| 40        | T             | 69            | 68           | 1             | 0:02.88                         |
| 41        | T             | 83            | 81           | 2             | 0:03.45                         |
| 42        | T             | 58            | 58           | 0             | 0:02.47                         |
| 43        | T             | 58            | 58           | 0             | 0:02.44                         |
| 44        | T             | 58            | 58           | 0             | 0:02.47                         |
| 45        | T             | 58            | 58           | 0             | 0:02.44                         |
| 46        | T             | 58            | 58           | 0             | 0:02.46                         |
| 47        | T             | 69            | 68           | 1             | 0:02.89                         |
| 48        | T             | 58            | 58           | 0             | 0:02.41                         |
| 49        | T             | 58            | 58           | 0             | 0:02.42                         |
| 50        | T             | 58            | 58           | 0             | 0:02.42                         |
| 51        | T             | 96            | 93           | 3             | 0:03.95                         |
| 52        | T             | 58            | 58           | 0             | 0:02.41                         |
| 53        | T             | 58            | 58           | 0             | 0:02.38                         |
| 54        | T             | 58            | 58           | 0             | 0:02.45                         |
| 55        | T             | 58            | 58           | 0             | 0:02.40                         |
| 56        | T             | 83            | 81           | 2             | 0:03.46                         |
| 57        | T             | 69            | 68           | 1             | 0:02.86                         |
| 58        | T             | 69            | 68           | 1             | 0:02.83                         |
| 59        | T             | 58            | 58           | 0             | 0:02.46                         |
| 60        | T             | 69            | 68           | 1             | 0:02.85                         |
| 61        | T             | 83            | 81           | 2             | 0:03.39                         |
| 62        | T             | 58            | 58           | 0             | 0:02.40                         |
| 63        | T             | 58            | 58           | 0             | 0:02.41                         |
| 64        | T             | 58            | 58           | 0             | 0:02.43                         |
| 65        | T             | 58            | 58           | 0             | 0:02.40                         |
| 66        | T             | 58            | 58           | 0             | 0:02.45                         |
| 67        | T             | 58            | 58           | 0             | 0:03.34                         |
| 68        | T             | 83            | 81           | 2             | 0:03.43                         |
| 69        | T             | 83            | 81           | 2             | 0:03.41                         |
| 70        | T             | 58            | 58           | 0             | 0:02.43                         |
| 71        | T             | 58            | 58           | 0             | 0:02.44                         |
| 72        | T             | 69            | 68           | 1             | 0:02.92                         |
| 73        | T             | 58            | 58           | 0             | 0:02.46                         |
| 74        | T             | 96            | 93           | 3             | 0:03.94                         |
| 75        | T             | 83            | 81           | 2             | 0:03.45                         |
| 76        | T             | 58            | 58           | 0             | 0:02.50                         |
| 77        | T             | 69            | 68           | 1             | 0:02.86                         |
| 78        | T             | 69            | 68           | 1             | 0:02.85                         |
| 79        | T             | 69            | 68           | 1             | 0:02.95                         |
| 80        | T             | 69            | 68           | 1             | 0:02.85                         |
| 81        | T             | 58            | 58           | 0             | 0:02.42                         |
| 82        | T             | 58            | 58           | 0             | 0:02.39                         |

| <b>Id</b> | <b>Result</b> | <b>#total</b> | <b>#true</b> | <b>#false</b> | <b>Execution time (min:sec)</b> |
|-----------|---------------|---------------|--------------|---------------|---------------------------------|
| 83        | T             | 69            | 68           | 1             | 0:02.89                         |
| 84        | T             | 58            | 58           | 0             | 0:02.44                         |
| 85        | T             | 58            | 58           | 0             | 0:02.38                         |
| 86        | T             | 83            | 81           | 2             | 0:03.49                         |
| 87        | T             | 58            | 58           | 0             | 0:02.44                         |
| 88        | T             | 69            | 68           | 1             | 0:02.90                         |
| 89        | T             | 58            | 58           | 0             | 0:02.40                         |
| 90        | T             | 69            | 68           | 1             | 0:02.83                         |
| 91        | T             | 83            | 81           | 2             | 0:03.40                         |
| 92        | T             | 69            | 68           | 1             | 0:02.88                         |
| 93        | T             | 58            | 58           | 0             | 0:02.42                         |
| 94        | T             | 69            | 68           | 1             | 0:02.88                         |
| 95        | T             | 69            | 68           | 1             | 0:02.81                         |
| 96        | T             | 69            | 68           | 1             | 0:02.83                         |
| 97        | T             | 58            | 58           | 0             | 0:02.42                         |
| 98        | T             | 58            | 58           | 0             | 0:02.46                         |
| 99        | T             | 58            | 58           | 0             | 0:02.40                         |
| 100       | T             | 69            | 68           | 1             | 0:02.92                         |
| 101       | T             | 58            | 58           | 0             | 0:02.45                         |
| 102       | T             | 83            | 81           | 2             | 0:03.50                         |
| 103       | T             | 58            | 58           | 0             | 0:02.42                         |
| 104       | T             | 58            | 58           | 0             | 0:02.43                         |
| 105       | T             | 69            | 68           | 1             | 0:02.85                         |
| 106       | T             | 83            | 81           | 2             | 0:03.41                         |
| 107       | T             | 83            | 81           | 2             | 0:03.46                         |
| 108       | T             | 58            | 58           | 0             | 0:02.40                         |
| 109       | T             | 58            | 58           | 0             | 0:02.40                         |
| 110       | T             | 58            | 58           | 0             | 0:02.47                         |
| 111       | T             | 58            | 58           | 0             | 0:02.43                         |
| 112       | T             | 58            | 58           | 0             | 0:02.41                         |
| 113       | T             | 83            | 81           | 2             | 0:03.48                         |
| 114       | T             | 69            | 68           | 1             | 0:02.89                         |
| 115       | T             | 83            | 81           | 2             | 0:03.44                         |
| 116       | T             | 83            | 81           | 2             | 0:03.42                         |
| 117       | T             | 58            | 58           | 0             | 0:02.46                         |
| 118       | T             | 83            | 81           | 2             | 0:04.94                         |
| 119       | T             | 96            | 93           | 3             | 0:03.98                         |
| 120       | T             | 58            | 58           | 0             | 0:02.44                         |
| 121       | T             | 69            | 68           | 1             | 0:02.91                         |
| 122       | T             | 69            | 68           | 1             | 0:02.92                         |
| 123       | T             | 58            | 58           | 0             | 0:02.45                         |
| 124       | T             | 69            | 68           | 1             | 0:03.54                         |
| 125       | T             | 69            | 68           | 1             | 0:02.87                         |
| 126       | T             | 58            | 58           | 0             | 0:02.47                         |
| 127       | T             | 69            | 68           | 1             | 0:02.85                         |
| 128       | T             | 69            | 68           | 1             | 0:02.92                         |
| 129       | T             | 58            | 58           | 0             | 0:02.42                         |
| 130       | T             | 58            | 58           | 0             | 0:02.42                         |

| <b>Id</b> | <b>Result</b> | <b>#total</b> | <b>#true</b> | <b>#false</b> | <b>Execution time (min:sec)</b> |
|-----------|---------------|---------------|--------------|---------------|---------------------------------|
| 131       | T             | 58            | 58           | 0             | 0:02.39                         |
| 132       | T             | 58            | 58           | 0             | 0:02.42                         |
| 133       | T             | 58            | 58           | 0             | 0:02.45                         |
| 134       | T             | 69            | 68           | 1             | 0:03.55                         |
| 135       | T             | 58            | 58           | 0             | 0:02.45                         |
| 136       | T             | 69            | 68           | 1             | 0:02.91                         |
| 137       | T             | 69            | 68           | 1             | 0:02.92                         |
| 138       | T             | 69            | 68           | 1             | 0:02.47                         |
| 139       | T             | 69            | 68           | 1             | 0:02.90                         |
| 140       | T             | 58            | 58           | 0             | 0:02.43                         |
| 141       | T             | 58            | 58           | 0             | 0:02.43                         |
| 142       | T             | 69            | 68           | 1             | 0:02.84                         |
| 143       | T             | 58            | 58           | 0             | 0:02.43                         |
| 144       | T             | 58            | 58           | 0             | 0:02.42                         |
| 145       | T             | 58            | 58           | 0             | 0:02.73                         |
| 146       | T             | 83            | 81           | 2             | 0:03.42                         |
| 147       | T             | 96            | 93           | 3             | 0:04.04                         |
| 148       | T             | 69            | 68           | 1             | 0:03.03                         |
| 149       | T             | 58            | 58           | 0             | 0:02.44                         |
| 150       | T             | 110           | 106          | 4             | 0:04.55                         |
| 151       | T             | 69            | 68           | 1             | 0:02.82                         |
| 152       | T             | 58            | 58           | 0             | 0:02.41                         |
| 153       | T             | 58            | 58           | 0             | 0:02.47                         |
| 154       | T             | 58            | 58           | 0             | 0:03.42                         |
| 155       | T             | 69            | 68           | 1             | 0:02.88                         |
| 156       | T             | 58            | 58           | 0             | 0:02.42                         |
| 157       | T             | 69            | 68           | 1             | 0:02.85                         |
| 158       | T             | 83            | 81           | 2             | 0:03.40                         |
| 159       | T             | 58            | 58           | 0             | 0:02.40                         |
| 160       | T             | 83            | 81           | 2             | 0:03.41                         |
| 161       | T             | 58            | 58           | 0             | 0:02.42                         |
| 162       | T             | 58            | 58           | 0             | 0:02.46                         |
| 163       | T             | 58            | 58           | 0             | 0:02.41                         |
| 164       | T             | 69            | 68           | 1             | 0:02.86                         |
| 165       | T             | 69            | 68           | 1             | 0:02.87                         |
| 166       | T             | 83            | 81           | 2             | 0:03.41                         |
| 167       | T             | 58            | 58           | 0             | 0:02.43                         |
| 168       | T             | 69            | 68           | 1             | 0:02.92                         |
| 169       | T             | 58            | 58           | 0             | 0:02.40                         |
| 170       | T             | 58            | 58           | 0             | 0:02.41                         |
| 171       | T             | 96            | 93           | 3             | 0:03.97                         |
| 172       | T             | 110           | 106          | 4             | 0:04.50                         |
| 173       | T             | 58            | 58           | 0             | 0:02.44                         |
| 174       | T             | 83            | 81           | 2             | 0:03.43                         |
| 175       | T             | 96            | 93           | 3             | 0:03.98                         |
| 176       | T             | 96            | 93           | 3             | 0:03.99                         |
| 177       | T             | 58            | 58           | 0             | 0:03.46                         |
| 178       | T             | 69            | 68           | 1             | 0:02.86                         |

| <b>Id</b> | <b>Result</b> | <b>#total</b> | <b>#true</b> | <b>#false</b> | <b>Execution time (min:sec)</b> |
|-----------|---------------|---------------|--------------|---------------|---------------------------------|
| 179       | T             | 69            | 68           | 1             | 0:02.87                         |
| 180       | T             | 69            | 68           | 1             | 0:02.89                         |
| 181       | T             | 58            | 58           | 0             | 0:02.45                         |
| 182       | T             | 58            | 58           | 0             | 0:02.46                         |
| 183       | T             | 83            | 81           | 2             | 0:03.42                         |
| 184       | T             | 58            | 58           | 0             | 0:02.45                         |
| 185       | T             | 96            | 93           | 3             | 0:03.95                         |
| 186       | T             | 58            | 58           | 0             | 0:02.39                         |
| 187       | T             | 110           | 106          | 4             | 0:04.56                         |
| 188       | T             | 58            | 58           | 0             | 0:02.43                         |
| 189       | T             | 69            | 68           | 1             | 0:02.85                         |
| 190       | T             | 58            | 58           | 0             | 0:02.44                         |
| 191       | T             | 96            | 93           | 3             | 0:03.96                         |
| 192       | T             | 69            | 68           | 1             | 0:02.85                         |
| 193       | T             | 58            | 58           | 0             | 0:02.45                         |
| 194       | T             | 83            | 81           | 2             | 0:03.46                         |
| 195       | T             | 83            | 81           | 2             | 0:03.42                         |
| 196       | T             | 69            | 68           | 1             | 0:02.93                         |
| 197       | T             | 83            | 81           | 2             | 0:03.43                         |
| 198       | T             | 58            | 58           | 0             | 0:02.41                         |
| 199       | T             | 58            | 58           | 0             | 0:03.46                         |
| 200       | T             | 96            | 93           | 3             | 0:03.94                         |
| 201       | T             | 69            | 68           | 1             | 0:02.88                         |
| 202       | T             | 58            | 58           | 0             | 0:02.41                         |
| 203       | T             | 58            | 58           | 0             | 0:02.44                         |
| 204       | T             | 69            | 68           | 1             | 0:02.84                         |
| 205       | T             | 58            | 58           | 0             | 0:02.41                         |
| 206       | T             | 83            | 81           | 2             | 0:03.48                         |
| 207       | T             | 58            | 58           | 0             | 0:02.44                         |
| 208       | T             | 58            | 58           | 0             | 0:02.45                         |
| 209       | T             | 58            | 58           | 0             | 0:02.44                         |
| 210       | T             | 58            | 58           | 0             | 0:02.42                         |
| 211       | T             | 69            | 68           | 1             | 0:02.84                         |
| 212       | T             | 58            | 58           | 0             | 0:02.44                         |
| 213       | T             | 58            | 58           | 0             | 0:02.40                         |
| 214       | T             | 58            | 58           | 0             | 0:02.44                         |
| 215       | T             | 58            | 58           | 0             | 0:02.39                         |
| 216       | T             | 58            | 58           | 0             | 0:03.85                         |
| 217       | T             | 58            | 58           | 0             | 0:02.39                         |
| 218       | T             | 58            | 58           | 0             | 0:02.43                         |
| 219       | T             | 58            | 58           | 0             | 0:02.43                         |
| 220       | T             | 69            | 68           | 1             | 0:02.91                         |
| 221       | T             | 96            | 93           | 3             | 0:04.00                         |
| 222       | T             | 58            | 58           | 0             | 0:02.41                         |
| 223       | T             | 58            | 58           | 0             | 0:02.42                         |
| 224       | T             | 69            | 68           | 1             | 0:03.60                         |
| 225       | T             | 69            | 68           | 1             | 0:02.84                         |
| 226       | T             | 83            | 81           | 2             | 0:03.42                         |

| <b>Id</b> | <b>Result</b> | <b>#total</b> | <b>#true</b> | <b>#false</b> | <b>Execution time (min:sec)</b> |
|-----------|---------------|---------------|--------------|---------------|---------------------------------|
| 227       | T             | 83            | 81           | 2             | 0:03.46                         |
| 228       | T             | 69            | 68           | 1             | 0:03.63                         |
| 229       | T             | 58            | 58           | 0             | 0:02.48                         |
| 230       | T             | 58            | 58           | 0             | 0:02.43                         |
| 231       | T             | 58            | 58           | 0             | 0:02.44                         |
| 232       | T             | 83            | 81           | 2             | 0:03.43                         |
| 233       | T             | 69            | 68           | 1             | 0:02.89                         |
| 234       | T             | 69            | 68           | 1             | 0:03.02                         |
| 235       | T             | 83            | 81           | 2             | 0:03.43                         |
| 236       | T             | 58            | 58           | 0             | 0:02.40                         |
| 237       | T             | 83            | 81           | 2             | 0:03.44                         |
| 238       | T             | 58            | 58           | 0             | 0:02.46                         |
| 239       | T             | 83            | 81           | 2             | 0:03.45                         |
| 240       | T             | 69            | 68           | 1             | 0:02.88                         |
| 241       | T             | 110           | 106          | 4             | 0:04.52                         |
| 242       | T             | 58            | 58           | 0             | 0:02.44                         |
| 243       | T             | 69            | 68           | 1             | 0:02.90                         |
| 244       | T             | 69            | 68           | 1             | 0:02.88                         |
| 245       | T             | 69            | 68           | 1             | 0:02.92                         |
| 246       | T             | 96            | 93           | 3             | 0:03.93                         |
| 247       | T             | 69            | 68           | 1             | 0:02.87                         |
| 248       | T             | 58            | 58           | 0             | 0:02.45                         |
| 249       | T             | 69            | 68           | 1             | 0:02.89                         |
| 250       | T             | 69            | 68           | 1             | 0:02.87                         |
| 251       | T             | 69            | 68           | 1             | 0:02.93                         |
| 252       | T             | 69            | 68           | 1             | 0:02.83                         |
| 253       | T             | 83            | 81           | 2             | 0:03.46                         |
| 254       | T             | 69            | 68           | 1             | 0:02.86                         |
| 255       | T             | 58            | 58           | 0             | 0:02.38                         |
| 256       | T             | 58            | 58           | 0             | 0:02.42                         |
| 257       | T             | 58            | 58           | 0             | 0:02.41                         |
| 258       | T             | 58            | 58           | 0             | 0:02.42                         |
| 259       | T             | 69            | 68           | 1             | 0:04.35                         |
| 260       | T             | 69            | 68           | 1             | 0:02.89                         |
| 261       | T             | 83            | 81           | 2             | 0:03.40                         |
| 262       | T             | 69            | 68           | 1             | 0:03.56                         |
| 263       | T             | 69            | 68           | 1             | 0:02.85                         |
| 264       | T             | 58            | 58           | 0             | 0:02.43                         |
| 265       | T             | 58            | 58           | 0             | 0:02.39                         |
| 266       | T             | 58            | 58           | 0             | 0:02.43                         |
| 267       | T             | 58            | 58           | 0             | 0:02.43                         |
| 268       | T             | 58            | 58           | 0             | 0:02.40                         |
| 269       | T             | 58            | 58           | 0             | 0:02.44                         |
| 270       | T             | 83            | 81           | 2             | 0:03.44                         |
| 271       | T             | 69            | 68           | 1             | 0:02.91                         |
| 272       | T             | 83            | 81           | 2             | 0:03.45                         |
| 273       | T             | 58            | 58           | 0             | 0:02.41                         |
| 274       | T             | 58            | 58           | 0             | 0:02.43                         |



| <b>Id</b> | <b>Result</b> | <b>#total</b> | <b>#true</b> | <b>#false</b> | <b>Execution time (min:sec)</b> |
|-----------|---------------|---------------|--------------|---------------|---------------------------------|
| 275       | T             | 58            | 58           | 0             | 0:02.44                         |
| 276       | T             | 69            | 68           | 1             | 0:02.89                         |
| 277       | T             | 69            | 68           | 1             | 0:02.84                         |
| 278       | T             | 69            | 68           | 1             | 0:02.85                         |
| 279       | T             | 58            | 58           | 0             | 0:02.43                         |
| 280       | T             | 69            | 68           | 1             | 0:02.87                         |
| 281       | T             | 69            | 68           | 1             | 0:02.89                         |
| 282       | T             | 69            | 68           | 1             | 0:02.91                         |
| 283       | T             | 58            | 58           | 0             | 0:02.42                         |
| 284       | T             | 69            | 68           | 1             | 0:02.86                         |
| 285       | T             | 69            | 68           | 1             | 0:02.91                         |
| 286       | T             | 69            | 68           | 1             | 0:02.85                         |
| 287       | T             | 58            | 58           | 0             | 0:02.43                         |
| 288       | T             | 69            | 68           | 1             | 0:02.88                         |
| 289       | T             | 83            | 81           | 2             | 0:03.45                         |
| 290       | T             | 58            | 58           | 0             | 0:02.42                         |
| 291       | T             | 69            | 68           | 1             | 0:02.89                         |
| 292       | T             | 69            | 68           | 1             | 0:02.86                         |
| 293       | T             | 58            | 58           | 0             | 0:02.45                         |
| 294       | T             | 83            | 81           | 2             | 0:05.13                         |
| 295       | T             | 58            | 58           | 0             | 0:02.38                         |
| 296       | T             | 69            | 68           | 1             | 0:03.46                         |
| 297       | T             | 69            | 68           | 1             | 0:02.81                         |
| 298       | T             | 58            | 58           | 0             | 0:02.43                         |
| 299       | T             | 58            | 58           | 0             | 0:02.43                         |
| 300       | T             | 83            | 81           | 2             | 0:03.41                         |
| 301       | T             | 69            | 68           | 1             | 0:02.87                         |
| 302       | T             | 69            | 68           | 1             | 0:02.90                         |
| 303       | T             | 124           | 119          | 5             | 0:06.67                         |
| 304       | T             | 69            | 68           | 1             | 0:02.87                         |
| 305       | T             | 58            | 58           | 0             | 0:02.44                         |
| 306       | T             | 58            | 58           | 0             | 0:02.47                         |
| 307       | T             | 96            | 93           | 3             | 0:04.06                         |
| 308       | T             | 58            | 58           | 0             | 0:02.75                         |
| 309       | T             | 69            | 68           | 1             | 0:03.19                         |
| 310       | T             | 69            | 68           | 1             | 0:02.87                         |
| 311       | T             | 83            | 81           | 2             | 0:03.44                         |
| 312       | T             | 69            | 68           | 1             | 0:02.90                         |
| 313       | T             | 58            | 58           | 0             | 0:02.44                         |
| 314       | T             | 69            | 68           | 1             | 0:02.88                         |
| 315       | T             | 58            | 58           | 0             | 0:02.41                         |
| 316       | T             | 69            | 68           | 1             | 0:02.86                         |
| 317       | T             | 69            | 68           | 1             | 0:02.92                         |
| 318       | T             | 58            | 58           | 0             | 0:02.41                         |
| 319       | T             | 58            | 58           | 0             | 0:02.43                         |
| 320       | T             | 69            | 68           | 1             | 0:02.86                         |
| 321       | T             | 69            | 68           | 1             | 0:02.85                         |
| 322       | T             | 58            | 58           | 0             | 0:02.43                         |

| <b>Id</b> | <b>Result</b> | <b>#total</b> | <b>#true</b> | <b>#false</b> | <b>Execution time (min:sec)</b> |
|-----------|---------------|---------------|--------------|---------------|---------------------------------|
| 323       | T             | 58            | 58           | 0             | 0:02.42                         |
| 324       | T             | 58            | 58           | 0             | 0:02.41                         |
| 325       | T             | 69            | 68           | 1             | 0:02.86                         |
| 326       | T             | 69            | 68           | 1             | 0:02.90                         |
| 327       | T             | 69            | 68           | 1             | 0:02.84                         |
| 328       | T             | 58            | 58           | 0             | 0:02.41                         |
| 329       | T             | 58            | 58           | 0             | 0:02.40                         |
| 330       | T             | 58            | 58           | 0             | 0:02.47                         |
| 331       | T             | 58            | 58           | 0             | 0:02.43                         |
| 332       | T             | 83            | 81           | 2             | 0:03.46                         |
| 333       | T             | 58            | 58           | 0             | 0:02.43                         |
| 334       | T             | 124           | 119          | 5             | 0:05.16                         |
| 335       | T             | 58            | 58           | 0             | 0:02.42                         |
| 336       | T             | 69            | 68           | 1             | 0:02.86                         |
| 337       | T             | 58            | 58           | 0             | 0:02.41                         |
| 338       | T             | 69            | 68           | 1             | 0:02.84                         |
| 339       | T             | 58            | 58           | 0             | 0:02.43                         |
| 340       | T             | 58            | 58           | 0             | 0:02.43                         |
| 341       | T             | 58            | 58           | 0             | 0:02.38                         |
| 342       | T             | 69            | 68           | 1             | 0:02.88                         |
| 343       | T             | 58            | 58           | 0             | 0:02.42                         |
| 344       | T             | 69            | 68           | 1             | 0:02.86                         |
| 345       | T             | 58            | 58           | 0             | 0:02.46                         |
| 346       | T             | 58            | 58           | 0             | 0:02.41                         |
| 347       | T             | 69            | 68           | 1             | 0:02.90                         |
| 348       | T             | 69            | 68           | 1             | 0:02.85                         |
| 349       | T             | 58            | 58           | 0             | 0:02.41                         |
| 350       | T             | 83            | 81           | 2             | 0:03.45                         |
| 351       | T             | 69            | 68           | 1             | 0:02.84                         |
| 352       | T             | 58            | 58           | 0             | 0:02.45                         |
| 353       | T             | 58            | 58           | 0             | 0:02.40                         |
| 354       | T             | 58            | 58           | 0             | 0:02.39                         |
| 355       | T             | 58            | 58           | 0             | 0:02.45                         |
| 356       | T             | 69            | 68           | 1             | 0:02.86                         |
| 357       | T             | 58            | 58           | 0             | 0:02.45                         |
| 358       | T             | 58            | 58           | 0             | 0:02.43                         |
| 359       | T             | 83            | 81           | 2             | 0:03.42                         |
| 360       | T             | 69            | 68           | 1             | 0:03.45                         |
| 361       | T             | 58            | 58           | 0             | 0:03.60                         |
| 362       | T             | 69            | 68           | 1             | 0:02.83                         |
| 363       | T             | 69            | 68           | 1             | 0:02.85                         |
| 364       | T             | 69            | 68           | 1             | 0:02.87                         |
| 365       | T             | 83            | 81           | 2             | 0:03.43                         |
| 366       | T             | 58            | 58           | 0             | 0:02.46                         |
| 367       | T             | 83            | 81           | 2             | 0:03.44                         |
| 368       | T             | 110           | 106          | 4             | 0:04.54                         |
| 369       | T             | 69            | 68           | 1             | 0:02.89                         |
| 370       | T             | 83            | 81           | 2             | 0:03.44                         |

| <b>Id</b> | <b>Result</b> | <b>#total</b> | <b>#true</b> | <b>#false</b> | <b>Execution time (min:sec)</b> |
|-----------|---------------|---------------|--------------|---------------|---------------------------------|
| 371       | T             | 69            | 68           | 1             | 0:02.89                         |
| 372       | T             | 58            | 58           | 0             | 0:02.44                         |
| 373       | T             | 83            | 81           | 2             | 0:03.41                         |
| 374       | T             | 83            | 81           | 2             | 0:03.44                         |
| 375       | T             | 58            | 58           | 0             | 0:02.41                         |
| 376       | T             | 58            | 58           | 0             | 0:02.43                         |
| 377       | T             | 58            | 58           | 0             | 0:02.38                         |
| 378       | T             | 58            | 58           | 0             | 0:02.42                         |
| 379       | T             | 58            | 58           | 0             | 0:02.38                         |
| 380       | T             | 58            | 58           | 0             | 0:02.37                         |
| 381       | T             | 58            | 58           | 0             | 0:02.39                         |
| 382       | T             | 83            | 81           | 2             | 0:03.44                         |
| 383       | T             | 58            | 58           | 0             | 0:02.39                         |
| 384       | T             | 58            | 58           | 0             | 0:02.42                         |
| 385       | T             | 69            | 68           | 1             | 0:02.82                         |
| 386       | T             | 58            | 58           | 0             | 0:02.45                         |
| 387       | T             | 69            | 68           | 1             | 0:02.90                         |
| 388       | T             | 83            | 81           | 2             | 0:03.45                         |
| 389       | T             | 69            | 68           | 1             | 0:02.84                         |
| 390       | T             | 69            | 68           | 1             | 0:02.85                         |
| 391       | T             | 69            | 68           | 1             | 0:02.86                         |
| 392       | T             | 58            | 58           | 0             | 0:02.40                         |
| 393       | T             | 58            | 58           | 0             | 0:02.39                         |
| 394       | T             | 58            | 58           | 0             | 0:02.39                         |
| 395       | T             | 58            | 58           | 0             | 0:02.44                         |
| 396       | T             | 83            | 81           | 2             | 0:03.48                         |
| 397       | T             | 69            | 68           | 1             | 0:02.89                         |
| 398       | T             | 69            | 68           | 1             | 0:02.86                         |
| 399       | T             | 83            | 81           | 2             | 0:03.40                         |
| 400       | T             | 58            | 58           | 0             | 0:02.45                         |
| 401       | T             | 69            | 68           | 1             | 0:02.85                         |
| 402       | T             | 58            | 58           | 0             | 0:02.43                         |
| 403       | T             | 110           | 106          | 4             | 0:04.59                         |
| 404       | T             | 58            | 58           | 0             | 0:02.45                         |
| 405       | T             | 58            | 58           | 0             | 0:02.42                         |
| 406       | T             | 58            | 58           | 0             | 0:02.40                         |
| 407       | T             | 58            | 58           | 0             | 0:03.61                         |
| 408       | T             | 58            | 58           | 0             | 0:02.38                         |
| 409       | T             | 58            | 58           | 0             | 0:02.39                         |
| 410       | T             | 58            | 58           | 0             | 0:02.76                         |
| 411       | T             | 58            | 58           | 0             | 0:02.43                         |
| 412       | T             | 58            | 58           | 0             | 0:02.46                         |
| 413       | T             | 69            | 68           | 1             | 0:02.91                         |
| 414       | T             | 58            | 58           | 0             | 0:02.38                         |
| 415       | T             | 69            | 68           | 1             | 0:02.85                         |
| 416       | T             | 58            | 58           | 0             | 0:02.39                         |
| 417       | T             | 58            | 58           | 0             | 0:02.38                         |
| 418       | T             | 58            | 58           | 0             | 0:02.46                         |

| <b>Id</b> | <b>Result</b> | <b>#total</b> | <b>#true</b> | <b>#false</b> | <b>Execution time (min:sec)</b> |
|-----------|---------------|---------------|--------------|---------------|---------------------------------|
| 419       | T             | 69            | 68           | 1             | 0:02.83                         |
| 420       | T             | 58            | 58           | 0             | 0:02.39                         |
| 421       | T             | 69            | 68           | 1             | 0:02.85                         |
| 422       | T             | 69            | 68           | 1             | 0:02.88                         |
| 423       | T             | 83            | 81           | 2             | 0:03.44                         |
| 424       | T             | 58            | 58           | 0             | 0:02.40                         |
| 425       | T             | 83            | 81           | 2             | 0:03.45                         |
| 426       | T             | 69            | 68           | 1             | 0:02.90                         |
| 427       | T             | 69            | 68           | 1             | 0:02.89                         |
| 428       | T             | 58            | 58           | 0             | 0:02.44                         |
| 429       | T             | 69            | 68           | 1             | 0:02.89                         |
| 430       | T             | 96            | 93           | 3             | 0:05.60                         |
| 431       | T             | 69            | 68           | 1             | 0:02.85                         |
| 432       | T             | 69            | 68           | 1             | 0:02.81                         |
| 433       | T             | 83            | 81           | 2             | 0:03.41                         |
| 434       | T             | 58            | 58           | 0             | 0:02.42                         |
| 435       | T             | 58            | 58           | 0             | 0:02.41                         |
| 436       | T             | 69            | 68           | 1             | 0:02.88                         |
| 437       | T             | 58            | 58           | 0             | 0:02.39                         |
| 438       | T             | 58            | 58           | 0             | 0:02.39                         |
| 439       | T             | 58            | 58           | 0             | 0:02.46                         |
| 440       | T             | 58            | 58           | 0             | 0:02.40                         |
| 441       | T             | 69            | 68           | 1             | 0:02.87                         |
| 442       | T             | 83            | 81           | 2             | 0:03.46                         |
| 443       | T             | 83            | 81           | 2             | 0:03.43                         |
| 444       | T             | 58            | 58           | 0             | 0:02.49                         |
| 445       | T             | 83            | 81           | 2             | 0:03.42                         |
| 446       | T             | 83            | 81           | 2             | 0:03.41                         |
| 447       | T             | 58            | 58           | 0             | 0:02.44                         |
| 448       | T             | 96            | 93           | 3             | 0:04.31                         |
| 449       | T             | 124           | 119          | 5             | 0:05.17                         |
| 450       | T             | 96            | 93           | 3             | 0:03.96                         |
| 451       | T             | 69            | 68           | 1             | 0:02.89                         |
| 452       | T             | 58            | 58           | 0             | 0:02.44                         |
| 453       | T             | 96            | 93           | 3             | 0:04.02                         |
| 454       | T             | 58            | 58           | 0             | 0:02.40                         |
| 455       | T             | 58            | 58           | 0             | 0:02.43                         |
| 456       | T             | 69            | 68           | 1             | 0:02.88                         |
| 457       | T             | 58            | 58           | 0             | 0:02.46                         |
| 458       | T             | 69            | 68           | 1             | 0:02.85                         |
| 459       | T             | 58            | 58           | 0             | 0:02.40                         |
| 460       | T             | 58            | 58           | 0             | 0:02.40                         |
| 461       | T             | 69            | 68           | 1             | 0:02.84                         |
| 462       | T             | 69            | 68           | 1             | 0:02.88                         |
| 463       | T             | 58            | 58           | 0             | 0:02.39                         |
| 464       | T             | 58            | 58           | 0             | 0:02.41                         |
| 465       | T             | 58            | 58           | 0             | 0:02.39                         |
| 466       | T             | 83            | 81           | 2             | 0:03.43                         |

| <b>Id</b> | <b>Result</b> | <b>#total</b> | <b>#true</b> | <b>#false</b> | <b>Execution time (min:sec)</b> |
|-----------|---------------|---------------|--------------|---------------|---------------------------------|
| 467       | T             | 96            | 93           | 3             | 0:03.99                         |
| 468       | T             | 58            | 58           | 0             | 0:02.41                         |
| 469       | T             | 58            | 58           | 0             | 0:02.42                         |
| 470       | T             | 58            | 58           | 0             | 0:02.40                         |
| 471       | T             | 69            | 68           | 1             | 0:02.84                         |
| 472       | T             | 58            | 58           | 0             | 0:02.37                         |
| 473       | T             | 58            | 58           | 0             | 0:02.47                         |
| 474       | T             | 96            | 93           | 3             | 0:03.98                         |
| 475       | T             | 83            | 81           | 2             | 0:03.46                         |
| 476       | T             | 83            | 81           | 2             | 0:03.41                         |
| 477       | T             | 58            | 58           | 0             | 0:02.40                         |
| 478       | T             | 58            | 58           | 0             | 0:02.44                         |
| 479       | T             | 69            | 68           | 1             | 0:02.85                         |
| 480       | T             | 83            | 81           | 2             | 0:03.44                         |
| 481       | T             | 58            | 58           | 0             | 0:02.39                         |
| 482       | T             | 69            | 68           | 1             | 0:02.86                         |
| 483       | T             | 69            | 68           | 1             | 0:02.88                         |
| 484       | T             | 69            | 68           | 1             | 0:02.88                         |
| 485       | T             | 69            | 68           | 1             | 0:02.83                         |
| 486       | T             | 58            | 58           | 0             | 0:02.43                         |
| 487       | T             | 83            | 81           | 2             | 0:03.42                         |
| 488       | T             | 58            | 58           | 0             | 0:02.43                         |
| 489       | T             | 69            | 68           | 1             | 0:02.80                         |
| 490       | T             | 58            | 58           | 0             | 0:02.40                         |
| 491       | T             | 58            | 58           | 0             | 0:02.43                         |
| 492       | T             | 58            | 58           | 0             | 0:02.97                         |
| 493       | T             | 83            | 81           | 2             | 0:03.43                         |
| 494       | T             | 83            | 81           | 2             | 0:03.44                         |
| 495       | T             | 69            | 68           | 1             | 0:02.85                         |
| 496       | T             | 69            | 68           | 1             | 0:02.87                         |
| 497       | T             | 58            | 58           | 0             | 0:02.43                         |
| 498       | T             | 83            | 81           | 2             | 0:03.49                         |
| 499       | T             | 69            | 68           | 1             | 0:02.83                         |
| 500       | T             | 83            | 81           | 2             | 0:03.48                         |

Table 2: Model checking results corresponding to logic property 2

| <b>Id</b> | <b>Result</b> | <b>#total</b> | <b>#true</b> | <b>#false</b> | <b>Execution time (min:sec)</b> |
|-----------|---------------|---------------|--------------|---------------|---------------------------------|
| 1         | T             | 142           | 1            | 141           | 0:05.83                         |
| 2         | T             | 225           | 4            | 221           | 0:09.19                         |
| 3         | T             | 169           | 2            | 167           | 0:09.95                         |
| 4         | T             | 169           | 2            | 167           | 0:10.88                         |
| 5         | T             | 197           | 3            | 194           | 0:12.61                         |
| 6         | T             | 225           | 4            | 221           | 0:10.41                         |
| 7         | T             | 58            | 0            | 58            | 0:02.38                         |

| <b>Id</b> | <b>Result</b> | <b>#total</b> | <b>#true</b> | <b>#false</b> | <b>Execution time (min:sec)</b> |
|-----------|---------------|---------------|--------------|---------------|---------------------------------|
| 8         | T             | 58            | 0            | 58            | 0:03.03                         |
| 9         | T             | 58            | 0            | 58            | 0:02.40                         |
| 10        | T             | 58            | 0            | 58            | 0:02.40                         |
| 11        | T             | 142           | 1            | 141           | 0:05.81                         |
| 12        | T             | 58            | 0            | 58            | 0:02.40                         |
| 13        | T             | 142           | 1            | 141           | 0:05.83                         |
| 14        | T             | 142           | 1            | 141           | 0:05.81                         |
| 15        | T             | 197           | 3            | 194           | 0:08.31                         |
| 16        | T             | 58            | 0            | 58            | 0:02.42                         |
| 17        | T             | 58            | 0            | 58            | 0:02.43                         |
| 18        | T             | 142           | 1            | 141           | 0:05.83                         |
| 19        | T             | 58            | 0            | 58            | 0:03.47                         |
| 20        | T             | 58            | 0            | 58            | 0:02.40                         |
| 21        | T             | 58            | 0            | 58            | 0:02.39                         |
| 22        | T             | 252           | 5            | 247           | 0:16.79                         |
| 23        | T             | 58            | 0            | 58            | 0:02.41                         |
| 24        | T             | 169           | 2            | 167           | 0:06.95                         |
| 25        | T             | 58            | 0            | 58            | 0:02.47                         |
| 26        | T             | 58            | 0            | 58            | 0:02.45                         |
| 27        | T             | 58            | 0            | 58            | 0:02.40                         |
| 28        | T             | 58            | 0            | 58            | 0:02.40                         |
| 29        | T             | 58            | 0            | 58            | 0:02.38                         |
| 30        | T             | 142           | 1            | 141           | 0:05.83                         |
| 31        | T             | 58            | 0            | 58            | 0:02.45                         |
| 32        | T             | 169           | 2            | 167           | 0:07.00                         |
| 33        | T             | 58            | 0            | 58            | 0:02.41                         |
| 34        | T             | 142           | 1            | 141           | 0:05.86                         |
| 35        | T             | 142           | 1            | 141           | 0:05.79                         |
| 36        | T             | 142           | 1            | 141           | 0:05.85                         |
| 37        | T             | 197           | 3            | 194           | 0:08.04                         |
| 38        | T             | 58            | 0            | 58            | 0:02.40                         |
| 39        | T             | 142           | 1            | 141           | 0:09.28                         |
| 40        | T             | 169           | 2            | 167           | 0:07.01                         |
| 41        | T             | 142           | 1            | 141           | 0:05.75                         |
| 42        | T             | 142           | 1            | 141           | 0:06.91                         |
| 43        | T             | 197           | 3            | 194           | 0:12.41                         |
| 44        | T             | 142           | 1            | 141           | 0:05.82                         |
| 45        | T             | 58            | 0            | 58            | 0:02.43                         |
| 46        | T             | 169           | 2            | 167           | 0:06.94                         |
| 47        | T             | 58            | 0            | 58            | 0:02.44                         |
| 48        | T             | 58            | 0            | 58            | 0:02.44                         |
| 49        | T             | 169           | 2            | 167           | 0:06.91                         |
| 50        | T             | 58            | 0            | 58            | 0:02.39                         |
| 51        | T             | 142           | 1            | 141           | 0:05.81                         |
| 52        | T             | 58            | 0            | 58            | 0:02.41                         |
| 53        | T             | 197           | 3            | 194           | 0:08.00                         |
| 54        | T             | 169           | 2            | 167           | 0:06.98                         |
| 55        | T             | 58            | 0            | 58            | 0:02.43                         |

| <b>Id</b> | <b>Result</b> | <b>#total</b> | <b>#true</b> | <b>#false</b> | <b>Execution time (min:sec)</b> |
|-----------|---------------|---------------|--------------|---------------|---------------------------------|
| 56        | T             | 58            | 0            | 58            | 0:02.41                         |
| 57        | T             | 58            | 0            | 58            | 0:02.42                         |
| 58        | T             | 197           | 3            | 194           | 0:12.47                         |
| 59        | T             | 58            | 0            | 58            | 0:02.41                         |
| 60        | T             | 197           | 3            | 194           | 0:08.06                         |
| 61        | T             | 58            | 0            | 58            | 0:02.44                         |
| 62        | T             | 169           | 2            | 167           | 0:06.92                         |
| 63        | T             | 58            | 0            | 58            | 0:02.43                         |
| 64        | T             | 197           | 3            | 194           | 0:08.06                         |
| 65        | T             | 58            | 0            | 58            | 0:02.38                         |
| 66        | T             | 58            | 0            | 58            | 0:02.42                         |
| 67        | T             | 58            | 0            | 58            | 0:03.38                         |
| 68        | T             | 197           | 3            | 194           | 0:08.04                         |
| 69        | T             | 58            | 0            | 58            | 0:02.40                         |
| 70        | T             | 58            | 0            | 58            | 0:02.42                         |
| 71        | T             | 58            | 0            | 58            | 0:02.99                         |
| 72        | T             | 58            | 0            | 58            | 0:02.39                         |
| 73        | T             | 58            | 0            | 58            | 0:02.48                         |
| 74        | T             | 58            | 0            | 58            | 0:02.45                         |
| 75        | T             | 142           | 1            | 141           | 0:05.79                         |
| 76        | T             | 58            | 0            | 58            | 0:02.40                         |
| 77        | T             | 58            | 0            | 58            | 0:02.41                         |
| 78        | T             | 169           | 2            | 167           | 0:06.87                         |
| 79        | T             | 58            | 0            | 58            | 0:02.38                         |
| 80        | T             | 169           | 2            | 167           | 0:06.94                         |
| 81        | T             | 58            | 0            | 58            | 0:02.46                         |
| 82        | T             | 197           | 3            | 194           | 0:08.04                         |
| 83        | T             | 58            | 0            | 58            | 0:02.42                         |
| 84        | T             | 142           | 1            | 141           | 0:05.80                         |
| 85        | T             | 58            | 0            | 58            | 0:02.00                         |
| 86        | T             | 142           | 1            | 141           | 0:05.81                         |
| 87        | T             | 58            | 0            | 58            | 0:02.45                         |
| 88        | T             | 58            | 0            | 58            | 0:02.42                         |
| 89        | T             | 58            | 0            | 58            | 0:02.40                         |
| 90        | T             | 58            | 0            | 58            | 0:02.40                         |
| 91        | T             | 58            | 0            | 58            | 0:02.42                         |
| 92        | T             | 169           | 2            | 167           | 0:06.91                         |
| 93        | T             | 58            | 0            | 58            | 0:02.84                         |
| 94        | T             | 58            | 0            | 58            | 0:02.46                         |
| 95        | T             | 142           | 1            | 141           | 0:05.83                         |
| 96        | T             | 58            | 0            | 58            | 0:02.40                         |
| 97        | T             | 58            | 0            | 58            | 0:02.44                         |
| 98        | T             | 197           | 3            | 194           | 0:08.08                         |
| 99        | T             | 58            | 0            | 58            | 0:02.40                         |
| 100       | T             | 169           | 2            | 167           | 0:06.89                         |
| 101       | T             | 58            | 0            | 58            | 0:02.42                         |
| 102       | T             | 58            | 0            | 58            | 0:02.42                         |
| 103       | T             | 58            | 0            | 58            | 0:02.43                         |

| <b>Id</b> | <b>Result</b> | <b>#total</b> | <b>#true</b> | <b>#false</b> | <b>Execution time (min:sec)</b> |
|-----------|---------------|---------------|--------------|---------------|---------------------------------|
| 104       | T             | 58            | 0            | 58            | 0:02.45                         |
| 105       | T             | 142           | 1            | 141           | 0:05.86                         |
| 106       | T             | 58            | 0            | 58            | 0:02.39                         |
| 107       | T             | 169           | 2            | 167           | 0:07.17                         |
| 108       | T             | 58            | 0            | 58            | 0:02.39                         |
| 109       | T             | 169           | 2            | 167           | 0:06.88                         |
| 110       | T             | 142           | 1            | 141           | 0:05.86                         |
| 111       | T             | 169           | 2            | 167           | 0:06.89                         |
| 112       | T             | 225           | 4            | 221           | 0:09.27                         |
| 113       | T             | 197           | 3            | 194           | 0:07.98                         |
| 114       | T             | 197           | 3            | 194           | 0:08.08                         |
| 115       | T             | 225           | 4            | 221           | 0:09.24                         |
| 116       | T             | 142           | 1            | 141           | 0:05.87                         |
| 117       | T             | 58            | 0            | 58            | 0:02.43                         |
| 118       | T             | 58            | 0            | 58            | 0:02.43                         |
| 119       | T             | 58            | 0            | 58            | 0:02.43                         |
| 120       | T             | 197           | 3            | 194           | 0:08.02                         |
| 121       | T             | 225           | 4            | 221           | 0:09.19                         |
| 122       | T             | 58            | 0            | 58            | 0:02.43                         |
| 123       | T             | 169           | 2            | 167           | 0:06.92                         |
| 124       | T             | 58            | 0            | 58            | 0:02.43                         |
| 125       | T             | 197           | 3            | 194           | 0:07.37                         |
| 126       | T             | 58            | 0            | 58            | 0:02.45                         |
| 127       | T             | 58            | 0            | 58            | 0:02.44                         |
| 128       | T             | 58            | 0            | 58            | 0:02.39                         |
| 129       | T             | 169           | 2            | 167           | 0:06.98                         |
| 130       | T             | 58            | 0            | 58            | 0:02.46                         |
| 131       | T             | 142           | 1            | 141           | 0:05.81                         |
| 132       | T             | 169           | 2            | 167           | 0:06.93                         |
| 133       | T             | 142           | 1            | 141           | 0:05.84                         |
| 134       | T             | 58            | 0            | 58            | 0:02.46                         |
| 135       | T             | 58            | 0            | 58            | 0:02.41                         |
| 136       | T             | 169           | 2            | 167           | 0:06.97                         |
| 137       | T             | 58            | 0            | 58            | 0:02.44                         |
| 138       | T             | 197           | 3            | 194           | 0:08.08                         |
| 139       | T             | 142           | 1            | 141           | 0:05.86                         |
| 140       | T             | 197           | 3            | 194           | 0:08.10                         |
| 141       | T             | 58            | 0            | 58            | 0:02.43                         |
| 142       | T             | 58            | 0            | 58            | 0:02.42                         |
| 143       | T             | 142           | 1            | 141           | 0:05.82                         |
| 144       | T             | 197           | 3            | 194           | 0:08.07                         |
| 145       | T             | 169           | 2            | 167           | 0:06.94                         |
| 146       | T             | 58            | 0            | 58            | 0:02.41                         |
| 147       | T             | 58            | 0            | 58            | 0:02.62                         |
| 148       | T             | 142           | 1            | 141           | 0:05.82                         |
| 149       | T             | 58            | 0            | 58            | 0:02.37                         |
| 150       | T             | 58            | 0            | 58            | 0:02.43                         |
| 151       | T             | 58            | 0            | 58            | 0:02.47                         |



| <b>Id</b> | <b>Result</b> | <b>#total</b> | <b>#true</b> | <b>#false</b> | <b>Execution time (min:sec)</b> |
|-----------|---------------|---------------|--------------|---------------|---------------------------------|
| 152       | T             | 58            | 0            | 58            | 0:02.43                         |
| 153       | T             | 142           | 1            | 141           | 0:05.82                         |
| 154       | T             | 142           | 1            | 141           | 0:05.82                         |
| 155       | T             | 58            | 0            | 58            | 0:02.41                         |
| 156       | T             | 58            | 0            | 58            | 0:02.44                         |
| 157       | T             | 58            | 0            | 58            | 0:02.42                         |
| 158       | T             | 58            | 0            | 58            | 0:02.40                         |
| 159       | T             | 142           | 1            | 141           | 0:05.89                         |
| 160       | T             | 58            | 0            | 58            | 0:02.43                         |
| 161       | T             | 58            | 0            | 58            | 0:02.41                         |
| 162       | T             | 58            | 0            | 58            | 0:02.45                         |
| 163       | T             | 169           | 2            | 167           | 0:06.89                         |
| 164       | T             | 169           | 2            | 167           | 0:06.94                         |
| 165       | T             | 58            | 0            | 58            | 0:02.39                         |
| 166       | T             | 58            | 0            | 58            | 0:02.39                         |
| 167       | T             | 197           | 3            | 194           | 0:08.06                         |
| 168       | T             | 58            | 0            | 58            | 0:02.45                         |
| 169       | T             | 142           | 1            | 141           | 0:05.82                         |
| 170       | T             | 58            | 0            | 58            | 0:02.42                         |
| 171       | T             | 142           | 1            | 141           | 0:05.96                         |
| 172       | T             | 58            | 0            | 58            | 0:02.40                         |
| 173       | T             | 169           | 2            | 167           | 0:06.92                         |
| 174       | T             | 169           | 2            | 167           | 0:06.95                         |
| 175       | T             | 58            | 0            | 58            | 0:02.41                         |
| 176       | T             | 58            | 0            | 58            | 0:02.41                         |
| 177       | T             | 58            | 0            | 58            | 0:02.46                         |
| 178       | T             | 58            | 0            | 58            | 0:02.43                         |
| 179       | T             | 142           | 1            | 141           | 0:07.77                         |
| 180       | T             | 58            | 0            | 58            | 0:02.42                         |
| 181       | T             | 58            | 0            | 58            | 0:02.39                         |
| 182       | T             | 197           | 3            | 194           | 0:11.33                         |
| 183       | T             | 58            | 0            | 58            | 0:03.54                         |
| 184       | T             | 197           | 3            | 194           | 0:08.05                         |
| 185       | T             | 58            | 0            | 58            | 0:02.44                         |
| 186       | T             | 58            | 0            | 58            | 0:02.42                         |
| 187       | T             | 58            | 0            | 58            | 0:02.41                         |
| 188       | T             | 58            | 0            | 58            | 0:02.66                         |
| 189       | T             | 142           | 1            | 141           | 0:05.83                         |
| 190       | T             | 169           | 2            | 167           | 0:06.93                         |
| 191       | T             | 58            | 0            | 58            | 0:02.49                         |
| 192       | T             | 142           | 1            | 141           | 0:05.80                         |
| 193       | T             | 58            | 0            | 58            | 0:02.41                         |
| 194       | T             | 58            | 0            | 58            | 0:02.40                         |
| 195       | T             | 58            | 0            | 58            | 0:02.44                         |
| 196       | T             | 58            | 0            | 58            | 0:02.44                         |
| 197       | T             | 58            | 0            | 58            | 0:02.38                         |
| 198       | T             | 58            | 0            | 58            | 0:02.43                         |
| 199       | T             | 58            | 0            | 58            | 0:02.42                         |

| <b>Id</b> | <b>Result</b> | <b>#total</b> | <b>#true</b> | <b>#false</b> | <b>Execution time (min:sec)</b> |
|-----------|---------------|---------------|--------------|---------------|---------------------------------|
| 200       | T             | 58            | 0            | 58            | 0:02.45                         |
| 201       | T             | 142           | 1            | 141           | 0:08.38                         |
| 202       | T             | 169           | 2            | 167           | 0:06.94                         |
| 203       | T             | 58            | 0            | 58            | 0:02.42                         |
| 204       | T             | 142           | 1            | 141           | 0:05.78                         |
| 205       | T             | 58            | 0            | 58            | 0:02.43                         |
| 206       | T             | 58            | 0            | 58            | 0:02.42                         |
| 207       | T             | 142           | 1            | 141           | 0:03.90                         |
| 208       | T             | 142           | 1            | 141           | 0:05.81                         |
| 209       | T             | 142           | 1            | 141           | 0:05.78                         |
| 210       | T             | 58            | 0            | 58            | 0:02.41                         |
| 211       | T             | 169           | 2            | 167           | 0:07.04                         |
| 212       | T             | 58            | 0            | 58            | 0:02.43                         |
| 213       | T             | 58            | 0            | 58            | 0:02.44                         |
| 214       | T             | 58            | 0            | 58            | 0:02.44                         |
| 215       | T             | 197           | 3            | 194           | 0:08.04                         |
| 216       | T             | 58            | 0            | 58            | 0:02.44                         |
| 217       | T             | 58            | 0            | 58            | 0:02.44                         |
| 218       | T             | 58            | 0            | 58            | 0:02.41                         |
| 219       | T             | 58            | 0            | 58            | 0:02.41                         |
| 220       | T             | 169           | 2            | 167           | 0:06.94                         |
| 221       | T             | 58            | 0            | 58            | 0:02.40                         |
| 222       | T             | 169           | 2            | 167           | 0:06.91                         |
| 223       | T             | 225           | 4            | 221           | 0:09.21                         |
| 224       | T             | 197           | 3            | 194           | 0:08.08                         |
| 225       | T             | 58            | 0            | 58            | 0:02.41                         |
| 226       | T             | 58            | 0            | 58            | 0:02.42                         |
| 227       | T             | 58            | 0            | 58            | 0:02.42                         |
| 228       | T             | 58            | 0            | 58            | 0:02.46                         |
| 229       | T             | 58            | 0            | 58            | 0:02.42                         |
| 230       | T             | 169           | 2            | 167           | 0:06.91                         |
| 231       | T             | 169           | 2            | 167           | 0:06.92                         |
| 232       | T             | 197           | 3            | 194           | 0:07.84                         |
| 233       | T             | 58            | 0            | 58            | 0:02.37                         |
| 234       | T             | 58            | 0            | 58            | 0:02.42                         |
| 235       | T             | 58            | 0            | 58            | 0:02.42                         |
| 236       | T             | 58            | 0            | 58            | 0:03.82                         |
| 237       | T             | 58            | 0            | 58            | 0:02.44                         |
| 238       | T             | 58            | 0            | 58            | 0:02.43                         |
| 239       | T             | 58            | 0            | 58            | 0:02.44                         |
| 240       | T             | 58            | 0            | 58            | 0:02.45                         |
| 241       | T             | 58            | 0            | 58            | 0:02.42                         |
| 242       | T             | 142           | 1            | 141           | 0:05.85                         |
| 243       | T             | 169           | 2            | 167           | 0:06.98                         |
| 244       | T             | 58            | 0            | 58            | 0:02.38                         |
| 245       | T             | 58            | 0            | 58            | 0:02.44                         |
| 246       | T             | 58            | 0            | 58            | 0:02.46                         |
| 247       | T             | 169           | 2            | 167           | 0:06.91                         |

| <b>Id</b> | <b>Result</b> | <b>#total</b> | <b>#true</b> | <b>#false</b> | <b>Execution time (min:sec)</b> |
|-----------|---------------|---------------|--------------|---------------|---------------------------------|
| 248       | T             | 58            | 0            | 58            | 0:02.42                         |
| 249       | T             | 142           | 1            | 141           | 0:05.79                         |
| 250       | T             | 142           | 1            | 141           | 0:05.92                         |
| 251       | T             | 169           | 2            | 167           | 0:06.89                         |
| 252       | T             | 58            | 0            | 58            | 0:02.38                         |
| 253       | T             | 58            | 0            | 58            | 0:02.48                         |
| 254       | T             | 58            | 0            | 58            | 0:02.42                         |
| 255       | T             | 58            | 0            | 58            | 0:02.38                         |
| 256       | T             | 58            | 0            | 58            | 0:02.45                         |
| 257       | T             | 169           | 2            | 167           | 0:06.90                         |
| 258       | T             | 142           | 1            | 141           | 0:05.81                         |
| 259       | T             | 225           | 4            | 221           | 0:09.25                         |
| 260       | T             | 58            | 0            | 58            | 0:02.41                         |
| 261       | T             | 58            | 0            | 58            | 0:02.45                         |
| 262       | T             | 58            | 0            | 58            | 0:02.44                         |
| 263       | T             | 169           | 2            | 167           | 0:06.92                         |
| 264       | T             | 58            | 0            | 58            | 0:02.40                         |
| 265       | T             | 58            | 0            | 58            | 0:02.46                         |
| 266       | T             | 58            | 0            | 58            | 0:02.43                         |
| 267       | T             | 58            | 0            | 58            | 0:02.42                         |
| 268       | T             | 58            | 0            | 58            | 0:02.40                         |
| 269       | T             | 58            | 0            | 58            | 0:02.41                         |
| 270       | T             | 58            | 0            | 58            | 0:02.43                         |
| 271       | T             | 58            | 0            | 58            | 0:02.41                         |
| 272       | T             | 58            | 0            | 58            | 0:02.45                         |
| 273       | T             | 58            | 0            | 58            | 0:02.42                         |
| 274       | T             | 58            | 0            | 58            | 0:02.42                         |
| 275       | T             | 58            | 0            | 58            | 0:02.43                         |
| 276       | T             | 142           | 1            | 141           | 0:05.89                         |
| 277       | T             | 58            | 0            | 58            | 0:02.39                         |
| 278       | T             | 58            | 0            | 58            | 0:02.43                         |
| 279       | T             | 142           | 1            | 141           | 0:05.92                         |
| 280       | T             | 58            | 0            | 58            | 0:02.43                         |
| 281       | T             | 142           | 1            | 141           | 0:05.83                         |
| 282       | T             | 58            | 0            | 58            | 0:02.45                         |
| 283       | T             | 58            | 0            | 58            | 0:02.42                         |
| 284       | T             | 58            | 0            | 58            | 0:02.44                         |
| 285       | T             | 197           | 3            | 194           | 0:08.08                         |
| 286       | T             | 58            | 0            | 58            | 0:02.40                         |
| 287       | T             | 169           | 2            | 167           | 0:06.92                         |
| 288       | T             | 169           | 2            | 167           | 0:06.90                         |
| 289       | T             | 280           | 6            | 274           | 0:11.49                         |
| 290       | T             | 58            | 0            | 58            | 0:02.46                         |
| 291       | T             | 58            | 0            | 58            | 0:02.23                         |
| 292       | T             | 58            | 0            | 58            | 0:02.45                         |
| 293       | T             | 225           | 4            | 221           | 0:09.19                         |
| 294       | T             | 58            | 0            | 58            | 0:02.45                         |
| 295       | T             | 58            | 0            | 58            | 0:02.42                         |

| <b>Id</b> | <b>Result</b> | <b>#total</b> | <b>#true</b> | <b>#false</b> | <b>Execution time (min:sec)</b> |
|-----------|---------------|---------------|--------------|---------------|---------------------------------|
| 296       | T             | 169           | 2            | 167           | 0:09.16                         |
| 297       | T             | 58            | 0            | 58            | 0:02.41                         |
| 298       | T             | 225           | 4            | 221           | 0:09.35                         |
| 299       | T             | 225           | 4            | 221           | 0:10.63                         |
| 300       | T             | 58            | 0            | 58            | 0:02.46                         |
| 301       | T             | 142           | 1            | 141           | 0:05.85                         |
| 302       | T             | 58            | 0            | 58            | 0:02.39                         |
| 303       | T             | 58            | 0            | 58            | 0:02.41                         |
| 304       | T             | 58            | 0            | 58            | 0:02.41                         |
| 305       | T             | 58            | 0            | 58            | 0:02.40                         |
| 306       | T             | 197           | 3            | 194           | 0:08.06                         |
| 307       | T             | 58            | 0            | 58            | 0:02.41                         |
| 308       | T             | 58            | 0            | 58            | 0:02.43                         |
| 309       | T             | 58            | 0            | 58            | 0:02.41                         |
| 310       | T             | 58            | 0            | 58            | 0:02.49                         |
| 311       | T             | 225           | 4            | 221           | 0:09.22                         |
| 312       | T             | 58            | 0            | 58            | 0:02.40                         |
| 313       | T             | 58            | 0            | 58            | 0:02.44                         |
| 314       | T             | 169           | 2            | 167           | 0:07.01                         |
| 315       | T             | 58            | 0            | 58            | 0:02.41                         |
| 316       | T             | 58            | 0            | 58            | 0:02.39                         |
| 317       | T             | 58            | 0            | 58            | 0:02.46                         |
| 318       | T             | 197           | 3            | 194           | 0:08.05                         |
| 319       | T             | 142           | 1            | 141           | 0:05.84                         |
| 320       | T             | 58            | 0            | 58            | 0:02.40                         |
| 321       | T             | 142           | 1            | 141           | 0:05.88                         |
| 322       | T             | 142           | 1            | 141           | 0:05.91                         |
| 323       | T             | 58            | 0            | 58            | 0:02.41                         |
| 324       | T             | 169           | 2            | 167           | 0:06.93                         |
| 325       | T             | 58            | 0            | 58            | 0:02.42                         |
| 326       | T             | 58            | 0            | 58            | 0:02.47                         |
| 327       | T             | 169           | 2            | 167           | 0:06.96                         |
| 328       | T             | 58            | 0            | 58            | 0:02.44                         |
| 329       | T             | 58            | 0            | 58            | 0:02.40                         |
| 330       | T             | 169           | 2            | 167           | 0:06.95                         |
| 331       | T             | 58            | 0            | 58            | 0:02.42                         |
| 332       | T             | 58            | 0            | 58            | 0:02.44                         |
| 333       | T             | 58            | 0            | 58            | 0:02.47                         |
| 334       | T             | 169           | 2            | 167           | 0:06.93                         |
| 335       | T             | 58            | 0            | 58            | 0:02.42                         |
| 336       | T             | 58            | 0            | 58            | 0:02.41                         |
| 337       | T             | 142           | 1            | 141           | 0:05.86                         |
| 338       | T             | 58            | 0            | 58            | 0:02.41                         |
| 339       | T             | 58            | 0            | 58            | 0:02.47                         |
| 340       | T             | 58            | 0            | 58            | 0:02.42                         |
| 341       | T             | 58            | 0            | 58            | 0:02.44                         |
| 342       | T             | 58            | 0            | 58            | 0:02.38                         |
| 343       | T             | 197           | 3            | 194           | 0:08.05                         |

| <b>Id</b> | <b>Result</b> | <b>#total</b> | <b>#true</b> | <b>#false</b> | <b>Execution time (min:sec)</b> |
|-----------|---------------|---------------|--------------|---------------|---------------------------------|
| 344       | T             | 169           | 2            | 167           | 0:06.94                         |
| 345       | T             | 225           | 4            | 221           | 0:09.22                         |
| 346       | T             | 252           | 5            | 247           | 0:10.44                         |
| 347       | T             | 58            | 0            | 58            | 0:02.43                         |
| 348       | T             | 58            | 0            | 58            | 0:02.40                         |
| 349       | T             | 58            | 0            | 58            | 0:02.44                         |
| 350       | T             | 142           | 1            | 141           | 0:05.81                         |
| 351       | T             | 142           | 1            | 141           | 0:05.81                         |
| 352       | T             | 197           | 3            | 194           | 0:08.04                         |
| 353       | T             | 58            | 0            | 58            | 0:02.42                         |
| 354       | T             | 58            | 0            | 58            | 0:02.40                         |
| 355       | T             | 58            | 0            | 58            | 0:02.40                         |
| 356       | T             | 58            | 0            | 58            | 0:02.42                         |
| 357       | T             | 58            | 0            | 58            | 0:02.41                         |
| 358       | T             | 58            | 0            | 58            | 0:02.41                         |
| 359       | T             | 197           | 3            | 194           | 0:08.09                         |
| 360       | T             | 142           | 1            | 141           | 0:05.87                         |
| 361       | T             | 142           | 1            | 141           | 0:05.82                         |
| 362       | T             | 169           | 2            | 167           | 0:09.73                         |
| 363       | T             | 58            | 0            | 58            | 0:03.09                         |
| 364       | T             | 58            | 0            | 58            | 0:02.43                         |
| 365       | T             | 58            | 0            | 58            | 0:02.42                         |
| 366       | T             | 58            | 0            | 58            | 0:02.39                         |
| 367       | T             | 58            | 0            | 58            | 0:02.40                         |
| 368       | T             | 197           | 3            | 194           | 0:08.04                         |
| 369       | T             | 58            | 0            | 58            | 0:02.42                         |
| 370       | T             | 58            | 0            | 58            | 0:02.45                         |
| 371       | T             | 58            | 0            | 58            | 0:02.45                         |
| 372       | T             | 58            | 0            | 58            | 0:02.40                         |
| 373       | T             | 142           | 1            | 141           | 0:05.85                         |
| 374       | T             | 169           | 2            | 167           | 0:06.88                         |
| 375       | T             | 58            | 0            | 58            | 0:02.41                         |
| 376       | T             | 142           | 1            | 141           | 0:05.85                         |
| 377       | T             | 169           | 2            | 167           | 0:06.91                         |
| 378       | T             | 169           | 2            | 167           | 0:06.93                         |
| 379       | T             | 58            | 0            | 58            | 0:02.41                         |
| 380       | T             | 169           | 2            | 167           | 0:04.66                         |
| 381       | T             | 169           | 2            | 167           | 0:06.95                         |
| 382       | T             | 142           | 1            | 141           | 0:05.80                         |
| 383       | T             | 197           | 3            | 194           | 0:09.70                         |
| 384       | T             | 169           | 2            | 167           | 0:06.97                         |
| 385       | T             | 197           | 3            | 194           | 0:08.02                         |
| 386       | T             | 252           | 5            | 247           | 0:14.55                         |
| 387       | T             | 58            | 0            | 58            | 0:02.44                         |
| 388       | T             | 142           | 1            | 141           | 0:05.78                         |
| 389       | T             | 169           | 2            | 167           | 0:06.90                         |
| 390       | T             | 169           | 2            | 167           | 0:06.98                         |
| 391       | T             | 58            | 0            | 58            | 0:02.42                         |

| <b>Id</b> | <b>Result</b> | <b>#total</b> | <b>#true</b> | <b>#false</b> | <b>Execution time (min:sec)</b> |
|-----------|---------------|---------------|--------------|---------------|---------------------------------|
| 392       | T             | 58            | 0            | 58            | 0:02.44                         |
| 393       | T             | 142           | 1            | 141           | 0:05.80                         |
| 394       | T             | 169           | 2            | 167           | 0:07.00                         |
| 395       | T             | 58            | 0            | 58            | 0:02.44                         |
| 396       | T             | 197           | 3            | 194           | 0:08.16                         |
| 397       | T             | 58            | 0            | 58            | 0:02.43                         |
| 398       | T             | 142           | 1            | 141           | 0:05.80                         |
| 399       | T             | 225           | 4            | 221           | 0:09.29                         |
| 400       | T             | 58            | 0            | 58            | 0:02.42                         |
| 401       | T             | 169           | 2            | 167           | 0:06.95                         |
| 402       | T             | 58            | 0            | 58            | 0:02.62                         |
| 403       | T             | 58            | 0            | 58            | 0:02.46                         |
| 404       | T             | 58            | 0            | 58            | 0:02.43                         |
| 405       | T             | 58            | 0            | 58            | 0:02.48                         |
| 406       | T             | 58            | 0            | 58            | 0:02.40                         |
| 407       | T             | 142           | 1            | 141           | 0:05.86                         |
| 408       | T             | 58            | 0            | 58            | 0:02.38                         |
| 409       | T             | 142           | 1            | 141           | 0:05.85                         |
| 410       | T             | 225           | 4            | 221           | 0:09.21                         |
| 411       | T             | 58            | 0            | 58            | 0:02.44                         |
| 412       | T             | 58            | 0            | 58            | 0:02.42                         |
| 413       | T             | 58            | 0            | 58            | 0:02.39                         |
| 414       | T             | 142           | 1            | 141           | 0:06.08                         |
| 415       | T             | 58            | 0            | 58            | 0:02.39                         |
| 416       | T             | 58            | 0            | 58            | 0:02.46                         |
| 417       | T             | 58            | 0            | 58            | 0:02.40                         |
| 418       | T             | 58            | 0            | 58            | 0:02.45                         |
| 419       | T             | 58            | 0            | 58            | 0:03.80                         |
| 420       | T             | 58            | 0            | 58            | 0:02.44                         |
| 421       | T             | 169           | 2            | 167           | 0:07.22                         |
| 422       | T             | 58            | 0            | 58            | 0:02.40                         |
| 423       | T             | 142           | 1            | 141           | 0:05.04                         |
| 424       | T             | 58            | 0            | 58            | 0:02.44                         |
| 425       | T             | 58            | 0            | 58            | 0:02.44                         |
| 426       | T             | 169           | 2            | 167           | 0:06.95                         |
| 427       | T             | 58            | 0            | 58            | 0:02.45                         |
| 428       | T             | 58            | 0            | 58            | 0:02.44                         |
| 429       | T             | 142           | 1            | 141           | 0:05.85                         |
| 430       | T             | 169           | 2            | 167           | 0:06.93                         |
| 431       | T             | 58            | 0            | 58            | 0:02.40                         |
| 432       | T             | 58            | 0            | 58            | 0:02.42                         |
| 433       | T             | 58            | 0            | 58            | 0:02.43                         |
| 434       | T             | 58            | 0            | 58            | 0:02.41                         |
| 435       | T             | 58            | 0            | 58            | 0:02.42                         |
| 436       | T             | 58            | 0            | 58            | 0:02.43                         |
| 437       | T             | 58            | 0            | 58            | 0:02.43                         |
| 438       | T             | 58            | 0            | 58            | 0:02.39                         |
| 439       | T             | 58            | 0            | 58            | 0:03.71                         |

| <b>Id</b> | <b>Result</b> | <b>#total</b> | <b>#true</b> | <b>#false</b> | <b>Execution time (min:sec)</b> |
|-----------|---------------|---------------|--------------|---------------|---------------------------------|
| 440       | T             | 142           | 1            | 141           | 0:08.79                         |
| 441       | T             | 142           | 1            | 141           | 0:05.82                         |
| 442       | T             | 58            | 0            | 58            | 0:02.37                         |
| 443       | T             | 169           | 2            | 167           | 0:06.92                         |
| 444       | T             | 58            | 0            | 58            | 0:02.41                         |
| 445       | T             | 142           | 1            | 141           | 0:05.87                         |
| 446       | T             | 58            | 0            | 58            | 0:02.44                         |
| 447       | T             | 58            | 0            | 58            | 0:02.46                         |
| 448       | T             | 58            | 0            | 58            | 0:02.44                         |
| 449       | T             | 142           | 1            | 141           | 0:05.88                         |
| 450       | T             | 142           | 1            | 141           | 0:05.87                         |
| 451       | T             | 142           | 1            | 141           | 0:05.79                         |
| 452       | T             | 58            | 0            | 58            | 0:02.41                         |
| 453       | T             | 58            | 0            | 58            | 0:02.44                         |
| 454       | T             | 169           | 2            | 167           | 0:09.66                         |
| 455       | T             | 58            | 0            | 58            | 0:02.42                         |
| 456       | T             | 142           | 1            | 141           | 0:05.83                         |
| 457       | T             | 58            | 0            | 58            | 0:02.46                         |
| 458       | T             | 58            | 0            | 58            | 0:03.90                         |
| 459       | T             | 58            | 0            | 58            | 0:02.41                         |
| 460       | T             | 58            | 0            | 58            | 0:02.40                         |
| 461       | T             | 142           | 1            | 141           | 0:05.83                         |
| 462       | T             | 58            | 0            | 58            | 0:02.42                         |
| 463       | T             | 58            | 0            | 58            | 0:02.41                         |
| 464       | T             | 58            | 0            | 58            | 0:02.41                         |
| 465       | T             | 58            | 0            | 58            | 0:02.42                         |
| 466       | T             | 225           | 4            | 221           | 0:09.24                         |
| 467       | T             | 169           | 2            | 167           | 0:06.98                         |
| 468       | T             | 169           | 2            | 167           | 0:06.91                         |
| 469       | T             | 169           | 2            | 167           | 0:06.90                         |
| 470       | T             | 58            | 0            | 58            | 0:02.45                         |
| 471       | T             | 197           | 3            | 194           | 0:11.06                         |
| 472       | T             | 58            | 0            | 58            | 0:02.48                         |
| 473       | T             | 169           | 2            | 167           | 0:05.88                         |
| 474       | T             | 58            | 0            | 58            | 0:02.37                         |
| 475       | T             | 58            | 0            | 58            | 0:02.42                         |
| 476       | T             | 58            | 0            | 58            | 0:02.41                         |
| 477       | T             | 58            | 0            | 58            | 0:02.38                         |
| 478       | T             | 58            | 0            | 58            | 0:02.41                         |
| 479       | T             | 169           | 2            | 167           | 0:06.93                         |
| 480       | T             | 58            | 0            | 58            | 0:02.42                         |
| 481       | T             | 142           | 1            | 141           | 0:05.83                         |
| 482       | T             | 58            | 0            | 58            | 0:02.44                         |
| 483       | T             | 58            | 0            | 58            | 0:02.43                         |
| 484       | T             | 58            | 0            | 58            | 0:02.39                         |
| 485       | T             | 142           | 1            | 141           | 0:05.78                         |
| 486       | T             | 58            | 0            | 58            | 0:02.43                         |
| 487       | T             | 142           | 1            | 141           | 0:05.87                         |

| <b>Id</b> | <b>Result</b> | <b>#total</b> | <b>#true</b> | <b>#false</b> | <b>Execution time (min:sec)</b> |
|-----------|---------------|---------------|--------------|---------------|---------------------------------|
| 488       | T             | 169           | 2            | 167           | 0:11.26                         |
| 489       | T             | 58            | 0            | 58            | 0:02.44                         |
| 490       | T             | 58            | 0            | 58            | 0:02.39                         |
| 491       | T             | 58            | 0            | 58            | 0:02.43                         |
| 492       | T             | 169           | 2            | 167           | 0:06.94                         |
| 493       | T             | 197           | 3            | 194           | 0:08.15                         |
| 494       | T             | 58            | 0            | 58            | 0:02.43                         |
| 495       | T             | 142           | 1            | 141           | 0:05.92                         |
| 496       | T             | 58            | 0            | 58            | 0:02.41                         |
| 497       | T             | 142           | 1            | 141           | 0:05.78                         |
| 498       | T             | 58            | 0            | 58            | 0:02.42                         |
| 499       | T             | 58            | 0            | 58            | 0:02.39                         |
| 500       | T             | 58            | 0            | 58            | 0:02.41                         |

Table 3: Model checking results corresponding to logic property 3

| <b>Id</b> | <b>Result</b> | <b>#total</b> | <b>#true</b> | <b>#false</b> | <b>Execution time (min:sec)</b> |
|-----------|---------------|---------------|--------------|---------------|---------------------------------|
| 1         | T             | 58            | 58           | 0             | 0:02.46                         |
| 2         | T             | 58            | 58           | 0             | 0:02.48                         |
| 3         | T             | 58            | 58           | 0             | 0:02.48                         |
| 4         | T             | 58            | 58           | 0             | 0:02.47                         |
| 5         | T             | 58            | 58           | 0             | 0:02.46                         |
| 6         | T             | 69            | 68           | 1             | 0:02.93                         |
| 7         | T             | 69            | 68           | 1             | 0:02.91                         |
| 8         | T             | 58            | 58           | 0             | 0:02.50                         |
| 9         | T             | 58            | 58           | 0             | 0:02.49                         |
| 10        | T             | 58            | 58           | 0             | 0:02.50                         |
| 11        | T             | 83            | 81           | 2             | 0:03.50                         |
| 12        | T             | 58            | 58           | 0             | 0:02.68                         |
| 13        | T             | 58            | 58           | 0             | 0:03.79                         |
| 14        | T             | 58            | 58           | 0             | 0:02.48                         |
| 15        | T             | 58            | 58           | 0             | 0:02.51                         |
| 16        | T             | 58            | 58           | 0             | 0:02.47                         |
| 17        | T             | 58            | 58           | 0             | 0:02.53                         |
| 18        | T             | 58            | 58           | 0             | 0:02.52                         |
| 19        | T             | 58            | 58           | 0             | 0:02.55                         |
| 20        | T             | 69            | 68           | 1             | 0:02.99                         |
| 21        | T             | 58            | 58           | 0             | 0:02.46                         |
| 22        | T             | 69            | 68           | 1             | 0:02.97                         |
| 23        | T             | 69            | 68           | 1             | 0:02.95                         |
| 24        | T             | 58            | 58           | 0             | 0:02.52                         |
| 25        | T             | 58            | 58           | 0             | 0:03.48                         |
| 26        | T             | 58            | 58           | 0             | 0:02.50                         |
| 27        | T             | 58            | 58           | 0             | 0:02.56                         |
| 28        | T             | 69            | 68           | 1             | 0:02.94                         |



| <b>Id</b> | <b>Result</b> | <b>#total</b> | <b>#true</b> | <b>#false</b> | <b>Execution time (min:sec)</b> |
|-----------|---------------|---------------|--------------|---------------|---------------------------------|
| 29        | T             | 69            | 68           | 1             | 0:02.92                         |
| 30        | T             | 69            | 68           | 1             | 0:02.92                         |
| 31        | T             | 58            | 58           | 0             | 0:02.48                         |
| 32        | T             | 58            | 58           | 0             | 0:02.48                         |
| 33        | T             | 69            | 68           | 1             | 0:03.00                         |
| 34        | T             | 69            | 68           | 1             | 0:02.94                         |
| 35        | T             | 69            | 68           | 1             | 0:02.94                         |
| 36        | T             | 58            | 58           | 0             | 0:02.50                         |
| 37        | T             | 58            | 58           | 0             | 0:02.50                         |
| 38        | T             | 58            | 58           | 0             | 0:02.51                         |
| 39        | T             | 58            | 58           | 0             | 0:03.07                         |
| 40        | T             | 69            | 68           | 1             | 0:02.98                         |
| 41        | T             | 58            | 58           | 0             | 0:02.48                         |
| 42        | T             | 58            | 58           | 0             | 0:02.46                         |
| 43        | T             | 58            | 58           | 0             | 0:02.48                         |
| 44        | T             | 58            | 58           | 0             | 0:02.50                         |
| 45        | T             | 58            | 58           | 0             | 0:02.50                         |
| 46        | T             | 96            | 93           | 3             | 0:04.04                         |
| 47        | T             | 58            | 58           | 0             | 0:02.48                         |
| 48        | T             | 69            | 68           | 1             | 0:02.93                         |
| 49        | T             | 69            | 68           | 1             | 0:03.36                         |
| 50        | T             | 58            | 58           | 0             | 0:02.50                         |
| 51        | T             | 58            | 58           | 0             | 0:02.47                         |
| 52        | T             | 58            | 58           | 0             | 0:02.52                         |
| 53        | T             | 58            | 58           | 0             | 0:02.49                         |
| 54        | T             | 58            | 58           | 0             | 0:02.48                         |
| 55        | T             | 58            | 58           | 0             | 0:02.51                         |
| 56        | T             | 69            | 68           | 1             | 0:02.98                         |
| 57        | T             | 58            | 58           | 0             | 0:02.97                         |
| 58        | T             | 58            | 58           | 0             | 0:02.50                         |
| 59        | T             | 58            | 58           | 0             | 0:02.47                         |
| 60        | T             | 58            | 58           | 0             | 0:02.51                         |
| 61        | T             | 58            | 58           | 0             | 0:02.50                         |
| 62        | T             | 58            | 58           | 0             | 0:02.50                         |
| 63        | T             | 58            | 58           | 0             | 0:03.74                         |
| 64        | T             | 69            | 68           | 1             | 0:02.95                         |
| 65        | T             | 69            | 68           | 1             | 0:02.99                         |
| 66        | T             | 69            | 68           | 1             | 0:02.95                         |
| 67        | T             | 58            | 58           | 0             | 0:02.47                         |
| 68        | T             | 69            | 68           | 1             | 0:02.93                         |
| 69        | T             | 58            | 58           | 0             | 0:02.49                         |
| 70        | T             | 58            | 58           | 0             | 0:02.48                         |
| 71        | T             | 58            | 58           | 0             | 0:02.49                         |
| 72        | T             | 69            | 68           | 1             | 0:02.97                         |
| 73        | T             | 69            | 68           | 1             | 0:02.98                         |
| 74        | T             | 58            | 58           | 0             | 0:02.50                         |
| 75        | T             | 58            | 58           | 0             | 0:02.47                         |
| 76        | T             | 58            | 58           | 0             | 0:02.46                         |

| <b>Id</b> | <b>Result</b> | <b>#total</b> | <b>#true</b> | <b>#false</b> | <b>Execution time (min:sec)</b> |
|-----------|---------------|---------------|--------------|---------------|---------------------------------|
| 77        | T             | 58            | 58           | 0             | 0:02.50                         |
| 78        | T             | 58            | 58           | 0             | 0:02.52                         |
| 79        | T             | 58            | 58           | 0             | 0:02.49                         |
| 80        | T             | 58            | 58           | 0             | 0:02.48                         |
| 81        | T             | 69            | 68           | 1             | 0:02.99                         |
| 82        | T             | 69            | 68           | 1             | 0:02.98                         |
| 83        | T             | 58            | 58           | 0             | 0:02.53                         |
| 84        | T             | 69            | 68           | 1             | 0:02.99                         |
| 85        | T             | 58            | 58           | 0             | 0:02.49                         |
| 86        | T             | 58            | 58           | 0             | 0:02.48                         |
| 87        | T             | 58            | 58           | 0             | 0:02.72                         |
| 88        | T             | 69            | 68           | 1             | 0:02.95                         |
| 89        | T             | 58            | 58           | 0             | 0:02.50                         |
| 90        | T             | 58            | 58           | 0             | 0:02.46                         |
| 91        | T             | 96            | 93           | 3             | 0:04.02                         |
| 92        | T             | 58            | 58           | 0             | 0:02.45                         |
| 93        | T             | 69            | 68           | 1             | 0:02.93                         |
| 94        | T             | 69            | 68           | 1             | 0:02.92                         |
| 95        | T             | 69            | 68           | 1             | 0:03.17                         |
| 96        | T             | 69            | 68           | 1             | 0:02.94                         |
| 97        | T             | 69            | 68           | 1             | 0:02.93                         |
| 98        | T             | 83            | 81           | 2             | 0:03.55                         |
| 99        | T             | 69            | 68           | 1             | 0:02.95                         |
| 100       | T             | 69            | 68           | 1             | 0:02.95                         |
| 101       | T             | 58            | 58           | 0             | 0:02.51                         |
| 102       | T             | 69            | 68           | 1             | 0:02.95                         |
| 103       | T             | 83            | 81           | 2             | 0:03.52                         |
| 104       | T             | 69            | 68           | 1             | 0:02.91                         |
| 105       | T             | 69            | 68           | 1             | 0:02.99                         |
| 106       | T             | 58            | 58           | 0             | 0:02.49                         |
| 107       | T             | 69            | 68           | 1             | 0:02.93                         |
| 108       | T             | 58            | 58           | 0             | 0:02.45                         |
| 109       | T             | 83            | 81           | 2             | 0:03.54                         |
| 110       | T             | 69            | 68           | 1             | 0:02.95                         |
| 111       | T             | 69            | 68           | 1             | 0:02.90                         |
| 112       | T             | 69            | 68           | 1             | 0:02.92                         |
| 113       | T             | 69            | 68           | 1             | 0:02.94                         |
| 114       | T             | 58            | 58           | 0             | 0:02.50                         |
| 115       | T             | 69            | 68           | 1             | 0:02.95                         |
| 116       | T             | 58            | 58           | 0             | 0:03.08                         |
| 117       | T             | 69            | 68           | 1             | 0:02.92                         |
| 118       | T             | 69            | 68           | 1             | 0:02.92                         |
| 119       | T             | 58            | 58           | 0             | 0:02.50                         |
| 120       | T             | 58            | 58           | 0             | 0:02.46                         |
| 121       | T             | 58            | 58           | 0             | 0:02.50                         |
| 122       | T             | 58            | 58           | 0             | 0:02.49                         |
| 123       | T             | 69            | 68           | 1             | 0:02.94                         |
| 124       | T             | 58            | 58           | 0             | 0:02.47                         |

| <b>Id</b> | <b>Result</b> | <b>#total</b> | <b>#true</b> | <b>#false</b> | <b>Execution time (min:sec)</b> |
|-----------|---------------|---------------|--------------|---------------|---------------------------------|
| 125       | T             | 58            | 58           | 0             | 0:02.49                         |
| 126       | T             | 58            | 58           | 0             | 0:02.48                         |
| 127       | T             | 58            | 58           | 0             | 0:02.49                         |
| 128       | T             | 58            | 58           | 0             | 0:02.46                         |
| 129       | T             | 58            | 58           | 0             | 0:02.52                         |
| 130       | T             | 58            | 58           | 0             | 0:03.83                         |
| 131       | T             | 58            | 58           | 0             | 0:02.46                         |
| 132       | T             | 58            | 58           | 0             | 0:02.50                         |
| 133       | T             | 69            | 68           | 1             | 0:02.95                         |
| 134       | T             | 58            | 58           | 0             | 0:02.45                         |
| 135       | T             | 58            | 58           | 0             | 0:02.48                         |
| 136       | T             | 58            | 58           | 0             | 0:03.98                         |
| 137       | T             | 58            | 58           | 0             | 0:02.48                         |
| 138       | T             | 58            | 58           | 0             | 0:02.50                         |
| 139       | T             | 58            | 58           | 0             | 0:02.49                         |
| 140       | T             | 58            | 58           | 0             | 0:02.46                         |
| 141       | T             | 58            | 58           | 0             | 0:02.47                         |
| 142       | T             | 58            | 58           | 0             | 0:02.47                         |
| 143       | T             | 58            | 58           | 0             | 0:02.47                         |
| 144       | T             | 58            | 58           | 0             | 0:02.45                         |
| 145       | T             | 69            | 68           | 1             | 0:02.93                         |
| 146       | T             | 58            | 58           | 0             | 0:02.48                         |
| 147       | T             | 58            | 58           | 0             | 0:02.48                         |
| 148       | T             | 58            | 58           | 0             | 0:02.51                         |
| 149       | T             | 69            | 68           | 1             | 0:02.95                         |
| 150       | T             | 58            | 58           | 0             | 0:02.49                         |
| 151       | T             | 58            | 58           | 0             | 0:02.50                         |
| 152       | T             | 58            | 58           | 0             | 0:02.49                         |
| 153       | T             | 58            | 58           | 0             | 0:02.49                         |
| 154       | T             | 83            | 81           | 2             | 0:03.55                         |
| 155       | T             | 69            | 68           | 1             | 0:02.96                         |
| 156       | T             | 69            | 68           | 1             | 0:04.19                         |
| 157       | T             | 58            | 58           | 0             | 0:02.48                         |
| 158       | T             | 58            | 58           | 0             | 0:02.49                         |
| 159       | T             | 58            | 58           | 0             | 0:02.44                         |
| 160       | T             | 58            | 58           | 0             | 0:02.48                         |
| 161       | T             | 83            | 81           | 2             | 0:03.53                         |
| 162       | T             | 69            | 68           | 1             | 0:02.93                         |
| 163       | T             | 69            | 68           | 1             | 0:02.95                         |
| 164       | T             | 58            | 58           | 0             | 0:02.50                         |
| 165       | T             | 58            | 58           | 0             | 0:02.49                         |
| 166       | T             | 58            | 58           | 0             | 0:02.47                         |
| 167       | T             | 58            | 58           | 0             | 0:03.88                         |
| 168       | T             | 58            | 58           | 0             | 0:02.53                         |
| 169       | T             | 58            | 58           | 0             | 0:02.48                         |
| 170       | T             | 58            | 58           | 0             | 0:02.48                         |
| 171       | T             | 58            | 58           | 0             | 0:02.52                         |
| 172       | T             | 58            | 58           | 0             | 0:02.48                         |

| <b>Id</b> | <b>Result</b> | <b>#total</b> | <b>#true</b> | <b>#false</b> | <b>Execution time (min:sec)</b> |
|-----------|---------------|---------------|--------------|---------------|---------------------------------|
| 173       | T             | 69            | 68           | 1             | 0:02.92                         |
| 174       | T             | 58            | 58           | 0             | 0:02.50                         |
| 175       | T             | 58            | 58           | 0             | 0:02.49                         |
| 176       | T             | 69            | 68           | 1             | 0:02.94                         |
| 177       | T             | 58            | 58           | 0             | 0:02.52                         |
| 178       | T             | 69            | 68           | 1             | 0:02.95                         |
| 179       | T             | 69            | 68           | 1             | 0:02.96                         |
| 180       | T             | 58            | 58           | 0             | 0:02.49                         |
| 181       | T             | 58            | 58           | 0             | 0:02.47                         |
| 182       | T             | 58            | 58           | 0             | 0:02.45                         |
| 183       | T             | 69            | 68           | 1             | 0:02.94                         |
| 184       | T             | 58            | 58           | 0             | 0:02.49                         |
| 185       | T             | 69            | 68           | 1             | 0:02.96                         |
| 186       | T             | 58            | 58           | 0             | 0:02.20                         |
| 187       | T             | 58            | 58           | 0             | 0:02.47                         |
| 188       | T             | 58            | 58           | 0             | 0:02.48                         |
| 189       | T             | 58            | 58           | 0             | 0:02.47                         |
| 190       | T             | 58            | 58           | 0             | 0:02.50                         |
| 191       | T             | 58            | 58           | 0             | 0:02.45                         |
| 192       | T             | 58            | 58           | 0             | 0:02.51                         |
| 193       | T             | 58            | 58           | 0             | 0:02.48                         |
| 194       | T             | 69            | 68           | 1             | 0:02.94                         |
| 195       | T             | 69            | 68           | 1             | 0:02.82                         |
| 196       | T             | 58            | 58           | 0             | 0:02.48                         |
| 197       | T             | 58            | 58           | 0             | 0:02.50                         |
| 198       | T             | 58            | 58           | 0             | 0:02.55                         |
| 199       | T             | 58            | 58           | 0             | 0:02.47                         |
| 200       | T             | 58            | 58           | 0             | 0:02.46                         |
| 201       | T             | 58            | 58           | 0             | 0:02.46                         |
| 202       | T             | 58            | 58           | 0             | 0:02.48                         |
| 203       | T             | 58            | 58           | 0             | 0:02.51                         |
| 204       | T             | 69            | 68           | 1             | 0:04.59                         |
| 205       | T             | 58            | 58           | 0             | 0:02.51                         |
| 206       | T             | 58            | 58           | 0             | 0:02.48                         |
| 207       | T             | 69            | 68           | 1             | 0:02.99                         |
| 208       | T             | 58            | 58           | 0             | 0:02.47                         |
| 209       | T             | 58            | 58           | 0             | 0:02.49                         |
| 210       | T             | 58            | 58           | 0             | 0:02.65                         |
| 211       | T             | 69            | 68           | 1             | 0:02.93                         |
| 212       | T             | 69            | 68           | 1             | 0:02.96                         |
| 213       | T             | 58            | 58           | 0             | 0:02.47                         |
| 214       | T             | 58            | 58           | 0             | 0:02.46                         |
| 215       | T             | 58            | 58           | 0             | 0:02.48                         |
| 216       | T             | 58            | 58           | 0             | 0:02.51                         |
| 217       | T             | 58            | 58           | 0             | 0:02.49                         |
| 218       | T             | 58            | 58           | 0             | 0:02.46                         |
| 219       | T             | 83            | 81           | 2             | 0:03.57                         |
| 220       | T             | 58            | 58           | 0             | 0:02.48                         |

| <b>Id</b> | <b>Result</b> | <b>#total</b> | <b>#true</b> | <b>#false</b> | <b>Execution time (min:sec)</b> |
|-----------|---------------|---------------|--------------|---------------|---------------------------------|
| 221       | T             | 58            | 58           | 0             | 0:02.47                         |
| 222       | T             | 58            | 58           | 0             | 0:02.48                         |
| 223       | T             | 69            | 68           | 1             | 0:02.89                         |
| 224       | T             | 69            | 68           | 1             | 0:02.93                         |
| 225       | T             | 69            | 68           | 1             | 0:02.94                         |
| 226       | T             | 69            | 68           | 1             | 0:02.97                         |
| 227       | T             | 58            | 58           | 0             | 0:02.49                         |
| 228       | T             | 69            | 68           | 1             | 0:02.92                         |
| 229       | T             | 58            | 58           | 0             | 0:02.49                         |
| 230       | T             | 69            | 68           | 1             | 0:02.94                         |
| 231       | T             | 58            | 58           | 0             | 0:02.50                         |
| 232       | T             | 58            | 58           | 0             | 0:02.48                         |
| 233       | T             | 69            | 68           | 1             | 0:02.92                         |
| 234       | T             | 58            | 58           | 0             | 0:02.47                         |
| 235       | T             | 69            | 68           | 1             | 0:02.96                         |
| 236       | T             | 58            | 58           | 0             | 0:02.53                         |
| 237       | T             | 58            | 58           | 0             | 0:02.87                         |
| 238       | T             | 58            | 58           | 0             | 0:02.49                         |
| 239       | T             | 83            | 81           | 2             | 0:03.51                         |
| 240       | T             | 58            | 58           | 0             | 0:02.46                         |
| 241       | T             | 58            | 58           | 0             | 0:02.47                         |
| 242       | T             | 58            | 58           | 0             | 0:02.49                         |
| 243       | T             | 58            | 58           | 0             | 0:03.83                         |
| 244       | T             | 58            | 58           | 0             | 0:02.51                         |
| 245       | T             | 83            | 81           | 2             | 0:03.56                         |
| 246       | T             | 58            | 58           | 0             | 0:02.44                         |
| 247       | T             | 58            | 58           | 0             | 0:02.47                         |
| 248       | T             | 58            | 58           | 0             | 0:02.48                         |
| 249       | T             | 58            | 58           | 0             | 0:02.52                         |
| 250       | T             | 58            | 58           | 0             | 0:02.49                         |
| 251       | T             | 69            | 68           | 1             | 0:02.95                         |
| 252       | T             | 58            | 58           | 0             | 0:02.45                         |
| 253       | T             | 69            | 68           | 1             | 0:02.96                         |
| 254       | T             | 58            | 58           | 0             | 0:02.46                         |
| 255       | T             | 58            | 58           | 0             | 0:02.49                         |
| 256       | T             | 58            | 58           | 0             | 0:02.49                         |
| 257       | T             | 58            | 58           | 0             | 0:02.46                         |
| 258       | T             | 58            | 58           | 0             | 0:02.48                         |
| 259       | T             | 69            | 68           | 1             | 0:02.93                         |
| 260       | T             | 69            | 68           | 1             | 0:02.98                         |
| 261       | T             | 83            | 81           | 2             | 0:03.52                         |
| 262       | T             | 58            | 58           | 0             | 0:02.58                         |
| 263       | T             | 58            | 58           | 0             | 0:02.47                         |
| 264       | T             | 58            | 58           | 0             | 0:02.46                         |
| 265       | T             | 58            | 58           | 0             | 0:02.46                         |
| 266       | T             | 58            | 58           | 0             | 0:02.50                         |
| 267       | T             | 58            | 58           | 0             | 0:02.50                         |
| 268       | T             | 58            | 58           | 0             | 0:02.51                         |

| <b>Id</b> | <b>Result</b> | <b>#total</b> | <b>#true</b> | <b>#false</b> | <b>Execution time (min:sec)</b> |
|-----------|---------------|---------------|--------------|---------------|---------------------------------|
| 269       | T             | 58            | 58           | 0             | 0:02.46                         |
| 270       | T             | 58            | 58           | 0             | 0:02.47                         |
| 271       | T             | 58            | 58           | 0             | 0:03.04                         |
| 272       | T             | 58            | 58           | 0             | 0:02.51                         |
| 273       | T             | 58            | 58           | 0             | 0:02.47                         |
| 274       | T             | 58            | 58           | 0             | 0:02.48                         |
| 275       | T             | 69            | 68           | 1             | 0:02.97                         |
| 276       | T             | 69            | 68           | 1             | 0:02.92                         |
| 277       | T             | 83            | 81           | 2             | 0:03.52                         |
| 278       | T             | 58            | 58           | 0             | 0:02.48                         |
| 279       | T             | 58            | 58           | 0             | 0:02.45                         |
| 280       | T             | 69            | 68           | 1             | 0:02.98                         |
| 281       | T             | 58            | 58           | 0             | 0:02.52                         |
| 282       | T             | 58            | 58           | 0             | 0:02.46                         |
| 283       | T             | 58            | 58           | 0             | 0:02.50                         |
| 284       | T             | 58            | 58           | 0             | 0:02.48                         |
| 285       | T             | 69            | 68           | 1             | 0:02.94                         |
| 286       | T             | 83            | 81           | 2             | 0:03.60                         |
| 287       | T             | 58            | 58           | 0             | 0:02.47                         |
| 288       | T             | 58            | 58           | 0             | 0:02.72                         |
| 289       | T             | 58            | 58           | 0             | 0:03.15                         |
| 290       | T             | 96            | 93           | 3             | 0:04.14                         |
| 291       | T             | 58            | 58           | 0             | 0:02.52                         |
| 292       | T             | 58            | 58           | 0             | 0:02.46                         |
| 293       | T             | 58            | 58           | 0             | 0:02.47                         |
| 294       | T             | 69            | 68           | 1             | 0:02.93                         |
| 295       | T             | 83            | 81           | 2             | 0:03.53                         |
| 296       | T             | 96            | 93           | 3             | 0:04.10                         |
| 297       | T             | 58            | 58           | 0             | 0:02.47                         |
| 298       | T             | 58            | 58           | 0             | 0:02.51                         |
| 299       | T             | 58            | 58           | 0             | 0:02.48                         |
| 300       | T             | 58            | 58           | 0             | 0:02.48                         |
| 301       | T             | 58            | 58           | 0             | 0:02.45                         |
| 302       | T             | 58            | 58           | 0             | 0:02.54                         |
| 303       | T             | 58            | 58           | 0             | 0:02.53                         |
| 304       | T             | 58            | 58           | 0             | 0:04.01                         |
| 305       | T             | 69            | 68           | 1             | 0:03.00                         |
| 306       | T             | 110           | 106          | 4             | 0:04.74                         |
| 307       | T             | 69            | 68           | 1             | 0:02.95                         |
| 308       | T             | 58            | 58           | 0             | 0:02.47                         |
| 309       | T             | 58            | 58           | 0             | 0:02.48                         |
| 310       | T             | 58            | 58           | 0             | 0:02.46                         |
| 311       | T             | 58            | 58           | 0             | 0:02.47                         |
| 312       | T             | 69            | 68           | 1             | 0:02.94                         |
| 313       | T             | 58            | 58           | 0             | 0:02.47                         |
| 314       | T             | 58            | 58           | 0             | 0:02.50                         |
| 315       | T             | 58            | 58           | 0             | 0:02.47                         |
| 316       | T             | 58            | 58           | 0             | 0:02.48                         |

| <b>Id</b> | <b>Result</b> | <b>#total</b> | <b>#true</b> | <b>#false</b> | <b>Execution time (min:sec)</b> |
|-----------|---------------|---------------|--------------|---------------|---------------------------------|
| 317       | T             | 58            | 58           | 0             | 0:02.47                         |
| 318       | T             | 58            | 58           | 0             | 0:02.47                         |
| 319       | T             | 58            | 58           | 0             | 0:02.46                         |
| 320       | T             | 58            | 58           | 0             | 0:02.45                         |
| 321       | T             | 83            | 81           | 2             | 0:03.53                         |
| 322       | T             | 69            | 68           | 1             | 0:02.96                         |
| 323       | T             | 69            | 68           | 1             | 0:02.96                         |
| 324       | T             | 69            | 68           | 1             | 0:02.96                         |
| 325       | T             | 83            | 81           | 2             | 0:03.54                         |
| 326       | T             | 69            | 68           | 1             | 0:02.91                         |
| 327       | T             | 58            | 58           | 0             | 0:02.50                         |
| 328       | T             | 58            | 58           | 0             | 0:02.47                         |
| 329       | T             | 58            | 58           | 0             | 0:03.64                         |
| 330       | T             | 58            | 58           | 0             | 0:02.49                         |
| 331       | T             | 69            | 68           | 1             | 0:02.98                         |
| 332       | T             | 58            | 58           | 0             | 0:02.46                         |
| 333       | T             | 58            | 58           | 0             | 0:02.51                         |
| 334       | T             | 58            | 58           | 0             | 0:02.49                         |
| 335       | T             | 58            | 58           | 0             | 0:02.51                         |
| 336       | T             | 69            | 68           | 1             | 0:02.96                         |
| 337       | T             | 58            | 58           | 0             | 0:02.51                         |
| 338       | T             | 58            | 58           | 0             | 0:02.50                         |
| 339       | T             | 58            | 58           | 0             | 0:02.46                         |
| 340       | T             | 58            | 58           | 0             | 0:02.49                         |
| 341       | T             | 58            | 58           | 0             | 0:02.54                         |
| 342       | T             | 58            | 58           | 0             | 0:02.45                         |
| 343       | T             | 69            | 68           | 1             | 0:03.47                         |
| 344       | T             | 69            | 68           | 1             | 0:02.99                         |
| 345       | T             | 58            | 58           | 0             | 0:02.48                         |
| 346       | T             | 58            | 58           | 0             | 0:02.50                         |
| 347       | T             | 58            | 58           | 0             | 0:02.46                         |
| 348       | T             | 96            | 93           | 3             | 0:04.12                         |
| 349       | T             | 58            | 58           | 0             | 0:02.49                         |
| 350       | T             | 69            | 68           | 1             | 0:02.96                         |
| 351       | T             | 69            | 68           | 1             | 0:02.93                         |
| 352       | T             | 58            | 58           | 0             | 0:02.46                         |
| 353       | T             | 83            | 81           | 2             | 0:04.99                         |
| 354       | T             | 69            | 68           | 1             | 0:02.92                         |
| 355       | T             | 83            | 81           | 2             | 0:03.53                         |
| 356       | T             | 58            | 58           | 0             | 0:02.47                         |
| 357       | T             | 58            | 58           | 0             | 0:02.52                         |
| 358       | T             | 69            | 68           | 1             | 0:02.94                         |
| 359       | T             | 69            | 68           | 1             | 0:02.95                         |
| 360       | T             | 58            | 58           | 0             | 0:02.45                         |
| 361       | T             | 69            | 68           | 1             | 0:02.95                         |
| 362       | T             | 58            | 58           | 0             | 0:02.46                         |
| 363       | T             | 58            | 58           | 0             | 0:02.48                         |
| 364       | T             | 58            | 58           | 0             | 0:02.47                         |

| <b>Id</b> | <b>Result</b> | <b>#total</b> | <b>#true</b> | <b>#false</b> | <b>Execution time (min:sec)</b> |
|-----------|---------------|---------------|--------------|---------------|---------------------------------|
| 365       | T             | 58            | 58           | 0             | 0:02.47                         |
| 366       | T             | 69            | 68           | 1             | 0:02.92                         |
| 367       | T             | 69            | 68           | 1             | 0:02.92                         |
| 368       | T             | 58            | 58           | 0             | 0:03.84                         |
| 369       | T             | 58            | 58           | 0             | 0:02.50                         |
| 370       | T             | 69            | 68           | 1             | 0:02.94                         |
| 371       | T             | 83            | 81           | 2             | 0:03.52                         |
| 372       | T             | 69            | 68           | 1             | 0:02.95                         |
| 373       | T             | 58            | 58           | 0             | 0:02.47                         |
| 374       | T             | 96            | 93           | 3             | 0:04.05                         |
| 375       | T             | 69            | 68           | 1             | 0:02.91                         |
| 376       | T             | 69            | 68           | 1             | 0:02.93                         |
| 377       | T             | 69            | 68           | 1             | 0:02.93                         |
| 378       | T             | 58            | 58           | 0             | 0:02.49                         |
| 379       | T             | 58            | 58           | 0             | 0:02.52                         |
| 380       | T             | 58            | 58           | 0             | 0:02.46                         |
| 381       | T             | 69            | 68           | 1             | 0:02.98                         |
| 382       | T             | 58            | 58           | 0             | 0:02.51                         |
| 383       | T             | 69            | 68           | 1             | 0:02.91                         |
| 384       | T             | 58            | 58           | 0             | 0:02.49                         |
| 385       | T             | 58            | 58           | 0             | 0:02.46                         |
| 386       | T             | 58            | 58           | 0             | 0:02.50                         |
| 387       | T             | 69            | 68           | 1             | 0:02.92                         |
| 388       | T             | 58            | 58           | 0             | 0:02.46                         |
| 389       | T             | 58            | 58           | 0             | 0:02.47                         |
| 390       | T             | 69            | 68           | 1             | 0:02.95                         |
| 391       | T             | 83            | 81           | 2             | 0:03.51                         |
| 392       | T             | 58            | 58           | 0             | 0:02.50                         |
| 393       | T             | 83            | 81           | 2             | 0:03.51                         |
| 394       | T             | 58            | 58           | 0             | 0:02.48                         |
| 395       | T             | 83            | 81           | 2             | 0:03.52                         |
| 396       | T             | 69            | 68           | 1             | 0:02.97                         |
| 397       | T             | 83            | 81           | 2             | 0:04.57                         |
| 398       | T             | 58            | 58           | 0             | 0:03.39                         |
| 399       | T             | 69            | 68           | 1             | 0:02.92                         |
| 400       | T             | 69            | 68           | 1             | 0:02.94                         |
| 401       | T             | 69            | 68           | 1             | 0:02.93                         |
| 402       | T             | 58            | 58           | 0             | 0:02.45                         |
| 403       | T             | 69            | 68           | 1             | 0:04.81                         |
| 404       | T             | 69            | 68           | 1             | 0:02.91                         |
| 405       | T             | 69            | 68           | 1             | 0:02.92                         |
| 406       | T             | 58            | 58           | 0             | 0:02.47                         |
| 407       | T             | 58            | 58           | 0             | 0:02.46                         |
| 408       | T             | 58            | 58           | 0             | 0:02.49                         |
| 409       | T             | 69            | 68           | 1             | 0:02.95                         |
| 410       | T             | 58            | 58           | 0             | 0:02.50                         |
| 411       | T             | 69            | 68           | 1             | 0:02.91                         |
| 412       | T             | 58            | 58           | 0             | 0:02.46                         |



| <b>Id</b> | <b>Result</b> | <b>#total</b> | <b>#true</b> | <b>#false</b> | <b>Execution time (min:sec)</b> |
|-----------|---------------|---------------|--------------|---------------|---------------------------------|
| 413       | T             | 69            | 68           | 1             | 0:02.97                         |
| 414       | T             | 58            | 58           | 0             | 0:02.49                         |
| 415       | T             | 58            | 58           | 0             | 0:02.49                         |
| 416       | T             | 58            | 58           | 0             | 0:04.08                         |
| 417       | T             | 69            | 68           | 1             | 0:02.94                         |
| 418       | T             | 69            | 68           | 1             | 0:02.93                         |
| 419       | T             | 58            | 58           | 0             | 0:02.49                         |
| 420       | T             | 58            | 58           | 0             | 0:02.46                         |
| 421       | T             | 69            | 68           | 1             | 0:02.97                         |
| 422       | T             | 58            | 58           | 0             | 0:02.48                         |
| 423       | T             | 58            | 58           | 0             | 0:02.45                         |
| 424       | T             | 83            | 81           | 2             | 0:03.52                         |
| 425       | T             | 58            | 58           | 0             | 0:02.48                         |
| 426       | T             | 58            | 58           | 0             | 0:02.48                         |
| 427       | T             | 58            | 58           | 0             | 0:04.04                         |
| 428       | T             | 58            | 58           | 0             | 0:02.49                         |
| 429       | T             | 69            | 68           | 1             | 0:02.97                         |
| 430       | T             | 58            | 58           | 0             | 0:02.52                         |
| 431       | T             | 58            | 58           | 0             | 0:02.51                         |
| 432       | T             | 69            | 68           | 1             | 0:02.96                         |
| 433       | T             | 58            | 58           | 0             | 0:02.49                         |
| 434       | T             | 58            | 58           | 0             | 0:02.49                         |
| 435       | T             | 58            | 58           | 0             | 0:02.68                         |
| 436       | T             | 58            | 58           | 0             | 0:02.48                         |
| 437       | T             | 58            | 58           | 0             | 0:02.48                         |
| 438       | T             | 83            | 81           | 2             | 0:03.51                         |
| 439       | T             | 58            | 58           | 0             | 0:02.50                         |
| 440       | T             | 58            | 58           | 0             | 0:02.48                         |
| 441       | T             | 58            | 58           | 0             | 0:02.47                         |
| 442       | T             | 69            | 68           | 1             | 0:02.97                         |
| 443       | T             | 58            | 58           | 0             | 0:02.47                         |
| 444       | T             | 58            | 58           | 0             | 0:02.48                         |
| 445       | T             | 69            | 68           | 1             | 0:02.97                         |
| 446       | T             | 58            | 58           | 0             | 0:02.51                         |
| 447       | T             | 58            | 58           | 0             | 0:02.48                         |
| 448       | T             | 69            | 68           | 1             | 0:02.92                         |
| 449       | T             | 58            | 58           | 0             | 0:02.47                         |
| 450       | T             | 58            | 58           | 0             | 0:02.43                         |
| 451       | T             | 58            | 58           | 0             | 0:02.48                         |
| 452       | T             | 96            | 93           | 3             | 0:04.10                         |
| 453       | T             | 69            | 68           | 1             | 0:02.89                         |
| 454       | T             | 58            | 58           | 0             | 0:02.50                         |
| 455       | T             | 58            | 58           | 0             | 0:02.48                         |
| 456       | T             | 69            | 68           | 1             | 0:02.94                         |
| 457       | T             | 58            | 58           | 0             | 0:02.49                         |
| 458       | T             | 69            | 68           | 1             | 0:02.96                         |
| 459       | T             | 58            | 58           | 0             | 0:02.48                         |
| 460       | T             | 69            | 68           | 1             | 0:02.94                         |

| <b>Id</b> | <b>Result</b> | <b>#total</b> | <b>#true</b> | <b>#false</b> | <b>Execution time (min:sec)</b> |
|-----------|---------------|---------------|--------------|---------------|---------------------------------|
| 461       | T             | 58            | 58           | 0             | 0:02.48                         |
| 462       | T             | 58            | 58           | 0             | 0:02.48                         |
| 463       | T             | 69            | 68           | 1             | 0:02.96                         |
| 464       | T             | 69            | 68           | 1             | 0:02.97                         |
| 465       | T             | 58            | 58           | 0             | 0:02.51                         |
| 466       | T             | 58            | 58           | 0             | 0:02.50                         |
| 467       | T             | 58            | 58           | 0             | 0:02.48                         |
| 468       | T             | 69            | 68           | 1             | 0:02.93                         |
| 469       | T             | 58            | 58           | 0             | 0:02.46                         |
| 470       | T             | 58            | 58           | 0             | 0:02.48                         |
| 471       | T             | 83            | 81           | 2             | 0:03.52                         |
| 472       | T             | 58            | 58           | 0             | 0:02.52                         |
| 473       | T             | 58            | 58           | 0             | 0:02.49                         |
| 474       | T             | 58            | 58           | 0             | 0:02.44                         |
| 475       | T             | 58            | 58           | 0             | 0:02.50                         |
| 476       | T             | 58            | 58           | 0             | 0:02.48                         |
| 477       | T             | 58            | 58           | 0             | 0:02.52                         |
| 478       | T             | 58            | 58           | 0             | 0:02.67                         |
| 479       | T             | 58            | 58           | 0             | 0:03.54                         |
| 480       | T             | 83            | 81           | 2             | 0:03.48                         |
| 481       | T             | 58            | 58           | 0             | 0:02.49                         |
| 482       | T             | 58            | 58           | 0             | 0:02.49                         |
| 483       | T             | 58            | 58           | 0             | 0:02.48                         |
| 484       | T             | 58            | 58           | 0             | 0:03.06                         |
| 485       | T             | 58            | 58           | 0             | 0:02.50                         |
| 486       | T             | 96            | 93           | 3             | 0:02.55                         |
| 487       | T             | 58            | 58           | 0             | 0:02.47                         |
| 488       | T             | 58            | 58           | 0             | 0:02.51                         |
| 489       | T             | 58            | 58           | 0             | 0:02.50                         |
| 490       | T             | 69            | 68           | 1             | 0:02.92                         |
| 491       | T             | 58            | 58           | 0             | 0:02.52                         |
| 492       | T             | 69            | 68           | 1             | 0:02.91                         |
| 493       | T             | 58            | 58           | 0             | 0:02.54                         |
| 494       | T             | 58            | 58           | 0             | 0:02.49                         |
| 495       | T             | 58            | 58           | 0             | 0:02.46                         |
| 496       | T             | 96            | 93           | 3             | 0:04.06                         |
| 497       | T             | 58            | 58           | 0             | 0:02.44                         |
| 498       | T             | 58            | 58           | 0             | 0:02.51                         |
| 499       | T             | 58            | 58           | 0             | 0:02.48                         |
| 500       | T             | 58            | 58           | 0             | 0:02.85                         |

Table 4: Model checking results corresponding to logic property 4

| <b>Id</b> | <b>Result</b> | <b>#total</b> | <b>#true</b> | <b>#false</b> | <b>Execution time (min:sec)</b> |
|-----------|---------------|---------------|--------------|---------------|---------------------------------|
| 1         | T             | 3             | 2            | 1             | 0:00.46                         |

| <b>Id</b> | <b>Result</b> | <b>#total</b> | <b>#true</b> | <b>#false</b> | <b>Execution time (min:sec)</b> |
|-----------|---------------|---------------|--------------|---------------|---------------------------------|
| 2         | T             | 3             | 2            | 1             | 0:00.19                         |
| 3         | F             | 8             | 0            | 8             | 0:00.64                         |
| 4         | F             | 8             | 0            | 8             | 0:00.42                         |
| 5         | T             | 2             | 1            | 1             | 0:00.20                         |
| 6         | T             | 2             | 1            | 1             | 0:00.15                         |
| 7         | T             | 2             | 1            | 1             | 0:00.15                         |
| 8         | T             | 2             | 1            | 1             | 0:00.16                         |
| 9         | T             | 2             | 1            | 1             | 0:00.15                         |
| 10        | T             | 2             | 1            | 1             | 0:00.15                         |
| 11        | T             | 2             | 1            | 1             | 0:00.18                         |
| 12        | T             | 2             | 1            | 1             | 0:00.15                         |
| 13        | T             | 2             | 1            | 1             | 0:00.14                         |
| 14        | T             | 2             | 1            | 1             | 0:00.14                         |
| 15        | T             | 2             | 1            | 1             | 0:00.15                         |
| 16        | T             | 2             | 1            | 1             | 0:00.14                         |
| 17        | T             | 2             | 1            | 1             | 0:00.19                         |
| 18        | T             | 2             | 1            | 1             | 0:00.16                         |
| 19        | T             | 2             | 1            | 1             | 0:00.15                         |
| 20        | T             | 2             | 1            | 1             | 0:00.15                         |
| 21        | T             | 2             | 1            | 1             | 0:00.15                         |
| 22        | T             | 4             | 1            | 3             | 0:00.29                         |
| 23        | T             | 4             | 1            | 3             | 0:00.22                         |
| 24        | T             | 4             | 1            | 3             | 0:00.24                         |
| 25        | T             | 4             | 1            | 3             | 0:00.23                         |
| 26        | T             | 3             | 1            | 2             | 0:00.25                         |
| 27        | T             | 3             | 1            | 2             | 0:00.20                         |
| 28        | T             | 3             | 1            | 2             | 0:00.19                         |
| 29        | T             | 3             | 1            | 2             | 0:00.18                         |
| 30        | T             | 3             | 1            | 2             | 0:00.19                         |
| 31        | T             | 3             | 2            | 1             | 0:00.23                         |
| 32        | T             | 3             | 2            | 1             | 0:00.19                         |
| 33        | T             | 3             | 2            | 1             | 0:00.19                         |
| 34        | T             | 3             | 2            | 1             | 0:00.18                         |
| 35        | T             | 3             | 2            | 1             | 0:00.18                         |
| 36        | T             | 2             | 1            | 1             | 0:00.27                         |
| 37        | T             | 2             | 1            | 1             | 0:00.15                         |
| 38        | T             | 2             | 1            | 1             | 0:00.16                         |
| 39        | T             | 2             | 1            | 1             | 0:00.15                         |
| 40        | T             | 2             | 1            | 1             | 0:00.15                         |
| 41        | T             | 3             | 2            | 1             | 0:00.29                         |
| 42        | T             | 3             | 2            | 1             | 0:00.20                         |
| 43        | T             | 3             | 2            | 1             | 0:00.19                         |
| 44        | T             | 3             | 2            | 1             | 0:00.21                         |
| 45        | T             | 2             | 1            | 1             | 0:00.19                         |
| 46        | T             | 2             | 1            | 1             | 0:00.14                         |
| 47        | T             | 2             | 1            | 1             | 0:00.14                         |
| 48        | T             | 2             | 1            | 1             | 0:00.14                         |
| 49        | T             | 2             | 1            | 1             | 0:00.13                         |

| <b>Id</b> | <b>Result</b> | <b>#total</b> | <b>#true</b> | <b>#false</b> | <b>Execution time (min:sec)</b> |
|-----------|---------------|---------------|--------------|---------------|---------------------------------|
| 50        | T             | 2             | 1            | 1             | 0:00.15                         |
| 51        | T             | 3             | 1            | 2             | 0:00.23                         |
| 52        | T             | 3             | 1            | 2             | 0:00.19                         |
| 53        | T             | 3             | 1            | 2             | 0:00.18                         |
| 54        | T             | 3             | 1            | 2             | 0:00.20                         |
| 55        | T             | 3             | 1            | 2             | 0:00.18                         |
| 56        | T             | 3             | 2            | 1             | 0:00.22                         |
| 57        | T             | 3             | 2            | 1             | 0:00.18                         |
| 58        | T             | 3             | 2            | 1             | 0:00.20                         |
| 59        | T             | 3             | 2            | 1             | 0:00.18                         |
| 60        | T             | 3             | 2            | 1             | 0:00.18                         |
| 61        | T             | 5             | 5            | 0             | 0:00.36                         |
| 62        | T             | 5             | 5            | 0             | 0:00.28                         |
| 63        | T             | 5             | 5            | 0             | 0:00.28                         |
| 64        | T             | 2             | 1            | 1             | 0:00.20                         |
| 65        | T             | 2             | 1            | 1             | 0:00.13                         |
| 66        | T             | 2             | 1            | 1             | 0:00.14                         |
| 67        | T             | 2             | 1            | 1             | 0:00.13                         |
| 68        | T             | 2             | 1            | 1             | 0:00.14                         |
| 69        | T             | 2             | 1            | 1             | 0:00.15                         |
| 70        | T             | 5             | 1            | 4             | 0:00.35                         |
| 71        | T             | 5             | 1            | 4             | 0:00.29                         |
| 72        | T             | 5             | 1            | 4             | 0:00.29                         |
| 73        | T             | 4             | 1            | 3             | 0:00.28                         |
| 74        | T             | 4             | 1            | 3             | 0:00.24                         |
| 75        | T             | 4             | 1            | 3             | 0:00.23                         |
| 76        | T             | 4             | 1            | 3             | 0:00.24                         |
| 77        | T             | 5             | 5            | 0             | 0:00.40                         |
| 78        | T             | 5             | 5            | 0             | 0:00.27                         |
| 79        | T             | 5             | 5            | 0             | 0:00.27                         |
| 80        | T             | 3             | 2            | 1             | 0:00.26                         |
| 81        | T             | 3             | 2            | 1             | 0:00.21                         |
| 82        | T             | 3             | 2            | 1             | 0:00.20                         |
| 83        | T             | 3             | 2            | 1             | 0:00.18                         |
| 84        | T             | 3             | 2            | 1             | 0:00.21                         |
| 85        | T             | 2             | 1            | 1             | 0:00.18                         |
| 86        | T             | 2             | 1            | 1             | 0:00.16                         |
| 87        | T             | 2             | 1            | 1             | 0:00.15                         |
| 88        | T             | 2             | 1            | 1             | 0:00.16                         |
| 89        | T             | 2             | 1            | 1             | 0:00.15                         |
| 90        | T             | 3             | 1            | 2             | 0:00.23                         |
| 91        | T             | 3             | 1            | 2             | 0:00.19                         |
| 92        | T             | 3             | 1            | 2             | 0:00.19                         |
| 93        | T             | 3             | 1            | 2             | 0:00.19                         |
| 94        | T             | 3             | 1            | 2             | 0:00.19                         |
| 95        | T             | 2             | 1            | 1             | 0:00.18                         |
| 96        | T             | 2             | 1            | 1             | 0:00.14                         |
| 97        | T             | 2             | 1            | 1             | 0:00.13                         |

| <b>Id</b> | <b>Result</b> | <b>#total</b> | <b>#true</b> | <b>#false</b> | <b>Execution time (min:sec)</b> |
|-----------|---------------|---------------|--------------|---------------|---------------------------------|
| 98        | T             | 2             | 1            | 1             | 0:00.15                         |
| 99        | T             | 2             | 1            | 1             | 0:00.14                         |
| 100       | T             | 2             | 1            | 1             | 0:00.15                         |
| 101       | T             | 3             | 2            | 1             | 0:00.27                         |
| 102       | T             | 3             | 2            | 1             | 0:00.19                         |
| 103       | T             | 3             | 2            | 1             | 0:00.19                         |
| 104       | T             | 3             | 2            | 1             | 0:00.19                         |
| 105       | T             | 2             | 1            | 1             | 0:00.17                         |
| 106       | T             | 2             | 1            | 1             | 0:00.15                         |
| 107       | T             | 2             | 1            | 1             | 0:00.15                         |
| 108       | T             | 2             | 1            | 1             | 0:00.15                         |
| 109       | T             | 2             | 1            | 1             | 0:00.15                         |
| 110       | T             | 2             | 1            | 1             | 0:00.16                         |
| 111       | T             | 4             | 1            | 3             | 0:00.34                         |
| 112       | T             | 4             | 1            | 3             | 0:00.22                         |
| 113       | T             | 4             | 1            | 3             | 0:00.24                         |
| 114       | T             | 4             | 1            | 3             | 0:00.24                         |
| 115       | T             | 3             | 1            | 2             | 0:00.23                         |
| 116       | T             | 3             | 1            | 2             | 0:00.20                         |
| 117       | T             | 3             | 1            | 2             | 0:00.20                         |
| 118       | T             | 3             | 1            | 2             | 0:00.19                         |
| 119       | T             | 2             | 1            | 1             | 0:00.18                         |
| 120       | T             | 2             | 1            | 1             | 0:00.16                         |
| 121       | T             | 2             | 1            | 1             | 0:00.16                         |
| 122       | T             | 2             | 1            | 1             | 0:00.14                         |
| 123       | T             | 2             | 1            | 1             | 0:00.15                         |
| 124       | T             | 2             | 1            | 1             | 0:00.15                         |
| 125       | T             | 2             | 1            | 1             | 0:00.23                         |
| 126       | T             | 2             | 1            | 1             | 0:00.15                         |
| 127       | T             | 2             | 1            | 1             | 0:00.16                         |
| 128       | T             | 2             | 1            | 1             | 0:00.15                         |
| 129       | T             | 2             | 1            | 1             | 0:00.14                         |
| 130       | T             | 2             | 1            | 1             | 0:00.15                         |
| 131       | T             | 3             | 1            | 2             | 0:00.23                         |
| 132       | T             | 3             | 1            | 2             | 0:00.19                         |
| 133       | T             | 3             | 1            | 2             | 0:00.18                         |
| 134       | T             | 3             | 1            | 2             | 0:00.18                         |
| 135       | T             | 3             | 1            | 2             | 0:00.19                         |
| 136       | T             | 2             | 1            | 1             | 0:00.17                         |
| 137       | T             | 2             | 1            | 1             | 0:00.16                         |
| 138       | T             | 2             | 1            | 1             | 0:00.15                         |
| 139       | T             | 2             | 1            | 1             | 0:00.15                         |
| 140       | T             | 2             | 1            | 1             | 0:00.15                         |
| 141       | T             | 2             | 1            | 1             | 0:00.15                         |
| 142       | T             | 2             | 1            | 1             | 0:00.21                         |
| 143       | T             | 2             | 1            | 1             | 0:00.15                         |
| 144       | T             | 2             | 1            | 1             | 0:00.14                         |
| 145       | T             | 2             | 1            | 1             | 0:00.15                         |

| <b>Id</b> | <b>Result</b> | <b>#total</b> | <b>#true</b> | <b>#false</b> | <b>Execution time (min:sec)</b> |
|-----------|---------------|---------------|--------------|---------------|---------------------------------|
| 146       | T             | 2             | 1            | 1             | 0:00.14                         |
| 147       | T             | 4             | 3            | 1             | 0:00.31                         |
| 148       | T             | 4             | 3            | 1             | 0:00.24                         |
| 149       | T             | 4             | 3            | 1             | 0:00.23                         |
| 150       | T             | 4             | 3            | 1             | 0:00.25                         |
| 151       | T             | 5             | 4            | 1             | 0:00.33                         |
| 152       | T             | 5             | 4            | 1             | 0:00.27                         |
| 153       | T             | 5             | 4            | 1             | 0:00.26                         |
| 154       | T             | 4             | 3            | 1             | 0:00.27                         |
| 155       | T             | 4             | 3            | 1             | 0:00.23                         |
| 156       | T             | 4             | 3            | 1             | 0:00.23                         |
| 157       | T             | 4             | 3            | 1             | 0:00.24                         |
| 158       | T             | 3             | 1            | 2             | 0:00.22                         |
| 159       | T             | 3             | 1            | 2             | 0:00.21                         |
| 160       | T             | 3             | 1            | 2             | 0:00.19                         |
| 161       | T             | 3             | 1            | 2             | 0:00.18                         |
| 162       | T             | 3             | 1            | 2             | 0:00.19                         |
| 163       | T             | 2             | 1            | 1             | 0:00.18                         |
| 164       | T             | 2             | 1            | 1             | 0:00.16                         |
| 165       | T             | 2             | 1            | 1             | 0:00.15                         |
| 166       | T             | 2             | 1            | 1             | 0:00.15                         |
| 167       | T             | 2             | 1            | 1             | 0:00.14                         |
| 168       | T             | 2             | 1            | 1             | 0:00.15                         |
| 169       | T             | 3             | 2            | 1             | 0:00.24                         |
| 170       | T             | 3             | 2            | 1             | 0:00.19                         |
| 171       | T             | 3             | 2            | 1             | 0:00.21                         |
| 172       | T             | 3             | 2            | 1             | 0:00.18                         |
| 173       | T             | 3             | 2            | 1             | 0:00.19                         |
| 174       | T             | 2             | 1            | 1             | 0:00.19                         |
| 175       | T             | 2             | 1            | 1             | 0:00.14                         |
| 176       | T             | 2             | 1            | 1             | 0:00.15                         |
| 177       | T             | 2             | 1            | 1             | 0:00.14                         |
| 178       | T             | 2             | 1            | 1             | 0:00.15                         |
| 179       | T             | 3             | 2            | 1             | 0:00.23                         |
| 180       | T             | 3             | 2            | 1             | 0:00.19                         |
| 181       | T             | 3             | 2            | 1             | 0:00.19                         |
| 182       | T             | 3             | 2            | 1             | 0:00.20                         |
| 183       | T             | 3             | 2            | 1             | 0:00.18                         |
| 184       | T             | 5             | 4            | 1             | 0:00.34                         |
| 185       | T             | 5             | 4            | 1             | 0:00.27                         |
| 186       | T             | 5             | 4            | 1             | 0:00.27                         |
| 187       | T             | 2             | 1            | 1             | 0:00.18                         |
| 188       | T             | 2             | 1            | 1             | 0:00.15                         |
| 189       | T             | 2             | 1            | 1             | 0:00.14                         |
| 190       | T             | 2             | 1            | 1             | 0:00.15                         |
| 191       | T             | 2             | 1            | 1             | 0:00.16                         |
| 192       | T             | 2             | 1            | 1             | 0:00.14                         |
| 193       | T             | 2             | 1            | 1             | 0:00.20                         |

| <b>Id</b> | <b>Result</b> | <b>#total</b> | <b>#true</b> | <b>#false</b> | <b>Execution time (min:sec)</b> |
|-----------|---------------|---------------|--------------|---------------|---------------------------------|
| 194       | T             | 2             | 1            | 1             | 0:00.16                         |
| 195       | T             | 2             | 1            | 1             | 0:00.15                         |
| 196       | T             | 2             | 1            | 1             | 0:00.15                         |
| 197       | T             | 2             | 1            | 1             | 0:00.16                         |
| 198       | T             | 2             | 1            | 1             | 0:00.15                         |
| 199       | T             | 3             | 2            | 1             | 0:00.21                         |
| 200       | T             | 3             | 2            | 1             | 0:00.19                         |
| 201       | T             | 3             | 2            | 1             | 0:00.18                         |
| 202       | T             | 3             | 2            | 1             | 0:00.20                         |
| 203       | T             | 3             | 2            | 1             | 0:00.19                         |
| 204       | T             | 2             | 1            | 1             | 0:00.17                         |
| 205       | T             | 2             | 1            | 1             | 0:00.14                         |
| 206       | T             | 2             | 1            | 1             | 0:00.16                         |
| 207       | T             | 2             | 1            | 1             | 0:00.16                         |
| 208       | T             | 2             | 1            | 1             | 0:00.15                         |
| 209       | T             | 2             | 1            | 1             | 0:00.15                         |
| 210       | T             | 2             | 1            | 1             | 0:00.17                         |
| 211       | T             | 2             | 1            | 1             | 0:00.15                         |
| 212       | T             | 2             | 1            | 1             | 0:00.14                         |
| 213       | T             | 2             | 1            | 1             | 0:00.14                         |
| 214       | T             | 2             | 1            | 1             | 0:00.15                         |
| 215       | T             | 2             | 1            | 1             | 0:00.13                         |
| 216       | T             | 3             | 2            | 1             | 0:00.26                         |
| 217       | T             | 3             | 2            | 1             | 0:00.18                         |
| 218       | T             | 3             | 2            | 1             | 0:00.20                         |
| 219       | T             | 3             | 2            | 1             | 0:00.20                         |
| 220       | T             | 288           | 168          | 120           | 0:18.72                         |
| 221       | T             | 2             | 1            | 1             | 0:00.16                         |
| 222       | T             | 2             | 1            | 1             | 0:00.15                         |
| 223       | T             | 5             | 4            | 1             | 0:00.34                         |
| 224       | T             | 5             | 4            | 1             | 0:00.27                         |
| 225       | T             | 5             | 4            | 1             | 0:00.27                         |
| 226       | T             | 3             | 2            | 1             | 0:00.22                         |
| 227       | T             | 3             | 2            | 1             | 0:00.19                         |
| 228       | T             | 3             | 2            | 1             | 0:00.19                         |
| 229       | T             | 3             | 2            | 1             | 0:00.19                         |
| 230       | T             | 3             | 2            | 1             | 0:00.21                         |
| 231       | T             | 5             | 1            | 4             | 0:00.30                         |
| 232       | T             | 5             | 1            | 4             | 0:00.30                         |
| 233       | T             | 5             | 1            | 4             | 0:00.29                         |
| 234       | T             | 2             | 1            | 1             | 0:00.16                         |
| 235       | T             | 2             | 1            | 1             | 0:00.14                         |
| 236       | T             | 2             | 1            | 1             | 0:00.14                         |
| 237       | T             | 2             | 1            | 1             | 0:00.14                         |
| 238       | T             | 2             | 1            | 1             | 0:00.14                         |
| 239       | T             | 2             | 1            | 1             | 0:00.14                         |
| 240       | T             | 2             | 1            | 1             | 0:00.14                         |
| 241       | T             | 3             | 1            | 2             | 0:00.21                         |

| <b>Id</b> | <b>Result</b> | <b>#total</b> | <b>#true</b> | <b>#false</b> | <b>Execution time (min:sec)</b> |
|-----------|---------------|---------------|--------------|---------------|---------------------------------|
| 242       | T             | 3             | 1            | 2             | 0:00.20                         |
| 243       | T             | 3             | 1            | 2             | 0:00.21                         |
| 244       | T             | 3             | 1            | 2             | 0:00.20                         |
| 245       | T             | 3             | 1            | 2             | 0:00.20                         |
| 246       | T             | 2             | 1            | 1             | 0:00.19                         |
| 247       | T             | 2             | 1            | 1             | 0:00.15                         |
| 248       | T             | 2             | 1            | 1             | 0:00.15                         |
| 249       | T             | 2             | 1            | 1             | 0:00.14                         |
| 250       | T             | 2             | 1            | 1             | 0:00.16                         |
| 251       | T             | 2             | 1            | 1             | 0:00.17                         |
| 252       | T             | 2             | 1            | 1             | 0:00.15                         |
| 253       | T             | 2             | 1            | 1             | 0:00.15                         |
| 254       | T             | 2             | 1            | 1             | 0:00.15                         |
| 255       | T             | 2             | 1            | 1             | 0:00.14                         |
| 256       | T             | 2             | 1            | 1             | 0:00.15                         |
| 257       | T             | 2             | 1            | 1             | 0:00.15                         |
| 258       | T             | 2             | 1            | 1             | 0:00.15                         |
| 259       | T             | 2             | 1            | 1             | 0:00.15                         |
| 260       | T             | 2             | 1            | 1             | 0:00.14                         |
| 261       | T             | 2             | 1            | 1             | 0:00.15                         |
| 262       | T             | 2             | 1            | 1             | 0:00.14                         |
| 263       | T             | 2             | 1            | 1             | 0:00.16                         |
| 264       | T             | 2             | 1            | 1             | 0:00.14                         |
| 265       | T             | 2             | 1            | 1             | 0:00.15                         |
| 266       | T             | 2             | 1            | 1             | 0:00.15                         |
| 267       | T             | 2             | 1            | 1             | 0:00.15                         |
| 268       | T             | 2             | 1            | 1             | 0:00.15                         |
| 269       | T             | 5             | 5            | 0             | 0:00.31                         |
| 270       | T             | 5             | 5            | 0             | 0:00.28                         |
| 271       | T             | 5             | 5            | 0             | 0:00.27                         |
| 272       | T             | 5             | 5            | 0             | 0:00.28                         |
| 273       | T             | 2             | 1            | 1             | 0:00.16                         |
| 274       | T             | 2             | 1            | 1             | 0:00.16                         |
| 275       | T             | 2             | 1            | 1             | 0:00.16                         |
| 276       | T             | 2             | 1            | 1             | 0:00.14                         |
| 277       | T             | 2             | 1            | 1             | 0:00.16                         |
| 278       | T             | 2             | 1            | 1             | 0:00.18                         |
| 279       | T             | 2             | 1            | 1             | 0:00.14                         |
| 280       | T             | 2             | 1            | 1             | 0:00.15                         |
| 281       | T             | 2             | 1            | 1             | 0:00.16                         |
| 282       | T             | 2             | 1            | 1             | 0:00.14                         |
| 283       | T             | 2             | 1            | 1             | 0:00.15                         |
| 284       | T             | 3             | 2            | 1             | 0:00.22                         |
| 285       | T             | 3             | 2            | 1             | 0:00.18                         |
| 286       | T             | 3             | 2            | 1             | 0:00.19                         |
| 287       | T             | 3             | 2            | 1             | 0:00.18                         |
| 288       | T             | 3             | 2            | 1             | 0:00.19                         |
| 289       | T             | 2             | 1            | 1             | 0:00.15                         |



| <b>Id</b> | <b>Result</b> | <b>#total</b> | <b>#true</b> | <b>#false</b> | <b>Execution time (min:sec)</b> |
|-----------|---------------|---------------|--------------|---------------|---------------------------------|
| 290       | T             | 2             | 1            | 1             | 0:00.16                         |
| 291       | T             | 2             | 1            | 1             | 0:00.15                         |
| 292       | T             | 2             | 1            | 1             | 0:00.14                         |
| 293       | T             | 2             | 1            | 1             | 0:00.15                         |
| 294       | T             | 2             | 1            | 1             | 0:00.15                         |
| 295       | T             | 5             | 5            | 0             | 0:00.32                         |
| 296       | T             | 5             | 5            | 0             | 0:00.28                         |
| 297       | T             | 5             | 5            | 0             | 0:00.26                         |
| 298       | T             | 3             | 2            | 1             | 0:00.22                         |
| 299       | T             | 3             | 2            | 1             | 0:00.19                         |
| 300       | T             | 3             | 2            | 1             | 0:00.18                         |
| 301       | T             | 3             | 2            | 1             | 0:00.19                         |
| 302       | T             | 3             | 2            | 1             | 0:00.19                         |
| 303       | T             | 2             | 1            | 1             | 0:00.17                         |
| 304       | T             | 2             | 1            | 1             | 0:00.14                         |
| 305       | T             | 2             | 1            | 1             | 0:00.13                         |
| 306       | T             | 2             | 1            | 1             | 0:00.14                         |
| 307       | T             | 2             | 1            | 1             | 0:00.14                         |
| 308       | T             | 2             | 1            | 1             | 0:00.14                         |
| 309       | T             | 2             | 1            | 1             | 0:00.16                         |
| 310       | T             | 2             | 1            | 1             | 0:00.14                         |
| 311       | T             | 2             | 1            | 1             | 0:00.14                         |
| 312       | T             | 2             | 1            | 1             | 0:00.14                         |
| 313       | T             | 2             | 1            | 1             | 0:00.14                         |
| 314       | T             | 2             | 1            | 1             | 0:00.14                         |
| 315       | T             | 2             | 1            | 1             | 0:00.14                         |
| 316       | T             | 2             | 1            | 1             | 0:00.15                         |
| 317       | T             | 2             | 1            | 1             | 0:00.15                         |
| 318       | T             | 2             | 1            | 1             | 0:00.14                         |
| 319       | T             | 2             | 1            | 1             | 0:00.13                         |
| 320       | T             | 2             | 1            | 1             | 0:00.14                         |
| 321       | T             | 2             | 1            | 1             | 0:00.15                         |
| 322       | T             | 5             | 5            | 0             | 0:00.32                         |
| 323       | T             | 5             | 5            | 0             | 0:00.29                         |
| 324       | T             | 5             | 5            | 0             | 0:00.30                         |
| 325       | T             | 2             | 1            | 1             | 0:00.15                         |
| 326       | T             | 2             | 1            | 1             | 0:00.15                         |
| 327       | T             | 2             | 1            | 1             | 0:00.15                         |
| 328       | T             | 2             | 1            | 1             | 0:00.13                         |
| 329       | T             | 2             | 1            | 1             | 0:00.14                         |
| 330       | T             | 2             | 1            | 1             | 0:00.14                         |
| 331       | T             | 2             | 1            | 1             | 0:00.14                         |
| 332       | T             | 3             | 2            | 1             | 0:00.20                         |
| 333       | T             | 3             | 2            | 1             | 0:00.19                         |
| 334       | T             | 3             | 2            | 1             | 0:00.18                         |
| 335       | T             | 3             | 2            | 1             | 0:00.18                         |
| 336       | T             | 3             | 2            | 1             | 0:00.19                         |
| 337       | T             | 2             | 1            | 1             | 0:00.17                         |

| <b>Id</b> | <b>Result</b> | <b>#total</b> | <b>#true</b> | <b>#false</b> | <b>Execution time (min:sec)</b> |
|-----------|---------------|---------------|--------------|---------------|---------------------------------|
| 338       | T             | 2             | 1            | 1             | 0:00.14                         |
| 339       | T             | 2             | 1            | 1             | 0:00.15                         |
| 340       | T             | 2             | 1            | 1             | 0:00.14                         |
| 341       | T             | 2             | 1            | 1             | 0:00.15                         |
| 342       | T             | 2             | 1            | 1             | 0:00.16                         |
| 343       | T             | 2             | 1            | 1             | 0:00.17                         |
| 344       | T             | 2             | 1            | 1             | 0:00.14                         |
| 345       | T             | 2             | 1            | 1             | 0:00.14                         |
| 346       | T             | 2             | 1            | 1             | 0:00.13                         |
| 347       | T             | 2             | 1            | 1             | 0:00.14                         |
| 348       | T             | 2             | 1            | 1             | 0:00.14                         |
| 349       | T             | 5             | 5            | 0             | 0:00.31                         |
| 350       | T             | 5             | 5            | 0             | 0:00.28                         |
| 351       | T             | 5             | 5            | 0             | 0:00.27                         |
| 352       | T             | 2             | 1            | 1             | 0:00.16                         |
| 353       | T             | 2             | 1            | 1             | 0:00.14                         |
| 354       | T             | 2             | 1            | 1             | 0:00.14                         |
| 355       | T             | 2             | 1            | 1             | 0:00.14                         |
| 356       | T             | 2             | 1            | 1             | 0:00.14                         |
| 357       | T             | 2             | 1            | 1             | 0:00.14                         |
| 358       | T             | 2             | 1            | 1             | 0:00.14                         |
| 359       | T             | 2             | 1            | 1             | 0:00.16                         |
| 360       | T             | 2             | 1            | 1             | 0:00.16                         |
| 361       | T             | 2             | 1            | 1             | 0:00.15                         |
| 362       | T             | 2             | 1            | 1             | 0:00.15                         |
| 363       | T             | 2             | 1            | 1             | 0:00.15                         |
| 364       | T             | 2             | 1            | 1             | 0:00.15                         |
| 365       | T             | 2             | 1            | 1             | 0:00.17                         |
| 366       | T             | 2             | 1            | 1             | 0:00.15                         |
| 367       | T             | 2             | 1            | 1             | 0:00.14                         |
| 368       | T             | 2             | 1            | 1             | 0:00.16                         |
| 369       | T             | 2             | 1            | 1             | 0:00.14                         |
| 370       | T             | 2             | 1            | 1             | 0:00.15                         |
| 371       | T             | 5             | 4            | 1             | 0:00.32                         |
| 372       | T             | 5             | 4            | 1             | 0:00.29                         |
| 373       | T             | 5             | 4            | 1             | 0:00.28                         |
| 374       | T             | 2             | 1            | 1             | 0:00.19                         |
| 375       | T             | 2             | 1            | 1             | 0:00.15                         |
| 376       | T             | 2             | 1            | 1             | 0:00.14                         |
| 377       | T             | 2             | 1            | 1             | 0:00.14                         |
| 378       | T             | 2             | 1            | 1             | 0:00.14                         |
| 379       | T             | 2             | 1            | 1             | 0:00.14                         |
| 380       | T             | 2             | 1            | 1             | 0:00.18                         |
| 381       | T             | 2             | 1            | 1             | 0:00.15                         |
| 382       | T             | 2             | 1            | 1             | 0:00.15                         |
| 383       | T             | 2             | 1            | 1             | 0:00.14                         |
| 384       | T             | 2             | 1            | 1             | 0:00.15                         |
| 385       | T             | 2             | 1            | 1             | 0:00.15                         |

| <b>Id</b> | <b>Result</b> | <b>#total</b> | <b>#true</b> | <b>#false</b> | <b>Execution time (min:sec)</b> |
|-----------|---------------|---------------|--------------|---------------|---------------------------------|
| 386       | T             | 2             | 1            | 1             | 0:00.19                         |
| 387       | T             | 2             | 1            | 1             | 0:00.15                         |
| 388       | T             | 2             | 1            | 1             | 0:00.15                         |
| 389       | T             | 2             | 1            | 1             | 0:00.15                         |
| 390       | T             | 2             | 1            | 1             | 0:00.15                         |
| 391       | T             | 2             | 1            | 1             | 0:00.15                         |
| 392       | T             | 2             | 1            | 1             | 0:00.14                         |
| 393       | T             | 2             | 1            | 1             | 0:00.14                         |
| 394       | T             | 2             | 1            | 1             | 0:00.15                         |
| 395       | T             | 2             | 1            | 1             | 0:00.15                         |
| 396       | T             | 2             | 1            | 1             | 0:00.14                         |
| 397       | T             | 2             | 1            | 1             | 0:00.14                         |
| 398       | T             | 4             | 3            | 1             | 0:00.27                         |
| 399       | T             | 4             | 3            | 1             | 0:00.23                         |
| 400       | T             | 4             | 3            | 1             | 0:00.24                         |
| 401       | T             | 4             | 3            | 1             | 0:00.24                         |
| 402       | T             | 4             | 1            | 3             | 0:00.27                         |
| 403       | T             | 4             | 1            | 3             | 0:00.24                         |
| 404       | T             | 4             | 1            | 3             | 0:00.24                         |
| 405       | T             | 4             | 1            | 3             | 0:00.24                         |
| 406       | T             | 2             | 1            | 1             | 0:00.16                         |
| 407       | T             | 2             | 1            | 1             | 0:00.14                         |
| 408       | T             | 2             | 1            | 1             | 0:00.14                         |
| 409       | T             | 2             | 1            | 1             | 0:00.15                         |
| 410       | T             | 2             | 1            | 1             | 0:00.14                         |
| 411       | T             | 2             | 1            | 1             | 0:00.14                         |
| 412       | T             | 3             | 1            | 2             | 0:00.21                         |
| 413       | T             | 3             | 1            | 2             | 0:00.19                         |
| 414       | T             | 3             | 1            | 2             | 0:00.19                         |
| 415       | T             | 3             | 1            | 2             | 0:00.20                         |
| 416       | T             | 3             | 1            | 2             | 0:00.19                         |
| 417       | T             | 2             | 1            | 1             | 0:00.15                         |
| 418       | T             | 2             | 1            | 1             | 0:00.16                         |
| 419       | T             | 2             | 1            | 1             | 0:00.16                         |
| 420       | T             | 2             | 1            | 1             | 0:00.15                         |
| 421       | T             | 2             | 1            | 1             | 0:00.15                         |
| 422       | T             | 2             | 1            | 1             | 0:00.14                         |
| 423       | T             | 3             | 2            | 1             | 0:00.21                         |
| 424       | T             | 3             | 2            | 1             | 0:00.19                         |
| 425       | T             | 3             | 2            | 1             | 0:00.19                         |
| 426       | T             | 3             | 2            | 1             | 0:00.19                         |
| 427       | T             | 3             | 2            | 1             | 0:00.19                         |
| 428       | T             | 2             | 1            | 1             | 0:00.18                         |
| 429       | T             | 2             | 1            | 1             | 0:00.14                         |
| 430       | T             | 2             | 1            | 1             | 0:00.14                         |
| 431       | T             | 2             | 1            | 1             | 0:00.15                         |
| 432       | T             | 2             | 1            | 1             | 0:00.15                         |
| 433       | T             | 3             | 2            | 1             | 0:00.21                         |

| <b>Id</b> | <b>Result</b> | <b>#total</b> | <b>#true</b> | <b>#false</b> | <b>Execution time (min:sec)</b> |
|-----------|---------------|---------------|--------------|---------------|---------------------------------|
| 434       | T             | 3             | 2            | 1             | 0:00.19                         |
| 435       | T             | 3             | 2            | 1             | 0:00.19                         |
| 436       | T             | 3             | 2            | 1             | 0:00.19                         |
| 437       | T             | 3             | 2            | 1             | 0:00.19                         |
| 438       | T             | 5             | 4            | 1             | 0:00.32                         |
| 439       | T             | 5             | 4            | 1             | 0:00.27                         |
| 440       | T             | 5             | 4            | 1             | 0:00.28                         |
| 441       | T             | 5             | 4            | 1             | 0:00.29                         |
| 442       | T             | 5             | 1            | 4             | 0:00.31                         |
| 443       | T             | 5             | 1            | 4             | 0:00.30                         |
| 444       | T             | 5             | 1            | 4             | 0:00.28                         |
| 445       | T             | 4             | 3            | 1             | 0:00.25                         |
| 446       | T             | 4             | 3            | 1             | 0:00.23                         |
| 447       | T             | 4             | 3            | 1             | 0:00.22                         |
| 448       | T             | 4             | 3            | 1             | 0:00.23                         |
| 449       | T             | 5             | 5            | 0             | 0:00.27                         |
| 450       | T             | 5             | 5            | 0             | 0:00.29                         |
| 451       | T             | 5             | 5            | 0             | 0:00.27                         |
| 452       | T             | 2             | 1            | 1             | 0:00.19                         |
| 453       | T             | 2             | 1            | 1             | 0:00.17                         |
| 454       | T             | 2             | 1            | 1             | 0:00.16                         |
| 455       | T             | 2             | 1            | 1             | 0:00.14                         |
| 456       | T             | 2             | 1            | 1             | 0:00.16                         |
| 457       | T             | 2             | 1            | 1             | 0:00.14                         |
| 458       | T             | 2             | 1            | 1             | 0:00.15                         |
| 459       | T             | 2             | 1            | 1             | 0:00.15                         |
| 460       | T             | 2             | 1            | 1             | 0:00.14                         |
| 461       | T             | 2             | 1            | 1             | 0:00.16                         |
| 462       | T             | 2             | 1            | 1             | 0:00.14                         |
| 463       | T             | 2             | 1            | 1             | 0:00.16                         |
| 464       | T             | 4             | 1            | 3             | 0:00.29                         |
| 465       | T             | 4             | 1            | 3             | 0:00.23                         |
| 466       | T             | 4             | 1            | 3             | 0:00.25                         |
| 467       | T             | 4             | 1            | 3             | 0:00.25                         |
| 468       | T             | 3             | 1            | 2             | 0:00.21                         |
| 469       | T             | 3             | 1            | 2             | 0:00.18                         |
| 470       | T             | 3             | 1            | 2             | 0:00.19                         |
| 471       | T             | 3             | 1            | 2             | 0:00.19                         |
| 472       | T             | 3             | 1            | 2             | 0:00.23                         |
| 473       | T             | 3             | 1            | 2             | 0:00.19                         |
| 474       | T             | 3             | 1            | 2             | 0:00.20                         |
| 475       | T             | 3             | 1            | 2             | 0:00.22                         |
| 476       | T             | 3             | 1            | 2             | 0:00.20                         |
| 477       | T             | 3             | 2            | 1             | 0:00.23                         |
| 478       | T             | 3             | 2            | 1             | 0:00.18                         |
| 479       | T             | 3             | 2            | 1             | 0:00.19                         |
| 480       | T             | 3             | 2            | 1             | 0:00.19                         |
| 481       | T             | 3             | 2            | 1             | 0:00.20                         |

| <b>Id</b> | <b>Result</b> | <b>#total</b> | <b>#true</b> | <b>#false</b> | <b>Execution time (min:sec)</b> |
|-----------|---------------|---------------|--------------|---------------|---------------------------------|
| 482       | T             | 5             | 4            | 1             | 0:00.31                         |
| 483       | T             | 5             | 4            | 1             | 0:00.27                         |
| 484       | T             | 5             | 4            | 1             | 0:00.28                         |
| 485       | T             | 2             | 1            | 1             | 0:00.16                         |
| 486       | T             | 2             | 1            | 1             | 0:00.15                         |
| 487       | T             | 2             | 1            | 1             | 0:00.15                         |
| 488       | T             | 2             | 1            | 1             | 0:00.16                         |
| 489       | T             | 2             | 1            | 1             | 0:00.15                         |
| 490       | T             | 2             | 1            | 1             | 0:00.15                         |
| 491       | T             | 2             | 1            | 1             | 0:00.14                         |
| 492       | T             | 2             | 1            | 1             | 0:00.15                         |
| 493       | T             | 2             | 1            | 1             | 0:00.14                         |
| 494       | T             | 2             | 1            | 1             | 0:00.14                         |
| 495       | T             | 2             | 1            | 1             | 0:00.15                         |
| 496       | T             | 2             | 1            | 1             | 0:00.15                         |
| 497       | T             | 2             | 1            | 1             | 0:00.17                         |
| 498       | T             | 2             | 1            | 1             | 0:00.15                         |
| 499       | T             | 2             | 1            | 1             | 0:00.15                         |
| 500       | T             | 2             | 1            | 1             | 0:00.14                         |

Table 5: Model checking results corresponding to logic property 5

| <b>Id</b> | <b>Result</b> | <b>#total</b> | <b>#true</b> | <b>#false</b> | <b>Execution time (min:sec)</b> |
|-----------|---------------|---------------|--------------|---------------|---------------------------------|
| 1         | T             | 8             | 5            | 3             | 0:00.52                         |
| 2         | T             | 6             | 4            | 2             | 0:00.49                         |
| 3         | T             | 6             | 4            | 2             | 0:00.46                         |
| 4         | T             | 6             | 4            | 2             | 0:00.49                         |
| 5         | T             | 6             | 4            | 2             | 0:00.44                         |
| 6         | T             | 19            | 9            | 10            | 0:01.35                         |
| 7         | T             | 6             | 4            | 2             | 0:00.39                         |
| 8         | T             | 6             | 4            | 2             | 0:00.34                         |
| 9         | T             | 26            | 12           | 14            | 0:01.82                         |
| 10        | F             | 14            | 3            | 11            | 0:01.07                         |
| 11        | F             | 14            | 3            | 11            | 0:01.15                         |
| 12        | F             | 66            | 29           | 37            | 0:04.22                         |
| 13        | T             | 6             | 5            | 1             | 0:00.38                         |
| 14        | T             | 16            | 8            | 8             | 0:01.16                         |
| 15        | T             | 5             | 4            | 1             | 0:00.28                         |
| 16        | T             | 5             | 4            | 1             | 0:00.28                         |
| 17        | T             | 5             | 4            | 1             | 0:00.27                         |
| 18        | T             | 19            | 9            | 10            | 0:01.60                         |
| 19        | F             | 20            | 6            | 14            | 0:01.68                         |
| 20        | F             | 46            | 19           | 27            | 0:02.93                         |
| 21        | T             | 16            | 8            | 8             | 0:00.89                         |
| 22        | T             | 6             | 4            | 2             | 0:00.36                         |

| Id | Result | #total | #true | #false | Execution time (min:sec) |
|----|--------|--------|-------|--------|--------------------------|
| 23 | T      | 6      | 4     | 2      | 0:00.32                  |
| 24 | T      | 6      | 4     | 2      | 0:00.32                  |
| 25 | F      | 8      | 0     | 8      | 0:00.59                  |
| 26 | F      | 8      | 0     | 8      | 0:00.55                  |
| 27 | T      | 6      | 4     | 2      | 0:00.40                  |
| 28 | T      | 6      | 4     | 2      | 0:00.37                  |
| 29 | F      | 12     | 2     | 10     | 0:00.85                  |
| 30 | T      | 23     | 11    | 12     | 0:01.37                  |
| 31 | F      | 16     | 4     | 12     | 0:01.13                  |
| 32 | F      | 12     | 2     | 10     | 0:00.82                  |
| 33 | F      | 16     | 4     | 12     | 0:01.00                  |
| 34 | T      | 16     | 8     | 8      | 0:00.99                  |
| 35 | T      | 6      | 4     | 2      | 0:00.39                  |
| 36 | T      | 6      | 4     | 2      | 0:00.36                  |
| 37 | T      | 11     | 6     | 5      | 0:00.96                  |
| 38 | T      | 6      | 4     | 2      | 0:00.36                  |
| 39 | T      | 6      | 4     | 2      | 0:00.34                  |
| 40 | T      | 6      | 4     | 2      | 0:00.34                  |
| 41 | T      | 50     | 21    | 29     | 0:03.26                  |
| 42 | F      | 14     | 3     | 11     | 0:01.08                  |
| 43 | T      | 18     | 9     | 9      | 0:01.14                  |
| 44 | T      | 8      | 5     | 3      | 0:00.45                  |
| 45 | T      | 6      | 4     | 2      | 0:00.36                  |
| 46 | T      | 6      | 4     | 2      | 0:00.37                  |
| 47 | F      | 22     | 7     | 15     | 0:01.54                  |
| 48 | T      | 15     | 8     | 7      | 0:01.13                  |
| 49 | T      | 6      | 4     | 2      | 0:00.35                  |
| 50 | F      | 8      | 0     | 8      | 0:00.62                  |
| 51 | F      | 8      | 0     | 8      | 0:00.59                  |
| 52 | T      | 11     | 6     | 5      | 0:00.77                  |
| 53 | T      | 6      | 4     | 2      | 0:00.36                  |
| 54 | T      | 6      | 4     | 2      | 0:00.35                  |
| 55 | T      | 6      | 4     | 2      | 0:00.35                  |
| 56 | T      | 5      | 4     | 1      | 0:00.29                  |
| 57 | T      | 5      | 4     | 1      | 0:00.28                  |
| 58 | T      | 5      | 4     | 1      | 0:00.28                  |
| 59 | T      | 16     | 8     | 8      | 0:01.13                  |
| 60 | T      | 21     | 10    | 11     | 0:01.36                  |
| 61 | T      | 23     | 11    | 12     | 0:01.65                  |
| 62 | F      | 14     | 3     | 11     | 0:00.98                  |
| 63 | T      | 15     | 8     | 7      | 0:00.91                  |
| 64 | F      | 25     | 8     | 17     | 0:01.83                  |
| 65 | F      | 117    | 57    | 60     | 0:06.85                  |
| 66 | T      | 6      | 4     | 2      | 0:00.33                  |
| 67 | T      | 10     | 6     | 4      | 0:00.65                  |
| 68 | T      | 10     | 6     | 4      | 0:00.58                  |
| 69 | F      | 38     | 13    | 25     | 0:02.55                  |
| 70 | T      | 11     | 6     | 5      | 0:01.19                  |

| <b>Id</b> | <b>Result</b> | <b>#total</b> | <b>#true</b> | <b>#false</b> | <b>Execution time (min:sec)</b> |
|-----------|---------------|---------------|--------------|---------------|---------------------------------|
| 71        | F             | 30            | 11           | 19            | 0:01.75                         |
| 72        | T             | 6             | 4            | 2             | 0:00.34                         |
| 73        | T             | 6             | 4            | 2             | 0:00.34                         |
| 74        | T             | 6             | 4            | 2             | 0:00.33                         |
| 75        | T             | 6             | 4            | 2             | 0:00.42                         |
| 76        | T             | 6             | 4            | 2             | 0:00.39                         |
| 77        | T             | 6             | 4            | 2             | 0:00.39                         |
| 78        | T             | 6             | 4            | 2             | 0:00.38                         |
| 79        | T             | 6             | 4            | 2             | 0:00.38                         |
| 80        | T             | 13            | 7            | 6             | 0:00.68                         |
| 81        | T             | 13            | 7            | 6             | 0:00.68                         |
| 82        | T             | 50            | 21           | 29            | 0:03.27                         |
| 83        | T             | 65            | 27           | 38            | 0:03.76                         |
| 84        | T             | 13            | 7            | 6             | 0:00.83                         |
| 85        | T             | 18            | 9            | 9             | 0:01.14                         |
| 86        | T             | 8             | 5            | 3             | 0:00.41                         |
| 87        | T             | 10            | 6            | 4             | 0:00.83                         |
| 88        | T             | 10            | 6            | 4             | 0:00.84                         |
| 89        | F             | 18            | 5            | 13            | 0:01.15                         |
| 90        | T             | 41            | 18           | 23            | 0:02.65                         |
| 91        | F             | 12            | 2            | 10            | 0:00.67                         |
| 92        | T             | 11            | 6            | 5             | 0:00.63                         |
| 93        | T             | 11            | 6            | 5             | 0:00.60                         |
| 94        | T             | 5             | 4            | 1             | 0:00.31                         |
| 95        | T             | 5             | 4            | 1             | 0:00.32                         |
| 96        | F             | 14            | 3            | 11            | 0:00.84                         |
| 97        | T             | 6             | 4            | 2             | 0:00.34                         |
| 98        | T             | 6             | 4            | 2             | 0:00.35                         |
| 99        | T             | 6             | 4            | 2             | 0:00.33                         |
| 100       | F             | 8             | 0            | 8             | 0:00.51                         |
| 101       | F             | 8             | 0            | 8             | 0:00.53                         |
| 102       | T             | 5             | 4            | 1             | 0:00.32                         |
| 103       | T             | 5             | 4            | 1             | 0:00.31                         |
| 104       | T             | 5             | 4            | 1             | 0:00.34                         |
| 105       | T             | 5             | 4            | 1             | 0:00.32                         |
| 106       | T             | 5             | 4            | 1             | 0:00.28                         |
| 107       | T             | 5             | 4            | 1             | 0:00.28                         |
| 108       | T             | 8             | 5            | 3             | 0:00.50                         |
| 109       | T             | 8             | 5            | 3             | 0:00.48                         |
| 110       | T             | 6             | 4            | 2             | 0:00.40                         |
| 111       | T             | 6             | 4            | 2             | 0:00.39                         |
| 112       | T             | 6             | 4            | 2             | 0:00.37                         |
| 113       | T             | 5             | 4            | 1             | 0:00.29                         |
| 114       | T             | 5             | 4            | 1             | 0:00.29                         |
| 115       | T             | 5             | 4            | 1             | 0:00.31                         |
| 116       | F             | 18            | 5            | 13            | 0:01.35                         |
| 117       | F             | 18            | 5            | 13            | 0:01.31                         |
| 118       | T             | 16            | 8            | 8             | 0:00.86                         |

| <b>Id</b> | <b>Result</b> | <b>#total</b> | <b>#true</b> | <b>#false</b> | <b>Execution time (min:sec)</b> |
|-----------|---------------|---------------|--------------|---------------|---------------------------------|
| 119       | T             | 19            | 9            | 10            | 0:01.09                         |
| 120       | F             | 16            | 4            | 12            | 0:01.32                         |
| 121       | T             | 8             | 5            | 3             | 0:00.42                         |
| 122       | T             | 8             | 5            | 3             | 0:00.43                         |
| 123       | T             | 21            | 10           | 11            | 0:01.57                         |
| 124       | F             | 22            | 7            | 15            | 0:01.45                         |
| 125       | T             | 5             | 4            | 1             | 0:00.30                         |
| 126       | T             | 5             | 4            | 1             | 0:00.28                         |
| 127       | T             | 5             | 4            | 1             | 0:00.27                         |
| 128       | F             | 33            | 11           | 22            | 0:02.91                         |
| 129       | F             | 28            | 9            | 19            | 0:02.22                         |
| 130       | F             | 23            | 7            | 16            | 0:03.22                         |
| 131       | F             | 28            | 9            | 19            | 0:03.01                         |
| 132       | T             | 8             | 5            | 3             | 0:00.59                         |
| 133       | T             | 5             | 4            | 1             | 0:00.28                         |
| 134       | T             | 5             | 4            | 1             | 0:00.29                         |
| 135       | T             | 5             | 4            | 1             | 0:00.30                         |
| 136       | T             | 5             | 4            | 1             | 0:00.30                         |
| 137       | T             | 6             | 4            | 2             | 0:00.43                         |
| 138       | T             | 6             | 4            | 2             | 0:00.40                         |
| 139       | T             | 6             | 4            | 2             | 0:00.86                         |
| 140       | F             | 54            | 19           | 35            | 0:03.10                         |
| 141       | T             | 11            | 6            | 5             | 0:00.64                         |
| 142       | T             | 11            | 6            | 5             | 0:00.60                         |
| 143       | F             | 20            | 6            | 14            | 0:01.14                         |
| 144       | F             | 12            | 2            | 10            | 0:00.71                         |
| 145       | T             | 6             | 4            | 2             | 0:00.45                         |
| 146       | T             | 6             | 4            | 2             | 0:00.41                         |
| 147       | T             | 10            | 6            | 4             | 0:00.56                         |
| 148       | T             | 10            | 6            | 4             | 0:00.53                         |
| 149       | T             | 18            | 9            | 9             | 0:01.29                         |
| 150       | T             | 11            | 6            | 5             | 0:00.65                         |
| 151       | T             | 5             | 4            | 1             | 0:00.30                         |
| 152       | T             | 5             | 4            | 1             | 0:00.29                         |
| 153       | T             | 5             | 4            | 1             | 0:00.29                         |
| 154       | T             | 11            | 6            | 5             | 0:00.68                         |
| 155       | T             | 11            | 6            | 5             | 0:00.67                         |
| 156       | T             | 42            | 18           | 24            | 0:02.85                         |
| 157       | T             | 6             | 4            | 2             | 0:00.43                         |
| 158       | T             | 6             | 4            | 2             | 0:00.41                         |
| 159       | F             | 28            | 9            | 19            | 0:01.54                         |
| 160       | T             | 21            | 10           | 11            | 0:01.57                         |
| 161       | T             | 34            | 15           | 19            | 0:02.51                         |
| 162       | T             | 15            | 8            | 7             | 0:00.91                         |
| 163       | T             | 13            | 7            | 6             | 0:00.86                         |
| 164       | T             | 6             | 4            | 2             | 0:00.34                         |
| 165       | F             | 33            | 11           | 22            | 0:02.09                         |
| 166       | T             | 19            | 9            | 10            | 0:01.40                         |



| <b>Id</b> | <b>Result</b> | <b>#total</b> | <b>#true</b> | <b>#false</b> | <b>Execution time (min:sec)</b> |
|-----------|---------------|---------------|--------------|---------------|---------------------------------|
| 167       | F             | 14            | 3            | 11            | 0:00.90                         |
| 168       | T             | 16            | 8            | 8             | 0:00.96                         |
| 169       | T             | 10            | 6            | 4             | 0:00.67                         |
| 170       | T             | 8             | 5            | 3             | 0:00.48                         |
| 171       | T             | 8             | 5            | 3             | 0:00.47                         |
| 172       | F             | 60            | 26           | 34            | 0:03.64                         |
| 173       | T             | 5             | 4            | 1             | 0:00.28                         |
| 174       | F             | 18            | 5            | 13            | 0:01.57                         |
| 175       | F             | 26            | 9            | 17            | 0:01.69                         |
| 176       | T             | 18            | 9            | 9             | 0:01.01                         |
| 177       | T             | 10            | 6            | 4             | 0:00.54                         |
| 178       | T             | 11            | 6            | 5             | 0:00.67                         |
| 179       | T             | 11            | 6            | 5             | 0:00.67                         |
| 180       | T             | 23            | 11           | 12            | 0:01.49                         |
| 181       | F             | 28            | 9            | 19            | 0:01.63                         |
| 182       | T             | 13            | 7            | 6             | 0:00.79                         |
| 183       | F             | 20            | 6            | 14            | 0:01.20                         |
| 184       | F             | 16            | 4            | 12            | 0:00.92                         |
| 185       | T             | 5             | 4            | 1             | 0:00.29                         |
| 186       | T             | 5             | 4            | 1             | 0:00.29                         |
| 187       | T             | 5             | 4            | 1             | 0:00.31                         |
| 188       | T             | 5             | 4            | 1             | 0:00.30                         |
| 189       | T             | 5             | 4            | 1             | 0:00.31                         |
| 190       | F             | 34            | 13           | 21            | 0:01.97                         |
| 191       | T             | 29            | 13           | 16            | 0:01.82                         |
| 192       | F             | 22            | 7            | 15            | 0:01.94                         |
| 193       | F             | 16            | 4            | 12            | 0:00.94                         |
| 194       | T             | 5             | 4            | 1             | 0:00.38                         |
| 195       | T             | 11            | 6            | 5             | 0:00.60                         |
| 196       | T             | 11            | 6            | 5             | 0:00.60                         |
| 197       | T             | 13            | 7            | 6             | 0:01.02                         |
| 198       | F             | 46            | 16           | 30            | 0:03.53                         |
| 199       | T             | 8             | 5            | 3             | 0:00.48                         |
| 200       | T             | 8             | 5            | 3             | 0:00.47                         |
| 201       | T             | 23            | 11           | 12            | 0:01.20                         |
| 202       | T             | 41            | 18           | 23            | 0:02.66                         |
| 203       | T             | 8             | 5            | 3             | 0:00.45                         |
| 204       | T             | 5             | 4            | 1             | 0:00.31                         |
| 205       | T             | 5             | 4            | 1             | 0:00.31                         |
| 206       | T             | 49            | 21           | 28            | 0:03.20                         |
| 207       | T             | 19            | 9            | 10            | 0:01.24                         |
| 208       | F             | 20            | 6            | 14            | 0:01.43                         |
| 209       | T             | 21            | 10           | 11            | 0:01.27                         |
| 210       | F             | 20            | 6            | 14            | 0:01.21                         |
| 211       | F             | 38            | 13           | 25            | 0:02.35                         |
| 212       | T             | 6             | 4            | 2             | 0:00.33                         |
| 213       | T             | 34            | 15           | 19            | 0:02.41                         |
| 214       | F             | 16            | 4            | 12            | 0:00.98                         |

| <b>Id</b> | <b>Result</b> | <b>#total</b> | <b>#true</b> | <b>#false</b> | <b>Execution time (min:sec)</b> |
|-----------|---------------|---------------|--------------|---------------|---------------------------------|
| 215       | T             | 16            | 8            | 8             | 0:01.07                         |
| 216       | T             | 6             | 5            | 1             | 0:00.35                         |
| 217       | T             | 6             | 4            | 2             | 0:00.36                         |
| 218       | T             | 6             | 4            | 2             | 0:00.39                         |
| 219       | T             | 6             | 4            | 2             | 0:00.40                         |
| 220       | F             | 24            | 8            | 16            | 0:01.60                         |
| 221       | T             | 8             | 5            | 3             | 0:00.58                         |
| 222       | T             | 34            | 15           | 19            | 0:02.13                         |
| 223       | F             | 20            | 6            | 14            | 0:01.39                         |
| 224       | F             | 25            | 8            | 17            | 0:01.53                         |
| 225       | F             | 16            | 4            | 12            | 0:00.91                         |
| 226       | T             | 13            | 7            | 6             | 0:00.75                         |
| 227       | F             | 16            | 4            | 12            | 0:00.92                         |
| 228       | F             | 20            | 6            | 14            | 0:01.09                         |
| 229       | F             | 46            | 19           | 27            | 0:02.80                         |
| 230       | T             | 11            | 6            | 5             | 0:00.69                         |
| 231       | T             | 11            | 6            | 5             | 0:00.67                         |
| 232       | F             | 14            | 3            | 11            | 0:00.87                         |
| 233       | T             | 10            | 6            | 4             | 0:00.55                         |
| 234       | T             | 10            | 6            | 4             | 0:00.54                         |
| 235       | F             | 38            | 13           | 25            | 0:02.59                         |
| 236       | T             | 11            | 6            | 5             | 0:00.61                         |
| 237       | T             | 11            | 6            | 5             | 0:00.61                         |
| 238       | T             | 6             | 5            | 1             | 0:00.33                         |
| 239       | T             | 6             | 5            | 1             | 0:00.34                         |
| 240       | T             | 6             | 4            | 2             | 0:00.36                         |
| 241       | T             | 6             | 4            | 2             | 0:00.37                         |
| 242       | T             | 6             | 4            | 2             | 0:00.36                         |
| 243       | T             | 11            | 6            | 5             | 0:00.71                         |
| 244       | T             | 11            | 6            | 5             | 0:00.69                         |
| 245       | F             | 20            | 6            | 14            | 0:01.71                         |
| 246       | F             | 10            | 1            | 9             | 0:00.66                         |
| 247       | F             | 10            | 1            | 9             | 0:00.67                         |
| 248       | T             | 6             | 4            | 2             | 0:00.42                         |
| 249       | F             | 16            | 4            | 12            | 0:01.09                         |
| 250       | F             | 18            | 5            | 13            | 0:01.18                         |
| 251       | T             | 19            | 9            | 10            | 0:01.11                         |
| 252       | T             | 18            | 9            | 9             | 0:01.25                         |
| 253       | T             | 11            | 6            | 5             | 0:00.72                         |
| 254       | F             | 22            | 7            | 15            | 0:01.48                         |
| 255       | T             | 19            | 9            | 10            | 0:01.09                         |
| 256       | T             | 21            | 10           | 11            | 0:01.48                         |
| 257       | T             | 6             | 4            | 2             | 0:00.54                         |
| 258       | F             | 20            | 6            | 14            | 0:01.47                         |
| 259       | T             | 5             | 4            | 1             | 0:00.29                         |
| 260       | T             | 5             | 4            | 1             | 0:00.30                         |
| 261       | T             | 11            | 6            | 5             | 0:00.67                         |
| 262       | T             | 11            | 6            | 5             | 0:00.65                         |

| <b>Id</b> | <b>Result</b> | <b>#total</b> | <b>#true</b> | <b>#false</b> | <b>Execution time (min:sec)</b> |
|-----------|---------------|---------------|--------------|---------------|---------------------------------|
| 263       | T             | 5             | 4            | 1             | 0:00.34                         |
| 264       | T             | 5             | 4            | 1             | 0:00.33                         |
| 265       | F             | 10            | 1            | 9             | 0:00.57                         |
| 266       | F             | 10            | 1            | 9             | 0:00.55                         |
| 267       | T             | 5             | 4            | 1             | 0:00.28                         |
| 268       | T             | 5             | 4            | 1             | 0:00.27                         |
| 269       | T             | 21            | 10           | 11            | 0:01.30                         |
| 270       | F             | 14            | 3            | 11            | 0:01.02                         |
| 271       | F             | 16            | 4            | 12            | 0:01.37                         |
| 272       | T             | 15            | 8            | 7             | 0:00.91                         |
| 273       | T             | 5             | 4            | 1             | 0:00.28                         |
| 274       | F             | 18            | 5            | 13            | 0:01.36                         |
| 275       | T             | 11            | 6            | 5             | 0:00.60                         |
| 276       | T             | 24            | 11           | 13            | 0:01.73                         |
| 277       | T             | 6             | 5            | 1             | 0:00.33                         |
| 278       | T             | 8             | 5            | 3             | 0:00.63                         |
| 279       | T             | 8             | 5            | 3             | 0:00.61                         |
| 280       | T             | 5             | 4            | 1             | 0:00.29                         |
| 281       | T             | 5             | 4            | 1             | 0:00.29                         |
| 282       | T             | 5             | 4            | 1             | 0:00.28                         |
| 283       | T             | 6             | 4            | 2             | 0:00.37                         |
| 284       | T             | 6             | 4            | 2             | 0:00.37                         |
| 285       | F             | 86            | 39           | 47            | 0:05.34                         |
| 286       | T             | 23            | 11           | 12            | 0:01.49                         |
| 287       | T             | 6             | 4            | 2             | 0:00.34                         |
| 288       | T             | 5             | 4            | 1             | 0:00.29                         |
| 289       | T             | 5             | 4            | 1             | 0:00.31                         |
| 290       | T             | 5             | 4            | 1             | 0:00.30                         |
| 291       | F             | 14            | 3            | 11            | 0:00.73                         |
| 292       | F             | 14            | 3            | 11            | 0:00.71                         |
| 293       | T             | 10            | 6            | 4             | 0:00.57                         |
| 294       | F             | 20            | 6            | 14            | 0:01.14                         |
| 295       | T             | 16            | 8            | 8             | 0:00.89                         |
| 296       | F             | 54            | 19           | 35            | 0:03.69                         |
| 297       | T             | 5             | 4            | 1             | 0:00.27                         |
| 298       | T             | 5             | 4            | 1             | 0:00.28                         |
| 299       | T             | 5             | 4            | 1             | 0:00.28                         |
| 300       | T             | 5             | 4            | 1             | 0:00.28                         |
| 301       | F             | 18            | 5            | 13            | 0:01.05                         |
| 302       | T             | 13            | 7            | 6             | 0:00.80                         |
| 303       | T             | 10            | 6            | 4             | 0:00.54                         |
| 304       | T             | 10            | 6            | 4             | 0:00.56                         |
| 305       | T             | 24            | 11           | 13            | 0:01.32                         |
| 306       | T             | 23            | 11           | 12            | 0:01.26                         |
| 307       | T             | 8             | 5            | 3             | 0:00.46                         |
| 308       | T             | 8             | 5            | 3             | 0:00.77                         |
| 309       | T             | 6             | 4            | 2             | 0:00.38                         |
| 310       | T             | 6             | 4            | 2             | 0:00.38                         |

| <b>Id</b> | <b>Result</b> | <b>#total</b> | <b>#true</b> | <b>#false</b> | <b>Execution time (min:sec)</b> |
|-----------|---------------|---------------|--------------|---------------|---------------------------------|
| 311       | T             | 6             | 4            | 2             | 0:00.38                         |
| 312       | T             | 11            | 6            | 5             | 0:00.76                         |
| 313       | T             | 16            | 8            | 8             | 0:00.85                         |
| 314       | T             | 16            | 8            | 8             | 0:00.84                         |
| 315       | T             | 23            | 11           | 12            | 0:01.36                         |
| 316       | T             | 5             | 4            | 1             | 0:00.29                         |
| 317       | T             | 5             | 4            | 1             | 0:00.30                         |
| 318       | T             | 5             | 4            | 1             | 0:00.30                         |
| 319       | T             | 28            | 13           | 15            | 0:01.73                         |
| 320       | F             | 10            | 1            | 9             | 0:00.67                         |
| 321       | T             | 21            | 10           | 11            | 0:01.58                         |
| 322       | T             | 23            | 11           | 12            | 0:01.52                         |
| 323       | F             | 38            | 13           | 25            | 0:02.14                         |
| 324       | F             | 24            | 8            | 16            | 0:01.41                         |
| 325       | T             | 37            | 16           | 21            | 0:02.27                         |
| 326       | T             | 37            | 16           | 21            | 0:02.62                         |
| 327       | T             | 10            | 6            | 4             | 0:00.67                         |
| 328       | T             | 10            | 6            | 4             | 0:00.66                         |
| 329       | F             | 23            | 7            | 16            | 0:01.46                         |
| 330       | T             | 26            | 12           | 14            | 0:01.53                         |
| 331       | F             | 52            | 22           | 30            | 0:03.27                         |
| 332       | F             | 14            | 3            | 11            | 0:00.78                         |
| 333       | T             | 44            | 19           | 25            | 0:02.63                         |
| 334       | T             | 11            | 6            | 5             | 0:00.72                         |
| 335       | T             | 11            | 6            | 5             | 0:00.70                         |
| 336       | T             | 19            | 9            | 10            | 0:01.06                         |
| 337       | F             | 10            | 1            | 9             | 0:00.68                         |
| 338       | T             | 42            | 18           | 24            | 0:02.49                         |
| 339       | T             | 39            | 17           | 22            | 0:02.13                         |
| 340       | T             | 8             | 5            | 3             | 0:00.56                         |
| 341       | T             | 8             | 5            | 3             | 0:00.54                         |
| 342       | T             | 8             | 5            | 3             | 0:00.44                         |
| 343       | T             | 8             | 5            | 3             | 0:00.43                         |
| 344       | T             | 18            | 9            | 9             | 0:01.13                         |
| 345       | T             | 6             | 4            | 2             | 0:00.34                         |
| 346       | T             | 6             | 4            | 2             | 0:00.34                         |
| 347       | F             | 28            | 10           | 18            | 0:01.66                         |
| 348       | T             | 16            | 8            | 8             | 0:00.87                         |
| 349       | T             | 5             | 4            | 1             | 0:00.29                         |
| 350       | T             | 5             | 4            | 1             | 0:00.29                         |
| 351       | T             | 49            | 21           | 28            | 0:02.83                         |
| 352       | T             | 5             | 4            | 1             | 0:00.28                         |
| 353       | T             | 5             | 4            | 1             | 0:00.28                         |
| 354       | T             | 5             | 4            | 1             | 0:00.28                         |
| 355       | T             | 5             | 4            | 1             | 0:00.28                         |
| 356       | T             | 5             | 4            | 1             | 0:00.31                         |
| 357       | T             | 5             | 4            | 1             | 0:00.30                         |
| 358       | T             | 5             | 4            | 1             | 0:00.29                         |

| <b>Id</b> | <b>Result</b> | <b>#total</b> | <b>#true</b> | <b>#false</b> | <b>Execution time (min:sec)</b> |
|-----------|---------------|---------------|--------------|---------------|---------------------------------|
| 359       | T             | 10            | 6            | 4             | 0:00.51                         |
| 360       | T             | 10            | 6            | 4             | 0:00.51                         |
| 361       | T             | 39            | 17           | 22            | 0:03.09                         |
| 362       | T             | 16            | 8            | 8             | 0:01.16                         |
| 363       | T             | 5             | 4            | 1             | 0:00.32                         |
| 364       | T             | 5             | 4            | 1             | 0:00.34                         |
| 365       | T             | 10            | 6            | 4             | 0:00.57                         |
| 366       | T             | 10            | 6            | 4             | 0:00.52                         |
| 367       | F             | 16            | 4            | 12            | 0:01.15                         |
| 368       | F             | 14            | 3            | 11            | 0:01.07                         |
| 369       | T             | 37            | 16           | 21            | 0:02.09                         |
| 370       | F             | 14            | 3            | 11            | 0:01.26                         |
| 371       | F             | 16            | 4            | 12            | 0:01.07                         |
| 372       | T             | 6             | 4            | 2             | 0:00.33                         |
| 373       | T             | 24            | 11           | 13            | 0:01.42                         |
| 374       | T             | 11            | 6            | 5             | 0:00.62                         |
| 375       | T             | 16            | 8            | 8             | 0:01.00                         |
| 376       | T             | 19            | 9            | 10            | 0:01.15                         |
| 377       | T             | 10            | 6            | 4             | 0:00.58                         |
| 378       | T             | 26            | 12           | 14            | 0:01.88                         |
| 379       | T             | 23            | 11           | 12            | 0:01.26                         |
| 380       | F             | 116           | 54           | 62            | 0:07.17                         |
| 381       | T             | 15            | 8            | 7             | 0:01.02                         |
| 382       | F             | 40            | 16           | 24            | 0:02.16                         |
| 383       | T             | 29            | 13           | 16            | 0:01.66                         |
| 384       | F             | 12            | 2            | 10            | 0:01.11                         |
| 385       | T             | 8             | 5            | 3             | 0:00.47                         |
| 386       | F             | 12            | 2            | 10            | 0:00.84                         |
| 387       | F             | 12            | 2            | 10            | 0:00.84                         |
| 388       | F             | 20            | 6            | 14            | 0:01.39                         |
| 389       | F             | 20            | 6            | 14            | 0:01.25                         |
| 390       | T             | 16            | 8            | 8             | 0:00.90                         |
| 391       | T             | 5             | 4            | 1             | 0:00.28                         |
| 392       | T             | 5             | 4            | 1             | 0:00.29                         |
| 393       | T             | 5             | 4            | 1             | 0:00.30                         |
| 394       | F             | 40            | 16           | 24            | 0:02.39                         |
| 395       | T             | 5             | 4            | 1             | 0:00.36                         |
| 396       | T             | 8             | 5            | 3             | 0:00.56                         |
| 397       | T             | 8             | 5            | 3             | 0:00.57                         |
| 398       | F             | 8             | 0            | 8             | 0:00.61                         |
| 399       | F             | 8             | 0            | 8             | 0:00.61                         |
| 400       | T             | 10            | 6            | 4             | 0:00.60                         |
| 401       | F             | 72            | 32           | 40            | 0:04.74                         |
| 402       | T             | 6             | 4            | 2             | 0:00.43                         |
| 403       | F             | 18            | 5            | 13            | 0:01.28                         |
| 404       | F             | 14            | 3            | 11            | 0:00.88                         |
| 405       | T             | 5             | 4            | 1             | 0:00.34                         |
| 406       | T             | 5             | 4            | 1             | 0:00.33                         |

| <b>Id</b> | <b>Result</b> | <b>#total</b> | <b>#true</b> | <b>#false</b> | <b>Execution time (min:sec)</b> |
|-----------|---------------|---------------|--------------|---------------|---------------------------------|
| 407       | T             | 6             | 4            | 2             | 0:00.64                         |
| 408       | T             | 6             | 4            | 2             | 0:00.64                         |
| 409       | F             | 33            | 11           | 22            | 0:02.12                         |
| 410       | T             | 16            | 8            | 8             | 0:00.88                         |
| 411       | F             | 20            | 6            | 14            | 0:01.26                         |
| 412       | T             | 11            | 6            | 5             | 0:00.76                         |
| 413       | T             | 19            | 9            | 10            | 0:01.08                         |
| 414       | F             | 42            | 17           | 25            | 0:02.67                         |
| 415       | T             | 26            | 12           | 14            | 0:01.35                         |
| 416       | T             | 23            | 11           | 12            | 0:01.18                         |
| 417       | T             | 8             | 5            | 3             | 0:00.49                         |
| 418       | T             | 19            | 9            | 10            | 0:01.04                         |
| 419       | F             | 18            | 5            | 13            | 0:01.09                         |
| 420       | T             | 28            | 13           | 15            | 0:01.47                         |
| 421       | T             | 8             | 5            | 3             | 0:00.46                         |
| 422       | T             | 8             | 5            | 3             | 0:00.47                         |
| 423       | T             | 8             | 5            | 3             | 0:00.47                         |
| 424       | F             | 40            | 16           | 24            | 0:02.46                         |
| 425       | F             | 20            | 6            | 14            | 0:01.30                         |
| 426       | T             | 21            | 10           | 11            | 0:01.12                         |
| 427       | T             | 6             | 4            | 2             | 0:00.40                         |
| 428       | T             | 6             | 4            | 2             | 0:00.40                         |
| 429       | T             | 37            | 16           | 21            | 0:02.48                         |
| 430       | T             | 15            | 8            | 7             | 0:00.79                         |
| 431       | T             | 6             | 4            | 2             | 0:00.36                         |
| 432       | T             | 6             | 4            | 2             | 0:00.37                         |
| 433       | F             | 106           | 51           | 55            | 0:07.82                         |
| 434       | T             | 15            | 8            | 7             | 0:00.90                         |
| 435       | T             | 19            | 9            | 10            | 0:01.15                         |
| 436       | F             | 26            | 9            | 17            | 0:01.56                         |
| 437       | F             | 18            | 5            | 13            | 0:01.13                         |
| 438       | T             | 36            | 16           | 20            | 0:01.84                         |
| 439       | T             | 10            | 6            | 4             | 0:00.59                         |
| 440       | T             | 24            | 11           | 13            | 0:01.34                         |
| 441       | T             | 8             | 5            | 3             | 0:00.46                         |
| 442       | T             | 6             | 4            | 2             | 0:00.40                         |
| 443       | T             | 6             | 4            | 2             | 0:00.41                         |
| 444       | T             | 13            | 7            | 6             | 0:00.74                         |
| 445       | T             | 13            | 7            | 6             | 0:00.73                         |
| 446       | T             | 16            | 8            | 8             | 0:00.93                         |
| 447       | T             | 6             | 4            | 2             | 0:00.42                         |
| 448       | T             | 6             | 4            | 2             | 0:00.40                         |
| 449       | T             | 5             | 4            | 1             | 0:00.35                         |
| 450       | T             | 5             | 4            | 1             | 0:00.37                         |
| 451       | T             | 16            | 8            | 8             | 0:00.93                         |
| 452       | T             | 42            | 18           | 24            | 0:02.67                         |
| 453       | T             | 5             | 4            | 1             | 0:00.33                         |
| 454       | T             | 11            | 6            | 5             | 0:00.72                         |

| <b>Id</b> | <b>Result</b> | <b>#total</b> | <b>#true</b> | <b>#false</b> | <b>Execution time (min:sec)</b> |
|-----------|---------------|---------------|--------------|---------------|---------------------------------|
| 455       | T             | 11            | 6            | 5             | 0:00.75                         |
| 456       | T             | 24            | 11           | 13            | 0:01.44                         |
| 457       | T             | 39            | 17           | 22            | 0:02.04                         |
| 458       | T             | 6             | 4            | 2             | 0:00.36                         |
| 459       | T             | 6             | 4            | 2             | 0:00.37                         |
| 460       | T             | 6             | 4            | 2             | 0:00.37                         |
| 461       | T             | 18            | 9            | 9             | 0:01.04                         |
| 462       | F             | 16            | 4            | 12            | 0:01.03                         |
| 463       | T             | 5             | 4            | 1             | 0:00.38                         |
| 464       | T             | 5             | 4            | 1             | 0:00.36                         |
| 465       | T             | 49            | 21           | 28            | 0:03.19                         |
| 466       | F             | 12            | 2            | 10            | 0:01.23                         |
| 467       | F             | 18            | 5            | 13            | 0:01.71                         |
| 468       | F             | 18            | 5            | 13            | 0:01.36                         |
| 469       | F             | 10            | 1            | 9             | 0:01.15                         |
| 470       | T             | 18            | 9            | 9             | 0:00.95                         |
| 471       | T             | 16            | 8            | 8             | 0:00.96                         |
| 472       | T             | 21            | 10           | 11            | 0:01.27                         |
| 473       | T             | 6             | 4            | 2             | 0:00.44                         |
| 474       | T             | 6             | 4            | 2             | 0:00.46                         |
| 475       | T             | 6             | 4            | 2             | 0:00.46                         |
| 476       | F             | 28            | 9            | 19            | 0:02.24                         |
| 477       | T             | 18            | 9            | 9             | 0:01.55                         |
| 478       | T             | 6             | 4            | 2             | 0:00.68                         |
| 479       | T             | 6             | 4            | 2             | 0:00.68                         |
| 480       | T             | 19            | 9            | 10            | 0:01.07                         |
| 481       | F             | 67            | 24           | 43            | 0:04.33                         |
| 482       | F             | 16            | 4            | 12            | 0:00.90                         |
| 483       | T             | 19            | 9            | 10            | 0:01.07                         |
| 484       | F             | 24            | 8            | 16            | 0:01.66                         |
| 485       | T             | 11            | 6            | 5             | 0:00.67                         |
| 486       | F             | 12            | 2            | 10            | 0:01.69                         |
| 487       | T             | 10            | 6            | 4             | 0:00.73                         |
| 488       | T             | 10            | 6            | 4             | 0:00.75                         |
| 489       | T             | 21            | 10           | 11            | 0:01.26                         |
| 490       | T             | 16            | 8            | 8             | 0:00.96                         |
| 491       | T             | 5             | 4            | 1             | 0:00.29                         |
| 492       | T             | 16            | 8            | 8             | 0:00.93                         |
| 493       | F             | 25            | 8            | 17            | 0:01.50                         |
| 494       | F             | 25            | 8            | 17            | 0:01.38                         |
| 495       | T             | 6             | 4            | 2             | 0:00.42                         |
| 496       | T             | 6             | 4            | 2             | 0:00.41                         |
| 497       | T             | 6             | 4            | 2             | 0:00.41                         |
| 498       | T             | 6             | 4            | 2             | 0:00.38                         |
| 499       | T             | 6             | 4            | 2             | 0:00.39                         |
| 500       | F             | 20            | 6            | 14            | 0:01.20                         |

Table 6: Model checking results corresponding to logic property 6

| <b>Id</b> | <b>Result</b> | <b>#total</b> | <b>#true</b> | <b>#false</b> | <b>Execution time (min:sec)</b> |
|-----------|---------------|---------------|--------------|---------------|---------------------------------|
| 1         | T             | 1000          | 11           | 989           | 0:41.32                         |
| 2         | T             | 1000          | 11           | 989           | 0:39.72                         |
| 3         | T             | 1000          | 11           | 989           | 0:39.46                         |
| 4         | T             | 1000          | 11           | 989           | 0:48.18                         |
| 5         | T             | 1000          | 11           | 989           | 0:41.36                         |
| 6         | T             | 1000          | 11           | 989           | 0:38.96                         |
| 7         | T             | 1000          | 11           | 989           | 0:41.37                         |
| 8         | T             | 1000          | 11           | 989           | 0:40.89                         |
| 9         | T             | 1000          | 11           | 989           | 0:35.92                         |
| 10        | T             | 1000          | 11           | 989           | 0:43.91                         |
| 11        | T             | 1000          | 11           | 989           | 0:39.15                         |
| 12        | T             | 1000          | 11           | 989           | 0:37.19                         |
| 13        | T             | 1000          | 11           | 989           | 0:43.43                         |
| 14        | T             | 1000          | 11           | 989           | 0:53.38                         |
| 15        | T             | 1000          | 11           | 989           | 0:37.08                         |
| 16        | T             | 1000          | 11           | 989           | 0:52.87                         |
| 17        | T             | 1000          | 11           | 989           | 0:36.61                         |
| 18        | T             | 1000          | 11           | 989           | 0:38.96                         |
| 19        | T             | 1000          | 11           | 989           | 0:44.88                         |
| 20        | T             | 1000          | 11           | 989           | 0:55.87                         |
| 21        | T             | 1000          | 11           | 989           | 0:55.22                         |
| 22        | T             | 1000          | 11           | 989           | 0:40.70                         |
| 23        | T             | 1000          | 11           | 989           | 0:39.83                         |
| 24        | T             | 1000          | 11           | 989           | 0:55.58                         |
| 25        | T             | 1000          | 11           | 989           | 0:42.43                         |
| 26        | T             | 1000          | 11           | 989           | 0:52.55                         |
| 27        | T             | 1000          | 11           | 989           | 0:40.71                         |
| 28        | T             | 1000          | 11           | 989           | 0:40.82                         |
| 29        | T             | 1000          | 11           | 989           | 0:47.45                         |
| 30        | T             | 1000          | 11           | 989           | 1:02.97                         |
| 31        | T             | 1000          | 11           | 989           | 0:36.39                         |
| 32        | T             | 1000          | 11           | 989           | 0:22.61                         |
| 33        | T             | 1000          | 11           | 989           | 0:41.99                         |
| 34        | T             | 1000          | 11           | 989           | 0:37.28                         |
| 35        | T             | 1000          | 11           | 989           | 0:59.43                         |
| 36        | T             | 1000          | 11           | 989           | 0:38.45                         |
| 37        | T             | 1000          | 11           | 989           | 0:40.98                         |
| 38        | T             | 1000          | 11           | 989           | 0:40.70                         |
| 39        | T             | 1000          | 11           | 989           | 0:54.73                         |
| 40        | T             | 1000          | 11           | 989           | 0:25.91                         |
| 41        | T             | 1000          | 11           | 989           | 0:41.81                         |
| 42        | T             | 1000          | 11           | 989           | 0:35.81                         |
| 43        | T             | 1000          | 11           | 989           | 0:51.26                         |
| 44        | T             | 1000          | 11           | 989           | 0:52.38                         |
| 45        | T             | 1000          | 11           | 989           | 0:49.41                         |
| 46        | T             | 1000          | 11           | 989           | 0:35.31                         |



| <b>Id</b> | <b>Result</b> | <b>#total</b> | <b>#true</b> | <b>#false</b> | <b>Execution time (min:sec)</b> |
|-----------|---------------|---------------|--------------|---------------|---------------------------------|
| 47        | T             | 1000          | 11           | 989           | 0:42.05                         |
| 48        | T             | 1000          | 11           | 989           | 0:40.83                         |
| 49        | T             | 1000          | 11           | 989           | 0:53.05                         |
| 50        | T             | 1000          | 11           | 989           | 0:52.20                         |
| 51        | T             | 1000          | 11           | 989           | 0:40.80                         |
| 52        | T             | 1000          | 11           | 989           | 0:39.29                         |
| 53        | T             | 1000          | 11           | 989           | 0:55.80                         |
| 54        | T             | 1000          | 11           | 989           | 0:48.61                         |
| 55        | T             | 1000          | 11           | 989           | 0:42.14                         |
| 56        | T             | 1000          | 11           | 989           | 0:43.06                         |
| 57        | T             | 1000          | 11           | 989           | 0:32.14                         |
| 58        | T             | 1000          | 11           | 989           | 0:43.89                         |
| 59        | T             | 1000          | 11           | 989           | 1:00.00                         |
| 60        | T             | 1000          | 11           | 989           | 0:47.06                         |
| 61        | T             | 1000          | 11           | 989           | 0:40.72                         |
| 62        | T             | 1000          | 11           | 989           | 0:47.34                         |
| 63        | T             | 1000          | 11           | 989           | 0:41.20                         |
| 64        | T             | 1000          | 11           | 989           | 1:00.49                         |
| 65        | T             | 1000          | 11           | 989           | 0:27.72                         |
| 66        | T             | 1000          | 11           | 989           | 1:00.59                         |
| 67        | T             | 1000          | 11           | 989           | 0:47.27                         |
| 68        | T             | 1000          | 11           | 989           | 0:41.02                         |
| 69        | T             | 1000          | 11           | 989           | 0:54.78                         |
| 70        | T             | 1000          | 11           | 989           | 0:46.59                         |
| 71        | T             | 1000          | 11           | 989           | 0:48.29                         |
| 72        | T             | 1000          | 11           | 989           | 0:40.79                         |
| 73        | T             | 1000          | 11           | 989           | 0:58.97                         |
| 74        | T             | 1000          | 11           | 989           | 0:37.76                         |
| 75        | T             | 1000          | 11           | 989           | 0:53.19                         |
| 76        | T             | 1000          | 11           | 989           | 0:55.39                         |
| 77        | T             | 1000          | 11           | 989           | 0:38.76                         |
| 78        | T             | 1000          | 11           | 989           | 0:40.05                         |
| 79        | T             | 1000          | 11           | 989           | 0:42.99                         |
| 80        | T             | 1000          | 11           | 989           | 0:48.14                         |
| 81        | T             | 1000          | 11           | 989           | 0:38.39                         |
| 82        | T             | 1000          | 11           | 989           | 0:51.41                         |
| 83        | T             | 1000          | 11           | 989           | 0:32.89                         |
| 84        | T             | 1000          | 11           | 989           | 0:48.53                         |
| 85        | T             | 1000          | 11           | 989           | 0:54.04                         |
| 86        | T             | 1000          | 11           | 989           | 0:53.03                         |
| 87        | T             | 1000          | 11           | 989           | 1:05.00                         |
| 88        | T             | 1000          | 11           | 989           | 0:55.61                         |
| 89        | T             | 1000          | 11           | 989           | 0:42.16                         |
| 90        | T             | 1000          | 11           | 989           | 0:38.52                         |
| 91        | T             | 1000          | 11           | 989           | 0:43.55                         |
| 92        | T             | 1000          | 11           | 989           | 0:38.73                         |
| 93        | T             | 1000          | 11           | 989           | 0:46.47                         |
| 94        | T             | 1000          | 11           | 989           | 0:39.56                         |

| <b>Id</b> | <b>Result</b> | <b>#total</b> | <b>#true</b> | <b>#false</b> | <b>Execution time (min:sec)</b> |
|-----------|---------------|---------------|--------------|---------------|---------------------------------|
| 95        | T             | 1000          | 11           | 989           | 0:53.79                         |
| 96        | T             | 1000          | 11           | 989           | 0:46.24                         |
| 97        | T             | 1000          | 11           | 989           | 0:45.05                         |
| 98        | T             | 1000          | 11           | 989           | 1:03.33                         |
| 99        | T             | 1000          | 11           | 989           | 0:35.24                         |
| 100       | T             | 1000          | 11           | 989           | 0:52.57                         |
| 101       | T             | 1000          | 11           | 989           | 1:01.35                         |
| 102       | T             | 1000          | 11           | 989           | 0:40.84                         |
| 103       | T             | 1000          | 11           | 989           | 0:41.14                         |
| 104       | T             | 1000          | 11           | 989           | 1:03.93                         |
| 105       | T             | 1000          | 11           | 989           | 0:46.63                         |
| 106       | T             | 1000          | 11           | 989           | 0:45.25                         |
| 107       | T             | 1000          | 11           | 989           | 0:29.18                         |
| 108       | T             | 1000          | 11           | 989           | 1:01.75                         |
| 109       | T             | 293           | 0            | 293           | 0:12.04                         |
| 110       | T             | 1000          | 11           | 989           | 0:35.30                         |
| 111       | T             | 1000          | 11           | 989           | 0:37.13                         |
| 112       | T             | 1000          | 11           | 989           | 0:36.44                         |
| 113       | T             | 1000          | 11           | 989           | 0:36.81                         |
| 114       | T             | 1000          | 11           | 989           | 0:33.46                         |
| 115       | T             | 1000          | 11           | 989           | 0:42.30                         |
| 116       | T             | 1000          | 11           | 989           | 0:40.34                         |
| 117       | T             | 1000          | 11           | 989           | 0:58.38                         |
| 118       | T             | 1000          | 11           | 989           | 0:55.53                         |
| 119       | T             | 1000          | 11           | 989           | 1:07.23                         |
| 120       | T             | 1000          | 11           | 989           | 0:26.69                         |
| 121       | T             | 1000          | 11           | 989           | 1:06.48                         |
| 122       | T             | 1000          | 11           | 989           | 0:42.96                         |
| 123       | T             | 1000          | 11           | 989           | 0:46.80                         |
| 124       | T             | 1000          | 11           | 989           | 1:01.48                         |
| 125       | T             | 1000          | 11           | 989           | 0:41.47                         |
| 126       | T             | 1000          | 11           | 989           | 0:49.31                         |
| 127       | T             | 1000          | 11           | 989           | 0:41.30                         |
| 128       | T             | 1000          | 11           | 989           | 1:07.01                         |
| 129       | T             | 1000          | 11           | 989           | 0:51.80                         |
| 130       | T             | 1000          | 11           | 989           | 0:46.19                         |
| 131       | T             | 1000          | 11           | 989           | 0:42.41                         |
| 132       | T             | 1000          | 11           | 989           | 0:52.81                         |
| 133       | T             | 1000          | 11           | 989           | 0:47.86                         |
| 134       | T             | 1000          | 11           | 989           | 0:40.53                         |
| 135       | T             | 1000          | 11           | 989           | 0:52.21                         |
| 136       | T             | 1000          | 11           | 989           | 0:40.60                         |
| 137       | T             | 1000          | 11           | 989           | 0:40.59                         |
| 138       | T             | 1000          | 11           | 989           | 0:43.21                         |
| 139       | T             | 1000          | 11           | 989           | 0:40.02                         |
| 140       | T             | 1000          | 11           | 989           | 0:42.25                         |
| 141       | T             | 1000          | 11           | 989           | 0:39.85                         |
| 142       | T             | 1000          | 11           | 989           | 0:48.07                         |

| <b>Id</b> | <b>Result</b> | <b>#total</b> | <b>#true</b> | <b>#false</b> | <b>Execution time (min:sec)</b> |
|-----------|---------------|---------------|--------------|---------------|---------------------------------|
| 143       | T             | 1000          | 11           | 989           | 0:41.23                         |
| 144       | T             | 1000          | 11           | 989           | 0:35.28                         |
| 145       | T             | 1000          | 11           | 989           | 0:40.04                         |
| 146       | T             | 1000          | 11           | 989           | 0:54.04                         |
| 147       | T             | 1000          | 11           | 989           | 0:47.68                         |
| 148       | T             | 1000          | 11           | 989           | 0:39.60                         |
| 149       | T             | 1000          | 11           | 989           | 0:46.94                         |
| 150       | T             | 1000          | 11           | 989           | 0:36.30                         |
| 151       | T             | 1000          | 11           | 989           | 0:44.11                         |
| 152       | T             | 1000          | 11           | 989           | 0:38.62                         |
| 153       | T             | 1000          | 11           | 989           | 0:42.76                         |
| 154       | T             | 1000          | 11           | 989           | 0:41.00                         |
| 155       | T             | 1000          | 11           | 989           | 0:34.57                         |
| 156       | T             | 1000          | 11           | 989           | 0:45.69                         |
| 157       | T             | 1000          | 11           | 989           | 1:05.75                         |
| 158       | T             | 1000          | 11           | 989           | 0:52.71                         |
| 159       | T             | 1000          | 11           | 989           | 0:33.69                         |
| 160       | T             | 1000          | 11           | 989           | 0:45.20                         |
| 161       | T             | 1000          | 11           | 989           | 0:41.52                         |
| 162       | T             | 1000          | 11           | 989           | 0:50.47                         |
| 163       | T             | 1000          | 11           | 989           | 0:33.60                         |
| 164       | T             | 1000          | 11           | 989           | 0:42.17                         |
| 165       | T             | 1000          | 11           | 989           | 0:48.77                         |
| 166       | T             | 1000          | 11           | 989           | 0:32.97                         |
| 167       | T             | 1000          | 11           | 989           | 0:45.43                         |
| 168       | T             | 1000          | 11           | 989           | 0:36.27                         |
| 169       | T             | 1000          | 11           | 989           | 0:49.64                         |
| 170       | T             | 1000          | 11           | 989           | 0:51.75                         |
| 171       | T             | 1000          | 11           | 989           | 0:40.14                         |
| 172       | T             | 1000          | 11           | 989           | 0:41.04                         |
| 173       | T             | 1000          | 11           | 989           | 0:57.10                         |
| 174       | T             | 1000          | 11           | 989           | 0:27.11                         |
| 175       | T             | 1000          | 11           | 989           | 0:41.97                         |
| 176       | T             | 1000          | 11           | 989           | 0:47.45                         |
| 177       | T             | 1000          | 11           | 989           | 0:41.53                         |
| 178       | T             | 1000          | 11           | 989           | 0:54.98                         |
| 179       | T             | 1000          | 11           | 989           | 0:58.37                         |
| 180       | T             | 1000          | 11           | 989           | 0:58.20                         |
| 181       | T             | 1000          | 11           | 989           | 1:05.78                         |
| 182       | T             | 1000          | 11           | 989           | 0:41.49                         |
| 183       | T             | 1000          | 11           | 989           | 0:31.71                         |
| 184       | T             | 1000          | 11           | 989           | 1:00.14                         |
| 185       | T             | 1000          | 11           | 989           | 0:52.87                         |
| 186       | T             | 1000          | 11           | 989           | 0:40.97                         |
| 187       | T             | 1000          | 11           | 989           | 0:34.34                         |
| 188       | T             | 1000          | 11           | 989           | 0:43.38                         |
| 189       | T             | 1000          | 11           | 989           | 0:43.65                         |
| 190       | T             | 1000          | 11           | 989           | 0:46.79                         |

| <b>Id</b> | <b>Result</b> | <b>#total</b> | <b>#true</b> | <b>#false</b> | <b>Execution time (min:sec)</b> |
|-----------|---------------|---------------|--------------|---------------|---------------------------------|
| 191       | T             | 1000          | 11           | 989           | 0:37.04                         |
| 192       | T             | 1000          | 11           | 989           | 0:41.05                         |
| 193       | T             | 1000          | 11           | 989           | 0:49.64                         |
| 194       | T             | 1000          | 11           | 989           | 0:41.32                         |
| 195       | T             | 1000          | 11           | 989           | 0:43.21                         |
| 196       | T             | 1000          | 11           | 989           | 0:41.89                         |
| 197       | T             | 1000          | 11           | 989           | 0:47.62                         |
| 198       | T             | 1000          | 11           | 989           | 0:42.99                         |
| 199       | T             | 1000          | 11           | 989           | 0:39.31                         |
| 200       | T             | 1000          | 11           | 989           | 0:35.83                         |
| 201       | T             | 1000          | 11           | 989           | 0:38.33                         |
| 202       | T             | 1000          | 11           | 989           | 0:42.37                         |
| 203       | T             | 1000          | 11           | 989           | 0:48.41                         |
| 204       | T             | 1000          | 11           | 989           | 0:43.99                         |
| 205       | T             | 1000          | 11           | 989           | 0:44.64                         |
| 206       | T             | 1000          | 11           | 989           | 0:48.65                         |
| 207       | T             | 1000          | 11           | 989           | 0:42.39                         |
| 208       | T             | 1000          | 11           | 989           | 0:47.12                         |
| 209       | T             | 1000          | 11           | 989           | 0:56.16                         |
| 210       | T             | 1000          | 11           | 989           | 0:41.27                         |
| 211       | T             | 1000          | 11           | 989           | 0:57.63                         |
| 212       | T             | 1000          | 11           | 989           | 0:42.43                         |
| 213       | T             | 1000          | 11           | 989           | 0:33.27                         |
| 214       | T             | 1000          | 11           | 989           | 0:50.85                         |
| 215       | T             | 1000          | 11           | 989           | 0:29.22                         |
| 216       | T             | 1000          | 11           | 989           | 0:42.68                         |
| 217       | T             | 1000          | 11           | 989           | 0:41.52                         |
| 218       | T             | 1000          | 11           | 989           | 0:40.66                         |
| 219       | T             | 1000          | 11           | 989           | 0:42.01                         |
| 220       | T             | 1000          | 11           | 989           | 0:52.82                         |
| 221       | F             | 94            | 6            | 88            | 0:04.02                         |
| 222       | T             | 1000          | 11           | 989           | 0:35.71                         |
| 223       | T             | 1000          | 11           | 989           | 0:49.06                         |
| 224       | T             | 1000          | 11           | 989           | 0:40.91                         |
| 225       | T             | 1000          | 11           | 989           | 0:56.13                         |
| 226       | T             | 1000          | 11           | 989           | 1:02.99                         |
| 227       | T             | 1000          | 11           | 989           | 0:45.48                         |
| 228       | T             | 1000          | 11           | 989           | 0:40.81                         |
| 229       | T             | 1000          | 11           | 989           | 0:42.18                         |
| 230       | T             | 1000          | 11           | 989           | 0:38.68                         |
| 231       | T             | 1000          | 11           | 989           | 0:58.03                         |
| 232       | T             | 1000          | 11           | 989           | 0:30.94                         |
| 233       | T             | 1000          | 11           | 989           | 0:28.33                         |
| 234       | T             | 1000          | 11           | 989           | 0:34.53                         |
| 235       | T             | 1000          | 11           | 989           | 0:41.32                         |
| 236       | T             | 1000          | 11           | 989           | 0:50.15                         |
| 237       | T             | 1000          | 11           | 989           | 0:41.50                         |
| 238       | T             | 1000          | 11           | 989           | 0:37.61                         |

| <b>Id</b> | <b>Result</b> | <b>#total</b> | <b>#true</b> | <b>#false</b> | <b>Execution time (min:sec)</b> |
|-----------|---------------|---------------|--------------|---------------|---------------------------------|
| 239       | T             | 1000          | 11           | 989           | 0:29.01                         |
| 240       | T             | 1000          | 11           | 989           | 0:59.08                         |
| 241       | T             | 1000          | 11           | 989           | 0:41.20                         |
| 242       | T             | 1000          | 11           | 989           | 0:52.59                         |
| 243       | T             | 1000          | 11           | 989           | 0:41.41                         |
| 244       | T             | 1000          | 11           | 989           | 0:39.87                         |
| 245       | T             | 1000          | 11           | 989           | 1:00.68                         |
| 246       | T             | 1000          | 11           | 989           | 0:42.71                         |
| 247       | T             | 1000          | 11           | 989           | 0:48.53                         |
| 248       | T             | 1000          | 11           | 989           | 0:30.68                         |
| 249       | T             | 1000          | 11           | 989           | 0:52.62                         |
| 250       | T             | 1000          | 11           | 989           | 0:42.90                         |
| 251       | T             | 1000          | 11           | 989           | 0:40.60                         |
| 252       | T             | 1000          | 11           | 989           | 0:46.33                         |
| 253       | T             | 1000          | 11           | 989           | 0:40.86                         |
| 254       | T             | 1000          | 11           | 989           | 0:45.90                         |
| 255       | T             | 1000          | 11           | 989           | 0:51.55                         |
| 256       | T             | 1000          | 11           | 989           | 0:51.79                         |
| 257       | T             | 1000          | 11           | 989           | 0:57.92                         |
| 258       | T             | 1000          | 11           | 989           | 0:43.25                         |
| 259       | T             | 1000          | 11           | 989           | 0:45.58                         |
| 260       | T             | 1000          | 11           | 989           | 0:28.87                         |
| 261       | T             | 1000          | 11           | 989           | 0:34.70                         |
| 262       | T             | 1000          | 11           | 989           | 0:40.48                         |
| 263       | T             | 1000          | 11           | 989           | 0:49.35                         |
| 264       | T             | 1000          | 11           | 989           | 0:36.18                         |
| 265       | T             | 1000          | 11           | 989           | 0:37.38                         |
| 266       | T             | 1000          | 11           | 989           | 0:38.25                         |
| 267       | T             | 1000          | 11           | 989           | 0:37.98                         |
| 268       | T             | 1000          | 11           | 989           | 0:43.93                         |
| 269       | T             | 1000          | 11           | 989           | 0:40.55                         |
| 270       | T             | 1000          | 11           | 989           | 0:41.22                         |
| 271       | T             | 1000          | 11           | 989           | 0:41.31                         |
| 272       | T             | 1000          | 11           | 989           | 0:41.73                         |
| 273       | T             | 1000          | 11           | 989           | 0:48.39                         |
| 274       | T             | 1000          | 11           | 989           | 0:41.76                         |
| 275       | T             | 1000          | 11           | 989           | 0:38.76                         |
| 276       | T             | 1000          | 11           | 989           | 0:36.67                         |
| 277       | T             | 1000          | 11           | 989           | 0:39.94                         |
| 278       | T             | 1000          | 11           | 989           | 0:40.94                         |
| 279       | T             | 1000          | 11           | 989           | 0:53.25                         |
| 280       | T             | 1000          | 11           | 989           | 0:35.72                         |
| 281       | T             | 1000          | 11           | 989           | 0:44.33                         |
| 282       | T             | 1000          | 11           | 989           | 0:41.69                         |
| 283       | T             | 1000          | 11           | 989           | 0:35.15                         |
| 284       | T             | 1000          | 11           | 989           | 0:46.34                         |
| 285       | T             | 1000          | 11           | 989           | 0:48.94                         |
| 286       | T             | 1000          | 11           | 989           | 0:40.25                         |

| <b>Id</b> | <b>Result</b> | <b>#total</b> | <b>#true</b> | <b>#false</b> | <b>Execution time (min:sec)</b> |
|-----------|---------------|---------------|--------------|---------------|---------------------------------|
| 287       | T             | 1000          | 11           | 989           | 0:42.03                         |
| 288       | T             | 1000          | 11           | 989           | 0:33.59                         |
| 289       | T             | 1000          | 11           | 989           | 0:33.54                         |
| 290       | T             | 1000          | 11           | 989           | 0:48.38                         |
| 291       | T             | 1000          | 11           | 989           | 0:28.99                         |
| 292       | T             | 1000          | 11           | 989           | 0:38.39                         |
| 293       | T             | 1000          | 11           | 989           | 0:45.72                         |
| 294       | T             | 1000          | 11           | 989           | 0:39.48                         |
| 295       | T             | 1000          | 11           | 989           | 0:40.49                         |
| 296       | T             | 1000          | 11           | 989           | 0:55.39                         |
| 297       | T             | 293           | 0            | 293           | 0:12.24                         |
| 298       | T             | 1000          | 11           | 989           | 0:32.57                         |
| 299       | T             | 1000          | 11           | 989           | 0:35.95                         |
| 300       | T             | 1000          | 11           | 989           | 0:41.50                         |
| 301       | T             | 293           | 0            | 293           | 0:12.24                         |
| 302       | T             | 1000          | 11           | 989           | 1:00.11                         |
| 303       | T             | 1000          | 11           | 989           | 0:51.97                         |
| 304       | T             | 1000          | 11           | 989           | 0:43.99                         |
| 305       | T             | 1000          | 11           | 989           | 0:35.95                         |
| 306       | T             | 1000          | 11           | 989           | 1:06.49                         |
| 307       | T             | 1000          | 11           | 989           | 0:55.31                         |
| 308       | T             | 1000          | 11           | 989           | 0:52.45                         |
| 309       | T             | 1000          | 11           | 989           | 0:35.76                         |
| 310       | T             | 1000          | 11           | 989           | 0:42.56                         |
| 311       | T             | 1000          | 11           | 989           | 0:40.98                         |
| 312       | T             | 1000          | 11           | 989           | 0:36.11                         |
| 313       | T             | 1000          | 11           | 989           | 0:44.60                         |
| 314       | T             | 293           | 0            | 293           | 0:17.02                         |
| 315       | T             | 1000          | 11           | 989           | 0:52.70                         |
| 316       | T             | 1000          | 11           | 989           | 0:44.84                         |
| 317       | T             | 1000          | 11           | 989           | 0:44.25                         |
| 318       | T             | 1000          | 11           | 989           | 0:40.73                         |
| 319       | T             | 1000          | 11           | 989           | 1:04.22                         |
| 320       | T             | 1000          | 11           | 989           | 0:40.66                         |
| 321       | T             | 1000          | 11           | 989           | 0:40.95                         |
| 322       | T             | 1000          | 11           | 989           | 0:51.59                         |
| 323       | T             | 1000          | 11           | 989           | 0:40.93                         |
| 324       | T             | 1000          | 11           | 989           | 0:38.02                         |
| 325       | T             | 1000          | 11           | 989           | 0:46.17                         |
| 326       | T             | 1000          | 11           | 989           | 0:47.51                         |
| 327       | T             | 1000          | 11           | 989           | 0:55.26                         |
| 328       | T             | 1000          | 11           | 989           | 0:26.86                         |
| 329       | T             | 1000          | 11           | 989           | 0:37.05                         |
| 330       | T             | 1000          | 11           | 989           | 0:44.19                         |
| 331       | T             | 1000          | 11           | 989           | 0:33.52                         |
| 332       | T             | 1000          | 11           | 989           | 0:54.91                         |
| 333       | T             | 1000          | 11           | 989           | 0:52.75                         |
| 334       | T             | 1000          | 11           | 989           | 0:39.04                         |

| <b>Id</b> | <b>Result</b> | <b>#total</b> | <b>#true</b> | <b>#false</b> | <b>Execution time (min:sec)</b> |
|-----------|---------------|---------------|--------------|---------------|---------------------------------|
| 335       | T             | 1000          | 11           | 989           | 0:38.70                         |
| 336       | T             | 1000          | 11           | 989           | 0:42.68                         |
| 337       | T             | 1000          | 11           | 989           | 0:53.67                         |
| 338       | T             | 1000          | 11           | 989           | 0:42.58                         |
| 339       | T             | 1000          | 11           | 989           | 0:52.63                         |
| 340       | T             | 1000          | 11           | 989           | 0:50.94                         |
| 341       | T             | 1000          | 11           | 989           | 0:48.77                         |
| 342       | T             | 1000          | 11           | 989           | 0:52.53                         |
| 343       | T             | 1000          | 11           | 989           | 0:41.66                         |
| 344       | T             | 1000          | 11           | 989           | 0:43.76                         |
| 345       | T             | 1000          | 11           | 989           | 0:41.06                         |
| 346       | T             | 1000          | 11           | 989           | 0:48.31                         |
| 347       | T             | 1000          | 11           | 989           | 0:48.84                         |
| 348       | T             | 1000          | 11           | 989           | 0:48.37                         |
| 349       | T             | 1000          | 11           | 989           | 0:37.79                         |
| 350       | T             | 1000          | 11           | 989           | 0:38.60                         |
| 351       | T             | 1000          | 11           | 989           | 0:39.55                         |
| 352       | T             | 1000          | 11           | 989           | 0:51.49                         |
| 353       | T             | 1000          | 11           | 989           | 0:32.62                         |
| 354       | T             | 1000          | 11           | 989           | 0:41.41                         |
| 355       | T             | 1000          | 11           | 989           | 0:42.03                         |
| 356       | T             | 1000          | 11           | 989           | 0:40.83                         |
| 357       | T             | 1000          | 11           | 989           | 1:05.89                         |
| 358       | T             | 1000          | 11           | 989           | 0:35.40                         |
| 359       | T             | 1000          | 11           | 989           | 0:32.31                         |
| 360       | T             | 1000          | 11           | 989           | 0:56.55                         |
| 361       | T             | 293           | 0            | 293           | 0:18.66                         |
| 362       | T             | 1000          | 11           | 989           | 0:41.61                         |
| 363       | T             | 1000          | 11           | 989           | 0:34.19                         |
| 364       | T             | 1000          | 11           | 989           | 1:00.16                         |
| 365       | T             | 1000          | 11           | 989           | 0:53.72                         |
| 366       | T             | 1000          | 11           | 989           | 0:41.11                         |
| 367       | T             | 1000          | 11           | 989           | 0:40.50                         |
| 368       | T             | 1000          | 11           | 989           | 0:40.37                         |
| 369       | T             | 1000          | 11           | 989           | 0:46.72                         |
| 370       | T             | 1000          | 11           | 989           | 0:42.22                         |
| 371       | T             | 1000          | 11           | 989           | 0:42.78                         |
| 372       | T             | 1000          | 11           | 989           | 0:54.06                         |
| 373       | T             | 1000          | 11           | 989           | 0:56.39                         |
| 374       | T             | 1000          | 11           | 989           | 0:47.68                         |
| 375       | T             | 1000          | 11           | 989           | 0:39.49                         |
| 376       | T             | 1000          | 11           | 989           | 0:38.38                         |
| 377       | T             | 1000          | 11           | 989           | 0:40.00                         |
| 378       | T             | 1000          | 11           | 989           | 0:52.17                         |
| 379       | T             | 1000          | 11           | 989           | 0:41.60                         |
| 380       | T             | 1000          | 11           | 989           | 1:02.65                         |
| 381       | T             | 1000          | 11           | 989           | 0:41.49                         |
| 382       | T             | 1000          | 11           | 989           | 0:54.41                         |

| <b>Id</b> | <b>Result</b> | <b>#total</b> | <b>#true</b> | <b>#false</b> | <b>Execution time (min:sec)</b> |
|-----------|---------------|---------------|--------------|---------------|---------------------------------|
| 383       | T             | 293           | 0            | 293           | 0:12.19                         |
| 384       | T             | 1000          | 11           | 989           | 0:40.33                         |
| 385       | T             | 1000          | 11           | 989           | 0:42.70                         |
| 386       | T             | 1000          | 11           | 989           | 0:43.34                         |
| 387       | T             | 1000          | 11           | 989           | 0:41.06                         |
| 388       | T             | 293           | 0            | 293           | 0:12.20                         |
| 389       | T             | 293           | 0            | 293           | 0:12.12                         |
| 390       | T             | 1000          | 11           | 989           | 0:47.69                         |
| 391       | T             | 1000          | 11           | 989           | 0:28.40                         |
| 392       | T             | 1000          | 11           | 989           | 0:45.53                         |
| 393       | T             | 293           | 0            | 293           | 0:16.86                         |
| 394       | T             | 1000          | 11           | 989           | 0:40.63                         |
| 395       | T             | 1000          | 11           | 989           | 0:39.33                         |
| 396       | T             | 1000          | 11           | 989           | 0:41.50                         |
| 397       | T             | 1000          | 11           | 989           | 0:50.53                         |
| 398       | T             | 1000          | 11           | 989           | 0:44.74                         |
| 399       | T             | 1000          | 11           | 989           | 1:02.75                         |
| 400       | T             | 1000          | 11           | 989           | 0:30.77                         |
| 401       | T             | 1000          | 11           | 989           | 1:02.69                         |
| 402       | T             | 1000          | 11           | 989           | 0:43.07                         |
| 403       | T             | 1000          | 11           | 989           | 1:00.13                         |
| 404       | T             | 1000          | 11           | 989           | 0:42.08                         |
| 405       | T             | 1000          | 11           | 989           | 0:32.26                         |
| 406       | T             | 1000          | 11           | 989           | 0:42.07                         |
| 407       | T             | 1000          | 11           | 989           | 0:56.48                         |
| 408       | T             | 1000          | 11           | 989           | 0:25.37                         |
| 409       | T             | 1000          | 11           | 989           | 0:26.30                         |
| 410       | T             | 1000          | 11           | 989           | 0:41.38                         |
| 411       | T             | 1000          | 11           | 989           | 0:38.55                         |
| 412       | T             | 1000          | 11           | 989           | 0:39.50                         |
| 413       | T             | 1000          | 11           | 989           | 0:48.73                         |
| 414       | T             | 293           | 0            | 293           | 0:12.27                         |
| 415       | T             | 1000          | 11           | 989           | 0:38.98                         |
| 416       | T             | 1000          | 11           | 989           | 0:52.67                         |
| 417       | T             | 1000          | 11           | 989           | 0:41.84                         |
| 418       | T             | 1000          | 11           | 989           | 0:52.65                         |
| 419       | T             | 1000          | 11           | 989           | 0:55.97                         |
| 420       | T             | 1000          | 11           | 989           | 0:39.81                         |
| 421       | T             | 1000          | 11           | 989           | 0:41.65                         |
| 422       | T             | 1000          | 11           | 989           | 0:26.70                         |
| 423       | T             | 1000          | 11           | 989           | 0:35.04                         |
| 424       | T             | 1000          | 11           | 989           | 0:32.43                         |
| 425       | T             | 1000          | 11           | 989           | 0:57.57                         |
| 426       | T             | 1000          | 11           | 989           | 0:42.72                         |
| 427       | T             | 1000          | 11           | 989           | 0:41.67                         |
| 428       | T             | 1000          | 11           | 989           | 0:35.08                         |
| 429       | T             | 1000          | 11           | 989           | 0:41.03                         |
| 430       | T             | 1000          | 11           | 989           | 1:05.23                         |



| <b>Id</b> | <b>Result</b> | <b>#total</b> | <b>#true</b> | <b>#false</b> | <b>Execution time (min:sec)</b> |
|-----------|---------------|---------------|--------------|---------------|---------------------------------|
| 431       | T             | 1000          | 11           | 989           | 0:40.43                         |
| 432       | T             | 1000          | 11           | 989           | 0:35.05                         |
| 433       | T             | 1000          | 11           | 989           | 0:52.66                         |
| 434       | T             | 1000          | 11           | 989           | 0:41.59                         |
| 435       | T             | 1000          | 11           | 989           | 0:39.80                         |
| 436       | T             | 1000          | 11           | 989           | 0:40.46                         |
| 437       | T             | 1000          | 11           | 989           | 0:43.86                         |
| 438       | T             | 1000          | 11           | 989           | 0:41.94                         |
| 439       | T             | 1000          | 11           | 989           | 0:36.38                         |
| 440       | T             | 1000          | 11           | 989           | 0:47.33                         |
| 441       | T             | 1000          | 11           | 989           | 1:00.66                         |
| 442       | T             | 1000          | 11           | 989           | 0:55.14                         |
| 443       | T             | 1000          | 11           | 989           | 0:47.40                         |
| 444       | T             | 1000          | 11           | 989           | 0:40.18                         |
| 445       | T             | 1000          | 11           | 989           | 0:59.09                         |
| 446       | T             | 1000          | 11           | 989           | 0:44.33                         |
| 447       | T             | 1000          | 11           | 989           | 0:53.70                         |
| 448       | T             | 1000          | 11           | 989           | 0:38.51                         |
| 449       | T             | 1000          | 11           | 989           | 0:45.91                         |
| 450       | T             | 1000          | 11           | 989           | 0:41.25                         |
| 451       | T             | 1000          | 11           | 989           | 0:43.60                         |
| 452       | T             | 1000          | 11           | 989           | 0:41.35                         |
| 453       | T             | 1000          | 11           | 989           | 0:33.71                         |
| 454       | T             | 1000          | 11           | 989           | 0:48.40                         |
| 455       | T             | 1000          | 11           | 989           | 0:30.75                         |
| 456       | T             | 1000          | 11           | 989           | 0:43.62                         |
| 457       | T             | 1000          | 11           | 989           | 0:34.40                         |
| 458       | T             | 1000          | 11           | 989           | 0:45.30                         |
| 459       | T             | 1000          | 11           | 989           | 0:36.64                         |
| 460       | T             | 1000          | 11           | 989           | 0:56.36                         |
| 461       | T             | 1000          | 11           | 989           | 0:43.02                         |
| 462       | T             | 1000          | 11           | 989           | 0:53.85                         |
| 463       | T             | 1000          | 11           | 989           | 1:07.84                         |
| 464       | T             | 1000          | 11           | 989           | 0:27.33                         |
| 465       | T             | 1000          | 11           | 989           | 0:48.61                         |
| 466       | T             | 1000          | 11           | 989           | 0:55.21                         |
| 467       | T             | 1000          | 11           | 989           | 0:41.43                         |
| 468       | T             | 1000          | 11           | 989           | 0:41.21                         |
| 469       | T             | 1000          | 11           | 989           | 0:41.90                         |
| 470       | T             | 1000          | 11           | 989           | 0:43.10                         |
| 471       | T             | 1000          | 11           | 989           | 0:45.71                         |
| 472       | T             | 1000          | 11           | 989           | 0:41.51                         |
| 473       | T             | 1000          | 11           | 989           | 0:54.99                         |
| 474       | T             | 1000          | 11           | 989           | 0:48.78                         |
| 475       | T             | 1000          | 11           | 989           | 0:31.48                         |
| 476       | T             | 1000          | 11           | 989           | 0:34.22                         |
| 477       | T             | 1000          | 11           | 989           | 0:53.41                         |
| 478       | T             | 1000          | 11           | 989           | 0:46.39                         |

| <b>Id</b> | <b>Result</b> | <b>#total</b> | <b>#true</b> | <b>#false</b> | <b>Execution time (min:sec)</b> |
|-----------|---------------|---------------|--------------|---------------|---------------------------------|
| 479       | T             | 1000          | 11           | 989           | 0:47.68                         |
| 480       | T             | 1000          | 11           | 989           | 0:40.59                         |
| 481       | T             | 1000          | 11           | 989           | 0:55.16                         |
| 482       | T             | 1000          | 11           | 989           | 0:50.41                         |
| 483       | T             | 293           | 0            | 293           | 0:12.46                         |
| 484       | T             | 1000          | 11           | 989           | 0:42.09                         |
| 485       | T             | 1000          | 11           | 989           | 0:51.41                         |
| 486       | T             | 1000          | 11           | 989           | 0:39.71                         |
| 487       | T             | 1000          | 11           | 989           | 0:41.38                         |
| 488       | T             | 1000          | 11           | 989           | 0:36.88                         |
| 489       | T             | 1000          | 11           | 989           | 0:54.65                         |
| 490       | T             | 1000          | 11           | 989           | 0:44.37                         |
| 491       | T             | 1000          | 11           | 989           | 0:41.62                         |
| 492       | T             | 1000          | 11           | 989           | 0:42.35                         |
| 493       | T             | 1000          | 11           | 989           | 0:53.16                         |
| 494       | T             | 1000          | 11           | 989           | 0:22.51                         |
| 495       | T             | 1000          | 11           | 989           | 0:42.10                         |
| 496       | T             | 1000          | 11           | 989           | 0:36.58                         |
| 497       | T             | 1000          | 11           | 989           | 0:40.76                         |
| 498       | T             | 1000          | 11           | 989           | 0:37.50                         |
| 499       | T             | 1000          | 11           | 989           | 0:41.52                         |
| 500       | T             | 1000          | 11           | 989           | 0:49.92                         |

Table 7: Model checking results corresponding to logic property 7

| <b>Id</b> | <b>Result</b> | <b>#total</b> | <b>#true</b> | <b>#false</b> | <b>Execution time (min:sec)</b> |
|-----------|---------------|---------------|--------------|---------------|---------------------------------|
| 1         | T             | 69            | 68           | 1             | 0:02.92                         |
| 2         | T             | 58            | 58           | 0             | 0:02.48                         |
| 3         | T             | 58            | 58           | 0             | 0:02.49                         |
| 4         | T             | 58            | 58           | 0             | 0:02.51                         |
| 5         | T             | 193           | 183          | 10            | 0:13.06                         |
| 6         | T             | 69            | 68           | 1             | 0:02.95                         |
| 7         | T             | 152           | 145          | 7             | 0:06.42                         |
| 8         | T             | 207           | 196          | 11            | 0:08.75                         |
| 9         | T             | 83            | 81           | 2             | 0:03.54                         |
| 10        | T             | 83            | 81           | 2             | 0:03.51                         |
| 11        | T             | 166           | 158          | 8             | 0:07.00                         |
| 12        | T             | 138           | 132          | 6             | 0:05.81                         |
| 13        | T             | 83            | 81           | 2             | 0:03.51                         |
| 14        | T             | 96            | 93           | 3             | 0:04.17                         |
| 15        | T             | 193           | 183          | 10            | 0:08.16                         |
| 16        | T             | 83            | 81           | 2             | 0:03.53                         |
| 17        | T             | 262           | 247          | 15            | 0:11.08                         |
| 18        | T             | 96            | 93           | 3             | 0:04.05                         |
| 19        | T             | 110           | 106          | 4             | 0:04.70                         |

| <b>Id</b> | <b>Result</b> | <b>#total</b> | <b>#true</b> | <b>#false</b> | <b>Execution time (min:sec)</b> |
|-----------|---------------|---------------|--------------|---------------|---------------------------------|
| 20        | T             | 96            | 93           | 3             | 0:04.04                         |
| 21        | T             | 58            | 58           | 0             | 0:02.49                         |
| 22        | T             | 96            | 93           | 3             | 0:04.09                         |
| 23        | T             | 83            | 81           | 2             | 0:03.52                         |
| 24        | T             | 83            | 81           | 2             | 0:03.53                         |
| 25        | T             | 110           | 106          | 4             | 0:04.64                         |
| 26        | T             | 58            | 58           | 0             | 0:02.46                         |
| 27        | T             | 235           | 222          | 13            | 0:10.00                         |
| 28        | T             | 96            | 93           | 3             | 0:04.07                         |
| 29        | T             | 221           | 209          | 12            | 0:09.27                         |
| 30        | T             | 138           | 132          | 6             | 0:05.81                         |
| 31        | T             | 96            | 93           | 3             | 0:04.13                         |
| 32        | T             | 166           | 158          | 8             | 0:10.57                         |
| 33        | T             | 110           | 106          | 4             | 0:04.64                         |
| 34        | T             | 69            | 68           | 1             | 0:04.52                         |
| 35        | T             | 138           | 132          | 6             | 0:05.85                         |
| 36        | T             | 193           | 183          | 10            | 0:06.53                         |
| 37        | T             | 96            | 93           | 3             | 0:04.09                         |
| 38        | T             | 69            | 68           | 1             | 0:02.97                         |
| 39        | T             | 83            | 81           | 2             | 0:03.53                         |
| 40        | T             | 96            | 93           | 3             | 0:04.07                         |
| 41        | T             | 58            | 58           | 0             | 0:02.49                         |
| 42        | T             | 83            | 81           | 2             | 0:03.50                         |
| 43        | T             | 83            | 81           | 2             | 0:03.56                         |
| 44        | T             | 179           | 170          | 9             | 0:07.52                         |
| 45        | T             | 124           | 119          | 5             | 0:07.17                         |
| 46        | T             | 110           | 106          | 4             | 0:04.68                         |
| 47        | T             | 138           | 132          | 6             | 0:05.82                         |
| 48        | T             | 124           | 119          | 5             | 0:05.25                         |
| 49        | T             | 138           | 132          | 6             | 0:05.83                         |
| 50        | T             | 110           | 106          | 4             | 0:04.65                         |
| 51        | T             | 69            | 68           | 1             | 0:02.95                         |
| 52        | T             | 83            | 81           | 2             | 0:03.51                         |
| 53        | T             | 83            | 81           | 2             | 0:04.17                         |
| 54        | T             | 124           | 119          | 5             | 0:05.22                         |
| 55        | T             | 69            | 68           | 1             | 0:02.92                         |
| 56        | T             | 58            | 58           | 0             | 0:02.47                         |
| 57        | T             | 96            | 93           | 3             | 0:04.05                         |
| 58        | T             | 110           | 106          | 4             | 0:04.70                         |
| 59        | T             | 83            | 81           | 2             | 0:03.54                         |
| 60        | T             | 124           | 119          | 5             | 0:05.19                         |
| 61        | T             | 69            | 68           | 1             | 0:02.94                         |
| 62        | T             | 83            | 81           | 2             | 0:03.56                         |
| 63        | T             | 58            | 58           | 0             | 0:02.46                         |
| 64        | T             | 166           | 158          | 8             | 0:07.22                         |
| 65        | T             | 166           | 158          | 8             | 0:06.95                         |
| 66        | T             | 58            | 58           | 0             | 0:02.48                         |
| 67        | T             | 96            | 93           | 3             | 0:04.11                         |

| <b>Id</b> | <b>Result</b> | <b>#total</b> | <b>#true</b> | <b>#false</b> | <b>Execution time (min:sec)</b> |
|-----------|---------------|---------------|--------------|---------------|---------------------------------|
| 68        | T             | 152           | 145          | 7             | 0:06.50                         |
| 69        | T             | 69            | 68           | 1             | 0:02.92                         |
| 70        | T             | 83            | 81           | 2             | 0:03.52                         |
| 71        | T             | 96            | 93           | 3             | 0:04.08                         |
| 72        | T             | 83            | 81           | 2             | 0:03.51                         |
| 73        | T             | 58            | 58           | 0             | 0:02.46                         |
| 74        | T             | 166           | 158          | 8             | 0:06.99                         |
| 75        | T             | 193           | 183          | 10            | 0:08.12                         |
| 76        | T             | 152           | 145          | 7             | 0:06.42                         |
| 77        | T             | 69            | 68           | 1             | 0:02.95                         |
| 78        | T             | 69            | 68           | 1             | 0:02.97                         |
| 79        | T             | 69            | 68           | 1             | 0:02.96                         |
| 80        | T             | 58            | 58           | 0             | 0:02.51                         |
| 81        | T             | 138           | 132          | 6             | 0:05.83                         |
| 82        | T             | 83            | 81           | 2             | 0:03.56                         |
| 83        | T             | 96            | 93           | 3             | 0:04.08                         |
| 84        | T             | 124           | 119          | 5             | 0:08.54                         |
| 85        | T             | 138           | 132          | 6             | 0:05.84                         |
| 86        | T             | 69            | 68           | 1             | 0:02.94                         |
| 87        | T             | 83            | 81           | 2             | 0:03.52                         |
| 88        | T             | 193           | 183          | 10            | 0:13.45                         |
| 89        | T             | 138           | 132          | 6             | 0:05.94                         |
| 90        | T             | 69            | 68           | 1             | 0:02.93                         |
| 91        | T             | 138           | 132          | 6             | 0:05.81                         |
| 92        | T             | 96            | 93           | 3             | 0:04.09                         |
| 93        | T             | 166           | 158          | 8             | 0:07.01                         |
| 94        | T             | 83            | 81           | 2             | 0:03.58                         |
| 95        | T             | 138           | 132          | 6             | 0:05.81                         |
| 96        | T             | 110           | 106          | 4             | 0:04.69                         |
| 97        | T             | 124           | 119          | 5             | 0:05.25                         |
| 98        | T             | 110           | 106          | 4             | 0:05.43                         |
| 99        | T             | 152           | 145          | 7             | 0:06.43                         |
| 100       | T             | 96            | 93           | 3             | 0:04.11                         |
| 101       | T             | 83            | 81           | 2             | 0:03.50                         |
| 102       | T             | 124           | 119          | 5             | 0:05.19                         |
| 103       | T             | 138           | 132          | 6             | 0:05.85                         |
| 104       | T             | 179           | 170          | 9             | 0:07.53                         |
| 105       | T             | 124           | 119          | 5             | 0:05.25                         |
| 106       | T             | 110           | 106          | 4             | 0:04.66                         |
| 107       | T             | 152           | 145          | 7             | 0:06.41                         |
| 108       | T             | 58            | 58           | 0             | 0:02.49                         |
| 109       | T             | 96            | 93           | 3             | 0:04.07                         |
| 110       | T             | 124           | 119          | 5             | 0:05.25                         |
| 111       | T             | 124           | 119          | 5             | 0:05.25                         |
| 112       | T             | 69            | 68           | 1             | 0:02.90                         |
| 113       | T             | 110           | 106          | 4             | 0:04.66                         |
| 114       | T             | 110           | 106          | 4             | 0:04.64                         |
| 115       | T             | 179           | 170          | 9             | 0:07.56                         |

| <b>Id</b> | <b>Result</b> | <b>#total</b> | <b>#true</b> | <b>#false</b> | <b>Execution time (min:sec)</b> |
|-----------|---------------|---------------|--------------|---------------|---------------------------------|
| 116       | T             | 124           | 119          | 5             | 0:05.25                         |
| 117       | T             | 69            | 68           | 1             | 0:02.91                         |
| 118       | T             | 138           | 132          | 6             | 0:08.26                         |
| 119       | T             | 166           | 158          | 8             | 0:07.97                         |
| 120       | T             | 96            | 93           | 3             | 0:04.08                         |
| 121       | T             | 83            | 81           | 2             | 0:04.21                         |
| 122       | T             | 110           | 106          | 4             | 0:04.66                         |
| 123       | T             | 96            | 93           | 3             | 0:05.52                         |
| 124       | T             | 124           | 119          | 5             | 0:05.25                         |
| 125       | T             | 179           | 170          | 9             | 0:07.53                         |
| 126       | T             | 83            | 81           | 2             | 0:03.54                         |
| 127       | T             | 152           | 145          | 7             | 0:06.40                         |
| 128       | T             | 96            | 93           | 3             | 0:04.06                         |
| 129       | T             | 83            | 81           | 2             | 0:03.50                         |
| 130       | T             | 96            | 93           | 3             | 0:04.06                         |
| 131       | T             | 152           | 145          | 7             | 0:06.38                         |
| 132       | T             | 83            | 81           | 2             | 0:03.88                         |
| 133       | T             | 124           | 119          | 5             | 0:05.22                         |
| 134       | T             | 83            | 81           | 2             | 0:03.54                         |
| 135       | T             | 96            | 93           | 3             | 0:04.04                         |
| 136       | T             | 83            | 81           | 2             | 0:03.56                         |
| 137       | T             | 69            | 68           | 1             | 0:02.95                         |
| 138       | T             | 110           | 106          | 4             | 0:04.71                         |
| 139       | T             | 69            | 68           | 1             | 0:02.95                         |
| 140       | T             | 96            | 93           | 3             | 0:04.10                         |
| 141       | T             | 83            | 81           | 2             | 0:03.50                         |
| 142       | T             | 248           | 234          | 14            | 0:12.71                         |
| 143       | T             | 110           | 106          | 4             | 0:04.67                         |
| 144       | T             | 69            | 68           | 1             | 0:02.91                         |
| 145       | T             | 96            | 93           | 3             | 0:04.09                         |
| 146       | T             | 69            | 68           | 1             | 0:02.91                         |
| 147       | T             | 58            | 58           | 0             | 0:02.45                         |
| 148       | T             | 83            | 81           | 2             | 0:03.57                         |
| 149       | T             | 69            | 68           | 1             | 0:02.94                         |
| 150       | T             | 69            | 68           | 1             | 0:02.98                         |
| 151       | T             | 83            | 81           | 2             | 0:03.52                         |
| 152       | T             | 69            | 68           | 1             | 0:02.94                         |
| 153       | T             | 138           | 132          | 6             | 0:09.09                         |
| 154       | T             | 83            | 81           | 2             | 0:03.53                         |
| 155       | T             | 96            | 93           | 3             | 0:04.08                         |
| 156       | T             | 110           | 106          | 4             | 0:04.66                         |
| 157       | T             | 110           | 106          | 4             | 0:04.67                         |
| 158       | T             | 58            | 58           | 0             | 0:02.48                         |
| 159       | T             | 138           | 132          | 6             | 0:05.84                         |
| 160       | T             | 262           | 247          | 15            | 0:09.40                         |
| 161       | T             | 124           | 119          | 5             | 0:05.27                         |
| 162       | T             | 83            | 81           | 2             | 0:03.53                         |
| 163       | T             | 166           | 158          | 8             | 0:07.01                         |

| <b>Id</b> | <b>Result</b> | <b>#total</b> | <b>#true</b> | <b>#false</b> | <b>Execution time (min:sec)</b> |
|-----------|---------------|---------------|--------------|---------------|---------------------------------|
| 164       | T             | 69            | 68           | 1             | 0:02.94                         |
| 165       | T             | 110           | 106          | 4             | 0:04.66                         |
| 166       | T             | 58            | 58           | 0             | 0:03.76                         |
| 167       | T             | 207           | 196          | 11            | 0:08.70                         |
| 168       | T             | 83            | 81           | 2             | 0:03.53                         |
| 169       | T             | 96            | 93           | 3             | 0:04.07                         |
| 170       | T             | 179           | 170          | 9             | 0:07.52                         |
| 171       | T             | 124           | 119          | 5             | 0:05.20                         |
| 172       | T             | 152           | 145          | 7             | 0:06.40                         |
| 173       | T             | 138           | 132          | 6             | 0:05.84                         |
| 174       | T             | 166           | 158          | 8             | 0:07.01                         |
| 175       | T             | 58            | 58           | 0             | 0:02.48                         |
| 176       | T             | 83            | 81           | 2             | 0:03.54                         |
| 177       | T             | 124           | 119          | 5             | 0:05.36                         |
| 178       | T             | 110           | 106          | 4             | 0:04.75                         |
| 179       | T             | 124           | 119          | 5             | 0:05.25                         |
| 180       | T             | 96            | 93           | 3             | 0:04.07                         |
| 181       | T             | 69            | 68           | 1             | 0:02.92                         |
| 182       | T             | 83            | 81           | 2             | 0:03.53                         |
| 183       | T             | 58            | 58           | 0             | 0:02.45                         |
| 184       | T             | 124           | 119          | 5             | 0:05.25                         |
| 185       | T             | 69            | 68           | 1             | 0:02.95                         |
| 186       | T             | 96            | 93           | 3             | 0:04.09                         |
| 187       | T             | 110           | 106          | 4             | 0:04.67                         |
| 188       | T             | 83            | 81           | 2             | 0:03.57                         |
| 189       | T             | 110           | 106          | 4             | 0:04.67                         |
| 190       | T             | 138           | 132          | 6             | 0:05.81                         |
| 191       | T             | 110           | 106          | 4             | 0:04.69                         |
| 192       | T             | 193           | 183          | 10            | 0:08.09                         |
| 193       | T             | 69            | 68           | 1             | 0:02.93                         |
| 194       | T             | 221           | 209          | 12            | 0:13.42                         |
| 195       | T             | 58            | 58           | 0             | 0:02.46                         |
| 196       | T             | 69            | 68           | 1             | 0:02.94                         |
| 197       | T             | 58            | 58           | 0             | 0:02.47                         |
| 198       | T             | 83            | 81           | 2             | 0:03.56                         |
| 199       | T             | 179           | 170          | 9             | 0:07.59                         |
| 200       | T             | 152           | 145          | 7             | 0:06.39                         |
| 201       | T             | 110           | 106          | 4             | 0:04.71                         |
| 202       | T             | 110           | 106          | 4             | 0:04.64                         |
| 203       | T             | 235           | 222          | 13            | 0:09.87                         |
| 204       | T             | 69            | 68           | 1             | 0:02.96                         |
| 205       | T             | 235           | 222          | 13            | 0:08.47                         |
| 206       | T             | 96            | 93           | 3             | 0:04.09                         |
| 207       | T             | 110           | 106          | 4             | 0:04.66                         |
| 208       | T             | 110           | 106          | 4             | 0:04.67                         |
| 209       | T             | 124           | 119          | 5             | 0:05.27                         |
| 210       | T             | 110           | 106          | 4             | 0:04.71                         |
| 211       | T             | 96            | 93           | 3             | 0:04.06                         |

| <b>Id</b> | <b>Result</b> | <b>#total</b> | <b>#true</b> | <b>#false</b> | <b>Execution time (min:sec)</b> |
|-----------|---------------|---------------|--------------|---------------|---------------------------------|
| 212       | T             | 58            | 58           | 0             | 0:02.45                         |
| 213       | T             | 96            | 93           | 3             | 0:04.08                         |
| 214       | T             | 207           | 196          | 11            | 0:08.77                         |
| 215       | T             | 83            | 81           | 2             | 0:03.53                         |
| 216       | T             | 69            | 68           | 1             | 0:04.30                         |
| 217       | T             | 83            | 81           | 2             | 0:03.51                         |
| 218       | T             | 96            | 93           | 3             | 0:04.06                         |
| 219       | T             | 69            | 68           | 1             | 0:02.94                         |
| 220       | T             | 138           | 132          | 6             | 0:05.81                         |
| 221       | T             | 124           | 119          | 5             | 0:05.30                         |
| 222       | T             | 276           | 260          | 16            | 0:13.14                         |
| 223       | T             | 124           | 119          | 5             | 0:05.24                         |
| 224       | T             | 69            | 68           | 1             | 0:02.93                         |
| 225       | T             | 83            | 81           | 2             | 0:03.50                         |
| 226       | T             | 58            | 58           | 0             | 0:02.49                         |
| 227       | T             | 138           | 132          | 6             | 0:08.27                         |
| 228       | T             | 96            | 93           | 3             | 0:04.04                         |
| 229       | T             | 83            | 81           | 2             | 0:03.54                         |
| 230       | T             | 69            | 68           | 1             | 0:02.92                         |
| 231       | T             | 69            | 68           | 1             | 0:02.94                         |
| 232       | T             | 110           | 106          | 4             | 0:04.65                         |
| 233       | T             | 110           | 106          | 4             | 0:04.66                         |
| 234       | T             | 58            | 58           | 0             | 0:02.48                         |
| 235       | T             | 124           | 119          | 5             | 0:05.22                         |
| 236       | T             | 96            | 93           | 3             | 0:04.06                         |
| 237       | T             | 138           | 132          | 6             | 0:05.86                         |
| 238       | T             | 96            | 93           | 3             | 0:04.06                         |
| 239       | T             | 96            | 93           | 3             | 0:04.05                         |
| 240       | T             | 96            | 93           | 3             | 0:04.07                         |
| 241       | T             | 69            | 68           | 1             | 0:02.96                         |
| 242       | T             | 69            | 68           | 1             | 0:02.95                         |
| 243       | T             | 124           | 119          | 5             | 0:05.24                         |
| 244       | T             | 69            | 68           | 1             | 0:02.92                         |
| 245       | T             | 58            | 58           | 0             | 0:02.48                         |
| 246       | T             | 166           | 158          | 8             | 0:07.02                         |
| 247       | T             | 152           | 145          | 7             | 0:06.47                         |
| 248       | T             | 124           | 119          | 5             | 0:05.20                         |
| 249       | T             | 58            | 58           | 0             | 0:02.47                         |
| 250       | T             | 69            | 68           | 1             | 0:02.99                         |
| 251       | T             | 110           | 106          | 4             | 0:05.85                         |
| 252       | T             | 166           | 158          | 8             | 0:07.71                         |
| 253       | T             | 83            | 81           | 2             | 0:03.55                         |
| 254       | T             | 124           | 119          | 5             | 0:06.12                         |
| 255       | T             | 69            | 68           | 1             | 0:02.95                         |
| 256       | T             | 58            | 58           | 0             | 0:02.48                         |
| 257       | T             | 69            | 68           | 1             | 0:02.96                         |
| 258       | T             | 58            | 58           | 0             | 0:02.50                         |
| 259       | T             | 83            | 81           | 2             | 0:03.56                         |

| <b>Id</b> | <b>Result</b> | <b>#total</b> | <b>#true</b> | <b>#false</b> | <b>Execution time (min:sec)</b> |
|-----------|---------------|---------------|--------------|---------------|---------------------------------|
| 260       | T             | 124           | 119          | 5             | 0:05.21                         |
| 261       | T             | 83            | 81           | 2             | 0:03.59                         |
| 262       | T             | 96            | 93           | 3             | 0:04.03                         |
| 263       | T             | 193           | 183          | 10            | 0:08.12                         |
| 264       | T             | 58            | 58           | 0             | 0:02.46                         |
| 265       | T             | 179           | 170          | 9             | 0:11.15                         |
| 266       | T             | 96            | 93           | 3             | 0:04.09                         |
| 267       | T             | 207           | 196          | 11            | 0:08.78                         |
| 268       | T             | 83            | 81           | 2             | 0:03.52                         |
| 269       | T             | 58            | 58           | 0             | 0:02.49                         |
| 270       | T             | 179           | 170          | 9             | 0:07.58                         |
| 271       | T             | 69            | 68           | 1             | 0:02.95                         |
| 272       | T             | 179           | 170          | 9             | 0:07.54                         |
| 273       | T             | 58            | 58           | 0             | 0:02.48                         |
| 274       | T             | 96            | 93           | 3             | 0:04.12                         |
| 275       | T             | 58            | 58           | 0             | 0:02.46                         |
| 276       | T             | 138           | 132          | 6             | 0:05.87                         |
| 277       | T             | 58            | 58           | 0             | 0:02.48                         |
| 278       | T             | 110           | 106          | 4             | 0:05.91                         |
| 279       | T             | 96            | 93           | 3             | 0:04.07                         |
| 280       | T             | 83            | 81           | 2             | 0:03.51                         |
| 281       | T             | 110           | 106          | 4             | 0:04.72                         |
| 282       | T             | 110           | 106          | 4             | 0:04.65                         |
| 283       | T             | 83            | 81           | 2             | 0:03.50                         |
| 284       | T             | 179           | 170          | 9             | 0:07.48                         |
| 285       | T             | 110           | 106          | 4             | 0:04.65                         |
| 286       | T             | 110           | 106          | 4             | 0:04.68                         |
| 287       | T             | 58            | 58           | 0             | 0:02.50                         |
| 288       | T             | 69            | 68           | 1             | 0:02.95                         |
| 289       | T             | 69            | 68           | 1             | 0:02.92                         |
| 290       | T             | 58            | 58           | 0             | 0:02.46                         |
| 291       | T             | 58            | 58           | 0             | 0:02.46                         |
| 292       | T             | 124           | 119          | 5             | 0:05.26                         |
| 293       | T             | 69            | 68           | 1             | 0:02.91                         |
| 294       | T             | 83            | 81           | 2             | 0:05.62                         |
| 295       | T             | 83            | 81           | 2             | 0:03.51                         |
| 296       | T             | 83            | 81           | 2             | 0:03.55                         |
| 297       | T             | 69            | 68           | 1             | 0:02.94                         |
| 298       | T             | 69            | 68           | 1             | 0:02.89                         |
| 299       | T             | 96            | 93           | 3             | 0:04.06                         |
| 300       | T             | 124           | 119          | 5             | 0:05.25                         |
| 301       | T             | 69            | 68           | 1             | 0:02.94                         |
| 302       | T             | 124           | 119          | 5             | 0:05.20                         |
| 303       | T             | 69            | 68           | 1             | 0:02.94                         |
| 304       | T             | 96            | 93           | 3             | 0:04.08                         |
| 305       | T             | 69            | 68           | 1             | 0:02.92                         |
| 306       | T             | 193           | 183          | 10            | 0:08.19                         |
| 307       | T             | 83            | 81           | 2             | 0:03.49                         |



| <b>Id</b> | <b>Result</b> | <b>#total</b> | <b>#true</b> | <b>#false</b> | <b>Execution time (min:sec)</b> |
|-----------|---------------|---------------|--------------|---------------|---------------------------------|
| 308       | T             | 83            | 81           | 2             | 0:03.58                         |
| 309       | T             | 193           | 183          | 10            | 0:08.15                         |
| 310       | T             | 96            | 93           | 3             | 0:04.04                         |
| 311       | T             | 83            | 81           | 2             | 0:03.53                         |
| 312       | T             | 58            | 58           | 0             | 0:02.47                         |
| 313       | T             | 69            | 68           | 1             | 0:02.90                         |
| 314       | T             | 193           | 183          | 10            | 0:12.96                         |
| 315       | T             | 83            | 81           | 2             | 0:03.58                         |
| 316       | T             | 124           | 119          | 5             | 0:05.23                         |
| 317       | T             | 83            | 81           | 2             | 0:03.55                         |
| 318       | T             | 83            | 81           | 2             | 0:03.52                         |
| 319       | T             | 110           | 106          | 4             | 0:04.66                         |
| 320       | T             | 124           | 119          | 5             | 0:05.25                         |
| 321       | T             | 96            | 93           | 3             | 0:04.08                         |
| 322       | T             | 110           | 106          | 4             | 0:04.70                         |
| 323       | T             | 207           | 196          | 11            | 0:10.79                         |
| 324       | T             | 124           | 119          | 5             | 0:05.25                         |
| 325       | T             | 83            | 81           | 2             | 0:03.54                         |
| 326       | T             | 110           | 106          | 4             | 0:06.50                         |
| 327       | T             | 69            | 68           | 1             | 0:02.97                         |
| 328       | T             | 58            | 58           | 0             | 0:02.45                         |
| 329       | T             | 138           | 132          | 6             | 0:05.86                         |
| 330       | T             | 69            | 68           | 1             | 0:02.91                         |
| 331       | T             | 69            | 68           | 1             | 0:02.92                         |
| 332       | T             | 96            | 93           | 3             | 0:04.08                         |
| 333       | T             | 83            | 81           | 2             | 0:03.50                         |
| 334       | T             | 83            | 81           | 2             | 0:03.57                         |
| 335       | T             | 166           | 158          | 8             | 0:07.48                         |
| 336       | T             | 110           | 106          | 4             | 0:04.63                         |
| 337       | T             | 221           | 209          | 12            | 0:09.34                         |
| 338       | T             | 69            | 68           | 1             | 0:04.78                         |
| 339       | T             | 110           | 106          | 4             | 0:04.68                         |
| 340       | T             | 83            | 81           | 2             | 0:03.52                         |
| 341       | T             | 124           | 119          | 5             | 0:05.20                         |
| 342       | T             | 58            | 58           | 0             | 0:02.46                         |
| 343       | T             | 83            | 81           | 2             | 0:03.54                         |
| 344       | T             | 235           | 222          | 13            | 0:09.87                         |
| 345       | T             | 83            | 81           | 2             | 0:03.53                         |
| 346       | T             | 69            | 68           | 1             | 0:02.95                         |
| 347       | T             | 69            | 68           | 1             | 0:02.93                         |
| 348       | T             | 69            | 68           | 1             | 0:02.95                         |
| 349       | T             | 58            | 58           | 0             | 0:02.48                         |
| 350       | T             | 83            | 81           | 2             | 0:03.58                         |
| 351       | T             | 193           | 183          | 10            | 0:08.25                         |
| 352       | T             | 58            | 58           | 0             | 0:02.47                         |
| 353       | T             | 83            | 81           | 2             | 0:03.49                         |
| 354       | T             | 96            | 93           | 3             | 0:04.12                         |
| 355       | T             | 110           | 106          | 4             | 0:06.06                         |

| <b>Id</b> | <b>Result</b> | <b>#total</b> | <b>#true</b> | <b>#false</b> | <b>Execution time (min:sec)</b> |
|-----------|---------------|---------------|--------------|---------------|---------------------------------|
| 356       | T             | 124           | 119          | 5             | 0:05.24                         |
| 357       | T             | 138           | 132          | 6             | 0:05.82                         |
| 358       | T             | 96            | 93           | 3             | 0:04.09                         |
| 359       | T             | 83            | 81           | 2             | 0:03.54                         |
| 360       | T             | 83            | 81           | 2             | 0:03.50                         |
| 361       | T             | 138           | 132          | 6             | 0:05.83                         |
| 362       | T             | 110           | 106          | 4             | 0:04.66                         |
| 363       | T             | 138           | 132          | 6             | 0:05.87                         |
| 364       | T             | 110           | 106          | 4             | 0:04.68                         |
| 365       | T             | 152           | 145          | 7             | 0:06.51                         |
| 366       | T             | 58            | 58           | 0             | 0:04.03                         |
| 367       | T             | 58            | 58           | 0             | 0:02.48                         |
| 368       | T             | 69            | 68           | 1             | 0:02.90                         |
| 369       | T             | 221           | 209          | 12            | 0:09.27                         |
| 370       | T             | 179           | 170          | 9             | 0:07.52                         |
| 371       | T             | 58            | 58           | 0             | 0:02.81                         |
| 372       | T             | 152           | 145          | 7             | 0:06.46                         |
| 373       | T             | 110           | 106          | 4             | 0:04.64                         |
| 374       | T             | 124           | 119          | 5             | 0:04.79                         |
| 375       | T             | 124           | 119          | 5             | 0:05.25                         |
| 376       | T             | 179           | 170          | 9             | 0:07.51                         |
| 377       | T             | 83            | 81           | 2             | 0:03.54                         |
| 378       | T             | 96            | 93           | 3             | 0:04.15                         |
| 379       | T             | 96            | 93           | 3             | 0:04.08                         |
| 380       | T             | 58            | 58           | 0             | 0:02.49                         |
| 381       | T             | 96            | 93           | 3             | 0:04.14                         |
| 382       | T             | 83            | 81           | 2             | 0:03.55                         |
| 383       | T             | 166           | 158          | 8             | 0:07.04                         |
| 384       | T             | 83            | 81           | 2             | 0:05.71                         |
| 385       | T             | 96            | 93           | 3             | 0:05.52                         |
| 386       | T             | 166           | 158          | 8             | 0:07.01                         |
| 387       | T             | 58            | 58           | 0             | 0:02.51                         |
| 388       | T             | 152           | 145          | 7             | 0:06.40                         |
| 389       | T             | 207           | 196          | 11            | 0:08.77                         |
| 390       | T             | 96            | 93           | 3             | 0:04.12                         |
| 391       | T             | 83            | 81           | 2             | 0:03.57                         |
| 392       | T             | 110           | 106          | 4             | 0:04.68                         |
| 393       | T             | 124           | 119          | 5             | 0:07.32                         |
| 394       | T             | 83            | 81           | 2             | 0:03.52                         |
| 395       | T             | 69            | 68           | 1             | 0:02.91                         |
| 396       | T             | 58            | 58           | 0             | 0:02.47                         |
| 397       | T             | 152           | 145          | 7             | 0:06.47                         |
| 398       | T             | 110           | 106          | 4             | 0:04.65                         |
| 399       | T             | 110           | 106          | 4             | 0:04.65                         |
| 400       | T             | 96            | 93           | 3             | 0:06.01                         |
| 401       | T             | 83            | 81           | 2             | 0:04.30                         |
| 402       | T             | 124           | 119          | 5             | 0:05.23                         |
| 403       | T             | 96            | 93           | 3             | 0:04.09                         |

| <b>Id</b> | <b>Result</b> | <b>#total</b> | <b>#true</b> | <b>#false</b> | <b>Execution time (min:sec)</b> |
|-----------|---------------|---------------|--------------|---------------|---------------------------------|
| 404       | T             | 83            | 81           | 2             | 0:03.52                         |
| 405       | T             | 138           | 132          | 6             | 0:05.87                         |
| 406       | T             | 152           | 145          | 7             | 0:06.46                         |
| 407       | T             | 83            | 81           | 2             | 0:03.51                         |
| 408       | T             | 179           | 170          | 9             | 0:07.57                         |
| 409       | T             | 83            | 81           | 2             | 0:03.52                         |
| 410       | T             | 58            | 58           | 0             | 0:04.03                         |
| 411       | T             | 152           | 145          | 7             | 0:06.43                         |
| 412       | T             | 69            | 68           | 1             | 0:02.93                         |
| 413       | T             | 96            | 93           | 3             | 0:06.13                         |
| 414       | T             | 138           | 132          | 6             | 0:07.44                         |
| 415       | T             | 83            | 81           | 2             | 0:03.51                         |
| 416       | T             | 83            | 81           | 2             | 0:03.53                         |
| 417       | T             | 138           | 132          | 6             | 0:05.84                         |
| 418       | T             | 110           | 106          | 4             | 0:04.69                         |
| 419       | T             | 96            | 93           | 3             | 0:04.06                         |
| 420       | T             | 124           | 119          | 5             | 0:05.26                         |
| 421       | T             | 69            | 68           | 1             | 0:02.92                         |
| 422       | T             | 83            | 81           | 2             | 0:03.56                         |
| 423       | T             | 110           | 106          | 4             | 0:04.68                         |
| 424       | T             | 58            | 58           | 0             | 0:02.48                         |
| 425       | T             | 69            | 68           | 1             | 0:02.95                         |
| 426       | T             | 96            | 93           | 3             | 0:04.07                         |
| 427       | T             | 69            | 68           | 1             | 0:04.12                         |
| 428       | T             | 124           | 119          | 5             | 0:05.27                         |
| 429       | T             | 83            | 81           | 2             | 0:03.51                         |
| 430       | T             | 58            | 58           | 0             | 0:02.48                         |
| 431       | T             | 207           | 196          | 11            | 0:09.88                         |
| 432       | T             | 69            | 68           | 1             | 0:02.96                         |
| 433       | T             | 58            | 58           | 0             | 0:02.52                         |
| 434       | T             | 83            | 81           | 2             | 0:03.51                         |
| 435       | T             | 110           | 106          | 4             | 0:04.66                         |
| 436       | T             | 138           | 132          | 6             | 0:05.81                         |
| 437       | T             | 69            | 68           | 1             | 0:02.95                         |
| 438       | T             | 83            | 81           | 2             | 0:03.56                         |
| 439       | T             | 83            | 81           | 2             | 0:03.51                         |
| 440       | T             | 96            | 93           | 3             | 0:04.08                         |
| 441       | T             | 124           | 119          | 5             | 0:05.27                         |
| 442       | T             | 83            | 81           | 2             | 0:03.52                         |
| 443       | T             | 58            | 58           | 0             | 0:02.48                         |
| 444       | T             | 58            | 58           | 0             | 0:02.51                         |
| 445       | T             | 83            | 81           | 2             | 0:03.54                         |
| 446       | T             | 58            | 58           | 0             | 0:02.47                         |
| 447       | T             | 69            | 68           | 1             | 0:02.96                         |
| 448       | T             | 96            | 93           | 3             | 0:04.07                         |
| 449       | T             | 69            | 68           | 1             | 0:02.94                         |
| 450       | T             | 83            | 81           | 2             | 0:03.50                         |
| 451       | T             | 83            | 81           | 2             | 0:03.55                         |

| <b>Id</b> | <b>Result</b> | <b>#total</b> | <b>#true</b> | <b>#false</b> | <b>Execution time (min:sec)</b> |
|-----------|---------------|---------------|--------------|---------------|---------------------------------|
| 452       | T             | 152           | 145          | 7             | 0:06.43                         |
| 453       | T             | 58            | 58           | 0             | 0:02.47                         |
| 454       | T             | 110           | 106          | 4             | 0:04.70                         |
| 455       | T             | 179           | 170          | 9             | 0:09.86                         |
| 456       | T             | 58            | 58           | 0             | 0:02.50                         |
| 457       | T             | 96            | 93           | 3             | 0:04.09                         |
| 458       | T             | 58            | 58           | 0             | 0:02.49                         |
| 459       | T             | 124           | 119          | 5             | 0:06.49                         |
| 460       | T             | 152           | 145          | 7             | 0:06.39                         |
| 461       | T             | 124           | 119          | 5             | 0:05.25                         |
| 462       | T             | 58            | 58           | 0             | 0:02.50                         |
| 463       | T             | 152           | 145          | 7             | 0:09.30                         |
| 464       | T             | 69            | 68           | 1             | 0:02.96                         |
| 465       | T             | 124           | 119          | 5             | 0:05.32                         |
| 466       | T             | 83            | 81           | 2             | 0:03.53                         |
| 467       | T             | 83            | 81           | 2             | 0:03.69                         |
| 468       | T             | 83            | 81           | 2             | 0:03.58                         |
| 469       | T             | 69            | 68           | 1             | 0:02.93                         |
| 470       | T             | 69            | 68           | 1             | 0:02.91                         |
| 471       | T             | 58            | 58           | 0             | 0:02.47                         |
| 472       | T             | 58            | 58           | 0             | 0:02.47                         |
| 473       | T             | 110           | 106          | 4             | 0:04.64                         |
| 474       | T             | 69            | 68           | 1             | 0:02.97                         |
| 475       | T             | 83            | 81           | 2             | 0:03.52                         |
| 476       | T             | 83            | 81           | 2             | 0:03.52                         |
| 477       | T             | 96            | 93           | 3             | 0:04.05                         |
| 478       | T             | 179           | 170          | 9             | 0:07.56                         |
| 479       | T             | 83            | 81           | 2             | 0:03.52                         |
| 480       | T             | 110           | 106          | 4             | 0:04.73                         |
| 481       | T             | 69            | 68           | 1             | 0:02.93                         |
| 482       | T             | 69            | 68           | 1             | 0:03.46                         |
| 483       | T             | 138           | 132          | 6             | 0:05.82                         |
| 484       | T             | 124           | 119          | 5             | 0:05.23                         |
| 485       | T             | 110           | 106          | 4             | 0:04.64                         |
| 486       | T             | 179           | 170          | 9             | 0:07.58                         |
| 487       | T             | 69            | 68           | 1             | 0:02.94                         |
| 488       | T             | 124           | 119          | 5             | 0:06.76                         |
| 489       | T             | 58            | 58           | 0             | 0:02.48                         |
| 490       | T             | 207           | 196          | 11            | 0:05.80                         |
| 491       | T             | 110           | 106          | 4             | 0:04.68                         |
| 492       | T             | 96            | 93           | 3             | 0:04.08                         |
| 493       | T             | 179           | 170          | 9             | 0:07.49                         |
| 494       | T             | 152           | 145          | 7             | 0:06.41                         |
| 495       | T             | 96            | 93           | 3             | 0:04.08                         |
| 496       | T             | 96            | 93           | 3             | 0:05.71                         |
| 497       | T             | 83            | 81           | 2             | 0:03.58                         |
| 498       | T             | 138           | 132          | 6             | 0:05.81                         |
| 499       | T             | 83            | 81           | 2             | 0:04.80                         |

| <b>Id</b> | <b>Result</b> | <b>#total</b> | <b>#true</b> | <b>#false</b> | <b>Execution time (min:sec)</b> |
|-----------|---------------|---------------|--------------|---------------|---------------------------------|
| 500       | T             | 124           | 119          | 5             | 0:05.25                         |

Table 8: Model checking results corresponding to logic property 8

| <b>Id</b> | <b>Result</b> | <b>#total</b> | <b>#true</b> | <b>#false</b> | <b>Execution time (min:sec)</b> |
|-----------|---------------|---------------|--------------|---------------|---------------------------------|
| 1         | T             | 14            | 14           | 0             | 0:00.64                         |
| 2         | T             | 14            | 13           | 1             | 0:00.64                         |
| 3         | T             | 14            | 13           | 1             | 0:00.64                         |
| 4         | T             | 21            | 18           | 3             | 0:00.95                         |
| 5         | T             | 18            | 16           | 2             | 0:00.82                         |
| 6         | T             | 21            | 18           | 3             | 0:00.96                         |
| 7         | T             | 14            | 13           | 1             | 0:00.63                         |
| 8         | T             | 14            | 13           | 1             | 0:00.64                         |
| 9         | T             | 38            | 30           | 8             | 0:01.85                         |
| 10        | T             | 38            | 30           | 8             | 0:01.70                         |
| 11        | T             | 24            | 20           | 4             | 0:01.08                         |
| 12        | T             | 28            | 23           | 5             | 0:01.24                         |
| 13        | T             | 35            | 28           | 7             | 0:01.56                         |
| 14        | T             | 21            | 18           | 3             | 0:00.94                         |
| 15        | T             | 21            | 18           | 3             | 0:00.95                         |
| 16        | T             | 28            | 23           | 5             | 0:01.24                         |
| 17        | T             | 21            | 18           | 3             | 0:00.61                         |
| 18        | T             | 21            | 18           | 3             | 0:00.61                         |
| 19        | T             | 35            | 28           | 7             | 0:01.56                         |
| 20        | T             | 35            | 28           | 7             | 0:01.53                         |
| 21        | T             | 14            | 13           | 1             | 0:00.64                         |
| 22        | T             | 21            | 18           | 3             | 0:00.96                         |
| 23        | T             | 21            | 18           | 3             | 0:00.96                         |
| 24        | T             | 31            | 25           | 6             | 0:01.39                         |
| 25        | T             | 48            | 37           | 11            | 0:02.09                         |
| 26        | T             | 14            | 14           | 0             | 0:00.64                         |
| 27        | T             | 18            | 16           | 2             | 0:00.82                         |
| 28        | T             | 76            | 57           | 19            | 0:03.31                         |
| 29        | T             | 21            | 18           | 3             | 0:00.94                         |
| 30        | T             | 24            | 20           | 4             | 0:01.08                         |
| 31        | T             | 18            | 16           | 2             | 0:00.82                         |
| 32        | T             | 14            | 13           | 1             | 0:00.64                         |
| 33        | T             | 14            | 13           | 1             | 0:00.64                         |
| 34        | T             | 18            | 16           | 2             | 0:00.81                         |
| 35        | T             | 31            | 25           | 6             | 0:01.39                         |
| 36        | T             | 28            | 23           | 5             | 0:01.24                         |
| 37        | T             | 41            | 32           | 9             | 0:01.83                         |
| 38        | T             | 24            | 20           | 4             | 0:01.08                         |
| 39        | T             | 35            | 28           | 7             | 0:01.55                         |
| 40        | T             | 28            | 23           | 5             | 0:01.26                         |

| <b>Id</b> | <b>Result</b> | <b>#total</b> | <b>#true</b> | <b>#false</b> | <b>Execution time (min:sec)</b> |
|-----------|---------------|---------------|--------------|---------------|---------------------------------|
| 41        | T             | 38            | 30           | 8             | 0:01.66                         |
| 42        | T             | 21            | 18           | 3             | 0:01.38                         |
| 43        | T             | 14            | 13           | 1             | 0:00.64                         |
| 44        | T             | 14            | 14           | 0             | 0:00.64                         |
| 45        | T             | 21            | 18           | 3             | 0:00.96                         |
| 46        | T             | 79            | 59           | 20            | 0:03.42                         |
| 47        | T             | 31            | 25           | 6             | 0:01.40                         |
| 48        | T             | 35            | 28           | 7             | 0:01.54                         |
| 49        | T             | 31            | 25           | 6             | 0:01.38                         |
| 50        | T             | 18            | 16           | 2             | 0:00.82                         |
| 51        | T             | 14            | 14           | 0             | 0:00.64                         |
| 52        | T             | 28            | 23           | 5             | 0:01.24                         |
| 53        | T             | 24            | 20           | 4             | 0:01.09                         |
| 54        | T             | 28            | 23           | 5             | 0:01.25                         |
| 55        | T             | 28            | 23           | 5             | 0:01.24                         |
| 56        | T             | 14            | 14           | 0             | 0:00.64                         |
| 57        | T             | 14            | 14           | 0             | 0:00.64                         |
| 58        | T             | 31            | 25           | 6             | 0:01.40                         |
| 59        | T             | 21            | 18           | 3             | 0:00.93                         |
| 60        | T             | 21            | 18           | 3             | 0:00.94                         |
| 61        | T             | 45            | 35           | 10            | 0:01.97                         |
| 62        | T             | 31            | 25           | 6             | 0:01.37                         |
| 63        | T             | 31            | 25           | 6             | 0:01.38                         |
| 64        | T             | 41            | 32           | 9             | 0:01.79                         |
| 65        | T             | 28            | 23           | 5             | 0:01.23                         |
| 66        | T             | 18            | 16           | 2             | 0:00.81                         |
| 67        | T             | 21            | 18           | 3             | 0:00.94                         |
| 68        | T             | 14            | 14           | 0             | 0:00.75                         |
| 69        | T             | 28            | 23           | 5             | 0:01.25                         |
| 70        | T             | 21            | 18           | 3             | 0:00.96                         |
| 71        | T             | 14            | 13           | 1             | 0:00.64                         |
| 72        | T             | 28            | 23           | 5             | 0:01.27                         |
| 73        | T             | 24            | 20           | 4             | 0:01.09                         |
| 74        | T             | 14            | 13           | 1             | 0:00.64                         |
| 75        | T             | 48            | 37           | 11            | 0:02.11                         |
| 76        | T             | 35            | 28           | 7             | 0:02.23                         |
| 77        | T             | 18            | 16           | 2             | 0:00.81                         |
| 78        | T             | 24            | 20           | 4             | 0:01.08                         |
| 79        | T             | 14            | 14           | 0             | 0:00.64                         |
| 80        | T             | 28            | 23           | 5             | 0:01.24                         |
| 81        | T             | 18            | 16           | 2             | 0:00.82                         |
| 82        | T             | 38            | 30           | 8             | 0:01.69                         |
| 83        | T             | 48            | 37           | 11            | 0:02.12                         |
| 84        | T             | 35            | 28           | 7             | 0:01.58                         |
| 85        | T             | 52            | 40           | 12            | 0:02.27                         |
| 86        | T             | 38            | 30           | 8             | 0:01.68                         |
| 87        | T             | 31            | 25           | 6             | 0:01.38                         |
| 88        | T             | 18            | 16           | 2             | 0:00.81                         |

| <b>Id</b> | <b>Result</b> | <b>#total</b> | <b>#true</b> | <b>#false</b> | <b>Execution time (min:sec)</b> |
|-----------|---------------|---------------|--------------|---------------|---------------------------------|
| 89        | T             | 14            | 13           | 1             | 0:00.64                         |
| 90        | T             | 21            | 18           | 3             | 0:00.94                         |
| 91        | T             | 24            | 20           | 4             | 0:01.08                         |
| 92        | T             | 18            | 16           | 2             | 0:00.81                         |
| 93        | T             | 14            | 13           | 1             | 0:00.65                         |
| 94        | T             | 14            | 13           | 1             | 0:00.65                         |
| 95        | T             | 18            | 16           | 2             | 0:00.81                         |
| 96        | T             | 18            | 16           | 2             | 0:00.82                         |
| 97        | T             | 31            | 25           | 6             | 0:01.35                         |
| 98        | T             | 24            | 20           | 4             | 0:01.07                         |
| 99        | T             | 14            | 14           | 0             | 0:00.64                         |
| 100       | T             | 14            | 13           | 1             | 0:00.64                         |
| 101       | T             | 38            | 30           | 8             | 0:01.66                         |
| 102       | T             | 41            | 32           | 9             | 0:01.80                         |
| 103       | T             | 14            | 13           | 1             | 0:00.65                         |
| 104       | T             | 14            | 13           | 1             | 0:00.64                         |
| 105       | T             | 14            | 13           | 1             | 0:00.64                         |
| 106       | T             | 18            | 16           | 2             | 0:00.80                         |
| 107       | T             | 24            | 20           | 4             | 0:01.08                         |
| 108       | T             | 31            | 25           | 6             | 0:01.39                         |
| 109       | T             | 21            | 18           | 3             | 0:00.95                         |
| 110       | T             | 18            | 16           | 2             | 0:00.81                         |
| 111       | T             | 18            | 16           | 2             | 0:00.81                         |
| 112       | T             | 21            | 18           | 3             | 0:00.94                         |
| 113       | T             | 24            | 20           | 4             | 0:01.07                         |
| 114       | T             | 31            | 25           | 6             | 0:01.39                         |
| 115       | T             | 48            | 37           | 11            | 0:02.10                         |
| 116       | T             | 18            | 16           | 2             | 0:00.81                         |
| 117       | T             | 14            | 13           | 1             | 0:00.64                         |
| 118       | T             | 24            | 20           | 4             | 0:01.07                         |
| 119       | T             | 58            | 44           | 14            | 0:02.57                         |
| 120       | T             | 28            | 23           | 5             | 0:01.24                         |
| 121       | T             | 18            | 16           | 2             | 0:00.81                         |
| 122       | T             | 31            | 25           | 6             | 0:01.38                         |
| 123       | T             | 52            | 40           | 12            | 0:02.28                         |
| 124       | T             | 24            | 20           | 4             | 0:01.05                         |
| 125       | T             | 24            | 20           | 4             | 0:01.08                         |
| 126       | T             | 62            | 47           | 15            | 0:02.70                         |
| 127       | T             | 18            | 16           | 2             | 0:00.82                         |
| 128       | T             | 28            | 23           | 5             | 0:01.24                         |
| 129       | T             | 31            | 25           | 6             | 0:01.38                         |
| 130       | T             | 31            | 25           | 6             | 0:01.38                         |
| 131       | T             | 18            | 16           | 2             | 0:00.82                         |
| 132       | T             | 14            | 13           | 1             | 0:00.64                         |
| 133       | T             | 31            | 25           | 6             | 0:01.35                         |
| 134       | T             | 48            | 37           | 11            | 0:02.11                         |
| 135       | T             | 35            | 28           | 7             | 0:02.00                         |
| 136       | T             | 21            | 18           | 3             | 0:00.94                         |

| <b>Id</b> | <b>Result</b> | <b>#total</b> | <b>#true</b> | <b>#false</b> | <b>Execution time (min:sec)</b> |
|-----------|---------------|---------------|--------------|---------------|---------------------------------|
| 137       | T             | 38            | 30           | 8             | 0:01.67                         |
| 138       | T             | 52            | 40           | 12            | 0:02.26                         |
| 139       | T             | 14            | 13           | 1             | 0:00.66                         |
| 140       | T             | 14            | 13           | 1             | 0:00.64                         |
| 141       | T             | 14            | 13           | 1             | 0:00.64                         |
| 142       | T             | 14            | 14           | 0             | 0:00.64                         |
| 143       | T             | 24            | 20           | 4             | 0:01.09                         |
| 144       | T             | 24            | 20           | 4             | 0:01.08                         |
| 145       | T             | 31            | 25           | 6             | 0:01.37                         |
| 146       | T             | 41            | 32           | 9             | 0:01.80                         |
| 147       | T             | 45            | 35           | 10            | 0:01.98                         |
| 148       | T             | 38            | 30           | 8             | 0:01.68                         |
| 149       | T             | 14            | 13           | 1             | 0:00.64                         |
| 150       | T             | 14            | 13           | 1             | 0:00.64                         |
| 151       | T             | 14            | 13           | 1             | 0:00.65                         |
| 152       | T             | 41            | 32           | 9             | 0:01.83                         |
| 153       | T             | 45            | 35           | 10            | 0:01.98                         |
| 154       | T             | 14            | 14           | 0             | 0:00.64                         |
| 155       | T             | 89            | 66           | 23            | 0:03.89                         |
| 156       | T             | 31            | 25           | 6             | 0:01.37                         |
| 157       | T             | 21            | 18           | 3             | 0:00.94                         |
| 158       | T             | 14            | 14           | 0             | 0:00.69                         |
| 159       | T             | 31            | 25           | 6             | 0:01.50                         |
| 160       | T             | 14            | 14           | 0             | 0:00.64                         |
| 161       | T             | 14            | 14           | 0             | 0:00.64                         |
| 162       | T             | 18            | 16           | 2             | 0:00.82                         |
| 163       | T             | 38            | 30           | 8             | 0:01.69                         |
| 164       | T             | 14            | 13           | 1             | 0:00.68                         |
| 165       | T             | 24            | 20           | 4             | 0:01.08                         |
| 166       | T             | 1000          | 819          | 181           | 0:40.45                         |
| 167       | T             | 18            | 16           | 2             | 0:00.80                         |
| 168       | T             | 18            | 16           | 2             | 0:00.80                         |
| 169       | T             | 14            | 14           | 0             | 0:01.03                         |
| 170       | T             | 14            | 13           | 1             | 0:00.64                         |
| 171       | T             | 21            | 18           | 3             | 0:00.95                         |
| 172       | T             | 21            | 18           | 3             | 0:00.94                         |
| 173       | T             | 14            | 14           | 0             | 0:00.65                         |
| 174       | T             | 14            | 14           | 0             | 0:00.64                         |
| 175       | T             | 14            | 14           | 0             | 0:00.63                         |
| 176       | T             | 41            | 32           | 9             | 0:01.81                         |
| 177       | T             | 21            | 18           | 3             | 0:00.95                         |
| 178       | T             | 14            | 14           | 0             | 0:00.63                         |
| 179       | T             | 14            | 14           | 0             | 0:00.63                         |
| 180       | T             | 14            | 14           | 0             | 0:00.64                         |
| 181       | T             | 14            | 13           | 1             | 0:00.64                         |
| 182       | T             | 14            | 13           | 1             | 0:00.63                         |
| 183       | T             | 14            | 13           | 1             | 0:00.65                         |
| 184       | T             | 14            | 13           | 1             | 0:00.65                         |



| <b>Id</b> | <b>Result</b> | <b>#total</b> | <b>#true</b> | <b>#false</b> | <b>Execution time (min:sec)</b> |
|-----------|---------------|---------------|--------------|---------------|---------------------------------|
| 185       | T             | 35            | 28           | 7             | 0:01.55                         |
| 186       | T             | 14            | 13           | 1             | 0:00.65                         |
| 187       | T             | 14            | 13           | 1             | 0:00.66                         |
| 188       | T             | 14            | 13           | 1             | 0:00.63                         |
| 189       | T             | 24            | 20           | 4             | 0:01.08                         |
| 190       | T             | 24            | 20           | 4             | 0:01.09                         |
| 191       | T             | 14            | 13           | 1             | 0:00.64                         |
| 192       | T             | 35            | 28           | 7             | 0:01.55                         |
| 193       | T             | 14            | 14           | 0             | 0:00.64                         |
| 194       | T             | 24            | 20           | 4             | 0:01.07                         |
| 195       | T             | 41            | 32           | 9             | 0:01.81                         |
| 196       | T             | 14            | 13           | 1             | 0:00.65                         |
| 197       | T             | 14            | 13           | 1             | 0:00.64                         |
| 198       | T             | 18            | 16           | 2             | 0:00.81                         |
| 199       | T             | 24            | 20           | 4             | 0:01.06                         |
| 200       | T             | 35            | 28           | 7             | 0:01.53                         |
| 201       | T             | 21            | 18           | 3             | 0:00.95                         |
| 202       | T             | 24            | 20           | 4             | 0:01.05                         |
| 203       | T             | 24            | 20           | 4             | 0:01.06                         |
| 204       | T             | 41            | 32           | 9             | 0:01.79                         |
| 205       | T             | 58            | 44           | 14            | 0:02.53                         |
| 206       | T             | 65            | 49           | 16            | 0:03.72                         |
| 207       | T             | 31            | 25           | 6             | 0:01.37                         |
| 208       | T             | 38            | 30           | 8             | 0:01.69                         |
| 209       | T             | 72            | 54           | 18            | 0:03.16                         |
| 210       | T             | 28            | 23           | 5             | 0:01.24                         |
| 211       | T             | 14            | 13           | 1             | 0:00.64                         |
| 212       | T             | 28            | 23           | 5             | 0:01.25                         |
| 213       | T             | 89            | 66           | 23            | 0:03.86                         |
| 214       | T             | 18            | 16           | 2             | 0:00.82                         |
| 215       | T             | 24            | 20           | 4             | 0:01.08                         |
| 216       | T             | 14            | 13           | 1             | 0:00.64                         |
| 217       | T             | 14            | 13           | 1             | 0:00.64                         |
| 218       | T             | 14            | 13           | 1             | 0:00.65                         |
| 219       | T             | 14            | 13           | 1             | 0:00.65                         |
| 220       | T             | 14            | 13           | 1             | 0:00.65                         |
| 221       | T             | 18            | 16           | 2             | 0:00.82                         |
| 222       | T             | 24            | 20           | 4             | 0:01.08                         |
| 223       | T             | 14            | 13           | 1             | 0:00.63                         |
| 224       | T             | 18            | 16           | 2             | 0:00.80                         |
| 225       | T             | 18            | 16           | 2             | 0:00.80                         |
| 226       | T             | 38            | 30           | 8             | 0:01.67                         |
| 227       | T             | 28            | 23           | 5             | 0:01.27                         |
| 228       | T             | 14            | 13           | 1             | 0:00.64                         |
| 229       | T             | 35            | 28           | 7             | 0:01.55                         |
| 230       | T             | 21            | 18           | 3             | 0:00.93                         |
| 231       | T             | 24            | 20           | 4             | 0:01.09                         |
| 232       | T             | 28            | 23           | 5             | 0:01.25                         |

| <b>Id</b> | <b>Result</b> | <b>#total</b> | <b>#true</b> | <b>#false</b> | <b>Execution time (min:sec)</b> |
|-----------|---------------|---------------|--------------|---------------|---------------------------------|
| 233       | T             | 41            | 32           | 9             | 0:01.79                         |
| 234       | T             | 18            | 16           | 2             | 0:00.82                         |
| 235       | T             | 18            | 16           | 2             | 0:00.82                         |
| 236       | T             | 21            | 18           | 3             | 0:00.95                         |
| 237       | T             | 58            | 44           | 14            | 0:02.55                         |
| 238       | T             | 14            | 13           | 1             | 0:00.66                         |
| 239       | T             | 14            | 13           | 1             | 0:00.66                         |
| 240       | T             | 21            | 18           | 3             | 0:00.95                         |
| 241       | T             | 18            | 16           | 2             | 0:00.81                         |
| 242       | T             | 72            | 54           | 18            | 0:03.15                         |
| 243       | T             | 14            | 14           | 0             | 0:00.64                         |
| 244       | T             | 14            | 13           | 1             | 0:00.64                         |
| 245       | T             | 14            | 13           | 1             | 0:00.64                         |
| 246       | T             | 35            | 28           | 7             | 0:01.53                         |
| 247       | T             | 14            | 13           | 1             | 0:00.64                         |
| 248       | T             | 14            | 13           | 1             | 0:00.64                         |
| 249       | T             | 31            | 25           | 6             | 0:01.39                         |
| 250       | T             | 62            | 47           | 15            | 0:02.68                         |
| 251       | T             | 14            | 13           | 1             | 0:00.66                         |
| 252       | T             | 14            | 13           | 1             | 0:00.64                         |
| 253       | T             | 14            | 13           | 1             | 0:00.64                         |
| 254       | T             | 14            | 14           | 0             | 0:00.64                         |
| 255       | T             | 21            | 18           | 3             | 0:00.96                         |
| 256       | T             | 14            | 14           | 0             | 0:00.64                         |
| 257       | T             | 14            | 14           | 0             | 0:00.64                         |
| 258       | T             | 14            | 13           | 1             | 0:00.63                         |
| 259       | T             | 14            | 13           | 1             | 0:00.63                         |
| 260       | T             | 28            | 23           | 5             | 0:01.27                         |
| 261       | T             | 55            | 42           | 13            | 0:02.40                         |
| 262       | T             | 76            | 57           | 19            | 0:03.32                         |
| 263       | T             | 14            | 13           | 1             | 0:00.66                         |
| 264       | T             | 21            | 18           | 3             | 0:00.95                         |
| 265       | T             | 58            | 44           | 14            | 0:02.53                         |
| 266       | T             | 35            | 28           | 7             | 0:01.55                         |
| 267       | T             | 21            | 18           | 3             | 0:00.93                         |
| 268       | T             | 41            | 32           | 9             | 0:01.80                         |
| 269       | T             | 14            | 13           | 1             | 0:00.64                         |
| 270       | T             | 14            | 13           | 1             | 0:00.64                         |
| 271       | T             | 38            | 30           | 8             | 0:01.64                         |
| 272       | T             | 35            | 28           | 7             | 0:01.57                         |
| 273       | T             | 38            | 30           | 8             | 0:01.67                         |
| 274       | T             | 14            | 13           | 1             | 0:00.65                         |
| 275       | T             | 14            | 13           | 1             | 0:00.64                         |
| 276       | T             | 21            | 18           | 3             | 0:00.95                         |
| 277       | T             | 31            | 25           | 6             | 0:01.38                         |
| 278       | T             | 31            | 25           | 6             | 0:01.37                         |
| 279       | T             | 14            | 14           | 0             | 0:00.74                         |
| 280       | T             | 14            | 14           | 0             | 0:00.64                         |

| <b>Id</b> | <b>Result</b> | <b>#total</b> | <b>#true</b> | <b>#false</b> | <b>Execution time (min:sec)</b> |
|-----------|---------------|---------------|--------------|---------------|---------------------------------|
| 281       | T             | 14            | 14           | 0             | 0:00.64                         |
| 282       | T             | 28            | 23           | 5             | 0:01.78                         |
| 283       | T             | 65            | 49           | 16            | 0:02.84                         |
| 284       | T             | 31            | 25           | 6             | 0:01.37                         |
| 285       | T             | 21            | 18           | 3             | 0:00.93                         |
| 286       | F             | 85            | 57           | 28            | 0:03.75                         |
| 287       | T             | 28            | 23           | 5             | 0:01.23                         |
| 288       | T             | 21            | 18           | 3             | 0:00.95                         |
| 289       | T             | 28            | 23           | 5             | 0:01.23                         |
| 290       | T             | 21            | 18           | 3             | 0:00.96                         |
| 291       | T             | 14            | 13           | 1             | 0:00.64                         |
| 292       | T             | 24            | 20           | 4             | 0:01.06                         |
| 293       | T             | 24            | 20           | 4             | 0:01.06                         |
| 294       | T             | 28            | 23           | 5             | 0:01.26                         |
| 295       | T             | 21            | 18           | 3             | 0:00.96                         |
| 296       | T             | 48            | 37           | 11            | 0:02.10                         |
| 297       | T             | 14            | 13           | 1             | 0:00.63                         |
| 298       | T             | 35            | 28           | 7             | 0:01.55                         |
| 299       | T             | 18            | 16           | 2             | 0:00.82                         |
| 300       | T             | 45            | 35           | 10            | 0:01.99                         |
| 301       | T             | 14            | 13           | 1             | 0:00.63                         |
| 302       | T             | 35            | 28           | 7             | 0:01.56                         |
| 303       | T             | 35            | 28           | 7             | 0:01.55                         |
| 304       | T             | 14            | 13           | 1             | 0:00.64                         |
| 305       | T             | 35            | 28           | 7             | 0:01.56                         |
| 306       | T             | 24            | 20           | 4             | 0:01.08                         |
| 307       | T             | 14            | 13           | 1             | 0:00.64                         |
| 308       | T             | 21            | 18           | 3             | 0:00.95                         |
| 309       | T             | 18            | 16           | 2             | 0:00.82                         |
| 310       | T             | 14            | 13           | 1             | 0:00.65                         |
| 311       | T             | 14            | 13           | 1             | 0:00.64                         |
| 312       | T             | 62            | 47           | 15            | 0:02.72                         |
| 313       | T             | 21            | 18           | 3             | 0:00.94                         |
| 314       | T             | 14            | 13           | 1             | 0:00.64                         |
| 315       | T             | 14            | 13           | 1             | 0:00.64                         |
| 316       | T             | 28            | 23           | 5             | 0:01.25                         |
| 317       | T             | 14            | 14           | 0             | 0:00.64                         |
| 318       | T             | 31            | 25           | 6             | 0:01.37                         |
| 319       | T             | 14            | 13           | 1             | 0:00.64                         |
| 320       | T             | 18            | 16           | 2             | 0:00.80                         |
| 321       | T             | 28            | 23           | 5             | 0:01.27                         |
| 322       | T             | 38            | 30           | 8             | 0:01.67                         |
| 323       | T             | 14            | 13           | 1             | 0:00.64                         |
| 324       | T             | 14            | 13           | 1             | 0:00.65                         |
| 325       | T             | 14            | 13           | 1             | 0:00.64                         |
| 326       | T             | 14            | 13           | 1             | 0:00.64                         |
| 327       | T             | 14            | 13           | 1             | 0:00.64                         |
| 328       | T             | 14            | 14           | 0             | 0:00.64                         |

| <b>Id</b> | <b>Result</b> | <b>#total</b> | <b>#true</b> | <b>#false</b> | <b>Execution time (min:sec)</b> |
|-----------|---------------|---------------|--------------|---------------|---------------------------------|
| 329       | T             | 18            | 16           | 2             | 0:00.82                         |
| 330       | T             | 28            | 23           | 5             | 0:01.25                         |
| 331       | T             | 24            | 20           | 4             | 0:01.07                         |
| 332       | T             | 14            | 13           | 1             | 0:00.65                         |
| 333       | T             | 1000          | 819          | 181           | 0:41.40                         |
| 334       | T             | 14            | 13           | 1             | 0:00.64                         |
| 335       | T             | 14            | 14           | 0             | 0:00.65                         |
| 336       | T             | 14            | 14           | 0             | 0:00.64                         |
| 337       | T             | 24            | 20           | 4             | 0:01.07                         |
| 338       | T             | 14            | 13           | 1             | 0:00.63                         |
| 339       | T             | 38            | 30           | 8             | 0:01.68                         |
| 340       | T             | 62            | 47           | 15            | 0:02.67                         |
| 341       | T             | 28            | 23           | 5             | 0:01.25                         |
| 342       | T             | 41            | 32           | 9             | 0:01.79                         |
| 343       | T             | 14            | 13           | 1             | 0:00.64                         |
| 344       | T             | 21            | 18           | 3             | 0:01.15                         |
| 345       | T             | 28            | 23           | 5             | 0:01.24                         |
| 346       | T             | 31            | 25           | 6             | 0:01.37                         |
| 347       | T             | 24            | 20           | 4             | 0:01.07                         |
| 348       | T             | 21            | 18           | 3             | 0:00.96                         |
| 349       | T             | 35            | 28           | 7             | 0:01.54                         |
| 350       | T             | 14            | 13           | 1             | 0:00.64                         |
| 351       | T             | 14            | 13           | 1             | 0:00.64                         |
| 352       | T             | 14            | 13           | 1             | 0:00.64                         |
| 353       | T             | 14            | 14           | 0             | 0:00.64                         |
| 354       | T             | 65            | 49           | 16            | 0:02.88                         |
| 355       | T             | 28            | 23           | 5             | 0:01.24                         |
| 356       | T             | 18            | 16           | 2             | 0:00.82                         |
| 357       | T             | 14            | 13           | 1             | 0:00.65                         |
| 358       | T             | 14            | 13           | 1             | 0:00.64                         |
| 359       | T             | 18            | 16           | 2             | 0:00.81                         |
| 360       | T             | 48            | 37           | 11            | 0:02.13                         |
| 361       | T             | 21            | 18           | 3             | 0:00.94                         |
| 362       | T             | 18            | 16           | 2             | 0:01.12                         |
| 363       | T             | 55            | 42           | 13            | 0:02.43                         |
| 364       | T             | 24            | 20           | 4             | 0:01.07                         |
| 365       | T             | 14            | 13           | 1             | 0:00.64                         |
| 366       | T             | 14            | 13           | 1             | 0:00.64                         |
| 367       | T             | 21            | 18           | 3             | 0:00.94                         |
| 368       | T             | 21            | 18           | 3             | 0:00.94                         |
| 369       | T             | 28            | 23           | 5             | 0:01.26                         |
| 370       | T             | 21            | 18           | 3             | 0:00.95                         |
| 371       | T             | 31            | 25           | 6             | 0:01.36                         |
| 372       | T             | 62            | 47           | 15            | 0:02.73                         |
| 373       | T             | 41            | 32           | 9             | 0:01.81                         |
| 374       | T             | 24            | 20           | 4             | 0:01.09                         |
| 375       | T             | 28            | 23           | 5             | 0:01.25                         |
| 376       | T             | 45            | 35           | 10            | 0:01.98                         |

| <b>Id</b> | <b>Result</b> | <b>#total</b> | <b>#true</b> | <b>#false</b> | <b>Execution time (min:sec)</b> |
|-----------|---------------|---------------|--------------|---------------|---------------------------------|
| 377       | T             | 21            | 18           | 3             | 0:00.94                         |
| 378       | T             | 18            | 16           | 2             | 0:00.82                         |
| 379       | T             | 28            | 23           | 5             | 0:01.25                         |
| 380       | T             | 65            | 49           | 16            | 0:02.79                         |
| 381       | T             | 14            | 13           | 1             | 0:00.64                         |
| 382       | T             | 24            | 20           | 4             | 0:01.08                         |
| 383       | T             | 14            | 13           | 1             | 0:00.64                         |
| 384       | T             | 28            | 23           | 5             | 0:01.25                         |
| 385       | T             | 14            | 13           | 1             | 0:00.65                         |
| 386       | T             | 21            | 18           | 3             | 0:01.51                         |
| 387       | T             | 14            | 14           | 0             | 0:00.64                         |
| 388       | T             | 14            | 13           | 1             | 0:00.63                         |
| 389       | T             | 14            | 13           | 1             | 0:00.63                         |
| 390       | T             | 18            | 16           | 2             | 0:00.83                         |
| 391       | T             | 14            | 13           | 1             | 0:00.64                         |
| 392       | T             | 14            | 13           | 1             | 0:00.64                         |
| 393       | T             | 35            | 28           | 7             | 0:01.55                         |
| 394       | T             | 14            | 13           | 1             | 0:00.64                         |
| 395       | T             | 14            | 13           | 1             | 0:00.65                         |
| 396       | T             | 14            | 14           | 0             | 0:00.64                         |
| 397       | T             | 28            | 23           | 5             | 0:01.25                         |
| 398       | T             | 24            | 20           | 4             | 0:01.06                         |
| 399       | T             | 35            | 28           | 7             | 0:01.56                         |
| 400       | T             | 24            | 20           | 4             | 0:01.07                         |
| 401       | T             | 14            | 13           | 1             | 0:00.64                         |
| 402       | T             | 14            | 13           | 1             | 0:00.65                         |
| 403       | T             | 24            | 20           | 4             | 0:01.08                         |
| 404       | T             | 14            | 13           | 1             | 0:00.65                         |
| 405       | T             | 14            | 13           | 1             | 0:00.64                         |
| 406       | T             | 14            | 13           | 1             | 0:00.64                         |
| 407       | T             | 38            | 30           | 8             | 0:01.68                         |
| 408       | T             | 14            | 13           | 1             | 0:00.65                         |
| 409       | T             | 14            | 13           | 1             | 0:00.64                         |
| 410       | T             | 14            | 13           | 1             | 0:00.64                         |
| 411       | T             | 21            | 18           | 3             | 0:00.93                         |
| 412       | T             | 18            | 16           | 2             | 0:00.82                         |
| 413       | T             | 18            | 16           | 2             | 0:00.82                         |
| 414       | T             | 21            | 18           | 3             | 0:00.97                         |
| 415       | T             | 14            | 13           | 1             | 0:00.63                         |
| 416       | T             | 28            | 23           | 5             | 0:01.23                         |
| 417       | T             | 21            | 18           | 3             | 0:00.96                         |
| 418       | T             | 14            | 14           | 0             | 0:00.64                         |
| 419       | T             | 24            | 20           | 4             | 0:01.08                         |
| 420       | T             | 38            | 30           | 8             | 0:01.68                         |
| 421       | T             | 14            | 13           | 1             | 0:00.64                         |
| 422       | T             | 14            | 13           | 1             | 0:00.63                         |
| 423       | T             | 28            | 23           | 5             | 0:01.22                         |
| 424       | T             | 24            | 20           | 4             | 0:01.10                         |

| <b>Id</b> | <b>Result</b> | <b>#total</b> | <b>#true</b> | <b>#false</b> | <b>Execution time (min:sec)</b> |
|-----------|---------------|---------------|--------------|---------------|---------------------------------|
| 425       | T             | 24            | 20           | 4             | 0:01.07                         |
| 426       | T             | 21            | 18           | 3             | 0:00.94                         |
| 427       | T             | 55            | 42           | 13            | 0:02.40                         |
| 428       | T             | 38            | 30           | 8             | 0:01.68                         |
| 429       | T             | 24            | 20           | 4             | 0:01.07                         |
| 430       | T             | 24            | 20           | 4             | 0:01.08                         |
| 431       | T             | 38            | 30           | 8             | 0:01.68                         |
| 432       | T             | 14            | 14           | 0             | 0:00.64                         |
| 433       | T             | 58            | 44           | 14            | 0:02.50                         |
| 434       | T             | 38            | 30           | 8             | 0:01.70                         |
| 435       | T             | 28            | 23           | 5             | 0:01.25                         |
| 436       | T             | 45            | 35           | 10            | 0:01.96                         |
| 437       | T             | 24            | 20           | 4             | 0:01.07                         |
| 438       | T             | 35            | 28           | 7             | 0:01.53                         |
| 439       | T             | 45            | 35           | 10            | 0:02.00                         |
| 440       | T             | 14            | 14           | 0             | 0:00.64                         |
| 441       | T             | 31            | 25           | 6             | 0:01.36                         |
| 442       | T             | 38            | 30           | 8             | 0:01.68                         |
| 443       | T             | 21            | 18           | 3             | 0:00.96                         |
| 444       | T             | 31            | 25           | 6             | 0:01.39                         |
| 445       | T             | 21            | 18           | 3             | 0:00.95                         |
| 446       | T             | 24            | 20           | 4             | 0:01.08                         |
| 447       | T             | 38            | 30           | 8             | 0:01.70                         |
| 448       | T             | 14            | 13           | 1             | 0:00.65                         |
| 449       | T             | 14            | 13           | 1             | 0:00.64                         |
| 450       | T             | 31            | 25           | 6             | 0:01.38                         |
| 451       | T             | 24            | 20           | 4             | 0:01.07                         |
| 452       | T             | 35            | 28           | 7             | 0:01.56                         |
| 453       | T             | 14            | 13           | 1             | 0:00.63                         |
| 454       | T             | 21            | 18           | 3             | 0:00.95                         |
| 455       | T             | 62            | 47           | 15            | 0:02.68                         |
| 456       | T             | 14            | 13           | 1             | 0:00.64                         |
| 457       | T             | 24            | 20           | 4             | 0:01.07                         |
| 458       | T             | 24            | 20           | 4             | 0:01.06                         |
| 459       | T             | 28            | 23           | 5             | 0:01.25                         |
| 460       | T             | 18            | 16           | 2             | 0:00.81                         |
| 461       | T             | 14            | 13           | 1             | 0:00.64                         |
| 462       | T             | 28            | 23           | 5             | 0:01.22                         |
| 463       | T             | 31            | 25           | 6             | 0:01.35                         |
| 464       | T             | 24            | 20           | 4             | 0:01.08                         |
| 465       | T             | 14            | 13           | 1             | 0:00.65                         |
| 466       | T             | 14            | 13           | 1             | 0:00.65                         |
| 467       | T             | 82            | 61           | 21            | 0:03.55                         |
| 468       | T             | 24            | 20           | 4             | 0:01.07                         |
| 469       | T             | 28            | 23           | 5             | 0:01.24                         |
| 470       | T             | 55            | 42           | 13            | 0:02.41                         |
| 471       | T             | 58            | 44           | 14            | 0:02.54                         |
| 472       | T             | 55            | 42           | 13            | 0:02.43                         |

| <b>Id</b> | <b>Result</b> | <b>#total</b> | <b>#true</b> | <b>#false</b> | <b>Execution time (min:sec)</b> |
|-----------|---------------|---------------|--------------|---------------|---------------------------------|
| 473       | T             | 21            | 18           | 3             | 0:00.95                         |
| 474       | T             | 18            | 16           | 2             | 0:00.80                         |
| 475       | T             | 21            | 18           | 3             | 0:00.94                         |
| 476       | T             | 14            | 13           | 1             | 0:00.64                         |
| 477       | T             | 41            | 32           | 9             | 0:01.81                         |
| 478       | T             | 18            | 16           | 2             | 0:00.81                         |
| 479       | T             | 35            | 28           | 7             | 0:01.56                         |
| 480       | T             | 14            | 13           | 1             | 0:00.65                         |
| 481       | T             | 69            | 52           | 17            | 0:03.04                         |
| 482       | T             | 14            | 13           | 1             | 0:00.65                         |
| 483       | T             | 14            | 13           | 1             | 0:00.65                         |
| 484       | T             | 14            | 13           | 1             | 0:00.65                         |
| 485       | T             | 79            | 59           | 20            | 0:03.46                         |
| 486       | T             | 41            | 32           | 9             | 0:01.81                         |
| 487       | T             | 28            | 23           | 5             | 0:01.24                         |
| 488       | T             | 14            | 13           | 1             | 0:00.64                         |
| 489       | T             | 24            | 20           | 4             | 0:01.08                         |
| 490       | T             | 89            | 66           | 23            | 0:03.86                         |
| 491       | T             | 21            | 18           | 3             | 0:00.94                         |
| 492       | T             | 58            | 44           | 14            | 0:02.53                         |
| 493       | T             | 48            | 37           | 11            | 0:02.13                         |
| 494       | T             | 41            | 32           | 9             | 0:01.81                         |
| 495       | T             | 24            | 20           | 4             | 0:01.07                         |
| 496       | T             | 21            | 18           | 3             | 0:00.95                         |
| 497       | T             | 14            | 13           | 1             | 0:00.64                         |
| 498       | T             | 18            | 16           | 2             | 0:00.82                         |
| 499       | T             | 18            | 16           | 2             | 0:00.83                         |
| 500       | T             | 52            | 40           | 12            | 0:02.27                         |
