# Supplementary material for: Automatic validation of computational models using pseudo-3D spatio-temporal model checking
Source: PubMed Central journal article supplement (PMC4272535; doi:10.1186/s12918-014-0124-0), 2014-12-02
Supplement: 12918_2014_124_MOESM11_ESM.pdf [file 12918_2014_124_MOESM11_ESM.pdf]

## Model checking results for the chemotaxis case study

For the convenience of the reader the set of PBLSTL statements considered for the chemotaxis case study will be restated below:

$$\begin{aligned}
 P \geq 0.9 [F [0, 200] (&count(filter(clusters, (centroidX < \\
 &add(703.5, sqrt(subtract(2500, power(subtract(678.5, \\
 &centroidY), 2)))))) \wedge (centroidX > subtract( \\
 &703.5, sqrt(subtract(2500, power(subtract(678.5, \\
 &centroidY), 2)))))) \wedge (centroidY < add(678.5, \\
 &50)) \wedge (centroidY > subtract(678.5, 50)))] \geq 1]. \quad (9)
 \end{aligned}$$

$$\begin{aligned}
 P \geq 0.8 [F [0, 200] (&d(avg(clusters, clusteredness)) > 0) \wedge \\
 &(X (F [0, 200] (d(avg(clusters, clusteredness)) \\
 &> 0) \wedge (X (F [0, 200] (d(avg(clusters, \\
 &clusteredness)) > 0) \wedge (X (F [0, 200] (d(avg( \\
 &clusters, clusteredness)) > 0) \wedge (X (F [0, 200] \\
 &(d(avg(clusters, clusteredness)) > 0)))))))]). \quad (10)
 \end{aligned}$$

$$P \leq 0.05 [F [0, 50] (\{avgClusterednessClusters\} < 0.5)]. \quad (11)$$

$$\begin{aligned}
 P > 0.75 [F [0, 200] (&count(clusters) \leq 5 \wedge \\
 &G [0, 200] (count(clusters) \leq 5))]. \quad (12)
 \end{aligned}$$

$$\begin{aligned}
 P \geq 0.6 [F [0, 200] (&count(filter(clusters, (circleMeasure \\
 &> triangleMeasure) \wedge (circleMeasure > \\
 &rectangleMeasure))) > 0)]. \quad (13)
 \end{aligned}$$

$$\begin{aligned}
P < 0.1 [\neg ((F [0, 200] ((count(clusters) > 0) \wedge \\
& (d(avg(clusters, density)) > 0) \wedge \\
& F [0, 200] ((d(avg(clusters, density)) < 0)))) \vee \\
& (F [0, 200] ((count(clusters) > 0) \wedge \\
& (d(avg(clusters, density)) < 0) \wedge \\
& F [0, 200] ((d(avg(clusters, density)) > 0)))))].
\end{aligned} \tag{14}$$

Each table describes the results corresponding to one of the PBLSTL statements. The first column of each row represents the identifier of the model checking execution. The second column represents the evaluation result (T = true, F = false) of the PBLSTL statement for that particular model checker execution. The number of STML files against which the PBLSTL statement was executed, respectively how many of them evaluated true and how many evaluated false is provided in columns three, four and five. Finally column six presents the execution time (minutes:seconds format) corresponding to each model checker run. All executions of the model checker employed the frequentist statistical model checking approach with both probability of type I and type II errors equal to 5%. The path to an extra evaluation program was made available via a command line parameter such that Mudi could generate simulations (and implicitly STML files) on demand; the extra evaluation time was set to 60 (minutes) and was never exceeded in our experiments. In order to keep the chemotaxis and the phase variation model checking results comparable the extra evaluation time should not be considered. Thus the execution times reported in the table below have been recorded during a repeated evaluation of the PBLSTL statements when sufficient STML files were available and no extra evaluation was required.

Table 1: Model checking results corresponding to logic property 9

| <b>Id</b> | <b>Result</b> | <b>#total</b> | <b>#true</b> | <b>#false</b> | <b>Execution time (min:sec)</b> |
|-----------|---------------|---------------|--------------|---------------|---------------------------------|
| 1         | T             | 28            | 28           | 0             | 0:21.99                         |
| 2         | T             | 28            | 28           | 0             | 0:22.11                         |
| 3         | T             | 28            | 28           | 0             | 0:22.08                         |
| 4         | T             | 28            | 28           | 0             | 0:22.06                         |
| 5         | T             | 28            | 28           | 0             | 0:22.20                         |
| 6         | T             | 28            | 28           | 0             | 0:22.00                         |
| 7         | T             | 28            | 28           | 0             | 0:21.99                         |
| 8         | T             | 28            | 28           | 0             | 0:22.17                         |
| 9         | T             | 28            | 28           | 0             | 0:22.09                         |
| 10        | T             | 28            | 28           | 0             | 0:22.19                         |
| 11        | T             | 28            | 28           | 0             | 0:22.06                         |
| 12        | T             | 28            | 28           | 0             | 0:21.95                         |
| 13        | T             | 28            | 28           | 0             | 0:22.04                         |
| 14        | T             | 28            | 28           | 0             | 0:21.94                         |
| 15        | T             | 28            | 28           | 0             | 0:22.02                         |
| 16        | T             | 28            | 28           | 0             | 0:22.03                         |
| 17        | T             | 28            | 28           | 0             | 0:21.94                         |

| <b>Id</b> | <b>Result</b> | <b>#total</b> | <b>#true</b> | <b>#false</b> | <b>Execution time (min:sec)</b> |
|-----------|---------------|---------------|--------------|---------------|---------------------------------|
| 18        | T             | 28            | 28           | 0             | 0:22.08                         |
| 19        | T             | 28            | 28           | 0             | 0:22.05                         |
| 20        | T             | 28            | 28           | 0             | 0:22.05                         |
| 21        | T             | 28            | 28           | 0             | 0:22.05                         |
| 22        | T             | 28            | 28           | 0             | 0:22.25                         |
| 23        | T             | 28            | 28           | 0             | 0:22.05                         |
| 24        | T             | 28            | 28           | 0             | 0:22.04                         |
| 25        | T             | 28            | 28           | 0             | 0:22.07                         |
| 26        | T             | 28            | 28           | 0             | 0:22.06                         |
| 27        | T             | 28            | 28           | 0             | 0:21.98                         |
| 28        | T             | 28            | 28           | 0             | 0:22.18                         |
| 29        | T             | 28            | 28           | 0             | 0:21.92                         |
| 30        | T             | 28            | 28           | 0             | 0:22.18                         |
| 31        | T             | 28            | 28           | 0             | 0:22.14                         |
| 32        | T             | 28            | 28           | 0             | 0:22.14                         |
| 33        | T             | 28            | 28           | 0             | 0:22.03                         |
| 34        | T             | 28            | 28           | 0             | 0:21.98                         |
| 35        | T             | 28            | 28           | 0             | 0:22.20                         |
| 36        | T             | 28            | 28           | 0             | 0:22.28                         |
| 37        | T             | 28            | 28           | 0             | 0:22.03                         |
| 38        | T             | 28            | 28           | 0             | 0:22.00                         |
| 39        | T             | 28            | 28           | 0             | 0:22.06                         |
| 40        | T             | 28            | 28           | 0             | 0:22.13                         |
| 41        | T             | 28            | 28           | 0             | 0:22.04                         |
| 42        | T             | 28            | 28           | 0             | 0:21.93                         |
| 43        | T             | 28            | 28           | 0             | 0:22.05                         |
| 44        | T             | 28            | 28           | 0             | 0:22.03                         |
| 45        | T             | 28            | 28           | 0             | 0:22.05                         |
| 46        | T             | 28            | 28           | 0             | 0:22.10                         |
| 47        | T             | 28            | 28           | 0             | 0:22.07                         |
| 48        | T             | 28            | 28           | 0             | 0:22.08                         |
| 49        | T             | 28            | 28           | 0             | 0:22.03                         |
| 50        | T             | 28            | 28           | 0             | 0:21.94                         |
| 51        | T             | 28            | 28           | 0             | 0:22.02                         |
| 52        | T             | 28            | 28           | 0             | 0:22.03                         |
| 53        | T             | 28            | 28           | 0             | 0:22.08                         |
| 54        | T             | 28            | 28           | 0             | 0:22.18                         |
| 55        | T             | 28            | 28           | 0             | 0:22.11                         |
| 56        | T             | 28            | 28           | 0             | 0:22.09                         |
| 57        | T             | 28            | 28           | 0             | 0:22.10                         |
| 58        | T             | 28            | 28           | 0             | 0:22.30                         |
| 59        | T             | 28            | 28           | 0             | 0:21.97                         |
| 60        | T             | 28            | 28           | 0             | 0:22.10                         |
| 61        | T             | 28            | 28           | 0             | 0:22.03                         |
| 62        | T             | 28            | 28           | 0             | 0:21.91                         |
| 63        | T             | 28            | 28           | 0             | 0:22.03                         |
| 64        | T             | 28            | 28           | 0             | 0:22.23                         |
| 65        | T             | 28            | 28           | 0             | 0:21.94                         |

| Id  | Result | #total | #true | #false | Execution time (min:sec) |
|-----|--------|--------|-------|--------|--------------------------|
| 66  | T      | 28     | 28    | 0      | 0:22.05                  |
| 67  | T      | 28     | 28    | 0      | 0:22.17                  |
| 68  | T      | 28     | 28    | 0      | 0:22.03                  |
| 69  | T      | 28     | 28    | 0      | 0:21.92                  |
| 70  | T      | 28     | 28    | 0      | 0:22.09                  |
| 71  | T      | 28     | 28    | 0      | 0:21.95                  |
| 72  | T      | 28     | 28    | 0      | 0:22.01                  |
| 73  | T      | 28     | 28    | 0      | 0:21.89                  |
| 74  | T      | 28     | 28    | 0      | 0:21.92                  |
| 75  | T      | 28     | 28    | 0      | 0:21.90                  |
| 76  | T      | 28     | 28    | 0      | 0:22.07                  |
| 77  | T      | 28     | 28    | 0      | 0:22.14                  |
| 78  | T      | 28     | 28    | 0      | 0:22.03                  |
| 79  | T      | 28     | 28    | 0      | 0:22.13                  |
| 80  | T      | 28     | 28    | 0      | 0:21.94                  |
| 81  | T      | 28     | 28    | 0      | 0:22.01                  |
| 82  | T      | 28     | 28    | 0      | 0:22.26                  |
| 83  | T      | 28     | 28    | 0      | 0:22.13                  |
| 84  | T      | 28     | 28    | 0      | 0:21.92                  |
| 85  | T      | 28     | 28    | 0      | 0:21.98                  |
| 86  | T      | 28     | 28    | 0      | 0:21.91                  |
| 87  | T      | 28     | 28    | 0      | 0:21.98                  |
| 88  | T      | 28     | 28    | 0      | 0:21.86                  |
| 89  | T      | 28     | 28    | 0      | 0:21.94                  |
| 90  | T      | 28     | 28    | 0      | 0:22.13                  |
| 91  | T      | 28     | 28    | 0      | 0:22.02                  |
| 92  | T      | 28     | 28    | 0      | 0:22.04                  |
| 93  | T      | 28     | 28    | 0      | 0:22.23                  |
| 94  | T      | 28     | 28    | 0      | 0:22.04                  |
| 95  | T      | 28     | 28    | 0      | 0:22.15                  |
| 96  | T      | 28     | 28    | 0      | 0:21.98                  |
| 97  | T      | 28     | 28    | 0      | 0:21.88                  |
| 98  | T      | 28     | 28    | 0      | 0:22.02                  |
| 99  | T      | 28     | 28    | 0      | 0:22.07                  |
| 100 | T      | 28     | 28    | 0      | 0:21.96                  |
| 101 | T      | 28     | 28    | 0      | 0:22.00                  |
| 102 | T      | 28     | 28    | 0      | 0:21.99                  |
| 103 | T      | 28     | 28    | 0      | 0:22.06                  |
| 104 | T      | 28     | 28    | 0      | 0:22.03                  |
| 105 | T      | 28     | 28    | 0      | 0:22.01                  |
| 106 | T      | 28     | 28    | 0      | 0:22.04                  |
| 107 | T      | 28     | 28    | 0      | 0:21.94                  |
| 108 | T      | 28     | 28    | 0      | 0:21.99                  |
| 109 | T      | 28     | 28    | 0      | 0:22.07                  |
| 110 | T      | 28     | 28    | 0      | 0:21.98                  |
| 111 | T      | 28     | 28    | 0      | 0:22.00                  |
| 112 | T      | 28     | 28    | 0      | 0:21.91                  |
| 113 | T      | 28     | 28    | 0      | 0:22.04                  |

| <b>Id</b> | <b>Result</b> | <b>#total</b> | <b>#true</b> | <b>#false</b> | <b>Execution time (min:sec)</b> |
|-----------|---------------|---------------|--------------|---------------|---------------------------------|
| 114       | T             | 28            | 28           | 0             | 0:21.95                         |
| 115       | T             | 28            | 28           | 0             | 0:22.08                         |
| 116       | T             | 28            | 28           | 0             | 0:21.98                         |
| 117       | T             | 28            | 28           | 0             | 0:22.08                         |
| 118       | T             | 28            | 28           | 0             | 0:23.07                         |
| 119       | T             | 28            | 28           | 0             | 0:22.02                         |
| 120       | T             | 28            | 28           | 0             | 0:21.93                         |
| 121       | T             | 28            | 28           | 0             | 0:22.11                         |
| 122       | T             | 28            | 28           | 0             | 0:21.99                         |
| 123       | T             | 28            | 28           | 0             | 0:22.05                         |
| 124       | T             | 28            | 28           | 0             | 0:22.02                         |
| 125       | T             | 28            | 28           | 0             | 0:22.07                         |
| 126       | T             | 28            | 28           | 0             | 0:22.10                         |
| 127       | T             | 28            | 28           | 0             | 0:21.99                         |
| 128       | T             | 28            | 28           | 0             | 0:22.05                         |
| 129       | T             | 28            | 28           | 0             | 0:22.03                         |
| 130       | T             | 28            | 28           | 0             | 0:22.12                         |
| 131       | T             | 28            | 28           | 0             | 0:21.99                         |
| 132       | T             | 28            | 28           | 0             | 0:21.97                         |
| 133       | T             | 28            | 28           | 0             | 0:22.18                         |
| 134       | T             | 28            | 28           | 0             | 0:22.17                         |
| 135       | T             | 28            | 28           | 0             | 0:21.94                         |
| 136       | T             | 28            | 28           | 0             | 0:22.03                         |
| 137       | T             | 28            | 28           | 0             | 0:22.15                         |
| 138       | T             | 28            | 28           | 0             | 0:22.07                         |
| 139       | T             | 28            | 28           | 0             | 0:22.08                         |
| 140       | T             | 28            | 28           | 0             | 0:21.96                         |
| 141       | T             | 28            | 28           | 0             | 0:21.89                         |
| 142       | T             | 28            | 28           | 0             | 0:22.12                         |
| 143       | T             | 28            | 28           | 0             | 0:22.05                         |
| 144       | T             | 28            | 28           | 0             | 0:21.97                         |
| 145       | T             | 28            | 28           | 0             | 0:22.09                         |
| 146       | T             | 28            | 28           | 0             | 0:21.97                         |
| 147       | T             | 28            | 28           | 0             | 0:22.09                         |
| 148       | T             | 28            | 28           | 0             | 0:22.09                         |
| 149       | T             | 28            | 28           | 0             | 0:22.00                         |
| 150       | T             | 28            | 28           | 0             | 0:22.02                         |
| 151       | T             | 28            | 28           | 0             | 0:22.17                         |
| 152       | T             | 28            | 28           | 0             | 0:22.09                         |
| 153       | T             | 28            | 28           | 0             | 0:21.99                         |
| 154       | T             | 28            | 28           | 0             | 0:22.01                         |
| 155       | T             | 28            | 28           | 0             | 0:22.11                         |
| 156       | T             | 28            | 28           | 0             | 0:21.93                         |
| 157       | T             | 28            | 28           | 0             | 0:21.97                         |
| 158       | T             | 28            | 28           | 0             | 0:22.25                         |
| 159       | T             | 28            | 28           | 0             | 0:22.10                         |
| 160       | T             | 28            | 28           | 0             | 0:21.98                         |
| 161       | T             | 28            | 28           | 0             | 0:22.05                         |

| <b>Id</b> | <b>Result</b> | <b>#total</b> | <b>#true</b> | <b>#false</b> | <b>Execution time (min:sec)</b> |
|-----------|---------------|---------------|--------------|---------------|---------------------------------|
| 162       | T             | 28            | 28           | 0             | 0:21.94                         |
| 163       | T             | 28            | 28           | 0             | 0:22.02                         |
| 164       | T             | 28            | 28           | 0             | 0:22.00                         |
| 165       | T             | 28            | 28           | 0             | 0:22.08                         |
| 166       | T             | 28            | 28           | 0             | 0:22.34                         |
| 167       | T             | 28            | 28           | 0             | 0:21.98                         |
| 168       | T             | 28            | 28           | 0             | 0:22.00                         |
| 169       | T             | 28            | 28           | 0             | 0:22.08                         |
| 170       | T             | 28            | 28           | 0             | 0:23.50                         |
| 171       | T             | 28            | 28           | 0             | 0:22.10                         |
| 172       | T             | 28            | 28           | 0             | 0:21.96                         |
| 173       | T             | 28            | 28           | 0             | 0:22.08                         |
| 174       | T             | 28            | 28           | 0             | 0:22.11                         |
| 175       | T             | 28            | 28           | 0             | 0:22.09                         |
| 176       | T             | 28            | 28           | 0             | 0:21.87                         |
| 177       | T             | 28            | 28           | 0             | 0:21.98                         |
| 178       | T             | 28            | 28           | 0             | 0:22.16                         |
| 179       | T             | 28            | 28           | 0             | 0:21.95                         |
| 180       | T             | 28            | 28           | 0             | 0:21.99                         |
| 181       | T             | 28            | 28           | 0             | 0:22.07                         |
| 182       | T             | 28            | 28           | 0             | 0:21.94                         |
| 183       | T             | 28            | 28           | 0             | 0:21.88                         |
| 184       | T             | 28            | 28           | 0             | 0:22.10                         |
| 185       | T             | 28            | 28           | 0             | 0:22.02                         |
| 186       | T             | 28            | 28           | 0             | 0:22.01                         |
| 187       | T             | 28            | 28           | 0             | 0:21.94                         |
| 188       | T             | 28            | 28           | 0             | 0:22.22                         |
| 189       | T             | 28            | 28           | 0             | 0:21.97                         |
| 190       | T             | 28            | 28           | 0             | 0:21.95                         |
| 191       | T             | 28            | 28           | 0             | 0:22.11                         |
| 192       | T             | 28            | 28           | 0             | 0:22.13                         |
| 193       | T             | 28            | 28           | 0             | 0:22.12                         |
| 194       | T             | 28            | 28           | 0             | 0:22.04                         |
| 195       | T             | 28            | 28           | 0             | 0:21.97                         |
| 196       | T             | 28            | 28           | 0             | 0:22.03                         |
| 197       | T             | 28            | 28           | 0             | 0:22.03                         |
| 198       | T             | 28            | 28           | 0             | 0:21.97                         |
| 199       | T             | 28            | 28           | 0             | 0:22.09                         |
| 200       | T             | 28            | 28           | 0             | 0:22.04                         |
| 201       | T             | 28            | 28           | 0             | 0:21.98                         |
| 202       | T             | 28            | 28           | 0             | 0:22.10                         |
| 203       | T             | 28            | 28           | 0             | 0:22.83                         |
| 204       | T             | 28            | 28           | 0             | 0:22.11                         |
| 205       | T             | 28            | 28           | 0             | 0:21.95                         |
| 206       | T             | 28            | 28           | 0             | 0:22.04                         |
| 207       | T             | 28            | 28           | 0             | 0:22.08                         |
| 208       | T             | 28            | 28           | 0             | 0:22.06                         |
| 209       | T             | 28            | 28           | 0             | 0:22.11                         |

| <b>Id</b> | <b>Result</b> | <b>#total</b> | <b>#true</b> | <b>#false</b> | <b>Execution time (min:sec)</b> |
|-----------|---------------|---------------|--------------|---------------|---------------------------------|
| 210       | T             | 28            | 28           | 0             | 0:21.97                         |
| 211       | T             | 28            | 28           | 0             | 0:22.06                         |
| 212       | T             | 28            | 28           | 0             | 0:21.94                         |
| 213       | T             | 28            | 28           | 0             | 0:21.99                         |
| 214       | T             | 28            | 28           | 0             | 0:22.06                         |
| 215       | T             | 28            | 28           | 0             | 0:22.13                         |
| 216       | T             | 28            | 28           | 0             | 0:22.08                         |
| 217       | T             | 28            | 28           | 0             | 0:22.03                         |
| 218       | T             | 28            | 28           | 0             | 0:22.11                         |
| 219       | T             | 28            | 28           | 0             | 0:22.00                         |
| 220       | T             | 28            | 28           | 0             | 0:22.13                         |
| 221       | T             | 28            | 28           | 0             | 0:22.07                         |
| 222       | T             | 28            | 28           | 0             | 0:22.08                         |
| 223       | T             | 28            | 28           | 0             | 0:21.90                         |
| 224       | T             | 28            | 28           | 0             | 0:21.93                         |
| 225       | T             | 28            | 28           | 0             | 0:21.96                         |
| 226       | T             | 28            | 28           | 0             | 0:22.00                         |
| 227       | T             | 28            | 28           | 0             | 0:22.01                         |
| 228       | T             | 28            | 28           | 0             | 0:22.03                         |
| 229       | T             | 28            | 28           | 0             | 0:22.04                         |
| 230       | T             | 28            | 28           | 0             | 0:21.94                         |
| 231       | T             | 28            | 28           | 0             | 0:22.01                         |
| 232       | T             | 28            | 28           | 0             | 0:22.00                         |
| 233       | T             | 28            | 28           | 0             | 0:21.98                         |
| 234       | T             | 28            | 28           | 0             | 0:22.13                         |
| 235       | T             | 28            | 28           | 0             | 0:21.99                         |
| 236       | T             | 28            | 28           | 0             | 0:21.85                         |
| 237       | T             | 28            | 28           | 0             | 0:22.06                         |
| 238       | T             | 28            | 28           | 0             | 0:21.98                         |
| 239       | T             | 28            | 28           | 0             | 0:22.08                         |
| 240       | T             | 28            | 28           | 0             | 0:22.04                         |
| 241       | T             | 28            | 28           | 0             | 0:22.13                         |
| 242       | T             | 28            | 28           | 0             | 0:22.05                         |
| 243       | T             | 28            | 28           | 0             | 0:21.93                         |
| 244       | T             | 28            | 28           | 0             | 0:21.97                         |
| 245       | T             | 28            | 28           | 0             | 0:22.11                         |
| 246       | T             | 28            | 28           | 0             | 0:22.20                         |
| 247       | T             | 28            | 28           | 0             | 0:22.02                         |
| 248       | T             | 28            | 28           | 0             | 0:22.13                         |
| 249       | T             | 28            | 28           | 0             | 0:22.03                         |
| 250       | T             | 28            | 28           | 0             | 0:21.94                         |
| 251       | T             | 28            | 28           | 0             | 0:22.04                         |
| 252       | T             | 28            | 28           | 0             | 0:21.88                         |
| 253       | T             | 28            | 28           | 0             | 0:22.09                         |
| 254       | T             | 28            | 28           | 0             | 0:21.91                         |
| 255       | T             | 28            | 28           | 0             | 0:22.07                         |
| 256       | T             | 28            | 28           | 0             | 0:21.98                         |
| 257       | T             | 28            | 28           | 0             | 0:22.03                         |

| <b>Id</b> | <b>Result</b> | <b>#total</b> | <b>#true</b> | <b>#false</b> | <b>Execution time (min:sec)</b> |
|-----------|---------------|---------------|--------------|---------------|---------------------------------|
| 258       | T             | 28            | 28           | 0             | 0:21.94                         |
| 259       | T             | 28            | 28           | 0             | 0:22.05                         |
| 260       | T             | 28            | 28           | 0             | 0:21.89                         |
| 261       | T             | 28            | 28           | 0             | 0:22.14                         |
| 262       | T             | 28            | 28           | 0             | 0:22.81                         |
| 263       | T             | 28            | 28           | 0             | 0:22.05                         |
| 264       | T             | 28            | 28           | 0             | 0:22.06                         |
| 265       | T             | 28            | 28           | 0             | 0:22.06                         |
| 266       | T             | 28            | 28           | 0             | 0:22.03                         |
| 267       | T             | 28            | 28           | 0             | 0:21.98                         |
| 268       | T             | 28            | 28           | 0             | 0:22.15                         |
| 269       | T             | 28            | 28           | 0             | 0:22.02                         |
| 270       | T             | 28            | 28           | 0             | 0:21.98                         |
| 271       | T             | 28            | 28           | 0             | 0:22.02                         |
| 272       | T             | 28            | 28           | 0             | 0:22.12                         |
| 273       | T             | 28            | 28           | 0             | 0:22.02                         |
| 274       | T             | 28            | 28           | 0             | 0:21.87                         |
| 275       | T             | 28            | 28           | 0             | 0:21.94                         |
| 276       | T             | 28            | 28           | 0             | 0:22.11                         |
| 277       | T             | 28            | 28           | 0             | 0:22.05                         |
| 278       | T             | 28            | 28           | 0             | 0:22.01                         |
| 279       | T             | 28            | 28           | 0             | 0:21.99                         |
| 280       | T             | 28            | 28           | 0             | 0:22.11                         |
| 281       | T             | 28            | 28           | 0             | 0:21.99                         |
| 282       | T             | 28            | 28           | 0             | 0:22.09                         |
| 283       | T             | 28            | 28           | 0             | 0:22.11                         |
| 284       | T             | 28            | 28           | 0             | 0:22.08                         |
| 285       | T             | 28            | 28           | 0             | 0:22.12                         |
| 286       | T             | 28            | 28           | 0             | 0:22.03                         |
| 287       | T             | 28            | 28           | 0             | 0:21.90                         |
| 288       | T             | 28            | 28           | 0             | 0:21.97                         |
| 289       | T             | 28            | 28           | 0             | 0:21.99                         |
| 290       | T             | 28            | 28           | 0             | 0:22.02                         |
| 291       | T             | 28            | 28           | 0             | 0:21.88                         |
| 292       | T             | 28            | 28           | 0             | 0:22.14                         |
| 293       | T             | 28            | 28           | 0             | 0:22.02                         |
| 294       | T             | 28            | 28           | 0             | 0:22.08                         |
| 295       | T             | 28            | 28           | 0             | 0:22.04                         |
| 296       | T             | 28            | 28           | 0             | 0:22.04                         |
| 297       | T             | 28            | 28           | 0             | 0:22.06                         |
| 298       | T             | 28            | 28           | 0             | 0:22.04                         |
| 299       | T             | 28            | 28           | 0             | 0:21.95                         |
| 300       | T             | 28            | 28           | 0             | 0:22.05                         |
| 301       | T             | 28            | 28           | 0             | 0:22.04                         |
| 302       | T             | 28            | 28           | 0             | 0:22.16                         |
| 303       | T             | 28            | 28           | 0             | 0:22.00                         |
| 304       | T             | 28            | 28           | 0             | 0:21.99                         |
| 305       | T             | 28            | 28           | 0             | 0:22.08                         |



| <b>Id</b> | <b>Result</b> | <b>#total</b> | <b>#true</b> | <b>#false</b> | <b>Execution time (min:sec)</b> |
|-----------|---------------|---------------|--------------|---------------|---------------------------------|
| 306       | T             | 28            | 28           | 0             | 0:22.02                         |
| 307       | T             | 28            | 28           | 0             | 0:21.96                         |
| 308       | T             | 28            | 28           | 0             | 0:22.05                         |
| 309       | T             | 28            | 28           | 0             | 0:22.05                         |
| 310       | T             | 28            | 28           | 0             | 0:22.10                         |
| 311       | T             | 28            | 28           | 0             | 0:22.03                         |
| 312       | T             | 28            | 28           | 0             | 0:22.02                         |
| 313       | T             | 28            | 28           | 0             | 0:22.03                         |
| 314       | T             | 28            | 28           | 0             | 0:22.05                         |
| 315       | T             | 28            | 28           | 0             | 0:22.04                         |
| 316       | T             | 28            | 28           | 0             | 0:22.06                         |
| 317       | T             | 28            | 28           | 0             | 0:21.98                         |
| 318       | T             | 28            | 28           | 0             | 0:21.97                         |
| 319       | T             | 28            | 28           | 0             | 0:21.96                         |
| 320       | T             | 28            | 28           | 0             | 0:22.00                         |
| 321       | T             | 28            | 28           | 0             | 0:21.91                         |
| 322       | T             | 28            | 28           | 0             | 0:21.95                         |
| 323       | T             | 28            | 28           | 0             | 0:22.02                         |
| 324       | T             | 28            | 28           | 0             | 0:22.09                         |
| 325       | T             | 28            | 28           | 0             | 0:22.00                         |
| 326       | T             | 28            | 28           | 0             | 0:22.26                         |
| 327       | T             | 28            | 28           | 0             | 0:21.92                         |
| 328       | T             | 28            | 28           | 0             | 0:21.99                         |
| 329       | T             | 28            | 28           | 0             | 0:22.01                         |
| 330       | T             | 28            | 28           | 0             | 0:22.11                         |
| 331       | T             | 28            | 28           | 0             | 0:22.07                         |
| 332       | T             | 28            | 28           | 0             | 0:21.99                         |
| 333       | T             | 28            | 28           | 0             | 0:22.00                         |
| 334       | T             | 28            | 28           | 0             | 0:22.12                         |
| 335       | T             | 28            | 28           | 0             | 0:22.11                         |
| 336       | T             | 28            | 28           | 0             | 0:22.10                         |
| 337       | T             | 28            | 28           | 0             | 0:22.04                         |
| 338       | T             | 28            | 28           | 0             | 0:22.06                         |
| 339       | T             | 28            | 28           | 0             | 0:22.04                         |
| 340       | T             | 28            | 28           | 0             | 0:22.04                         |
| 341       | T             | 28            | 28           | 0             | 0:22.02                         |
| 342       | T             | 28            | 28           | 0             | 0:21.96                         |
| 343       | T             | 28            | 28           | 0             | 0:22.02                         |
| 344       | T             | 28            | 28           | 0             | 0:22.15                         |
| 345       | T             | 28            | 28           | 0             | 0:22.10                         |
| 346       | T             | 28            | 28           | 0             | 0:21.99                         |
| 347       | T             | 28            | 28           | 0             | 0:22.09                         |
| 348       | T             | 28            | 28           | 0             | 0:22.06                         |
| 349       | T             | 28            | 28           | 0             | 0:22.07                         |
| 350       | T             | 28            | 28           | 0             | 0:21.93                         |
| 351       | T             | 28            | 28           | 0             | 0:21.93                         |
| 352       | T             | 28            | 28           | 0             | 0:22.05                         |
| 353       | T             | 28            | 28           | 0             | 0:21.96                         |

| <b>Id</b> | <b>Result</b> | <b>#total</b> | <b>#true</b> | <b>#false</b> | <b>Execution time (min:sec)</b> |
|-----------|---------------|---------------|--------------|---------------|---------------------------------|
| 354       | T             | 28            | 28           | 0             | 0:22.14                         |
| 355       | T             | 28            | 28           | 0             | 0:22.04                         |
| 356       | T             | 28            | 28           | 0             | 0:21.99                         |
| 357       | T             | 28            | 28           | 0             | 0:21.99                         |
| 358       | T             | 28            | 28           | 0             | 0:22.05                         |
| 359       | T             | 28            | 28           | 0             | 0:22.11                         |
| 360       | T             | 28            | 28           | 0             | 0:22.02                         |
| 361       | T             | 28            | 28           | 0             | 0:22.02                         |
| 362       | T             | 28            | 28           | 0             | 0:22.04                         |
| 363       | T             | 28            | 28           | 0             | 0:22.06                         |
| 364       | T             | 28            | 28           | 0             | 0:22.01                         |
| 365       | T             | 28            | 28           | 0             | 0:21.98                         |
| 366       | T             | 28            | 28           | 0             | 0:21.92                         |
| 367       | T             | 28            | 28           | 0             | 0:22.18                         |
| 368       | T             | 28            | 28           | 0             | 0:21.93                         |
| 369       | T             | 28            | 28           | 0             | 0:22.02                         |
| 370       | T             | 28            | 28           | 0             | 0:21.99                         |
| 371       | T             | 28            | 28           | 0             | 0:22.13                         |
| 372       | T             | 28            | 28           | 0             | 0:22.19                         |
| 373       | T             | 28            | 28           | 0             | 0:22.19                         |
| 374       | T             | 28            | 28           | 0             | 0:22.01                         |
| 375       | T             | 28            | 28           | 0             | 0:22.11                         |
| 376       | T             | 28            | 28           | 0             | 0:22.11                         |
| 377       | T             | 28            | 28           | 0             | 0:22.18                         |
| 378       | T             | 28            | 28           | 0             | 0:21.98                         |
| 379       | T             | 28            | 28           | 0             | 0:22.05                         |
| 380       | T             | 28            | 28           | 0             | 0:22.15                         |
| 381       | T             | 28            | 28           | 0             | 0:22.06                         |
| 382       | T             | 28            | 28           | 0             | 0:21.88                         |
| 383       | T             | 28            | 28           | 0             | 0:22.03                         |
| 384       | T             | 28            | 28           | 0             | 0:22.11                         |
| 385       | T             | 28            | 28           | 0             | 0:22.11                         |
| 386       | T             | 28            | 28           | 0             | 0:22.06                         |
| 387       | T             | 28            | 28           | 0             | 0:22.09                         |
| 388       | T             | 28            | 28           | 0             | 0:21.99                         |
| 389       | T             | 28            | 28           | 0             | 0:21.92                         |
| 390       | T             | 28            | 28           | 0             | 0:21.99                         |
| 391       | T             | 28            | 28           | 0             | 0:22.08                         |
| 392       | T             | 28            | 28           | 0             | 0:22.12                         |
| 393       | T             | 28            | 28           | 0             | 0:21.98                         |
| 394       | T             | 28            | 28           | 0             | 0:21.88                         |
| 395       | T             | 28            | 28           | 0             | 0:22.17                         |
| 396       | T             | 28            | 28           | 0             | 0:22.03                         |
| 397       | T             | 28            | 28           | 0             | 0:22.07                         |
| 398       | T             | 28            | 28           | 0             | 0:22.04                         |
| 399       | T             | 28            | 28           | 0             | 0:22.03                         |
| 400       | T             | 28            | 28           | 0             | 0:21.99                         |
| 401       | T             | 28            | 28           | 0             | 0:22.04                         |

| <b>Id</b> | <b>Result</b> | <b>#total</b> | <b>#true</b> | <b>#false</b> | <b>Execution time (min:sec)</b> |
|-----------|---------------|---------------|--------------|---------------|---------------------------------|
| 402       | T             | 28            | 28           | 0             | 0:22.05                         |
| 403       | T             | 28            | 28           | 0             | 0:21.92                         |
| 404       | T             | 28            | 28           | 0             | 0:21.97                         |
| 405       | T             | 28            | 28           | 0             | 0:21.99                         |
| 406       | T             | 28            | 28           | 0             | 0:23.09                         |
| 407       | T             | 28            | 28           | 0             | 0:22.02                         |
| 408       | T             | 28            | 28           | 0             | 0:21.99                         |
| 409       | T             | 28            | 28           | 0             | 0:21.94                         |
| 410       | T             | 28            | 28           | 0             | 0:21.95                         |
| 411       | T             | 28            | 28           | 0             | 0:22.13                         |
| 412       | T             | 28            | 28           | 0             | 0:22.14                         |
| 413       | T             | 28            | 28           | 0             | 0:22.13                         |
| 414       | T             | 28            | 28           | 0             | 0:21.91                         |
| 415       | T             | 28            | 28           | 0             | 0:22.12                         |
| 416       | T             | 28            | 28           | 0             | 0:21.94                         |
| 417       | T             | 28            | 28           | 0             | 0:21.91                         |
| 418       | T             | 28            | 28           | 0             | 0:22.04                         |
| 419       | T             | 28            | 28           | 0             | 0:21.98                         |
| 420       | T             | 28            | 28           | 0             | 0:22.00                         |
| 421       | T             | 28            | 28           | 0             | 0:21.95                         |
| 422       | T             | 28            | 28           | 0             | 0:22.01                         |
| 423       | T             | 28            | 28           | 0             | 0:21.95                         |
| 424       | T             | 28            | 28           | 0             | 0:22.07                         |
| 425       | T             | 28            | 28           | 0             | 0:22.03                         |
| 426       | T             | 28            | 28           | 0             | 0:21.87                         |
| 427       | T             | 28            | 28           | 0             | 0:21.99                         |
| 428       | T             | 28            | 28           | 0             | 0:22.02                         |
| 429       | T             | 28            | 28           | 0             | 0:21.91                         |
| 430       | T             | 28            | 28           | 0             | 0:21.98                         |
| 431       | T             | 28            | 28           | 0             | 0:22.04                         |
| 432       | T             | 28            | 28           | 0             | 0:21.91                         |
| 433       | T             | 28            | 28           | 0             | 0:22.04                         |
| 434       | T             | 28            | 28           | 0             | 0:22.09                         |
| 435       | T             | 28            | 28           | 0             | 0:22.02                         |
| 436       | T             | 28            | 28           | 0             | 0:22.11                         |
| 437       | T             | 28            | 28           | 0             | 0:21.97                         |
| 438       | T             | 28            | 28           | 0             | 0:21.91                         |
| 439       | T             | 28            | 28           | 0             | 0:22.00                         |
| 440       | T             | 28            | 28           | 0             | 0:22.04                         |
| 441       | T             | 28            | 28           | 0             | 0:22.15                         |
| 442       | T             | 28            | 28           | 0             | 0:21.92                         |
| 443       | T             | 28            | 28           | 0             | 0:22.03                         |
| 444       | T             | 28            | 28           | 0             | 0:22.10                         |
| 445       | T             | 28            | 28           | 0             | 0:22.06                         |
| 446       | T             | 28            | 28           | 0             | 0:21.97                         |
| 447       | T             | 28            | 28           | 0             | 0:21.95                         |
| 448       | T             | 28            | 28           | 0             | 0:22.02                         |
| 449       | T             | 28            | 28           | 0             | 0:21.84                         |

| <b>Id</b> | <b>Result</b> | <b>#total</b> | <b>#true</b> | <b>#false</b> | <b>Execution time (min:sec)</b> |
|-----------|---------------|---------------|--------------|---------------|---------------------------------|
| 450       | T             | 28            | 28           | 0             | 0:22.04                         |
| 451       | T             | 28            | 28           | 0             | 0:22.03                         |
| 452       | T             | 28            | 28           | 0             | 0:22.06                         |
| 453       | T             | 28            | 28           | 0             | 0:21.94                         |
| 454       | T             | 28            | 28           | 0             | 0:22.08                         |
| 455       | T             | 28            | 28           | 0             | 0:22.02                         |
| 456       | T             | 28            | 28           | 0             | 0:21.99                         |
| 457       | T             | 28            | 28           | 0             | 0:21.90                         |
| 458       | T             | 28            | 28           | 0             | 0:21.99                         |
| 459       | T             | 28            | 28           | 0             | 0:22.00                         |
| 460       | T             | 28            | 28           | 0             | 0:22.17                         |
| 461       | T             | 28            | 28           | 0             | 0:21.94                         |
| 462       | T             | 28            | 28           | 0             | 0:22.08                         |
| 463       | T             | 28            | 28           | 0             | 0:22.09                         |
| 464       | T             | 28            | 28           | 0             | 0:22.03                         |
| 465       | T             | 28            | 28           | 0             | 0:22.15                         |
| 466       | T             | 28            | 28           | 0             | 0:22.03                         |
| 467       | T             | 28            | 28           | 0             | 0:21.93                         |
| 468       | T             | 28            | 28           | 0             | 0:22.00                         |
| 469       | T             | 28            | 28           | 0             | 0:21.89                         |
| 470       | T             | 28            | 28           | 0             | 0:21.98                         |
| 471       | T             | 28            | 28           | 0             | 0:22.14                         |
| 472       | T             | 28            | 28           | 0             | 0:22.10                         |
| 473       | T             | 28            | 28           | 0             | 0:22.02                         |
| 474       | T             | 28            | 28           | 0             | 0:22.11                         |
| 475       | T             | 28            | 28           | 0             | 0:22.02                         |
| 476       | T             | 28            | 28           | 0             | 0:22.05                         |
| 477       | T             | 28            | 28           | 0             | 0:22.02                         |
| 478       | T             | 28            | 28           | 0             | 0:22.12                         |
| 479       | T             | 28            | 28           | 0             | 0:22.05                         |
| 480       | T             | 28            | 28           | 0             | 0:22.02                         |
| 481       | T             | 28            | 28           | 0             | 0:22.13                         |
| 482       | T             | 28            | 28           | 0             | 0:22.00                         |
| 483       | T             | 28            | 28           | 0             | 0:22.09                         |
| 484       | T             | 28            | 28           | 0             | 0:21.99                         |
| 485       | T             | 28            | 28           | 0             | 0:22.00                         |
| 486       | T             | 28            | 28           | 0             | 0:21.96                         |
| 487       | T             | 28            | 28           | 0             | 0:22.20                         |
| 488       | T             | 28            | 28           | 0             | 0:22.10                         |
| 489       | T             | 28            | 28           | 0             | 0:22.06                         |
| 490       | T             | 28            | 28           | 0             | 0:22.12                         |
| 491       | T             | 28            | 28           | 0             | 0:22.09                         |
| 492       | T             | 28            | 28           | 0             | 0:22.05                         |
| 493       | T             | 28            | 28           | 0             | 0:22.18                         |
| 494       | T             | 28            | 28           | 0             | 0:21.91                         |
| 495       | T             | 28            | 28           | 0             | 0:21.98                         |
| 496       | T             | 28            | 28           | 0             | 0:21.97                         |
| 497       | T             | 28            | 28           | 0             | 0:22.09                         |

| <b>Id</b> | <b>Result</b> | <b>#total</b> | <b>#true</b> | <b>#false</b> | <b>Execution time (min:sec)</b> |
|-----------|---------------|---------------|--------------|---------------|---------------------------------|
| 498       | T             | 28            | 28           | 0             | 0:22.04                         |
| 499       | T             | 28            | 28           | 0             | 0:22.00                         |
| 500       | T             | 28            | 28           | 0             | 0:22.02                         |

Table 2: Model checking results corresponding to logic property 10

| <b>Id</b> | <b>Result</b> | <b>#total</b> | <b>#true</b> | <b>#false</b> | <b>Execution time (min:sec)</b> |
|-----------|---------------|---------------|--------------|---------------|---------------------------------|
| 1         | T             | 14            | 14           | 0             | 0:11.53                         |
| 2         | T             | 14            | 14           | 0             | 0:11.57                         |
| 3         | T             | 14            | 14           | 0             | 0:11.42                         |
| 4         | T             | 14            | 14           | 0             | 0:11.46                         |
| 5         | T             | 14            | 14           | 0             | 0:11.41                         |
| 6         | T             | 14            | 14           | 0             | 0:11.49                         |
| 7         | T             | 14            | 14           | 0             | 0:11.38                         |
| 8         | T             | 14            | 14           | 0             | 0:11.40                         |
| 9         | T             | 14            | 14           | 0             | 0:11.53                         |
| 10        | T             | 14            | 14           | 0             | 0:11.55                         |
| 11        | T             | 14            | 14           | 0             | 0:11.46                         |
| 12        | T             | 14            | 14           | 0             | 0:11.47                         |
| 13        | T             | 14            | 14           | 0             | 0:11.54                         |
| 14        | T             | 14            | 14           | 0             | 0:11.55                         |
| 15        | T             | 14            | 14           | 0             | 0:11.50                         |
| 16        | T             | 14            | 14           | 0             | 0:11.48                         |
| 17        | T             | 14            | 14           | 0             | 0:11.54                         |
| 18        | T             | 14            | 14           | 0             | 0:11.48                         |
| 19        | T             | 14            | 14           | 0             | 0:11.47                         |
| 20        | T             | 14            | 14           | 0             | 0:11.41                         |
| 21        | T             | 14            | 14           | 0             | 0:11.48                         |
| 22        | T             | 14            | 14           | 0             | 0:11.56                         |
| 23        | T             | 14            | 14           | 0             | 0:11.51                         |
| 24        | T             | 14            | 14           | 0             | 0:11.41                         |
| 25        | T             | 14            | 14           | 0             | 0:11.51                         |
| 26        | T             | 14            | 14           | 0             | 0:11.49                         |
| 27        | T             | 14            | 14           | 0             | 0:11.47                         |
| 28        | T             | 14            | 14           | 0             | 0:11.49                         |
| 29        | T             | 14            | 14           | 0             | 0:11.53                         |
| 30        | T             | 14            | 14           | 0             | 0:11.43                         |
| 31        | T             | 14            | 14           | 0             | 0:11.45                         |
| 32        | T             | 14            | 14           | 0             | 0:11.46                         |
| 33        | T             | 14            | 14           | 0             | 0:11.47                         |
| 34        | T             | 14            | 14           | 0             | 0:11.56                         |
| 35        | T             | 14            | 14           | 0             | 0:11.52                         |
| 36        | T             | 14            | 14           | 0             | 0:11.51                         |
| 37        | T             | 14            | 14           | 0             | 0:11.50                         |
| 38        | T             | 14            | 14           | 0             | 0:11.55                         |

| <b>Id</b> | <b>Result</b> | <b>#total</b> | <b>#true</b> | <b>#false</b> | <b>Execution time (min:sec)</b> |
|-----------|---------------|---------------|--------------|---------------|---------------------------------|
| 39        | T             | 14            | 14           | 0             | 0:11.59                         |
| 40        | T             | 14            | 14           | 0             | 0:11.47                         |
| 41        | T             | 14            | 14           | 0             | 0:11.46                         |
| 42        | T             | 14            | 14           | 0             | 0:11.47                         |
| 43        | T             | 14            | 14           | 0             | 0:11.47                         |
| 44        | T             | 14            | 14           | 0             | 0:11.45                         |
| 45        | T             | 14            | 14           | 0             | 0:11.48                         |
| 46        | T             | 14            | 14           | 0             | 0:11.44                         |
| 47        | T             | 14            | 14           | 0             | 0:11.60                         |
| 48        | T             | 14            | 14           | 0             | 0:11.57                         |
| 49        | T             | 14            | 14           | 0             | 0:11.53                         |
| 50        | T             | 14            | 14           | 0             | 0:11.43                         |
| 51        | T             | 14            | 14           | 0             | 0:11.38                         |
| 52        | T             | 14            | 14           | 0             | 0:11.47                         |
| 53        | T             | 14            | 14           | 0             | 0:11.44                         |
| 54        | T             | 14            | 14           | 0             | 0:11.45                         |
| 55        | T             | 14            | 14           | 0             | 0:11.51                         |
| 56        | T             | 14            | 14           | 0             | 0:11.43                         |
| 57        | T             | 14            | 14           | 0             | 0:11.42                         |
| 58        | T             | 14            | 14           | 0             | 0:11.49                         |
| 59        | T             | 14            | 14           | 0             | 0:11.47                         |
| 60        | T             | 14            | 14           | 0             | 0:11.47                         |
| 61        | T             | 14            | 14           | 0             | 0:11.45                         |
| 62        | T             | 14            | 14           | 0             | 0:11.43                         |
| 63        | T             | 14            | 14           | 0             | 0:11.49                         |
| 64        | T             | 14            | 14           | 0             | 0:11.43                         |
| 65        | T             | 14            | 14           | 0             | 0:11.47                         |
| 66        | T             | 14            | 14           | 0             | 0:11.37                         |
| 67        | T             | 14            | 14           | 0             | 0:11.45                         |
| 68        | T             | 14            | 14           | 0             | 0:11.45                         |
| 69        | T             | 14            | 14           | 0             | 0:11.46                         |
| 70        | T             | 14            | 14           | 0             | 0:11.49                         |
| 71        | T             | 14            | 14           | 0             | 0:11.52                         |
| 72        | T             | 14            | 14           | 0             | 0:11.48                         |
| 73        | T             | 14            | 14           | 0             | 0:11.44                         |
| 74        | T             | 14            | 14           | 0             | 0:11.42                         |
| 75        | T             | 14            | 14           | 0             | 0:11.51                         |
| 76        | T             | 14            | 14           | 0             | 0:11.47                         |
| 77        | T             | 14            | 14           | 0             | 0:11.52                         |
| 78        | T             | 14            | 14           | 0             | 0:11.48                         |
| 79        | T             | 14            | 14           | 0             | 0:11.45                         |
| 80        | T             | 14            | 14           | 0             | 0:11.50                         |
| 81        | T             | 14            | 14           | 0             | 0:11.46                         |
| 82        | T             | 14            | 14           | 0             | 0:11.48                         |
| 83        | T             | 14            | 14           | 0             | 0:11.48                         |
| 84        | T             | 14            | 14           | 0             | 0:11.47                         |
| 85        | T             | 14            | 14           | 0             | 0:11.47                         |
| 86        | T             | 14            | 14           | 0             | 0:11.51                         |

| <b>Id</b> | <b>Result</b> | <b>#total</b> | <b>#true</b> | <b>#false</b> | <b>Execution time (min:sec)</b> |
|-----------|---------------|---------------|--------------|---------------|---------------------------------|
| 87        | T             | 14            | 14           | 0             | 0:11.45                         |
| 88        | T             | 14            | 14           | 0             | 0:11.44                         |
| 89        | T             | 14            | 14           | 0             | 0:11.46                         |
| 90        | T             | 14            | 14           | 0             | 0:11.50                         |
| 91        | T             | 14            | 14           | 0             | 0:11.38                         |
| 92        | T             | 14            | 14           | 0             | 0:11.51                         |
| 93        | T             | 14            | 14           | 0             | 0:11.45                         |
| 94        | T             | 14            | 14           | 0             | 0:11.45                         |
| 95        | T             | 14            | 14           | 0             | 0:11.46                         |
| 96        | T             | 14            | 14           | 0             | 0:11.55                         |
| 97        | T             | 14            | 14           | 0             | 0:11.47                         |
| 98        | T             | 14            | 14           | 0             | 0:11.51                         |
| 99        | T             | 14            | 14           | 0             | 0:11.43                         |
| 100       | T             | 14            | 14           | 0             | 0:11.53                         |
| 101       | T             | 14            | 14           | 0             | 0:11.44                         |
| 102       | T             | 14            | 14           | 0             | 0:11.44                         |
| 103       | T             | 14            | 14           | 0             | 0:11.44                         |
| 104       | T             | 14            | 14           | 0             | 0:11.50                         |
| 105       | T             | 14            | 14           | 0             | 0:11.55                         |
| 106       | T             | 14            | 14           | 0             | 0:12.33                         |
| 107       | T             | 14            | 14           | 0             | 0:11.54                         |
| 108       | T             | 14            | 14           | 0             | 0:11.56                         |
| 109       | T             | 14            | 14           | 0             | 0:11.47                         |
| 110       | T             | 14            | 14           | 0             | 0:11.44                         |
| 111       | T             | 14            | 14           | 0             | 0:11.50                         |
| 112       | T             | 14            | 14           | 0             | 0:11.56                         |
| 113       | T             | 14            | 14           | 0             | 0:11.43                         |
| 114       | T             | 14            | 14           | 0             | 0:11.49                         |
| 115       | T             | 14            | 14           | 0             | 0:11.45                         |
| 116       | T             | 14            | 14           | 0             | 0:11.45                         |
| 117       | T             | 14            | 14           | 0             | 0:11.57                         |
| 118       | T             | 14            | 14           | 0             | 0:11.45                         |
| 119       | T             | 14            | 14           | 0             | 0:11.43                         |
| 120       | T             | 14            | 14           | 0             | 0:11.53                         |
| 121       | T             | 14            | 14           | 0             | 0:11.44                         |
| 122       | T             | 14            | 14           | 0             | 0:11.43                         |
| 123       | T             | 14            | 14           | 0             | 0:11.50                         |
| 124       | T             | 14            | 14           | 0             | 0:11.51                         |
| 125       | T             | 14            | 14           | 0             | 0:11.47                         |
| 126       | T             | 14            | 14           | 0             | 0:11.56                         |
| 127       | T             | 14            | 14           | 0             | 0:11.51                         |
| 128       | T             | 14            | 14           | 0             | 0:11.43                         |
| 129       | T             | 14            | 14           | 0             | 0:11.51                         |
| 130       | T             | 14            | 14           | 0             | 0:11.47                         |
| 131       | T             | 14            | 14           | 0             | 0:11.47                         |
| 132       | T             | 14            | 14           | 0             | 0:11.42                         |
| 133       | T             | 14            | 14           | 0             | 0:11.44                         |
| 134       | T             | 14            | 14           | 0             | 0:11.49                         |

| <b>Id</b> | <b>Result</b> | <b>#total</b> | <b>#true</b> | <b>#false</b> | <b>Execution time (min:sec)</b> |
|-----------|---------------|---------------|--------------|---------------|---------------------------------|
| 135       | T             | 14            | 14           | 0             | 0:11.41                         |
| 136       | T             | 14            | 14           | 0             | 0:11.55                         |
| 137       | T             | 14            | 14           | 0             | 0:11.43                         |
| 138       | T             | 14            | 14           | 0             | 0:11.52                         |
| 139       | T             | 14            | 14           | 0             | 0:11.42                         |
| 140       | T             | 14            | 14           | 0             | 0:11.51                         |
| 141       | T             | 14            | 14           | 0             | 0:11.53                         |
| 142       | T             | 14            | 14           | 0             | 0:11.46                         |
| 143       | T             | 14            | 14           | 0             | 0:11.51                         |
| 144       | T             | 14            | 14           | 0             | 0:11.44                         |
| 145       | T             | 14            | 14           | 0             | 0:11.53                         |
| 146       | T             | 14            | 14           | 0             | 0:11.49                         |
| 147       | T             | 14            | 14           | 0             | 0:11.45                         |
| 148       | T             | 14            | 14           | 0             | 0:12.37                         |
| 149       | T             | 14            | 14           | 0             | 0:11.47                         |
| 150       | T             | 14            | 14           | 0             | 0:11.50                         |
| 151       | T             | 14            | 14           | 0             | 0:11.52                         |
| 152       | T             | 14            | 14           | 0             | 0:11.50                         |
| 153       | T             | 14            | 14           | 0             | 0:11.42                         |
| 154       | T             | 14            | 14           | 0             | 0:11.48                         |
| 155       | T             | 14            | 14           | 0             | 0:11.42                         |
| 156       | T             | 14            | 14           | 0             | 0:11.50                         |
| 157       | T             | 14            | 14           | 0             | 0:11.47                         |
| 158       | T             | 14            | 14           | 0             | 0:11.69                         |
| 159       | T             | 14            | 14           | 0             | 0:11.61                         |
| 160       | T             | 14            | 14           | 0             | 0:11.51                         |
| 161       | T             | 14            | 14           | 0             | 0:11.48                         |
| 162       | T             | 14            | 14           | 0             | 0:11.53                         |
| 163       | T             | 14            | 14           | 0             | 0:11.49                         |
| 164       | T             | 14            | 14           | 0             | 0:11.46                         |
| 165       | T             | 14            | 14           | 0             | 0:11.51                         |
| 166       | T             | 14            | 14           | 0             | 0:11.53                         |
| 167       | T             | 14            | 14           | 0             | 0:11.49                         |
| 168       | T             | 14            | 14           | 0             | 0:11.50                         |
| 169       | T             | 14            | 14           | 0             | 0:11.50                         |
| 170       | T             | 14            | 14           | 0             | 0:11.55                         |
| 171       | T             | 14            | 14           | 0             | 0:11.45                         |
| 172       | T             | 14            | 14           | 0             | 0:11.50                         |
| 173       | T             | 14            | 14           | 0             | 0:11.49                         |
| 174       | T             | 14            | 14           | 0             | 0:11.50                         |
| 175       | T             | 14            | 14           | 0             | 0:11.59                         |
| 176       | T             | 14            | 14           | 0             | 0:11.51                         |
| 177       | T             | 14            | 14           | 0             | 0:11.51                         |
| 178       | T             | 14            | 14           | 0             | 0:11.47                         |
| 179       | T             | 14            | 14           | 0             | 0:11.53                         |
| 180       | T             | 14            | 14           | 0             | 0:11.51                         |
| 181       | T             | 14            | 14           | 0             | 0:11.43                         |
| 182       | T             | 14            | 14           | 0             | 0:11.43                         |



| <b>Id</b> | <b>Result</b> | <b>#total</b> | <b>#true</b> | <b>#false</b> | <b>Execution time (min:sec)</b> |
|-----------|---------------|---------------|--------------|---------------|---------------------------------|
| 183       | T             | 14            | 14           | 0             | 0:11.44                         |
| 184       | T             | 14            | 14           | 0             | 0:11.53                         |
| 185       | T             | 14            | 14           | 0             | 0:11.55                         |
| 186       | T             | 14            | 14           | 0             | 0:11.52                         |
| 187       | T             | 14            | 14           | 0             | 0:11.50                         |
| 188       | T             | 14            | 14           | 0             | 0:11.51                         |
| 189       | T             | 14            | 14           | 0             | 0:11.51                         |
| 190       | T             | 14            | 14           | 0             | 0:11.53                         |
| 191       | T             | 14            | 14           | 0             | 0:11.45                         |
| 192       | T             | 14            | 14           | 0             | 0:11.56                         |
| 193       | T             | 14            | 14           | 0             | 0:11.51                         |
| 194       | T             | 14            | 14           | 0             | 0:11.51                         |
| 195       | T             | 14            | 14           | 0             | 0:11.52                         |
| 196       | T             | 14            | 14           | 0             | 0:11.52                         |
| 197       | T             | 14            | 14           | 0             | 0:11.60                         |
| 198       | T             | 14            | 14           | 0             | 0:11.47                         |
| 199       | T             | 14            | 14           | 0             | 0:11.49                         |
| 200       | T             | 14            | 14           | 0             | 0:11.52                         |
| 201       | T             | 14            | 14           | 0             | 0:11.46                         |
| 202       | T             | 14            | 14           | 0             | 0:11.44                         |
| 203       | T             | 14            | 14           | 0             | 0:11.51                         |
| 204       | T             | 14            | 14           | 0             | 0:11.55                         |
| 205       | T             | 14            | 14           | 0             | 0:11.56                         |
| 206       | T             | 14            | 14           | 0             | 0:11.61                         |
| 207       | T             | 14            | 14           | 0             | 0:11.46                         |
| 208       | T             | 14            | 14           | 0             | 0:11.54                         |
| 209       | T             | 14            | 14           | 0             | 0:11.64                         |
| 210       | T             | 14            | 14           | 0             | 0:11.48                         |
| 211       | T             | 14            | 14           | 0             | 0:11.50                         |
| 212       | T             | 14            | 14           | 0             | 0:11.48                         |
| 213       | T             | 14            | 14           | 0             | 0:11.48                         |
| 214       | T             | 14            | 14           | 0             | 0:11.53                         |
| 215       | T             | 14            | 14           | 0             | 0:11.50                         |
| 216       | T             | 14            | 14           | 0             | 0:11.53                         |
| 217       | T             | 14            | 14           | 0             | 0:11.49                         |
| 218       | T             | 14            | 14           | 0             | 0:11.45                         |
| 219       | T             | 14            | 14           | 0             | 0:11.53                         |
| 220       | T             | 14            | 14           | 0             | 0:11.55                         |
| 221       | T             | 14            | 14           | 0             | 0:11.55                         |
| 222       | T             | 14            | 14           | 0             | 0:11.56                         |
| 223       | T             | 14            | 14           | 0             | 0:11.51                         |
| 224       | T             | 14            | 14           | 0             | 0:11.48                         |
| 225       | T             | 14            | 14           | 0             | 0:11.50                         |
| 226       | T             | 14            | 14           | 0             | 0:11.56                         |
| 227       | T             | 14            | 14           | 0             | 0:11.53                         |
| 228       | T             | 14            | 14           | 0             | 0:11.51                         |
| 229       | T             | 14            | 14           | 0             | 0:11.44                         |
| 230       | T             | 14            | 14           | 0             | 0:11.47                         |

| <b>Id</b> | <b>Result</b> | <b>#total</b> | <b>#true</b> | <b>#false</b> | <b>Execution time (min:sec)</b> |
|-----------|---------------|---------------|--------------|---------------|---------------------------------|
| 231       | T             | 14            | 14           | 0             | 0:11.50                         |
| 232       | T             | 14            | 14           | 0             | 0:11.49                         |
| 233       | T             | 14            | 14           | 0             | 0:11.49                         |
| 234       | T             | 14            | 14           | 0             | 0:11.48                         |
| 235       | T             | 14            | 14           | 0             | 0:11.49                         |
| 236       | T             | 14            | 14           | 0             | 0:11.44                         |
| 237       | T             | 14            | 14           | 0             | 0:11.56                         |
| 238       | T             | 14            | 14           | 0             | 0:11.52                         |
| 239       | T             | 14            | 14           | 0             | 0:11.55                         |
| 240       | T             | 14            | 14           | 0             | 0:11.47                         |
| 241       | T             | 14            | 14           | 0             | 0:11.55                         |
| 242       | T             | 14            | 14           | 0             | 0:11.50                         |
| 243       | T             | 14            | 14           | 0             | 0:11.43                         |
| 244       | T             | 14            | 14           | 0             | 0:11.52                         |
| 245       | T             | 14            | 14           | 0             | 0:11.45                         |
| 246       | T             | 14            | 14           | 0             | 0:11.52                         |
| 247       | T             | 14            | 14           | 0             | 0:11.51                         |
| 248       | T             | 14            | 14           | 0             | 0:11.55                         |
| 249       | T             | 14            | 14           | 0             | 0:11.46                         |
| 250       | T             | 14            | 14           | 0             | 0:11.48                         |
| 251       | T             | 14            | 14           | 0             | 0:11.53                         |
| 252       | T             | 14            | 14           | 0             | 0:11.47                         |
| 253       | T             | 14            | 14           | 0             | 0:11.59                         |
| 254       | T             | 14            | 14           | 0             | 0:11.49                         |
| 255       | T             | 14            | 14           | 0             | 0:11.53                         |
| 256       | T             | 14            | 14           | 0             | 0:11.44                         |
| 257       | T             | 14            | 14           | 0             | 0:11.53                         |
| 258       | T             | 14            | 14           | 0             | 0:11.50                         |
| 259       | T             | 14            | 14           | 0             | 0:11.48                         |
| 260       | T             | 14            | 14           | 0             | 0:11.53                         |
| 261       | T             | 14            | 14           | 0             | 0:11.50                         |
| 262       | T             | 14            | 14           | 0             | 0:11.48                         |
| 263       | T             | 14            | 14           | 0             | 0:11.51                         |
| 264       | T             | 14            | 14           | 0             | 0:11.51                         |
| 265       | T             | 14            | 14           | 0             | 0:11.48                         |
| 266       | T             | 14            | 14           | 0             | 0:11.41                         |
| 267       | T             | 14            | 14           | 0             | 0:11.45                         |
| 268       | T             | 14            | 14           | 0             | 0:11.48                         |
| 269       | T             | 14            | 14           | 0             | 0:11.49                         |
| 270       | T             | 14            | 14           | 0             | 0:11.52                         |
| 271       | T             | 14            | 14           | 0             | 0:11.48                         |
| 272       | T             | 14            | 14           | 0             | 0:11.54                         |
| 273       | T             | 14            | 14           | 0             | 0:11.61                         |
| 274       | T             | 14            | 14           | 0             | 0:11.58                         |
| 275       | T             | 14            | 14           | 0             | 0:11.48                         |
| 276       | T             | 14            | 14           | 0             | 0:11.51                         |
| 277       | T             | 14            | 14           | 0             | 0:11.51                         |
| 278       | T             | 14            | 14           | 0             | 0:11.54                         |

| <b>Id</b> | <b>Result</b> | <b>#total</b> | <b>#true</b> | <b>#false</b> | <b>Execution time (min:sec)</b> |
|-----------|---------------|---------------|--------------|---------------|---------------------------------|
| 279       | T             | 14            | 14           | 0             | 0:11.52                         |
| 280       | T             | 14            | 14           | 0             | 0:11.51                         |
| 281       | T             | 14            | 14           | 0             | 0:11.54                         |
| 282       | T             | 14            | 14           | 0             | 0:11.52                         |
| 283       | T             | 14            | 14           | 0             | 0:11.53                         |
| 284       | T             | 14            | 14           | 0             | 0:11.58                         |
| 285       | T             | 14            | 14           | 0             | 0:11.56                         |
| 286       | T             | 14            | 14           | 0             | 0:11.50                         |
| 287       | T             | 14            | 14           | 0             | 0:11.51                         |
| 288       | T             | 14            | 14           | 0             | 0:11.43                         |
| 289       | T             | 14            | 14           | 0             | 0:11.57                         |
| 290       | T             | 14            | 14           | 0             | 0:11.50                         |
| 291       | T             | 14            | 14           | 0             | 0:11.56                         |
| 292       | T             | 14            | 14           | 0             | 0:11.45                         |
| 293       | T             | 14            | 14           | 0             | 0:11.67                         |
| 294       | T             | 14            | 14           | 0             | 0:11.58                         |
| 295       | T             | 14            | 14           | 0             | 0:11.54                         |
| 296       | T             | 14            | 14           | 0             | 0:11.47                         |
| 297       | T             | 14            | 14           | 0             | 0:11.50                         |
| 298       | T             | 14            | 14           | 0             | 0:11.61                         |
| 299       | T             | 14            | 14           | 0             | 0:11.45                         |
| 300       | T             | 14            | 14           | 0             | 0:11.46                         |
| 301       | T             | 14            | 14           | 0             | 0:11.48                         |
| 302       | T             | 14            | 14           | 0             | 0:11.50                         |
| 303       | T             | 14            | 14           | 0             | 0:11.50                         |
| 304       | T             | 14            | 14           | 0             | 0:11.54                         |
| 305       | T             | 14            | 14           | 0             | 0:11.55                         |
| 306       | T             | 14            | 14           | 0             | 0:11.51                         |
| 307       | T             | 14            | 14           | 0             | 0:11.50                         |
| 308       | T             | 14            | 14           | 0             | 0:11.53                         |
| 309       | T             | 14            | 14           | 0             | 0:11.47                         |
| 310       | T             | 14            | 14           | 0             | 0:11.55                         |
| 311       | T             | 14            | 14           | 0             | 0:11.44                         |
| 312       | T             | 14            | 14           | 0             | 0:11.57                         |
| 313       | T             | 14            | 14           | 0             | 0:11.47                         |
| 314       | T             | 14            | 14           | 0             | 0:11.51                         |
| 315       | T             | 14            | 14           | 0             | 0:11.52                         |
| 316       | T             | 14            | 14           | 0             | 0:11.51                         |
| 317       | T             | 14            | 14           | 0             | 0:11.50                         |
| 318       | T             | 14            | 14           | 0             | 0:11.55                         |
| 319       | T             | 14            | 14           | 0             | 0:11.45                         |
| 320       | T             | 14            | 14           | 0             | 0:11.53                         |
| 321       | T             | 14            | 14           | 0             | 0:11.57                         |
| 322       | T             | 14            | 14           | 0             | 0:11.48                         |
| 323       | T             | 14            | 14           | 0             | 0:11.47                         |
| 324       | T             | 14            | 14           | 0             | 0:11.48                         |
| 325       | T             | 14            | 14           | 0             | 0:11.52                         |
| 326       | T             | 14            | 14           | 0             | 0:11.54                         |

| <b>Id</b> | <b>Result</b> | <b>#total</b> | <b>#true</b> | <b>#false</b> | <b>Execution time (min:sec)</b> |
|-----------|---------------|---------------|--------------|---------------|---------------------------------|
| 327       | T             | 14            | 14           | 0             | 0:11.46                         |
| 328       | T             | 14            | 14           | 0             | 0:11.52                         |
| 329       | T             | 14            | 14           | 0             | 0:11.53                         |
| 330       | T             | 14            | 14           | 0             | 0:11.51                         |
| 331       | T             | 14            | 14           | 0             | 0:11.53                         |
| 332       | T             | 14            | 14           | 0             | 0:11.54                         |
| 333       | T             | 14            | 14           | 0             | 0:11.45                         |
| 334       | T             | 14            | 14           | 0             | 0:11.54                         |
| 335       | T             | 14            | 14           | 0             | 0:11.52                         |
| 336       | T             | 14            | 14           | 0             | 0:11.59                         |
| 337       | T             | 14            | 14           | 0             | 0:11.59                         |
| 338       | T             | 14            | 14           | 0             | 0:11.46                         |
| 339       | T             | 14            | 14           | 0             | 0:11.46                         |
| 340       | T             | 14            | 14           | 0             | 0:11.53                         |
| 341       | T             | 14            | 14           | 0             | 0:11.57                         |
| 342       | T             | 14            | 14           | 0             | 0:11.52                         |
| 343       | T             | 14            | 14           | 0             | 0:11.48                         |
| 344       | T             | 14            | 14           | 0             | 0:11.45                         |
| 345       | T             | 14            | 14           | 0             | 0:11.45                         |
| 346       | T             | 14            | 14           | 0             | 0:11.54                         |
| 347       | T             | 14            | 14           | 0             | 0:11.53                         |
| 348       | T             | 14            | 14           | 0             | 0:11.42                         |
| 349       | T             | 14            | 14           | 0             | 0:11.49                         |
| 350       | T             | 14            | 14           | 0             | 0:11.57                         |
| 351       | T             | 14            | 14           | 0             | 0:11.44                         |
| 352       | T             | 14            | 14           | 0             | 0:11.54                         |
| 353       | T             | 14            | 14           | 0             | 0:11.50                         |
| 354       | T             | 14            | 14           | 0             | 0:11.47                         |
| 355       | T             | 14            | 14           | 0             | 0:11.54                         |
| 356       | T             | 14            | 14           | 0             | 0:11.49                         |
| 357       | T             | 14            | 14           | 0             | 0:11.51                         |
| 358       | T             | 14            | 14           | 0             | 0:11.46                         |
| 359       | T             | 14            | 14           | 0             | 0:11.56                         |
| 360       | T             | 14            | 14           | 0             | 0:11.53                         |
| 361       | T             | 14            | 14           | 0             | 0:11.54                         |
| 362       | T             | 14            | 14           | 0             | 0:11.49                         |
| 363       | T             | 14            | 14           | 0             | 0:11.45                         |
| 364       | T             | 14            | 14           | 0             | 0:11.49                         |
| 365       | T             | 14            | 14           | 0             | 0:11.49                         |
| 366       | T             | 14            | 14           | 0             | 0:11.46                         |
| 367       | T             | 14            | 14           | 0             | 0:11.54                         |
| 368       | T             | 14            | 14           | 0             | 0:11.57                         |
| 369       | T             | 14            | 14           | 0             | 0:11.48                         |
| 370       | T             | 14            | 14           | 0             | 0:11.39                         |
| 371       | T             | 14            | 14           | 0             | 0:11.40                         |
| 372       | T             | 14            | 14           | 0             | 0:11.54                         |
| 373       | T             | 14            | 14           | 0             | 0:11.56                         |
| 374       | T             | 14            | 14           | 0             | 0:11.47                         |

| <b>Id</b> | <b>Result</b> | <b>#total</b> | <b>#true</b> | <b>#false</b> | <b>Execution time (min:sec)</b> |
|-----------|---------------|---------------|--------------|---------------|---------------------------------|
| 375       | T             | 14            | 14           | 0             | 0:11.50                         |
| 376       | T             | 14            | 14           | 0             | 0:11.52                         |
| 377       | T             | 14            | 14           | 0             | 0:11.49                         |
| 378       | T             | 14            | 14           | 0             | 0:11.50                         |
| 379       | T             | 14            | 14           | 0             | 0:11.50                         |
| 380       | T             | 14            | 14           | 0             | 0:11.51                         |
| 381       | T             | 14            | 14           | 0             | 0:11.46                         |
| 382       | T             | 14            | 14           | 0             | 0:11.51                         |
| 383       | T             | 14            | 14           | 0             | 0:11.54                         |
| 384       | T             | 14            | 14           | 0             | 0:11.60                         |
| 385       | T             | 14            | 14           | 0             | 0:11.57                         |
| 386       | T             | 14            | 14           | 0             | 0:11.49                         |
| 387       | T             | 14            | 14           | 0             | 0:11.58                         |
| 388       | T             | 14            | 14           | 0             | 0:11.52                         |
| 389       | T             | 14            | 14           | 0             | 0:11.52                         |
| 390       | T             | 14            | 14           | 0             | 0:11.41                         |
| 391       | T             | 14            | 14           | 0             | 0:11.52                         |
| 392       | T             | 14            | 14           | 0             | 0:12.24                         |
| 393       | T             | 14            | 14           | 0             | 0:11.51                         |
| 394       | T             | 14            | 14           | 0             | 0:11.52                         |
| 395       | T             | 14            | 14           | 0             | 0:11.46                         |
| 396       | T             | 14            | 14           | 0             | 0:11.47                         |
| 397       | T             | 14            | 14           | 0             | 0:11.38                         |
| 398       | T             | 14            | 14           | 0             | 0:11.45                         |
| 399       | T             | 14            | 14           | 0             | 0:11.49                         |
| 400       | T             | 14            | 14           | 0             | 0:11.55                         |
| 401       | T             | 14            | 14           | 0             | 0:11.54                         |
| 402       | T             | 14            | 14           | 0             | 0:11.48                         |
| 403       | T             | 14            | 14           | 0             | 0:11.51                         |
| 404       | T             | 14            | 14           | 0             | 0:11.56                         |
| 405       | T             | 14            | 14           | 0             | 0:11.48                         |
| 406       | T             | 14            | 14           | 0             | 0:11.48                         |
| 407       | T             | 14            | 14           | 0             | 0:11.46                         |
| 408       | T             | 14            | 14           | 0             | 0:11.42                         |
| 409       | T             | 14            | 14           | 0             | 0:11.56                         |
| 410       | T             | 14            | 14           | 0             | 0:11.41                         |
| 411       | T             | 14            | 14           | 0             | 0:11.47                         |
| 412       | T             | 14            | 14           | 0             | 0:11.48                         |
| 413       | T             | 14            | 14           | 0             | 0:11.50                         |
| 414       | T             | 14            | 14           | 0             | 0:11.51                         |
| 415       | T             | 14            | 14           | 0             | 0:11.60                         |
| 416       | T             | 14            | 14           | 0             | 0:11.56                         |
| 417       | T             | 14            | 14           | 0             | 0:11.45                         |
| 418       | T             | 14            | 14           | 0             | 0:11.45                         |
| 419       | T             | 14            | 14           | 0             | 0:11.51                         |
| 420       | T             | 14            | 14           | 0             | 0:11.50                         |
| 421       | T             | 14            | 14           | 0             | 0:11.52                         |
| 422       | T             | 14            | 14           | 0             | 0:11.47                         |

| <b>Id</b> | <b>Result</b> | <b>#total</b> | <b>#true</b> | <b>#false</b> | <b>Execution time (min:sec)</b> |
|-----------|---------------|---------------|--------------|---------------|---------------------------------|
| 423       | T             | 14            | 14           | 0             | 0:11.36                         |
| 424       | T             | 14            | 14           | 0             | 0:11.55                         |
| 425       | T             | 14            | 14           | 0             | 0:11.52                         |
| 426       | T             | 14            | 14           | 0             | 0:11.51                         |
| 427       | T             | 14            | 14           | 0             | 0:11.51                         |
| 428       | T             | 14            | 14           | 0             | 0:11.56                         |
| 429       | T             | 14            | 14           | 0             | 0:11.58                         |
| 430       | T             | 14            | 14           | 0             | 0:11.46                         |
| 431       | T             | 14            | 14           | 0             | 0:11.48                         |
| 432       | T             | 14            | 14           | 0             | 0:11.47                         |
| 433       | T             | 14            | 14           | 0             | 0:11.49                         |
| 434       | T             | 14            | 14           | 0             | 0:11.51                         |
| 435       | T             | 14            | 14           | 0             | 0:11.55                         |
| 436       | T             | 14            | 14           | 0             | 0:11.47                         |
| 437       | T             | 14            | 14           | 0             | 0:11.44                         |
| 438       | T             | 14            | 14           | 0             | 0:11.47                         |
| 439       | T             | 14            | 14           | 0             | 0:11.45                         |
| 440       | T             | 14            | 14           | 0             | 0:11.52                         |
| 441       | T             | 14            | 14           | 0             | 0:11.42                         |
| 442       | T             | 14            | 14           | 0             | 0:11.45                         |
| 443       | T             | 14            | 14           | 0             | 0:11.48                         |
| 444       | T             | 14            | 14           | 0             | 0:11.52                         |
| 445       | T             | 14            | 14           | 0             | 0:11.45                         |
| 446       | T             | 14            | 14           | 0             | 0:11.40                         |
| 447       | T             | 14            | 14           | 0             | 0:11.50                         |
| 448       | T             | 14            | 14           | 0             | 0:11.50                         |
| 449       | T             | 14            | 14           | 0             | 0:11.59                         |
| 450       | T             | 14            | 14           | 0             | 0:11.60                         |
| 451       | T             | 14            | 14           | 0             | 0:11.50                         |
| 452       | T             | 14            | 14           | 0             | 0:11.44                         |
| 453       | T             | 14            | 14           | 0             | 0:11.47                         |
| 454       | T             | 14            | 14           | 0             | 0:11.49                         |
| 455       | T             | 14            | 14           | 0             | 0:11.44                         |
| 456       | T             | 14            | 14           | 0             | 0:11.52                         |
| 457       | T             | 14            | 14           | 0             | 0:11.55                         |
| 458       | T             | 14            | 14           | 0             | 0:11.48                         |
| 459       | T             | 14            | 14           | 0             | 0:11.53                         |
| 460       | T             | 14            | 14           | 0             | 0:11.52                         |
| 461       | T             | 14            | 14           | 0             | 0:11.48                         |
| 462       | T             | 14            | 14           | 0             | 0:11.57                         |
| 463       | T             | 14            | 14           | 0             | 0:11.57                         |
| 464       | T             | 14            | 14           | 0             | 0:11.52                         |
| 465       | T             | 14            | 14           | 0             | 0:11.48                         |
| 466       | T             | 14            | 14           | 0             | 0:11.47                         |
| 467       | T             | 14            | 14           | 0             | 0:11.43                         |
| 468       | T             | 14            | 14           | 0             | 0:11.48                         |
| 469       | T             | 14            | 14           | 0             | 0:11.58                         |
| 470       | T             | 14            | 14           | 0             | 0:11.51                         |

| <b>Id</b> | <b>Result</b> | <b>#total</b> | <b>#true</b> | <b>#false</b> | <b>Execution time (min:sec)</b> |
|-----------|---------------|---------------|--------------|---------------|---------------------------------|
| 471       | T             | 14            | 14           | 0             | 0:11.64                         |
| 472       | T             | 14            | 14           | 0             | 0:11.54                         |
| 473       | T             | 14            | 14           | 0             | 0:11.48                         |
| 474       | T             | 14            | 14           | 0             | 0:11.52                         |
| 475       | T             | 14            | 14           | 0             | 0:11.44                         |
| 476       | T             | 14            | 14           | 0             | 0:11.50                         |
| 477       | T             | 14            | 14           | 0             | 0:11.60                         |
| 478       | T             | 14            | 14           | 0             | 0:11.45                         |
| 479       | T             | 14            | 14           | 0             | 0:11.53                         |
| 480       | T             | 14            | 14           | 0             | 0:11.47                         |
| 481       | T             | 14            | 14           | 0             | 0:11.54                         |
| 482       | T             | 14            | 14           | 0             | 0:11.50                         |
| 483       | T             | 14            | 14           | 0             | 0:11.52                         |
| 484       | T             | 14            | 14           | 0             | 0:11.52                         |
| 485       | T             | 14            | 14           | 0             | 0:11.53                         |
| 486       | T             | 14            | 14           | 0             | 0:11.47                         |
| 487       | T             | 14            | 14           | 0             | 0:11.60                         |
| 488       | T             | 14            | 14           | 0             | 0:11.57                         |
| 489       | T             | 14            | 14           | 0             | 0:11.37                         |
| 490       | T             | 14            | 14           | 0             | 0:11.59                         |
| 491       | T             | 14            | 14           | 0             | 0:11.54                         |
| 492       | T             | 14            | 14           | 0             | 0:11.47                         |
| 493       | T             | 14            | 14           | 0             | 0:11.39                         |
| 494       | T             | 14            | 14           | 0             | 0:11.46                         |
| 495       | T             | 14            | 14           | 0             | 0:11.42                         |
| 496       | T             | 14            | 14           | 0             | 0:11.56                         |
| 497       | T             | 14            | 14           | 0             | 0:11.45                         |
| 498       | T             | 14            | 14           | 0             | 0:11.51                         |
| 499       | T             | 14            | 14           | 0             | 0:11.51                         |
| 500       | T             | 14            | 14           | 0             | 0:11.52                         |

Table 3: Model checking results corresponding to logic property 11

| <b>Id</b> | <b>Result</b> | <b>#total</b> | <b>#true</b> | <b>#false</b> | <b>Execution time (min:sec)</b> |
|-----------|---------------|---------------|--------------|---------------|---------------------------------|
| 1         | T             | 58            | 0            | 58            | 0:44.89                         |
| 2         | T             | 58            | 0            | 58            | 0:44.62                         |
| 3         | T             | 58            | 0            | 58            | 0:44.56                         |
| 4         | T             | 58            | 0            | 58            | 0:44.66                         |
| 5         | T             | 58            | 0            | 58            | 0:45.08                         |
| 6         | T             | 58            | 0            | 58            | 0:45.01                         |
| 7         | T             | 58            | 0            | 58            | 0:44.62                         |
| 8         | T             | 58            | 0            | 58            | 0:44.59                         |
| 9         | T             | 58            | 0            | 58            | 0:44.94                         |
| 10        | T             | 58            | 0            | 58            | 0:44.77                         |
| 11        | T             | 58            | 0            | 58            | 0:44.93                         |

| <b>Id</b> | <b>Result</b> | <b>#total</b> | <b>#true</b> | <b>#false</b> | <b>Execution time (min:sec)</b> |
|-----------|---------------|---------------|--------------|---------------|---------------------------------|
| 12        | T             | 58            | 0            | 58            | 0:44.58                         |
| 13        | T             | 58            | 0            | 58            | 0:44.85                         |
| 14        | T             | 58            | 0            | 58            | 0:44.67                         |
| 15        | T             | 58            | 0            | 58            | 0:44.75                         |
| 16        | T             | 58            | 0            | 58            | 0:44.70                         |
| 17        | T             | 58            | 0            | 58            | 0:44.65                         |
| 18        | T             | 58            | 0            | 58            | 0:44.80                         |
| 19        | T             | 58            | 0            | 58            | 0:44.91                         |
| 20        | T             | 58            | 0            | 58            | 0:44.86                         |
| 21        | T             | 58            | 0            | 58            | 0:44.89                         |
| 22        | T             | 58            | 0            | 58            | 0:44.71                         |
| 23        | T             | 58            | 0            | 58            | 0:44.64                         |
| 24        | T             | 58            | 0            | 58            | 0:44.63                         |
| 25        | T             | 58            | 0            | 58            | 0:44.73                         |
| 26        | T             | 58            | 0            | 58            | 0:44.83                         |
| 27        | T             | 58            | 0            | 58            | 0:44.73                         |
| 28        | T             | 58            | 0            | 58            | 0:44.92                         |
| 29        | T             | 58            | 0            | 58            | 0:44.84                         |
| 30        | T             | 58            | 0            | 58            | 0:44.64                         |
| 31        | T             | 58            | 0            | 58            | 0:44.87                         |
| 32        | T             | 58            | 0            | 58            | 0:44.78                         |
| 33        | T             | 58            | 0            | 58            | 0:44.68                         |
| 34        | T             | 58            | 0            | 58            | 0:44.82                         |
| 35        | T             | 58            | 0            | 58            | 0:44.74                         |
| 36        | T             | 58            | 0            | 58            | 0:44.63                         |
| 37        | T             | 58            | 0            | 58            | 0:45.01                         |
| 38        | T             | 58            | 0            | 58            | 0:44.77                         |
| 39        | T             | 58            | 0            | 58            | 0:44.94                         |
| 40        | T             | 58            | 0            | 58            | 0:44.61                         |
| 41        | T             | 58            | 0            | 58            | 0:44.79                         |
| 42        | T             | 58            | 0            | 58            | 0:44.71                         |
| 43        | T             | 58            | 0            | 58            | 0:44.54                         |
| 44        | T             | 58            | 0            | 58            | 0:44.77                         |
| 45        | T             | 58            | 0            | 58            | 0:44.58                         |
| 46        | T             | 58            | 0            | 58            | 0:44.89                         |
| 47        | T             | 58            | 0            | 58            | 0:44.99                         |
| 48        | T             | 58            | 0            | 58            | 0:44.70                         |
| 49        | T             | 58            | 0            | 58            | 0:44.80                         |
| 50        | T             | 58            | 0            | 58            | 0:44.80                         |
| 51        | T             | 58            | 0            | 58            | 0:44.55                         |
| 52        | T             | 58            | 0            | 58            | 0:44.85                         |
| 53        | T             | 58            | 0            | 58            | 0:44.64                         |
| 54        | T             | 58            | 0            | 58            | 0:44.54                         |
| 55        | T             | 58            | 0            | 58            | 0:44.82                         |
| 56        | T             | 58            | 0            | 58            | 0:44.73                         |
| 57        | T             | 58            | 0            | 58            | 0:44.52                         |
| 58        | T             | 58            | 0            | 58            | 0:44.53                         |
| 59        | T             | 58            | 0            | 58            | 0:44.65                         |



| <b>Id</b> | <b>Result</b> | <b>#total</b> | <b>#true</b> | <b>#false</b> | <b>Execution time (min:sec)</b> |
|-----------|---------------|---------------|--------------|---------------|---------------------------------|
| 60        | T             | 58            | 0            | 58            | 0:45.17                         |
| 61        | T             | 58            | 0            | 58            | 0:44.65                         |
| 62        | T             | 58            | 0            | 58            | 0:44.55                         |
| 63        | T             | 58            | 0            | 58            | 0:44.63                         |
| 64        | T             | 58            | 0            | 58            | 0:44.37                         |
| 65        | T             | 58            | 0            | 58            | 0:44.48                         |
| 66        | T             | 58            | 0            | 58            | 0:44.92                         |
| 67        | T             | 58            | 0            | 58            | 0:44.78                         |
| 68        | T             | 58            | 0            | 58            | 0:44.65                         |
| 69        | T             | 58            | 0            | 58            | 0:44.61                         |
| 70        | T             | 58            | 0            | 58            | 0:44.59                         |
| 71        | T             | 58            | 0            | 58            | 0:44.80                         |
| 72        | T             | 58            | 0            | 58            | 0:44.75                         |
| 73        | T             | 58            | 0            | 58            | 0:44.56                         |
| 74        | T             | 58            | 0            | 58            | 0:44.65                         |
| 75        | T             | 58            | 0            | 58            | 0:44.78                         |
| 76        | T             | 58            | 0            | 58            | 0:44.63                         |
| 77        | T             | 58            | 0            | 58            | 0:44.64                         |
| 78        | T             | 58            | 0            | 58            | 0:44.62                         |
| 79        | T             | 58            | 0            | 58            | 0:44.86                         |
| 80        | T             | 58            | 0            | 58            | 0:44.52                         |
| 81        | T             | 58            | 0            | 58            | 0:44.51                         |
| 82        | T             | 58            | 0            | 58            | 0:44.75                         |
| 83        | T             | 58            | 0            | 58            | 0:44.69                         |
| 84        | T             | 58            | 0            | 58            | 0:44.72                         |
| 85        | T             | 58            | 0            | 58            | 0:44.72                         |
| 86        | T             | 58            | 0            | 58            | 0:44.77                         |
| 87        | T             | 58            | 0            | 58            | 0:44.72                         |
| 88        | T             | 58            | 0            | 58            | 0:44.76                         |
| 89        | T             | 58            | 0            | 58            | 0:44.72                         |
| 90        | T             | 58            | 0            | 58            | 0:44.62                         |
| 91        | T             | 58            | 0            | 58            | 0:44.53                         |
| 92        | T             | 58            | 0            | 58            | 0:44.98                         |
| 93        | T             | 58            | 0            | 58            | 0:44.81                         |
| 94        | T             | 58            | 0            | 58            | 0:44.73                         |
| 95        | T             | 58            | 0            | 58            | 0:44.87                         |
| 96        | T             | 58            | 0            | 58            | 0:44.86                         |
| 97        | T             | 58            | 0            | 58            | 0:48.64                         |
| 98        | T             | 58            | 0            | 58            | 0:44.70                         |
| 99        | T             | 58            | 0            | 58            | 0:44.88                         |
| 100       | T             | 58            | 0            | 58            | 0:44.68                         |
| 101       | T             | 58            | 0            | 58            | 0:44.59                         |
| 102       | T             | 58            | 0            | 58            | 0:44.81                         |
| 103       | T             | 58            | 0            | 58            | 0:44.61                         |
| 104       | T             | 58            | 0            | 58            | 0:44.60                         |
| 105       | T             | 58            | 0            | 58            | 0:44.67                         |
| 106       | T             | 58            | 0            | 58            | 0:44.76                         |
| 107       | T             | 58            | 0            | 58            | 0:44.90                         |

| Id  | Result | #total | #true | #false | Execution time (min:sec) |
|-----|--------|--------|-------|--------|--------------------------|
| 108 | T      | 58     | 0     | 58     | 0:44.78                  |
| 109 | T      | 58     | 0     | 58     | 0:44.80                  |
| 110 | T      | 58     | 0     | 58     | 0:44.79                  |
| 111 | T      | 58     | 0     | 58     | 0:44.82                  |
| 112 | T      | 58     | 0     | 58     | 0:44.64                  |
| 113 | T      | 58     | 0     | 58     | 0:44.95                  |
| 114 | T      | 58     | 0     | 58     | 0:44.70                  |
| 115 | T      | 58     | 0     | 58     | 0:44.73                  |
| 116 | T      | 58     | 0     | 58     | 0:44.78                  |
| 117 | T      | 58     | 0     | 58     | 0:44.63                  |
| 118 | T      | 58     | 0     | 58     | 0:44.66                  |
| 119 | T      | 58     | 0     | 58     | 0:44.89                  |
| 120 | T      | 58     | 0     | 58     | 0:44.64                  |
| 121 | T      | 58     | 0     | 58     | 0:44.61                  |
| 122 | T      | 58     | 0     | 58     | 0:44.66                  |
| 123 | T      | 58     | 0     | 58     | 0:44.41                  |
| 124 | T      | 58     | 0     | 58     | 0:44.68                  |
| 125 | T      | 58     | 0     | 58     | 0:44.48                  |
| 126 | T      | 58     | 0     | 58     | 0:44.81                  |
| 127 | T      | 58     | 0     | 58     | 0:45.70                  |
| 128 | T      | 58     | 0     | 58     | 0:44.81                  |
| 129 | T      | 58     | 0     | 58     | 0:44.77                  |
| 130 | T      | 58     | 0     | 58     | 0:44.45                  |
| 131 | T      | 58     | 0     | 58     | 0:44.64                  |
| 132 | T      | 58     | 0     | 58     | 0:44.84                  |
| 133 | T      | 58     | 0     | 58     | 0:44.58                  |
| 134 | T      | 58     | 0     | 58     | 0:44.86                  |
| 135 | T      | 58     | 0     | 58     | 0:44.77                  |
| 136 | T      | 58     | 0     | 58     | 0:44.46                  |
| 137 | T      | 58     | 0     | 58     | 0:44.56                  |
| 138 | T      | 58     | 0     | 58     | 0:44.74                  |
| 139 | T      | 58     | 0     | 58     | 0:44.80                  |
| 140 | T      | 58     | 0     | 58     | 0:44.68                  |
| 141 | T      | 58     | 0     | 58     | 0:44.78                  |
| 142 | T      | 58     | 0     | 58     | 0:44.81                  |
| 143 | T      | 58     | 0     | 58     | 0:44.72                  |
| 144 | T      | 58     | 0     | 58     | 0:45.16                  |
| 145 | T      | 58     | 0     | 58     | 0:44.65                  |
| 146 | T      | 58     | 0     | 58     | 0:44.89                  |
| 147 | T      | 58     | 0     | 58     | 0:44.81                  |
| 148 | T      | 58     | 0     | 58     | 0:46.90                  |
| 149 | T      | 58     | 0     | 58     | 0:44.89                  |
| 150 | T      | 58     | 0     | 58     | 0:44.95                  |
| 151 | T      | 58     | 0     | 58     | 0:44.68                  |
| 152 | T      | 58     | 0     | 58     | 0:44.91                  |
| 153 | T      | 58     | 0     | 58     | 0:44.80                  |
| 154 | T      | 58     | 0     | 58     | 0:44.67                  |
| 155 | T      | 58     | 0     | 58     | 0:44.66                  |

| Id  | Result | #total | #true | #false | Execution time (min:sec) |
|-----|--------|--------|-------|--------|--------------------------|
| 156 | T      | 58     | 0     | 58     | 0:44.63                  |
| 157 | T      | 58     | 0     | 58     | 0:44.83                  |
| 158 | T      | 58     | 0     | 58     | 0:44.62                  |
| 159 | T      | 58     | 0     | 58     | 0:44.64                  |
| 160 | T      | 58     | 0     | 58     | 0:44.69                  |
| 161 | T      | 58     | 0     | 58     | 0:44.71                  |
| 162 | T      | 58     | 0     | 58     | 0:44.63                  |
| 163 | T      | 58     | 0     | 58     | 0:44.92                  |
| 164 | T      | 58     | 0     | 58     | 0:44.72                  |
| 165 | T      | 58     | 0     | 58     | 0:44.55                  |
| 166 | T      | 58     | 0     | 58     | 0:44.71                  |
| 167 | T      | 58     | 0     | 58     | 0:44.79                  |
| 168 | T      | 58     | 0     | 58     | 0:44.56                  |
| 169 | T      | 58     | 0     | 58     | 0:44.82                  |
| 170 | T      | 58     | 0     | 58     | 0:44.68                  |
| 171 | T      | 58     | 0     | 58     | 0:44.96                  |
| 172 | T      | 58     | 0     | 58     | 0:44.73                  |
| 173 | T      | 58     | 0     | 58     | 0:44.87                  |
| 174 | T      | 58     | 0     | 58     | 0:44.55                  |
| 175 | T      | 58     | 0     | 58     | 0:44.64                  |
| 176 | T      | 58     | 0     | 58     | 0:44.58                  |
| 177 | T      | 58     | 0     | 58     | 0:44.72                  |
| 178 | T      | 58     | 0     | 58     | 0:45.02                  |
| 179 | T      | 58     | 0     | 58     | 0:44.82                  |
| 180 | T      | 58     | 0     | 58     | 0:44.80                  |
| 181 | T      | 58     | 0     | 58     | 0:44.99                  |
| 182 | T      | 58     | 0     | 58     | 0:44.71                  |
| 183 | T      | 58     | 0     | 58     | 0:44.84                  |
| 184 | T      | 58     | 0     | 58     | 0:44.88                  |
| 185 | T      | 58     | 0     | 58     | 0:45.09                  |
| 186 | T      | 58     | 0     | 58     | 0:44.71                  |
| 187 | T      | 58     | 0     | 58     | 0:44.69                  |
| 188 | T      | 58     | 0     | 58     | 0:44.65                  |
| 189 | T      | 58     | 0     | 58     | 0:44.83                  |
| 190 | T      | 58     | 0     | 58     | 0:44.57                  |
| 191 | T      | 58     | 0     | 58     | 0:44.88                  |
| 192 | T      | 58     | 0     | 58     | 0:44.82                  |
| 193 | T      | 58     | 0     | 58     | 0:44.78                  |
| 194 | T      | 58     | 0     | 58     | 0:44.74                  |
| 195 | T      | 58     | 0     | 58     | 0:44.75                  |
| 196 | T      | 58     | 0     | 58     | 0:44.85                  |
| 197 | T      | 58     | 0     | 58     | 0:44.69                  |
| 198 | T      | 58     | 0     | 58     | 0:44.72                  |
| 199 | T      | 58     | 0     | 58     | 0:44.74                  |
| 200 | T      | 58     | 0     | 58     | 0:44.67                  |
| 201 | T      | 58     | 0     | 58     | 0:44.66                  |
| 202 | T      | 58     | 0     | 58     | 0:44.80                  |
| 203 | T      | 58     | 0     | 58     | 0:44.87                  |

| <b>Id</b> | <b>Result</b> | <b>#total</b> | <b>#true</b> | <b>#false</b> | <b>Execution time (min:sec)</b> |
|-----------|---------------|---------------|--------------|---------------|---------------------------------|
| 204       | T             | 58            | 0            | 58            | 0:44.72                         |
| 205       | T             | 58            | 0            | 58            | 0:44.86                         |
| 206       | T             | 58            | 0            | 58            | 0:44.77                         |
| 207       | T             | 58            | 0            | 58            | 0:44.91                         |
| 208       | T             | 58            | 0            | 58            | 0:44.73                         |
| 209       | T             | 58            | 0            | 58            | 0:44.79                         |
| 210       | T             | 58            | 0            | 58            | 0:44.80                         |
| 211       | T             | 58            | 0            | 58            | 0:44.61                         |
| 212       | T             | 58            | 0            | 58            | 0:45.04                         |
| 213       | T             | 58            | 0            | 58            | 0:44.74                         |
| 214       | T             | 58            | 0            | 58            | 0:45.11                         |
| 215       | T             | 58            | 0            | 58            | 0:44.94                         |
| 216       | T             | 58            | 0            | 58            | 0:45.00                         |
| 217       | T             | 58            | 0            | 58            | 0:44.93                         |
| 218       | T             | 58            | 0            | 58            | 0:44.64                         |
| 219       | T             | 58            | 0            | 58            | 0:45.00                         |
| 220       | T             | 58            | 0            | 58            | 0:45.21                         |
| 221       | T             | 58            | 0            | 58            | 0:44.67                         |
| 222       | T             | 58            | 0            | 58            | 0:44.80                         |
| 223       | T             | 58            | 0            | 58            | 0:44.82                         |
| 224       | T             | 58            | 0            | 58            | 0:44.89                         |
| 225       | T             | 58            | 0            | 58            | 0:44.69                         |
| 226       | T             | 58            | 0            | 58            | 0:44.89                         |
| 227       | T             | 58            | 0            | 58            | 0:44.92                         |
| 228       | T             | 58            | 0            | 58            | 0:44.88                         |
| 229       | T             | 58            | 0            | 58            | 0:44.66                         |
| 230       | T             | 58            | 0            | 58            | 0:44.74                         |
| 231       | T             | 58            | 0            | 58            | 0:44.97                         |
| 232       | T             | 58            | 0            | 58            | 0:44.83                         |
| 233       | T             | 58            | 0            | 58            | 0:44.70                         |
| 234       | T             | 58            | 0            | 58            | 0:44.79                         |
| 235       | T             | 58            | 0            | 58            | 0:44.61                         |
| 236       | T             | 58            | 0            | 58            | 0:44.87                         |
| 237       | T             | 58            | 0            | 58            | 0:44.99                         |
| 238       | T             | 58            | 0            | 58            | 0:44.80                         |
| 239       | T             | 58            | 0            | 58            | 0:44.97                         |
| 240       | T             | 58            | 0            | 58            | 0:44.75                         |
| 241       | T             | 58            | 0            | 58            | 0:44.89                         |
| 242       | T             | 58            | 0            | 58            | 0:44.59                         |
| 243       | T             | 58            | 0            | 58            | 0:44.80                         |
| 244       | T             | 58            | 0            | 58            | 0:44.69                         |
| 245       | T             | 58            | 0            | 58            | 0:44.96                         |
| 246       | T             | 58            | 0            | 58            | 0:44.63                         |
| 247       | T             | 58            | 0            | 58            | 0:44.91                         |
| 248       | T             | 58            | 0            | 58            | 0:44.93                         |
| 249       | T             | 58            | 0            | 58            | 0:45.24                         |
| 250       | T             | 58            | 0            | 58            | 0:44.76                         |
| 251       | T             | 58            | 0            | 58            | 0:44.79                         |

| <b>Id</b> | <b>Result</b> | <b>#total</b> | <b>#true</b> | <b>#false</b> | <b>Execution time (min:sec)</b> |
|-----------|---------------|---------------|--------------|---------------|---------------------------------|
| 252       | T             | 58            | 0            | 58            | 0:44.89                         |
| 253       | T             | 58            | 0            | 58            | 0:45.04                         |
| 254       | T             | 58            | 0            | 58            | 0:44.77                         |
| 255       | T             | 58            | 0            | 58            | 0:44.68                         |
| 256       | T             | 58            | 0            | 58            | 0:44.58                         |
| 257       | T             | 58            | 0            | 58            | 0:44.75                         |
| 258       | T             | 58            | 0            | 58            | 0:44.97                         |
| 259       | T             | 58            | 0            | 58            | 0:44.84                         |
| 260       | T             | 58            | 0            | 58            | 0:44.95                         |
| 261       | T             | 58            | 0            | 58            | 0:44.59                         |
| 262       | T             | 58            | 0            | 58            | 0:44.77                         |
| 263       | T             | 58            | 0            | 58            | 0:44.72                         |
| 264       | T             | 58            | 0            | 58            | 0:44.69                         |
| 265       | T             | 58            | 0            | 58            | 0:44.76                         |
| 266       | T             | 58            | 0            | 58            | 0:44.82                         |
| 267       | T             | 58            | 0            | 58            | 0:44.83                         |
| 268       | T             | 58            | 0            | 58            | 0:44.73                         |
| 269       | T             | 58            | 0            | 58            | 0:44.83                         |
| 270       | T             | 58            | 0            | 58            | 0:44.88                         |
| 271       | T             | 58            | 0            | 58            | 0:44.84                         |
| 272       | T             | 58            | 0            | 58            | 0:44.83                         |
| 273       | T             | 58            | 0            | 58            | 0:44.87                         |
| 274       | T             | 58            | 0            | 58            | 0:44.81                         |
| 275       | T             | 58            | 0            | 58            | 0:44.79                         |
| 276       | T             | 58            | 0            | 58            | 0:44.60                         |
| 277       | T             | 58            | 0            | 58            | 0:45.20                         |
| 278       | T             | 58            | 0            | 58            | 0:44.91                         |
| 279       | T             | 58            | 0            | 58            | 0:44.80                         |
| 280       | T             | 58            | 0            | 58            | 0:44.78                         |
| 281       | T             | 58            | 0            | 58            | 0:44.57                         |
| 282       | T             | 58            | 0            | 58            | 0:44.74                         |
| 283       | T             | 58            | 0            | 58            | 0:45.07                         |
| 284       | T             | 58            | 0            | 58            | 0:45.03                         |
| 285       | T             | 58            | 0            | 58            | 0:45.18                         |
| 286       | T             | 58            | 0            | 58            | 0:45.01                         |
| 287       | T             | 58            | 0            | 58            | 0:44.64                         |
| 288       | T             | 58            | 0            | 58            | 0:44.86                         |
| 289       | T             | 58            | 0            | 58            | 0:47.69                         |
| 290       | T             | 58            | 0            | 58            | 0:45.10                         |
| 291       | T             | 58            | 0            | 58            | 0:44.86                         |
| 292       | T             | 58            | 0            | 58            | 0:44.80                         |
| 293       | T             | 58            | 0            | 58            | 0:44.95                         |
| 294       | T             | 58            | 0            | 58            | 0:44.91                         |
| 295       | T             | 58            | 0            | 58            | 0:44.86                         |
| 296       | T             | 58            | 0            | 58            | 0:44.98                         |
| 297       | T             | 58            | 0            | 58            | 0:44.84                         |
| 298       | T             | 58            | 0            | 58            | 0:44.75                         |
| 299       | T             | 58            | 0            | 58            | 0:45.14                         |

| <b>Id</b> | <b>Result</b> | <b>#total</b> | <b>#true</b> | <b>#false</b> | <b>Execution time (min:sec)</b> |
|-----------|---------------|---------------|--------------|---------------|---------------------------------|
| 300       | T             | 58            | 0            | 58            | 0:44.77                         |
| 301       | T             | 58            | 0            | 58            | 0:44.64                         |
| 302       | T             | 58            | 0            | 58            | 0:44.79                         |
| 303       | T             | 58            | 0            | 58            | 0:44.82                         |
| 304       | T             | 58            | 0            | 58            | 0:44.87                         |
| 305       | T             | 58            | 0            | 58            | 0:44.80                         |
| 306       | T             | 58            | 0            | 58            | 0:44.98                         |
| 307       | T             | 58            | 0            | 58            | 0:45.00                         |
| 308       | T             | 58            | 0            | 58            | 0:45.00                         |
| 309       | T             | 58            | 0            | 58            | 0:44.58                         |
| 310       | T             | 58            | 0            | 58            | 0:44.78                         |
| 311       | T             | 58            | 0            | 58            | 0:44.89                         |
| 312       | T             | 58            | 0            | 58            | 0:44.80                         |
| 313       | T             | 58            | 0            | 58            | 0:45.10                         |
| 314       | T             | 58            | 0            | 58            | 0:44.85                         |
| 315       | T             | 58            | 0            | 58            | 0:44.70                         |
| 316       | T             | 58            | 0            | 58            | 0:45.24                         |
| 317       | T             | 58            | 0            | 58            | 0:44.72                         |
| 318       | T             | 58            | 0            | 58            | 0:44.94                         |
| 319       | T             | 58            | 0            | 58            | 0:44.78                         |
| 320       | T             | 58            | 0            | 58            | 0:44.83                         |
| 321       | T             | 58            | 0            | 58            | 0:44.71                         |
| 322       | T             | 58            | 0            | 58            | 0:44.86                         |
| 323       | T             | 58            | 0            | 58            | 0:44.87                         |
| 324       | T             | 58            | 0            | 58            | 0:45.07                         |
| 325       | T             | 58            | 0            | 58            | 0:44.75                         |
| 326       | T             | 58            | 0            | 58            | 0:44.94                         |
| 327       | T             | 58            | 0            | 58            | 0:44.87                         |
| 328       | T             | 58            | 0            | 58            | 0:44.47                         |
| 329       | T             | 58            | 0            | 58            | 0:44.84                         |
| 330       | T             | 58            | 0            | 58            | 0:44.87                         |
| 331       | T             | 58            | 0            | 58            | 0:48.69                         |
| 332       | T             | 58            | 0            | 58            | 0:45.29                         |
| 333       | T             | 58            | 0            | 58            | 0:44.58                         |
| 334       | T             | 58            | 0            | 58            | 0:44.76                         |
| 335       | T             | 58            | 0            | 58            | 0:44.57                         |
| 336       | T             | 58            | 0            | 58            | 0:44.91                         |
| 337       | T             | 58            | 0            | 58            | 0:44.78                         |
| 338       | T             | 58            | 0            | 58            | 0:45.13                         |
| 339       | T             | 58            | 0            | 58            | 0:44.73                         |
| 340       | T             | 58            | 0            | 58            | 0:44.77                         |
| 341       | T             | 58            | 0            | 58            | 0:45.00                         |
| 342       | T             | 58            | 0            | 58            | 0:44.79                         |
| 343       | T             | 58            | 0            | 58            | 0:44.73                         |
| 344       | T             | 58            | 0            | 58            | 0:44.94                         |
| 345       | T             | 58            | 0            | 58            | 0:44.91                         |
| 346       | T             | 58            | 0            | 58            | 0:45.01                         |
| 347       | T             | 58            | 0            | 58            | 0:44.99                         |

| <b>Id</b> | <b>Result</b> | <b>#total</b> | <b>#true</b> | <b>#false</b> | <b>Execution time (min:sec)</b> |
|-----------|---------------|---------------|--------------|---------------|---------------------------------|
| 348       | T             | 58            | 0            | 58            | 0:44.80                         |
| 349       | T             | 58            | 0            | 58            | 0:44.74                         |
| 350       | T             | 58            | 0            | 58            | 0:44.93                         |
| 351       | T             | 58            | 0            | 58            | 0:44.94                         |
| 352       | T             | 58            | 0            | 58            | 0:44.82                         |
| 353       | T             | 58            | 0            | 58            | 0:45.08                         |
| 354       | T             | 58            | 0            | 58            | 0:45.03                         |
| 355       | T             | 58            | 0            | 58            | 0:44.85                         |
| 356       | T             | 58            | 0            | 58            | 0:44.68                         |
| 357       | T             | 58            | 0            | 58            | 0:45.17                         |
| 358       | T             | 58            | 0            | 58            | 0:45.05                         |
| 359       | T             | 58            | 0            | 58            | 0:44.93                         |
| 360       | T             | 58            | 0            | 58            | 0:44.79                         |
| 361       | T             | 58            | 0            | 58            | 0:44.76                         |
| 362       | T             | 58            | 0            | 58            | 0:44.79                         |
| 363       | T             | 58            | 0            | 58            | 0:44.92                         |
| 364       | T             | 58            | 0            | 58            | 0:44.59                         |
| 365       | T             | 58            | 0            | 58            | 0:45.05                         |
| 366       | T             | 58            | 0            | 58            | 0:44.77                         |
| 367       | T             | 58            | 0            | 58            | 0:44.70                         |
| 368       | T             | 58            | 0            | 58            | 0:44.85                         |
| 369       | T             | 58            | 0            | 58            | 0:44.82                         |
| 370       | T             | 58            | 0            | 58            | 0:44.66                         |
| 371       | T             | 58            | 0            | 58            | 0:44.73                         |
| 372       | T             | 58            | 0            | 58            | 0:44.60                         |
| 373       | T             | 58            | 0            | 58            | 0:44.99                         |
| 374       | T             | 58            | 0            | 58            | 0:44.82                         |
| 375       | T             | 58            | 0            | 58            | 0:44.93                         |
| 376       | T             | 58            | 0            | 58            | 0:44.84                         |
| 377       | T             | 58            | 0            | 58            | 0:45.48                         |
| 378       | T             | 58            | 0            | 58            | 0:44.99                         |
| 379       | T             | 58            | 0            | 58            | 0:44.88                         |
| 380       | T             | 58            | 0            | 58            | 0:44.76                         |
| 381       | T             | 58            | 0            | 58            | 0:44.85                         |
| 382       | T             | 58            | 0            | 58            | 0:44.72                         |
| 383       | T             | 58            | 0            | 58            | 0:44.56                         |
| 384       | T             | 58            | 0            | 58            | 0:44.70                         |
| 385       | T             | 58            | 0            | 58            | 0:44.79                         |
| 386       | T             | 58            | 0            | 58            | 0:44.83                         |
| 387       | T             | 58            | 0            | 58            | 0:44.90                         |
| 388       | T             | 58            | 0            | 58            | 0:44.85                         |
| 389       | T             | 58            | 0            | 58            | 0:45.11                         |
| 390       | T             | 58            | 0            | 58            | 0:44.89                         |
| 391       | T             | 58            | 0            | 58            | 0:44.73                         |
| 392       | T             | 58            | 0            | 58            | 0:45.08                         |
| 393       | T             | 58            | 0            | 58            | 0:44.88                         |
| 394       | T             | 58            | 0            | 58            | 0:45.59                         |
| 395       | T             | 58            | 0            | 58            | 0:45.58                         |

| <b>Id</b> | <b>Result</b> | <b>#total</b> | <b>#true</b> | <b>#false</b> | <b>Execution time (min:sec)</b> |
|-----------|---------------|---------------|--------------|---------------|---------------------------------|
| 396       | T             | 58            | 0            | 58            | 0:45.14                         |
| 397       | T             | 58            | 0            | 58            | 0:45.03                         |
| 398       | T             | 58            | 0            | 58            | 0:44.95                         |
| 399       | T             | 58            | 0            | 58            | 0:44.91                         |
| 400       | T             | 58            | 0            | 58            | 0:44.83                         |
| 401       | T             | 58            | 0            | 58            | 0:44.92                         |
| 402       | T             | 58            | 0            | 58            | 0:44.82                         |
| 403       | T             | 58            | 0            | 58            | 0:44.87                         |
| 404       | T             | 58            | 0            | 58            | 0:44.51                         |
| 405       | T             | 58            | 0            | 58            | 0:44.97                         |
| 406       | T             | 58            | 0            | 58            | 0:44.94                         |
| 407       | T             | 58            | 0            | 58            | 0:46.46                         |
| 408       | T             | 58            | 0            | 58            | 0:45.12                         |
| 409       | T             | 58            | 0            | 58            | 0:44.82                         |
| 410       | T             | 58            | 0            | 58            | 0:44.99                         |
| 411       | T             | 58            | 0            | 58            | 0:44.73                         |
| 412       | T             | 58            | 0            | 58            | 0:44.75                         |
| 413       | T             | 58            | 0            | 58            | 0:44.60                         |
| 414       | T             | 58            | 0            | 58            | 0:44.80                         |
| 415       | T             | 58            | 0            | 58            | 0:44.93                         |
| 416       | T             | 58            | 0            | 58            | 0:44.60                         |
| 417       | T             | 58            | 0            | 58            | 0:44.94                         |
| 418       | T             | 58            | 0            | 58            | 0:44.94                         |
| 419       | T             | 58            | 0            | 58            | 0:45.12                         |
| 420       | T             | 58            | 0            | 58            | 0:44.76                         |
| 421       | T             | 58            | 0            | 58            | 0:44.86                         |
| 422       | T             | 58            | 0            | 58            | 0:44.79                         |
| 423       | T             | 58            | 0            | 58            | 0:44.71                         |
| 424       | T             | 58            | 0            | 58            | 0:44.60                         |
| 425       | T             | 58            | 0            | 58            | 0:44.56                         |
| 426       | T             | 58            | 0            | 58            | 0:46.99                         |
| 427       | T             | 58            | 0            | 58            | 0:44.85                         |
| 428       | T             | 58            | 0            | 58            | 0:44.94                         |
| 429       | T             | 58            | 0            | 58            | 0:44.84                         |
| 430       | T             | 58            | 0            | 58            | 0:44.90                         |
| 431       | T             | 58            | 0            | 58            | 0:44.74                         |
| 432       | T             | 58            | 0            | 58            | 0:44.89                         |
| 433       | T             | 58            | 0            | 58            | 0:44.89                         |
| 434       | T             | 58            | 0            | 58            | 0:44.98                         |
| 435       | T             | 58            | 0            | 58            | 0:45.04                         |
| 436       | T             | 58            | 0            | 58            | 0:44.85                         |
| 437       | T             | 58            | 0            | 58            | 0:48.51                         |
| 438       | T             | 58            | 0            | 58            | 0:44.78                         |
| 439       | T             | 58            | 0            | 58            | 0:44.62                         |
| 440       | T             | 58            | 0            | 58            | 0:44.70                         |
| 441       | T             | 58            | 0            | 58            | 0:44.51                         |
| 442       | T             | 58            | 0            | 58            | 0:44.81                         |
| 443       | T             | 58            | 0            | 58            | 0:44.73                         |



| <b>Id</b> | <b>Result</b> | <b>#total</b> | <b>#true</b> | <b>#false</b> | <b>Execution time (min:sec)</b> |
|-----------|---------------|---------------|--------------|---------------|---------------------------------|
| 444       | T             | 58            | 0            | 58            | 0:44.99                         |
| 445       | T             | 58            | 0            | 58            | 0:44.80                         |
| 446       | T             | 58            | 0            | 58            | 0:45.05                         |
| 447       | T             | 58            | 0            | 58            | 0:44.74                         |
| 448       | T             | 58            | 0            | 58            | 0:44.89                         |
| 449       | T             | 58            | 0            | 58            | 0:44.73                         |
| 450       | T             | 58            | 0            | 58            | 0:44.71                         |
| 451       | T             | 58            | 0            | 58            | 0:44.67                         |
| 452       | T             | 58            | 0            | 58            | 0:44.98                         |
| 453       | T             | 58            | 0            | 58            | 0:45.03                         |
| 454       | T             | 58            | 0            | 58            | 0:44.88                         |
| 455       | T             | 58            | 0            | 58            | 0:44.89                         |
| 456       | T             | 58            | 0            | 58            | 0:45.05                         |
| 457       | T             | 58            | 0            | 58            | 0:44.99                         |
| 458       | T             | 58            | 0            | 58            | 0:44.94                         |
| 459       | T             | 58            | 0            | 58            | 0:44.91                         |
| 460       | T             | 58            | 0            | 58            | 0:45.06                         |
| 461       | T             | 58            | 0            | 58            | 0:45.01                         |
| 462       | T             | 58            | 0            | 58            | 0:45.45                         |
| 463       | T             | 58            | 0            | 58            | 0:44.85                         |
| 464       | T             | 58            | 0            | 58            | 0:44.94                         |
| 465       | T             | 58            | 0            | 58            | 0:44.87                         |
| 466       | T             | 58            | 0            | 58            | 0:45.16                         |
| 467       | T             | 58            | 0            | 58            | 0:45.07                         |
| 468       | T             | 58            | 0            | 58            | 0:45.17                         |
| 469       | T             | 58            | 0            | 58            | 0:45.29                         |
| 470       | T             | 58            | 0            | 58            | 0:45.03                         |
| 471       | T             | 58            | 0            | 58            | 0:44.73                         |
| 472       | T             | 58            | 0            | 58            | 0:45.25                         |
| 473       | T             | 58            | 0            | 58            | 0:44.68                         |
| 474       | T             | 58            | 0            | 58            | 0:45.02                         |
| 475       | T             | 58            | 0            | 58            | 0:44.96                         |
| 476       | T             | 58            | 0            | 58            | 0:44.92                         |
| 477       | T             | 58            | 0            | 58            | 0:45.32                         |
| 478       | T             | 58            | 0            | 58            | 0:45.79                         |
| 479       | T             | 58            | 0            | 58            | 0:44.98                         |
| 480       | T             | 58            | 0            | 58            | 0:45.12                         |
| 481       | T             | 58            | 0            | 58            | 0:45.06                         |
| 482       | T             | 58            | 0            | 58            | 0:45.10                         |
| 483       | T             | 58            | 0            | 58            | 0:45.00                         |
| 484       | T             | 58            | 0            | 58            | 0:45.16                         |
| 485       | T             | 58            | 0            | 58            | 0:45.65                         |
| 486       | T             | 58            | 0            | 58            | 0:44.78                         |
| 487       | T             | 58            | 0            | 58            | 0:44.83                         |
| 488       | T             | 58            | 0            | 58            | 0:44.96                         |
| 489       | T             | 58            | 0            | 58            | 0:44.77                         |
| 490       | T             | 58            | 0            | 58            | 0:45.09                         |
| 491       | T             | 58            | 0            | 58            | 0:44.84                         |

| <b>Id</b> | <b>Result</b> | <b>#total</b> | <b>#true</b> | <b>#false</b> | <b>Execution time (min:sec)</b> |
|-----------|---------------|---------------|--------------|---------------|---------------------------------|
| 492       | T             | 58            | 0            | 58            | 0:44.94                         |
| 493       | T             | 58            | 0            | 58            | 0:45.05                         |
| 494       | T             | 58            | 0            | 58            | 0:45.16                         |
| 495       | T             | 58            | 0            | 58            | 0:47.79                         |
| 496       | T             | 58            | 0            | 58            | 0:45.08                         |
| 497       | T             | 58            | 0            | 58            | 0:48.27                         |
| 498       | T             | 58            | 0            | 58            | 0:45.13                         |
| 499       | T             | 58            | 0            | 58            | 0:45.07                         |
| 500       | T             | 58            | 0            | 58            | 0:44.78                         |

Table 4: Model checking results corresponding to logic property 12

| <b>Id</b> | <b>Result</b> | <b>#total</b> | <b>#true</b> | <b>#false</b> | <b>Execution time (min:sec)</b> |
|-----------|---------------|---------------|--------------|---------------|---------------------------------|
| 1         | T             | 10            | 9            | 1             | 0:08.71                         |
| 2         | T             | 11            | 11           | 0             | 0:09.51                         |
| 3         | T             | 10            | 9            | 1             | 0:08.69                         |
| 4         | T             | 11            | 11           | 0             | 0:09.64                         |
| 5         | T             | 11            | 11           | 0             | 0:09.41                         |
| 6         | T             | 11            | 11           | 0             | 0:09.42                         |
| 7         | T             | 11            | 11           | 0             | 0:09.39                         |
| 8         | T             | 11            | 11           | 0             | 0:09.46                         |
| 9         | T             | 11            | 11           | 0             | 0:09.37                         |
| 10        | T             | 11            | 11           | 0             | 0:09.35                         |
| 11        | T             | 11            | 11           | 0             | 0:09.45                         |
| 12        | T             | 11            | 11           | 0             | 0:09.47                         |
| 13        | T             | 11            | 11           | 0             | 0:09.47                         |
| 14        | T             | 11            | 11           | 0             | 0:09.39                         |
| 15        | T             | 11            | 11           | 0             | 0:09.40                         |
| 16        | T             | 11            | 11           | 0             | 0:09.39                         |
| 17        | T             | 11            | 11           | 0             | 0:09.39                         |
| 18        | T             | 11            | 11           | 0             | 0:09.38                         |
| 19        | T             | 11            | 11           | 0             | 0:09.34                         |
| 20        | T             | 11            | 11           | 0             | 0:09.40                         |
| 21        | T             | 11            | 11           | 0             | 0:09.34                         |
| 22        | T             | 11            | 11           | 0             | 0:09.27                         |
| 23        | T             | 11            | 11           | 0             | 0:09.31                         |
| 24        | T             | 11            | 11           | 0             | 0:09.33                         |
| 25        | T             | 11            | 11           | 0             | 0:09.35                         |
| 26        | T             | 11            | 11           | 0             | 0:09.34                         |
| 27        | T             | 11            | 11           | 0             | 0:09.38                         |
| 28        | T             | 11            | 11           | 0             | 0:09.35                         |
| 29        | T             | 11            | 11           | 0             | 0:09.36                         |
| 30        | T             | 11            | 11           | 0             | 0:09.37                         |
| 31        | T             | 11            | 11           | 0             | 0:09.41                         |
| 32        | T             | 11            | 11           | 0             | 0:09.36                         |

| <b>Id</b> | <b>Result</b> | <b>#total</b> | <b>#true</b> | <b>#false</b> | <b>Execution time (min:sec)</b> |
|-----------|---------------|---------------|--------------|---------------|---------------------------------|
| 33        | T             | 10            | 9            | 1             | 0:08.63                         |
| 34        | T             | 11            | 11           | 0             | 0:09.42                         |
| 35        | T             | 11            | 11           | 0             | 0:09.38                         |
| 36        | T             | 11            | 11           | 0             | 0:09.33                         |
| 37        | T             | 11            | 11           | 0             | 0:09.37                         |
| 38        | T             | 11            | 11           | 0             | 0:09.30                         |
| 39        | T             | 11            | 11           | 0             | 0:09.44                         |
| 40        | T             | 11            | 11           | 0             | 0:09.36                         |
| 41        | T             | 11            | 11           | 0             | 0:09.25                         |
| 42        | T             | 11            | 11           | 0             | 0:09.32                         |
| 43        | T             | 11            | 11           | 0             | 0:09.47                         |
| 44        | T             | 11            | 11           | 0             | 0:09.44                         |
| 45        | T             | 11            | 11           | 0             | 0:09.35                         |
| 46        | T             | 11            | 11           | 0             | 0:09.37                         |
| 47        | T             | 11            | 11           | 0             | 0:09.31                         |
| 48        | T             | 10            | 9            | 1             | 0:08.56                         |
| 49        | T             | 11            | 11           | 0             | 0:09.28                         |
| 50        | T             | 11            | 11           | 0             | 0:09.43                         |
| 51        | T             | 11            | 11           | 0             | 0:09.38                         |
| 52        | T             | 11            | 11           | 0             | 0:09.34                         |
| 53        | T             | 11            | 11           | 0             | 0:09.34                         |
| 54        | T             | 11            | 11           | 0             | 0:09.25                         |
| 55        | T             | 11            | 11           | 0             | 0:09.35                         |
| 56        | T             | 11            | 11           | 0             | 0:09.34                         |
| 57        | T             | 11            | 11           | 0             | 0:09.29                         |
| 58        | T             | 10            | 9            | 1             | 0:08.62                         |
| 59        | T             | 11            | 11           | 0             | 0:09.38                         |
| 60        | T             | 11            | 11           | 0             | 0:09.29                         |
| 61        | T             | 11            | 11           | 0             | 0:09.30                         |
| 62        | T             | 11            | 11           | 0             | 0:09.29                         |
| 63        | T             | 11            | 11           | 0             | 0:09.41                         |
| 64        | T             | 11            | 11           | 0             | 0:09.34                         |
| 65        | T             | 11            | 11           | 0             | 0:09.24                         |
| 66        | T             | 11            | 11           | 0             | 0:09.43                         |
| 67        | T             | 11            | 11           | 0             | 0:09.28                         |
| 68        | T             | 11            | 11           | 0             | 0:09.27                         |
| 69        | T             | 11            | 11           | 0             | 0:09.24                         |
| 70        | T             | 11            | 11           | 0             | 0:09.39                         |
| 71        | T             | 11            | 11           | 0             | 0:09.40                         |
| 72        | T             | 11            | 11           | 0             | 0:09.38                         |
| 73        | T             | 11            | 11           | 0             | 0:09.30                         |
| 74        | T             | 11            | 11           | 0             | 0:09.24                         |
| 75        | T             | 10            | 9            | 1             | 0:08.50                         |
| 76        | T             | 11            | 11           | 0             | 0:09.24                         |
| 77        | T             | 11            | 11           | 0             | 0:09.34                         |
| 78        | T             | 11            | 11           | 0             | 0:09.38                         |
| 79        | T             | 11            | 11           | 0             | 0:09.36                         |
| 80        | T             | 11            | 11           | 0             | 0:09.31                         |

| <b>Id</b> | <b>Result</b> | <b>#total</b> | <b>#true</b> | <b>#false</b> | <b>Execution time (min:sec)</b> |
|-----------|---------------|---------------|--------------|---------------|---------------------------------|
| 81        | T             | 11            | 11           | 0             | 0:09.28                         |
| 82        | T             | 11            | 11           | 0             | 0:09.39                         |
| 83        | T             | 11            | 11           | 0             | 0:09.25                         |
| 84        | T             | 11            | 11           | 0             | 0:09.39                         |
| 85        | T             | 11            | 11           | 0             | 0:09.29                         |
| 86        | T             | 11            | 11           | 0             | 0:09.37                         |
| 87        | T             | 11            | 11           | 0             | 0:09.46                         |
| 88        | T             | 11            | 11           | 0             | 0:09.31                         |
| 89        | T             | 11            | 11           | 0             | 0:09.29                         |
| 90        | T             | 11            | 11           | 0             | 0:09.27                         |
| 91        | T             | 11            | 11           | 0             | 0:09.31                         |
| 92        | T             | 11            | 11           | 0             | 0:09.31                         |
| 93        | T             | 11            | 11           | 0             | 0:09.44                         |
| 94        | T             | 11            | 11           | 0             | 0:09.46                         |
| 95        | T             | 11            | 11           | 0             | 0:09.22                         |
| 96        | T             | 11            | 11           | 0             | 0:09.27                         |
| 97        | T             | 11            | 11           | 0             | 0:09.23                         |
| 98        | T             | 11            | 11           | 0             | 0:09.35                         |
| 99        | T             | 11            | 11           | 0             | 0:09.45                         |
| 100       | T             | 11            | 11           | 0             | 0:09.35                         |
| 101       | T             | 11            | 11           | 0             | 0:09.40                         |
| 102       | T             | 11            | 11           | 0             | 0:09.28                         |
| 103       | T             | 11            | 11           | 0             | 0:09.95                         |
| 104       | T             | 11            | 11           | 0             | 0:09.29                         |
| 105       | T             | 11            | 11           | 0             | 0:09.26                         |
| 106       | T             | 11            | 11           | 0             | 0:09.21                         |
| 107       | T             | 11            | 11           | 0             | 0:09.41                         |
| 108       | T             | 11            | 11           | 0             | 0:09.41                         |
| 109       | T             | 11            | 11           | 0             | 0:09.14                         |
| 110       | T             | 11            | 11           | 0             | 0:09.45                         |
| 111       | T             | 11            | 11           | 0             | 0:09.33                         |
| 112       | T             | 11            | 11           | 0             | 0:09.12                         |
| 113       | T             | 11            | 11           | 0             | 0:09.22                         |
| 114       | T             | 11            | 11           | 0             | 0:09.28                         |
| 115       | T             | 11            | 11           | 0             | 0:09.33                         |
| 116       | T             | 11            | 11           | 0             | 0:09.22                         |
| 117       | T             | 11            | 11           | 0             | 0:09.35                         |
| 118       | T             | 11            | 11           | 0             | 0:09.34                         |
| 119       | T             | 11            | 11           | 0             | 0:09.31                         |
| 120       | T             | 11            | 11           | 0             | 0:09.39                         |
| 121       | T             | 11            | 11           | 0             | 0:09.39                         |
| 122       | T             | 10            | 9            | 1             | 0:08.62                         |
| 123       | T             | 11            | 11           | 0             | 0:09.53                         |
| 124       | T             | 11            | 11           | 0             | 0:09.30                         |
| 125       | T             | 10            | 9            | 1             | 0:08.62                         |
| 126       | T             | 11            | 11           | 0             | 0:09.34                         |
| 127       | T             | 11            | 11           | 0             | 0:09.43                         |
| 128       | T             | 11            | 11           | 0             | 0:09.44                         |

| <b>Id</b> | <b>Result</b> | <b>#total</b> | <b>#true</b> | <b>#false</b> | <b>Execution time (min:sec)</b> |
|-----------|---------------|---------------|--------------|---------------|---------------------------------|
| 129       | T             | 11            | 11           | 0             | 0:09.43                         |
| 130       | T             | 11            | 11           | 0             | 0:09.52                         |
| 131       | T             | 11            | 11           | 0             | 0:09.52                         |
| 132       | T             | 11            | 11           | 0             | 0:09.37                         |
| 133       | T             | 11            | 11           | 0             | 0:09.54                         |
| 134       | T             | 11            | 11           | 0             | 0:09.42                         |
| 135       | T             | 11            | 11           | 0             | 0:09.35                         |
| 136       | T             | 11            | 11           | 0             | 0:09.44                         |
| 137       | T             | 11            | 11           | 0             | 0:09.45                         |
| 138       | T             | 11            | 11           | 0             | 0:09.45                         |
| 139       | T             | 11            | 11           | 0             | 0:09.52                         |
| 140       | T             | 11            | 11           | 0             | 0:09.51                         |
| 141       | T             | 11            | 11           | 0             | 0:09.31                         |
| 142       | T             | 11            | 11           | 0             | 0:09.25                         |
| 143       | T             | 11            | 11           | 0             | 0:09.50                         |
| 144       | T             | 11            | 11           | 0             | 0:09.30                         |
| 145       | T             | 11            | 11           | 0             | 0:09.23                         |
| 146       | T             | 11            | 11           | 0             | 0:09.41                         |
| 147       | T             | 11            | 11           | 0             | 0:09.37                         |
| 148       | T             | 11            | 11           | 0             | 0:09.34                         |
| 149       | T             | 10            | 9            | 1             | 0:08.66                         |
| 150       | T             | 11            | 11           | 0             | 0:09.55                         |
| 151       | T             | 11            | 11           | 0             | 0:09.33                         |
| 152       | T             | 11            | 11           | 0             | 0:09.40                         |
| 153       | T             | 11            | 11           | 0             | 0:09.45                         |
| 154       | T             | 11            | 11           | 0             | 0:09.33                         |
| 155       | T             | 11            | 11           | 0             | 0:09.53                         |
| 156       | T             | 11            | 11           | 0             | 0:09.51                         |
| 157       | T             | 11            | 11           | 0             | 0:09.44                         |
| 158       | T             | 11            | 11           | 0             | 0:09.42                         |
| 159       | T             | 11            | 11           | 0             | 0:09.47                         |
| 160       | T             | 11            | 11           | 0             | 0:09.46                         |
| 161       | T             | 11            | 11           | 0             | 0:09.44                         |
| 162       | T             | 11            | 11           | 0             | 0:09.60                         |
| 163       | T             | 11            | 11           | 0             | 0:09.36                         |
| 164       | T             | 11            | 11           | 0             | 0:09.69                         |
| 165       | T             | 11            | 11           | 0             | 0:09.48                         |
| 166       | T             | 11            | 11           | 0             | 0:09.44                         |
| 167       | T             | 11            | 11           | 0             | 0:09.33                         |
| 168       | T             | 11            | 11           | 0             | 0:09.58                         |
| 169       | T             | 11            | 11           | 0             | 0:09.51                         |
| 170       | T             | 11            | 11           | 0             | 0:09.44                         |
| 171       | T             | 11            | 11           | 0             | 0:09.50                         |
| 172       | T             | 11            | 11           | 0             | 0:09.47                         |
| 173       | T             | 11            | 11           | 0             | 0:09.39                         |
| 174       | T             | 11            | 11           | 0             | 0:09.36                         |
| 175       | T             | 11            | 11           | 0             | 0:09.23                         |
| 176       | T             | 11            | 11           | 0             | 0:09.23                         |

| <b>Id</b> | <b>Result</b> | <b>#total</b> | <b>#true</b> | <b>#false</b> | <b>Execution time (min:sec)</b> |
|-----------|---------------|---------------|--------------|---------------|---------------------------------|
| 177       | T             | 11            | 11           | 0             | 0:09.22                         |
| 178       | T             | 11            | 11           | 0             | 0:09.28                         |
| 179       | T             | 11            | 11           | 0             | 0:09.41                         |
| 180       | T             | 11            | 11           | 0             | 0:09.32                         |
| 181       | T             | 11            | 11           | 0             | 0:09.43                         |
| 182       | T             | 11            | 11           | 0             | 0:09.29                         |
| 183       | T             | 11            | 11           | 0             | 0:09.39                         |
| 184       | T             | 11            | 11           | 0             | 0:09.26                         |
| 185       | T             | 11            | 11           | 0             | 0:09.29                         |
| 186       | T             | 11            | 11           | 0             | 0:09.31                         |
| 187       | T             | 11            | 11           | 0             | 0:09.48                         |
| 188       | T             | 11            | 11           | 0             | 0:09.28                         |
| 189       | T             | 11            | 11           | 0             | 0:09.43                         |
| 190       | T             | 11            | 11           | 0             | 0:09.39                         |
| 191       | T             | 11            | 11           | 0             | 0:09.40                         |
| 192       | T             | 11            | 11           | 0             | 0:09.34                         |
| 193       | T             | 11            | 11           | 0             | 0:09.23                         |
| 194       | T             | 11            | 11           | 0             | 0:09.34                         |
| 195       | T             | 11            | 11           | 0             | 0:09.30                         |
| 196       | T             | 11            | 11           | 0             | 0:09.34                         |
| 197       | T             | 11            | 11           | 0             | 0:09.28                         |
| 198       | T             | 11            | 11           | 0             | 0:09.31                         |
| 199       | T             | 11            | 11           | 0             | 0:09.25                         |
| 200       | T             | 11            | 11           | 0             | 0:09.47                         |
| 201       | T             | 11            | 11           | 0             | 0:09.24                         |
| 202       | T             | 11            | 11           | 0             | 0:09.23                         |
| 203       | T             | 11            | 11           | 0             | 0:09.29                         |
| 204       | T             | 11            | 11           | 0             | 0:09.32                         |
| 205       | T             | 11            | 11           | 0             | 0:09.25                         |
| 206       | T             | 11            | 11           | 0             | 0:09.30                         |
| 207       | T             | 11            | 11           | 0             | 0:09.28                         |
| 208       | T             | 11            | 11           | 0             | 0:09.25                         |
| 209       | T             | 11            | 11           | 0             | 0:09.20                         |
| 210       | T             | 11            | 11           | 0             | 0:09.23                         |
| 211       | T             | 11            | 11           | 0             | 0:09.13                         |
| 212       | T             | 11            | 11           | 0             | 0:09.31                         |
| 213       | T             | 11            | 11           | 0             | 0:09.25                         |
| 214       | T             | 11            | 11           | 0             | 0:09.31                         |
| 215       | T             | 11            | 11           | 0             | 0:09.17                         |
| 216       | T             | 11            | 11           | 0             | 0:09.35                         |
| 217       | T             | 11            | 11           | 0             | 0:09.27                         |
| 218       | T             | 11            | 11           | 0             | 0:09.38                         |
| 219       | T             | 10            | 9            | 1             | 0:08.54                         |
| 220       | T             | 11            | 11           | 0             | 0:09.24                         |
| 221       | T             | 10            | 9            | 1             | 0:08.49                         |
| 222       | T             | 11            | 11           | 0             | 0:09.15                         |
| 223       | T             | 11            | 11           | 0             | 0:09.53                         |
| 224       | T             | 11            | 11           | 0             | 0:09.30                         |

| <b>Id</b> | <b>Result</b> | <b>#total</b> | <b>#true</b> | <b>#false</b> | <b>Execution time (min:sec)</b> |
|-----------|---------------|---------------|--------------|---------------|---------------------------------|
| 225       | T             | 11            | 11           | 0             | 0:09.22                         |
| 226       | T             | 11            | 11           | 0             | 0:09.25                         |
| 227       | T             | 11            | 11           | 0             | 0:09.23                         |
| 228       | T             | 11            | 11           | 0             | 0:09.25                         |
| 229       | T             | 11            | 11           | 0             | 0:09.20                         |
| 230       | T             | 11            | 11           | 0             | 0:09.24                         |
| 231       | T             | 11            | 11           | 0             | 0:09.24                         |
| 232       | T             | 11            | 11           | 0             | 0:09.28                         |
| 233       | T             | 11            | 11           | 0             | 0:09.28                         |
| 234       | T             | 11            | 11           | 0             | 0:09.36                         |
| 235       | T             | 11            | 11           | 0             | 0:09.45                         |
| 236       | T             | 11            | 11           | 0             | 0:09.17                         |
| 237       | T             | 11            | 11           | 0             | 0:09.24                         |
| 238       | T             | 11            | 11           | 0             | 0:09.38                         |
| 239       | T             | 11            | 11           | 0             | 0:09.32                         |
| 240       | T             | 11            | 11           | 0             | 0:09.23                         |
| 241       | T             | 11            | 11           | 0             | 0:09.26                         |
| 242       | T             | 11            | 11           | 0             | 0:09.18                         |
| 243       | T             | 11            | 11           | 0             | 0:09.27                         |
| 244       | T             | 11            | 11           | 0             | 0:09.22                         |
| 245       | T             | 11            | 11           | 0             | 0:09.30                         |
| 246       | T             | 11            | 11           | 0             | 0:09.33                         |
| 247       | T             | 11            | 11           | 0             | 0:09.34                         |
| 248       | T             | 11            | 11           | 0             | 0:09.25                         |
| 249       | T             | 10            | 9            | 1             | 0:08.65                         |
| 250       | T             | 11            | 11           | 0             | 0:09.47                         |
| 251       | T             | 11            | 11           | 0             | 0:09.30                         |
| 252       | T             | 11            | 11           | 0             | 0:09.36                         |
| 253       | T             | 11            | 11           | 0             | 0:09.23                         |
| 254       | T             | 11            | 11           | 0             | 0:09.26                         |
| 255       | T             | 11            | 11           | 0             | 0:09.21                         |
| 256       | T             | 11            | 11           | 0             | 0:09.24                         |
| 257       | T             | 11            | 11           | 0             | 0:09.33                         |
| 258       | T             | 11            | 11           | 0             | 0:09.40                         |
| 259       | T             | 11            | 11           | 0             | 0:09.54                         |
| 260       | T             | 11            | 11           | 0             | 0:09.31                         |
| 261       | T             | 10            | 9            | 1             | 0:08.58                         |
| 262       | T             | 11            | 11           | 0             | 0:09.32                         |
| 263       | T             | 11            | 11           | 0             | 0:09.30                         |
| 264       | T             | 11            | 11           | 0             | 0:09.57                         |
| 265       | T             | 11            | 11           | 0             | 0:09.25                         |
| 266       | T             | 11            | 11           | 0             | 0:09.28                         |
| 267       | T             | 11            | 11           | 0             | 0:09.33                         |
| 268       | T             | 11            | 11           | 0             | 0:09.26                         |
| 269       | T             | 11            | 11           | 0             | 0:09.24                         |
| 270       | T             | 10            | 9            | 1             | 0:08.65                         |
| 271       | T             | 11            | 11           | 0             | 0:09.35                         |
| 272       | T             | 11            | 11           | 0             | 0:09.15                         |

| <b>Id</b> | <b>Result</b> | <b>#total</b> | <b>#true</b> | <b>#false</b> | <b>Execution time (min:sec)</b> |
|-----------|---------------|---------------|--------------|---------------|---------------------------------|
| 273       | T             | 11            | 11           | 0             | 0:09.25                         |
| 274       | T             | 11            | 11           | 0             | 0:09.33                         |
| 275       | T             | 11            | 11           | 0             | 0:09.26                         |
| 276       | T             | 11            | 11           | 0             | 0:09.22                         |
| 277       | T             | 11            | 11           | 0             | 0:09.23                         |
| 278       | T             | 11            | 11           | 0             | 0:09.21                         |
| 279       | T             | 11            | 11           | 0             | 0:09.32                         |
| 280       | T             | 11            | 11           | 0             | 0:09.35                         |
| 281       | T             | 11            | 11           | 0             | 0:09.27                         |
| 282       | T             | 11            | 11           | 0             | 0:09.32                         |
| 283       | T             | 11            | 11           | 0             | 0:09.35                         |
| 284       | T             | 11            | 11           | 0             | 0:09.51                         |
| 285       | T             | 11            | 11           | 0             | 0:09.32                         |
| 286       | T             | 11            | 11           | 0             | 0:09.27                         |
| 287       | T             | 11            | 11           | 0             | 0:09.32                         |
| 288       | T             | 11            | 11           | 0             | 0:09.29                         |
| 289       | T             | 11            | 11           | 0             | 0:09.23                         |
| 290       | T             | 11            | 11           | 0             | 0:09.34                         |
| 291       | T             | 11            | 11           | 0             | 0:09.39                         |
| 292       | T             | 11            | 11           | 0             | 0:09.24                         |
| 293       | T             | 11            | 11           | 0             | 0:09.24                         |
| 294       | T             | 11            | 11           | 0             | 0:09.28                         |
| 295       | T             | 11            | 11           | 0             | 0:09.28                         |
| 296       | T             | 11            | 11           | 0             | 0:09.12                         |
| 297       | T             | 11            | 11           | 0             | 0:09.22                         |
| 298       | T             | 11            | 11           | 0             | 0:09.18                         |
| 299       | T             | 10            | 9            | 1             | 0:08.57                         |
| 300       | T             | 10            | 9            | 1             | 0:08.50                         |
| 301       | T             | 11            | 11           | 0             | 0:09.26                         |
| 302       | T             | 11            | 11           | 0             | 0:09.30                         |
| 303       | T             | 11            | 11           | 0             | 0:09.25                         |
| 304       | T             | 11            | 11           | 0             | 0:09.28                         |
| 305       | T             | 11            | 11           | 0             | 0:09.22                         |
| 306       | T             | 11            | 11           | 0             | 0:09.20                         |
| 307       | T             | 11            | 11           | 0             | 0:09.27                         |
| 308       | T             | 11            | 11           | 0             | 0:09.33                         |
| 309       | T             | 11            | 11           | 0             | 0:09.35                         |
| 310       | T             | 11            | 11           | 0             | 0:09.33                         |
| 311       | T             | 11            | 11           | 0             | 0:09.21                         |
| 312       | T             | 11            | 11           | 0             | 0:09.32                         |
| 313       | T             | 11            | 11           | 0             | 0:09.26                         |
| 314       | T             | 11            | 11           | 0             | 0:09.29                         |
| 315       | T             | 11            | 11           | 0             | 0:09.31                         |
| 316       | T             | 11            | 11           | 0             | 0:09.35                         |
| 317       | T             | 11            | 11           | 0             | 0:09.23                         |
| 318       | T             | 11            | 11           | 0             | 0:09.41                         |
| 319       | T             | 11            | 11           | 0             | 0:09.29                         |
| 320       | T             | 11            | 11           | 0             | 0:09.25                         |



| <b>Id</b> | <b>Result</b> | <b>#total</b> | <b>#true</b> | <b>#false</b> | <b>Execution time (min:sec)</b> |
|-----------|---------------|---------------|--------------|---------------|---------------------------------|
| 321       | T             | 11            | 11           | 0             | 0:09.32                         |
| 322       | T             | 11            | 11           | 0             | 0:09.24                         |
| 323       | T             | 11            | 11           | 0             | 0:09.29                         |
| 324       | T             | 11            | 11           | 0             | 0:09.37                         |
| 325       | T             | 11            | 11           | 0             | 0:09.33                         |
| 326       | T             | 11            | 11           | 0             | 0:09.21                         |
| 327       | T             | 11            | 11           | 0             | 0:09.17                         |
| 328       | T             | 11            | 11           | 0             | 0:09.23                         |
| 329       | T             | 11            | 11           | 0             | 0:09.20                         |
| 330       | T             | 11            | 11           | 0             | 0:09.38                         |
| 331       | T             | 11            | 11           | 0             | 0:09.28                         |
| 332       | T             | 11            | 11           | 0             | 0:09.20                         |
| 333       | T             | 11            | 11           | 0             | 0:09.36                         |
| 334       | T             | 11            | 11           | 0             | 0:09.20                         |
| 335       | T             | 11            | 11           | 0             | 0:09.22                         |
| 336       | T             | 11            | 11           | 0             | 0:09.31                         |
| 337       | T             | 11            | 11           | 0             | 0:09.27                         |
| 338       | T             | 11            | 11           | 0             | 0:09.23                         |
| 339       | T             | 11            | 11           | 0             | 0:09.29                         |
| 340       | T             | 10            | 9            | 1             | 0:08.52                         |
| 341       | T             | 11            | 11           | 0             | 0:09.29                         |
| 342       | T             | 11            | 11           | 0             | 0:09.25                         |
| 343       | T             | 11            | 11           | 0             | 0:09.27                         |
| 344       | T             | 11            | 11           | 0             | 0:09.16                         |
| 345       | T             | 11            | 11           | 0             | 0:09.22                         |
| 346       | T             | 11            | 11           | 0             | 0:09.36                         |
| 347       | T             | 11            | 11           | 0             | 0:09.39                         |
| 348       | T             | 11            | 11           | 0             | 0:09.26                         |
| 349       | T             | 11            | 11           | 0             | 0:09.18                         |
| 350       | T             | 11            | 11           | 0             | 0:09.26                         |
| 351       | T             | 11            | 11           | 0             | 0:09.17                         |
| 352       | T             | 11            | 11           | 0             | 0:09.20                         |
| 353       | T             | 11            | 11           | 0             | 0:09.30                         |
| 354       | T             | 11            | 11           | 0             | 0:09.22                         |
| 355       | T             | 11            | 11           | 0             | 0:09.20                         |
| 356       | T             | 11            | 11           | 0             | 0:09.22                         |
| 357       | T             | 11            | 11           | 0             | 0:09.31                         |
| 358       | T             | 11            | 11           | 0             | 0:09.26                         |
| 359       | T             | 11            | 11           | 0             | 0:09.25                         |
| 360       | T             | 11            | 11           | 0             | 0:09.15                         |
| 361       | T             | 11            | 11           | 0             | 0:09.18                         |
| 362       | T             | 11            | 11           | 0             | 0:09.19                         |
| 363       | T             | 11            | 11           | 0             | 0:09.22                         |
| 364       | T             | 11            | 11           | 0             | 0:09.27                         |
| 365       | T             | 10            | 9            | 1             | 0:08.46                         |
| 366       | T             | 11            | 11           | 0             | 0:09.28                         |
| 367       | T             | 11            | 11           | 0             | 0:09.23                         |
| 368       | T             | 11            | 11           | 0             | 0:09.19                         |

| <b>Id</b> | <b>Result</b> | <b>#total</b> | <b>#true</b> | <b>#false</b> | <b>Execution time (min:sec)</b> |
|-----------|---------------|---------------|--------------|---------------|---------------------------------|
| 369       | T             | 11            | 11           | 0             | 0:09.25                         |
| 370       | T             | 11            | 11           | 0             | 0:09.22                         |
| 371       | T             | 11            | 11           | 0             | 0:09.22                         |
| 372       | T             | 11            | 11           | 0             | 0:09.28                         |
| 373       | T             | 11            | 11           | 0             | 0:09.22                         |
| 374       | T             | 11            | 11           | 0             | 0:09.22                         |
| 375       | T             | 11            | 11           | 0             | 0:09.27                         |
| 376       | T             | 11            | 11           | 0             | 0:09.26                         |
| 377       | T             | 11            | 11           | 0             | 0:09.17                         |
| 378       | T             | 11            | 11           | 0             | 0:09.23                         |
| 379       | T             | 11            | 11           | 0             | 0:09.28                         |
| 380       | T             | 11            | 11           | 0             | 0:09.26                         |
| 381       | T             | 11            | 11           | 0             | 0:09.28                         |
| 382       | T             | 11            | 11           | 0             | 0:09.24                         |
| 383       | T             | 11            | 11           | 0             | 0:09.16                         |
| 384       | T             | 11            | 11           | 0             | 0:09.25                         |
| 385       | T             | 11            | 11           | 0             | 0:09.26                         |
| 386       | T             | 11            | 11           | 0             | 0:09.28                         |
| 387       | T             | 11            | 11           | 0             | 0:09.24                         |
| 388       | T             | 11            | 11           | 0             | 0:09.18                         |
| 389       | T             | 11            | 11           | 0             | 0:09.34                         |
| 390       | T             | 11            | 11           | 0             | 0:09.25                         |
| 391       | T             | 11            | 11           | 0             | 0:09.23                         |
| 392       | T             | 11            | 11           | 0             | 0:09.16                         |
| 393       | T             | 11            | 11           | 0             | 0:09.22                         |
| 394       | T             | 11            | 11           | 0             | 0:09.19                         |
| 395       | T             | 11            | 11           | 0             | 0:09.22                         |
| 396       | T             | 11            | 11           | 0             | 0:09.32                         |
| 397       | T             | 11            | 11           | 0             | 0:09.28                         |
| 398       | T             | 11            | 11           | 0             | 0:09.22                         |
| 399       | T             | 11            | 11           | 0             | 0:09.17                         |
| 400       | T             | 11            | 11           | 0             | 0:09.51                         |
| 401       | T             | 11            | 11           | 0             | 0:09.46                         |
| 402       | T             | 11            | 11           | 0             | 0:09.19                         |
| 403       | T             | 11            | 11           | 0             | 0:09.17                         |
| 404       | T             | 11            | 11           | 0             | 0:09.26                         |
| 405       | T             | 11            | 11           | 0             | 0:09.29                         |
| 406       | T             | 11            | 11           | 0             | 0:09.27                         |
| 407       | T             | 11            | 11           | 0             | 0:09.28                         |
| 408       | T             | 11            | 11           | 0             | 0:09.26                         |
| 409       | T             | 11            | 11           | 0             | 0:09.28                         |
| 410       | T             | 11            | 11           | 0             | 0:09.24                         |
| 411       | T             | 11            | 11           | 0             | 0:09.23                         |
| 412       | T             | 11            | 11           | 0             | 0:09.21                         |
| 413       | T             | 11            | 11           | 0             | 0:09.18                         |
| 414       | T             | 11            | 11           | 0             | 0:09.23                         |
| 415       | T             | 11            | 11           | 0             | 0:09.31                         |
| 416       | T             | 11            | 11           | 0             | 0:09.23                         |

| <b>Id</b> | <b>Result</b> | <b>#total</b> | <b>#true</b> | <b>#false</b> | <b>Execution time (min:sec)</b> |
|-----------|---------------|---------------|--------------|---------------|---------------------------------|
| 417       | T             | 11            | 11           | 0             | 0:09.20                         |
| 418       | T             | 11            | 11           | 0             | 0:09.27                         |
| 419       | T             | 11            | 11           | 0             | 0:09.10                         |
| 420       | T             | 11            | 11           | 0             | 0:09.22                         |
| 421       | T             | 11            | 11           | 0             | 0:09.21                         |
| 422       | T             | 11            | 11           | 0             | 0:09.22                         |
| 423       | T             | 11            | 11           | 0             | 0:09.26                         |
| 424       | T             | 11            | 11           | 0             | 0:09.29                         |
| 425       | T             | 11            | 11           | 0             | 0:09.19                         |
| 426       | T             | 11            | 11           | 0             | 0:09.18                         |
| 427       | T             | 11            | 11           | 0             | 0:09.23                         |
| 428       | T             | 11            | 11           | 0             | 0:09.22                         |
| 429       | T             | 11            | 11           | 0             | 0:09.24                         |
| 430       | T             | 11            | 11           | 0             | 0:09.18                         |
| 431       | T             | 11            | 11           | 0             | 0:09.15                         |
| 432       | T             | 11            | 11           | 0             | 0:09.27                         |
| 433       | T             | 11            | 11           | 0             | 0:09.20                         |
| 434       | T             | 11            | 11           | 0             | 0:09.24                         |
| 435       | T             | 11            | 11           | 0             | 0:09.19                         |
| 436       | T             | 11            | 11           | 0             | 0:09.15                         |
| 437       | T             | 11            | 11           | 0             | 0:09.21                         |
| 438       | T             | 11            | 11           | 0             | 0:09.17                         |
| 439       | T             | 11            | 11           | 0             | 0:09.22                         |
| 440       | T             | 11            | 11           | 0             | 0:09.25                         |
| 441       | T             | 11            | 11           | 0             | 0:09.21                         |
| 442       | T             | 11            | 11           | 0             | 0:09.21                         |
| 443       | T             | 11            | 11           | 0             | 0:09.33                         |
| 444       | T             | 11            | 11           | 0             | 0:09.23                         |
| 445       | T             | 11            | 11           | 0             | 0:09.25                         |
| 446       | T             | 11            | 11           | 0             | 0:09.21                         |
| 447       | T             | 11            | 11           | 0             | 0:09.23                         |
| 448       | T             | 11            | 11           | 0             | 0:09.31                         |
| 449       | T             | 11            | 11           | 0             | 0:09.36                         |
| 450       | T             | 11            | 11           | 0             | 0:09.14                         |
| 451       | T             | 11            | 11           | 0             | 0:09.19                         |
| 452       | T             | 11            | 11           | 0             | 0:09.19                         |
| 453       | T             | 11            | 11           | 0             | 0:09.24                         |
| 454       | T             | 11            | 11           | 0             | 0:09.17                         |
| 455       | T             | 11            | 11           | 0             | 0:09.26                         |
| 456       | T             | 11            | 11           | 0             | 0:09.22                         |
| 457       | T             | 11            | 11           | 0             | 0:09.17                         |
| 458       | T             | 11            | 11           | 0             | 0:09.13                         |
| 459       | T             | 11            | 11           | 0             | 0:09.30                         |
| 460       | T             | 11            | 11           | 0             | 0:09.24                         |
| 461       | T             | 11            | 11           | 0             | 0:09.28                         |
| 462       | T             | 11            | 11           | 0             | 0:09.32                         |
| 463       | T             | 11            | 11           | 0             | 0:09.24                         |
| 464       | T             | 11            | 11           | 0             | 0:09.18                         |

| <b>Id</b> | <b>Result</b> | <b>#total</b> | <b>#true</b> | <b>#false</b> | <b>Execution time (min:sec)</b> |
|-----------|---------------|---------------|--------------|---------------|---------------------------------|
| 465       | T             | 11            | 11           | 0             | 0:09.27                         |
| 466       | T             | 11            | 11           | 0             | 0:09.29                         |
| 467       | T             | 11            | 11           | 0             | 0:09.19                         |
| 468       | T             | 11            | 11           | 0             | 0:09.20                         |
| 469       | T             | 11            | 11           | 0             | 0:09.19                         |
| 470       | T             | 11            | 11           | 0             | 0:09.22                         |
| 471       | T             | 11            | 11           | 0             | 0:09.28                         |
| 472       | T             | 11            | 11           | 0             | 0:09.29                         |
| 473       | T             | 11            | 11           | 0             | 0:09.32                         |
| 474       | T             | 11            | 11           | 0             | 0:09.24                         |
| 475       | T             | 11            | 11           | 0             | 0:09.27                         |
| 476       | T             | 11            | 11           | 0             | 0:09.25                         |
| 477       | T             | 11            | 11           | 0             | 0:09.24                         |
| 478       | T             | 11            | 11           | 0             | 0:09.20                         |
| 479       | T             | 11            | 11           | 0             | 0:09.26                         |
| 480       | T             | 11            | 11           | 0             | 0:09.22                         |
| 481       | T             | 11            | 11           | 0             | 0:09.30                         |
| 482       | T             | 11            | 11           | 0             | 0:09.29                         |
| 483       | T             | 11            | 11           | 0             | 0:09.28                         |
| 484       | T             | 11            | 11           | 0             | 0:09.27                         |
| 485       | T             | 11            | 11           | 0             | 0:09.22                         |
| 486       | T             | 11            | 11           | 0             | 0:09.29                         |
| 487       | T             | 11            | 11           | 0             | 0:09.29                         |
| 488       | T             | 11            | 11           | 0             | 0:09.26                         |
| 489       | T             | 11            | 11           | 0             | 0:09.26                         |
| 490       | T             | 11            | 11           | 0             | 0:09.27                         |
| 491       | T             | 11            | 11           | 0             | 0:09.15                         |
| 492       | T             | 11            | 11           | 0             | 0:09.29                         |
| 493       | T             | 11            | 11           | 0             | 0:09.28                         |
| 494       | T             | 11            | 11           | 0             | 0:09.25                         |
| 495       | T             | 11            | 11           | 0             | 0:09.19                         |
| 496       | T             | 11            | 11           | 0             | 0:09.23                         |
| 497       | T             | 11            | 11           | 0             | 0:09.29                         |
| 498       | T             | 11            | 11           | 0             | 0:09.33                         |
| 499       | T             | 11            | 11           | 0             | 0:09.17                         |
| 500       | T             | 11            | 11           | 0             | 0:09.20                         |

Table 5: Model checking results corresponding to logic property 13

| <b>Id</b> | <b>Result</b> | <b>#total</b> | <b>#true</b> | <b>#false</b> | <b>Execution time (min:sec)</b> |
|-----------|---------------|---------------|--------------|---------------|---------------------------------|
| 1         | T             | 6             | 5            | 1             | 0:05.39                         |
| 2         | T             | 16            | 8            | 8             | 0:13.04                         |
| 3         | T             | 10            | 6            | 4             | 0:08.42                         |
| 4         | T             | 5             | 4            | 1             | 0:04.64                         |
| 5         | T             | 8             | 5            | 3             | 0:06.84                         |

| <b>Id</b> | <b>Result</b> | <b>#total</b> | <b>#true</b> | <b>#false</b> | <b>Execution time (min:sec)</b> |
|-----------|---------------|---------------|--------------|---------------|---------------------------------|
| 6         | F             | 14            | 3            | 11            | 0:11.49                         |
| 7         | T             | 6             | 4            | 2             | 0:05.38                         |
| 8         | T             | 5             | 4            | 1             | 0:04.61                         |
| 9         | T             | 5             | 4            | 1             | 0:04.63                         |
| 10        | T             | 23            | 11           | 12            | 0:18.21                         |
| 11        | T             | 10            | 6            | 4             | 0:08.41                         |
| 12        | T             | 5             | 4            | 1             | 0:04.61                         |
| 13        | T             | 11            | 6            | 5             | 0:09.15                         |
| 14        | T             | 11            | 6            | 5             | 0:09.15                         |
| 15        | F             | 455           | 243          | 212           | 5:45.09                         |
| 16        | T             | 5             | 4            | 1             | 0:04.58                         |
| 17        | T             | 10            | 6            | 4             | 0:08.44                         |
| 18        | T             | 5             | 4            | 1             | 0:04.56                         |
| 19        | T             | 8             | 5            | 3             | 0:06.84                         |
| 20        | T             | 11            | 6            | 5             | 0:09.22                         |
| 21        | T             | 6             | 5            | 1             | 0:05.36                         |
| 22        | T             | 11            | 6            | 5             | 0:09.13                         |
| 23        | T             | 5             | 4            | 1             | 0:04.63                         |
| 24        | T             | 18            | 9            | 9             | 0:14.54                         |
| 25        | T             | 5             | 4            | 1             | 0:04.58                         |
| 26        | T             | 24            | 11           | 13            | 0:19.11                         |
| 27        | T             | 11            | 6            | 5             | 0:09.14                         |
| 28        | T             | 5             | 4            | 1             | 0:04.61                         |
| 29        | T             | 16            | 8            | 8             | 0:12.92                         |
| 30        | T             | 10            | 6            | 4             | 0:08.36                         |
| 31        | T             | 13            | 7            | 6             | 0:10.63                         |
| 32        | T             | 6             | 6            | 0             | 0:05.37                         |
| 33        | T             | 6             | 4            | 2             | 0:05.35                         |
| 34        | T             | 19            | 9            | 10            | 0:15.16                         |
| 35        | T             | 5             | 4            | 1             | 0:04.64                         |
| 36        | T             | 5             | 4            | 1             | 0:04.64                         |
| 37        | T             | 13            | 7            | 6             | 0:10.68                         |
| 38        | T             | 6             | 4            | 2             | 0:05.34                         |
| 39        | T             | 16            | 8            | 8             | 0:12.92                         |
| 40        | T             | 11            | 6            | 5             | 0:09.17                         |
| 41        | T             | 6             | 5            | 1             | 0:05.34                         |
| 42        | T             | 6             | 4            | 2             | 0:05.38                         |
| 43        | T             | 5             | 4            | 1             | 0:04.63                         |
| 44        | T             | 5             | 4            | 1             | 0:04.60                         |
| 45        | T             | 5             | 4            | 1             | 0:04.64                         |
| 46        | T             | 5             | 4            | 1             | 0:04.57                         |
| 47        | F             | 1077          | 605          | 472           | 13:34.64                        |
| 48        | T             | 6             | 4            | 2             | 0:05.41                         |
| 49        | F             | 526           | 288          | 238           | 6:38.02                         |
| 50        | F             | 16            | 4            | 12            | 0:12.94                         |
| 51        | T             | 18            | 9            | 9             | 0:14.55                         |
| 52        | T             | 8             | 5            | 3             | 0:06.85                         |
| 53        | T             | 5             | 4            | 1             | 0:04.60                         |

| <b>Id</b> | <b>Result</b> | <b>#total</b> | <b>#true</b> | <b>#false</b> | <b>Execution time (min:sec)</b> |
|-----------|---------------|---------------|--------------|---------------|---------------------------------|
| 54        | T             | 6             | 4            | 2             | 0:05.33                         |
| 55        | T             | 10            | 6            | 4             | 0:08.42                         |
| 56        | T             | 8             | 5            | 3             | 0:06.87                         |
| 57        | T             | 24            | 11           | 13            | 0:19.04                         |
| 58        | F             | 10            | 1            | 9             | 0:08.46                         |
| 59        | T             | 13            | 7            | 6             | 0:10.65                         |
| 60        | T             | 6             | 4            | 2             | 0:05.33                         |
| 61        | T             | 6             | 4            | 2             | 0:05.36                         |
| 62        | T             | 6             | 4            | 2             | 0:05.34                         |
| 63        | T             | 11            | 6            | 5             | 0:09.10                         |
| 64        | T             | 5             | 4            | 1             | 0:04.59                         |
| 65        | T             | 26            | 12           | 14            | 0:20.60                         |
| 66        | T             | 16            | 8            | 8             | 0:12.82                         |
| 67        | T             | 6             | 4            | 2             | 0:05.32                         |
| 68        | T             | 5             | 4            | 1             | 0:04.63                         |
| 69        | T             | 5             | 4            | 1             | 0:04.59                         |
| 70        | T             | 8             | 5            | 3             | 0:06.87                         |
| 71        | T             | 13            | 7            | 6             | 0:10.70                         |
| 72        | T             | 5             | 4            | 1             | 0:04.68                         |
| 73        | T             | 6             | 4            | 2             | 0:05.30                         |
| 74        | T             | 11            | 6            | 5             | 0:09.22                         |
| 75        | T             | 31            | 14           | 17            | 0:24.28                         |
| 76        | T             | 6             | 4            | 2             | 0:05.35                         |
| 77        | F             | 14            | 3            | 11            | 0:11.48                         |
| 78        | T             | 6             | 4            | 2             | 0:05.32                         |
| 79        | T             | 16            | 8            | 8             | 0:13.03                         |
| 80        | T             | 6             | 4            | 2             | 0:05.35                         |
| 81        | T             | 5             | 4            | 1             | 0:04.63                         |
| 82        | T             | 10            | 6            | 4             | 0:08.38                         |
| 83        | T             | 5             | 4            | 1             | 0:04.63                         |
| 84        | T             | 5             | 4            | 1             | 0:04.57                         |
| 85        | T             | 16            | 8            | 8             | 0:12.94                         |
| 86        | T             | 6             | 4            | 2             | 0:05.36                         |
| 87        | T             | 5             | 4            | 1             | 0:04.59                         |
| 88        | T             | 8             | 5            | 3             | 0:06.89                         |
| 89        | T             | 5             | 4            | 1             | 0:04.61                         |
| 90        | T             | 6             | 4            | 2             | 0:05.33                         |
| 91        | T             | 15            | 8            | 7             | 0:12.24                         |
| 92        | T             | 13            | 7            | 6             | 0:10.75                         |
| 93        | T             | 8             | 5            | 3             | 0:06.79                         |
| 94        | T             | 24            | 11           | 13            | 0:19.04                         |
| 95        | T             | 28            | 13           | 15            | 0:22.08                         |
| 96        | T             | 19            | 9            | 10            | 0:15.22                         |
| 97        | T             | 21            | 10           | 11            | 0:16.75                         |
| 98        | T             | 5             | 4            | 1             | 0:04.61                         |
| 99        | T             | 8             | 5            | 3             | 0:07.40                         |
| 100       | T             | 11            | 6            | 5             | 0:09.14                         |
| 101       | T             | 5             | 4            | 1             | 0:04.57                         |

| <b>Id</b> | <b>Result</b> | <b>#total</b> | <b>#true</b> | <b>#false</b> | <b>Execution time (min:sec)</b> |
|-----------|---------------|---------------|--------------|---------------|---------------------------------|
| 102       | T             | 11            | 6            | 5             | 0:09.20                         |
| 103       | T             | 6             | 4            | 2             | 0:05.35                         |
| 104       | T             | 6             | 4            | 2             | 0:05.39                         |
| 105       | T             | 11            | 6            | 5             | 0:09.12                         |
| 106       | T             | 6             | 4            | 2             | 0:05.35                         |
| 107       | T             | 5             | 4            | 1             | 0:04.62                         |
| 108       | T             | 5             | 4            | 1             | 0:04.57                         |
| 109       | T             | 5             | 4            | 1             | 0:04.62                         |
| 110       | T             | 10            | 6            | 4             | 0:08.37                         |
| 111       | T             | 10            | 6            | 4             | 0:08.43                         |
| 112       | T             | 11            | 6            | 5             | 0:09.15                         |
| 113       | T             | 6             | 4            | 2             | 0:05.35                         |
| 114       | T             | 16            | 8            | 8             | 0:13.03                         |
| 115       | T             | 11            | 6            | 5             | 0:09.22                         |
| 116       | T             | 6             | 4            | 2             | 0:05.32                         |
| 117       | T             | 5             | 4            | 1             | 0:04.64                         |
| 118       | T             | 15            | 8            | 7             | 0:12.14                         |
| 119       | T             | 6             | 6            | 0             | 0:05.34                         |
| 120       | T             | 5             | 4            | 1             | 0:04.59                         |
| 121       | T             | 8             | 5            | 3             | 0:06.86                         |
| 122       | T             | 10            | 6            | 4             | 0:08.42                         |
| 123       | T             | 6             | 4            | 2             | 0:05.37                         |
| 124       | T             | 16            | 8            | 8             | 0:13.00                         |
| 125       | T             | 19            | 9            | 10            | 0:15.28                         |
| 126       | T             | 23            | 11           | 12            | 0:18.31                         |
| 127       | T             | 5             | 4            | 1             | 0:04.62                         |
| 128       | T             | 5             | 4            | 1             | 0:04.62                         |
| 129       | F             | 12            | 2            | 10            | 0:09.99                         |
| 130       | T             | 19            | 9            | 10            | 0:15.21                         |
| 131       | T             | 8             | 5            | 3             | 0:06.89                         |
| 132       | T             | 28            | 13           | 15            | 0:22.03                         |
| 133       | T             | 6             | 4            | 2             | 0:05.40                         |
| 134       | T             | 6             | 4            | 2             | 0:05.35                         |
| 135       | T             | 6             | 4            | 2             | 0:05.39                         |
| 136       | T             | 5             | 4            | 1             | 0:04.61                         |
| 137       | T             | 5             | 4            | 1             | 0:04.60                         |
| 138       | T             | 6             | 4            | 2             | 0:05.40                         |
| 139       | T             | 19            | 9            | 10            | 0:15.13                         |
| 140       | T             | 18            | 9            | 9             | 0:14.57                         |
| 141       | T             | 5             | 4            | 1             | 0:04.59                         |
| 142       | T             | 11            | 6            | 5             | 0:09.18                         |
| 143       | T             | 5             | 4            | 1             | 0:04.61                         |
| 144       | T             | 6             | 4            | 2             | 0:05.37                         |
| 145       | T             | 8             | 5            | 3             | 0:06.89                         |
| 146       | T             | 5             | 4            | 1             | 0:04.59                         |
| 147       | T             | 11            | 6            | 5             | 0:09.20                         |
| 148       | T             | 5             | 4            | 1             | 0:04.64                         |
| 149       | T             | 6             | 6            | 0             | 0:05.35                         |

| <b>Id</b> | <b>Result</b> | <b>#total</b> | <b>#true</b> | <b>#false</b> | <b>Execution time (min:sec)</b> |
|-----------|---------------|---------------|--------------|---------------|---------------------------------|
| 150       | T             | 24            | 11           | 13            | 0:19.00                         |
| 151       | T             | 6             | 4            | 2             | 0:05.34                         |
| 152       | T             | 5             | 4            | 1             | 0:04.63                         |
| 153       | T             | 16            | 8            | 8             | 0:12.90                         |
| 154       | T             | 6             | 4            | 2             | 0:05.35                         |
| 155       | T             | 24            | 11           | 13            | 0:19.08                         |
| 156       | T             | 6             | 4            | 2             | 0:05.36                         |
| 157       | T             | 13            | 7            | 6             | 0:10.74                         |
| 158       | T             | 28            | 13           | 15            | 0:22.11                         |
| 159       | T             | 5             | 4            | 1             | 0:04.58                         |
| 160       | T             | 6             | 6            | 0             | 0:05.33                         |
| 161       | F             | 20            | 6            | 14            | 0:16.00                         |
| 162       | T             | 11            | 6            | 5             | 0:09.21                         |
| 163       | T             | 16            | 8            | 8             | 0:12.94                         |
| 164       | T             | 10            | 6            | 4             | 0:08.39                         |
| 165       | T             | 5             | 4            | 1             | 0:04.60                         |
| 166       | T             | 6             | 6            | 0             | 0:05.36                         |
| 167       | T             | 5             | 4            | 1             | 0:04.63                         |
| 168       | T             | 5             | 4            | 1             | 0:04.57                         |
| 169       | T             | 33            | 15           | 18            | 0:25.93                         |
| 170       | F             | 10            | 1            | 9             | 0:08.37                         |
| 171       | T             | 19            | 9            | 10            | 0:15.29                         |
| 172       | T             | 11            | 6            | 5             | 0:09.20                         |
| 173       | T             | 19            | 9            | 10            | 0:15.30                         |
| 174       | T             | 10            | 6            | 4             | 0:08.48                         |
| 175       | T             | 5             | 4            | 1             | 0:04.61                         |
| 176       | T             | 6             | 4            | 2             | 0:05.42                         |
| 177       | T             | 5             | 4            | 1             | 0:04.60                         |
| 178       | T             | 5             | 4            | 1             | 0:04.57                         |
| 179       | T             | 11            | 6            | 5             | 0:09.17                         |
| 180       | T             | 5             | 4            | 1             | 0:04.62                         |
| 181       | T             | 24            | 11           | 13            | 0:19.00                         |
| 182       | T             | 8             | 5            | 3             | 0:06.88                         |
| 183       | T             | 5             | 4            | 1             | 0:04.58                         |
| 184       | T             | 6             | 4            | 2             | 0:05.31                         |
| 185       | T             | 6             | 4            | 2             | 0:05.40                         |
| 186       | T             | 29            | 13           | 16            | 0:22.84                         |
| 187       | T             | 5             | 4            | 1             | 0:04.60                         |
| 188       | T             | 6             | 4            | 2             | 0:05.40                         |
| 189       | T             | 5             | 4            | 1             | 0:04.57                         |
| 190       | T             | 11            | 6            | 5             | 0:09.13                         |
| 191       | T             | 5             | 4            | 1             | 0:04.62                         |
| 192       | T             | 5             | 4            | 1             | 0:04.58                         |
| 193       | T             | 6             | 4            | 2             | 0:05.35                         |
| 194       | T             | 8             | 5            | 3             | 0:06.88                         |
| 195       | T             | 8             | 5            | 3             | 0:06.87                         |
| 196       | T             | 6             | 4            | 2             | 0:05.36                         |
| 197       | T             | 18            | 9            | 9             | 0:14.42                         |



| <b>Id</b> | <b>Result</b> | <b>#total</b> | <b>#true</b> | <b>#false</b> | <b>Execution time (min:sec)</b> |
|-----------|---------------|---------------|--------------|---------------|---------------------------------|
| 198       | F             | 14            | 3            | 11            | 0:11.43                         |
| 199       | T             | 10            | 6            | 4             | 0:08.36                         |
| 200       | T             | 6             | 4            | 2             | 0:05.38                         |
| 201       | T             | 6             | 4            | 2             | 0:05.38                         |
| 202       | T             | 10            | 6            | 4             | 0:08.42                         |
| 203       | T             | 6             | 4            | 2             | 0:05.34                         |
| 204       | T             | 18            | 9            | 9             | 0:14.46                         |
| 205       | T             | 6             | 4            | 2             | 0:05.35                         |
| 206       | T             | 5             | 4            | 1             | 0:04.63                         |
| 207       | T             | 23            | 11           | 12            | 0:18.36                         |
| 208       | T             | 10            | 6            | 4             | 0:08.38                         |
| 209       | T             | 11            | 6            | 5             | 0:09.17                         |
| 210       | T             | 15            | 8            | 7             | 0:12.19                         |
| 211       | T             | 11            | 6            | 5             | 0:09.17                         |
| 212       | T             | 10            | 6            | 4             | 0:08.48                         |
| 213       | T             | 5             | 4            | 1             | 0:04.63                         |
| 214       | T             | 6             | 4            | 2             | 0:05.34                         |
| 215       | T             | 6             | 6            | 0             | 0:05.31                         |
| 216       | T             | 6             | 4            | 2             | 0:05.37                         |
| 217       | T             | 5             | 4            | 1             | 0:04.61                         |
| 218       | T             | 5             | 4            | 1             | 0:04.56                         |
| 219       | T             | 6             | 6            | 0             | 0:05.34                         |
| 220       | T             | 6             | 4            | 2             | 0:05.35                         |
| 221       | T             | 24            | 11           | 13            | 0:19.06                         |
| 222       | T             | 11            | 6            | 5             | 0:09.19                         |
| 223       | T             | 6             | 4            | 2             | 0:05.41                         |
| 224       | T             | 10            | 6            | 4             | 0:08.50                         |
| 225       | T             | 6             | 4            | 2             | 0:05.35                         |
| 226       | T             | 5             | 4            | 1             | 0:04.64                         |
| 227       | T             | 5             | 4            | 1             | 0:04.60                         |
| 228       | T             | 5             | 4            | 1             | 0:04.61                         |
| 229       | F             | 41            | 14           | 27            | 0:32.03                         |
| 230       | T             | 15            | 8            | 7             | 0:12.20                         |
| 231       | T             | 24            | 11           | 13            | 0:19.14                         |
| 232       | T             | 6             | 4            | 2             | 0:05.39                         |
| 233       | T             | 6             | 4            | 2             | 0:05.40                         |
| 234       | T             | 18            | 9            | 9             | 0:14.52                         |
| 235       | T             | 8             | 5            | 3             | 0:06.83                         |
| 236       | T             | 5             | 4            | 1             | 0:04.61                         |
| 237       | T             | 19            | 9            | 10            | 0:15.22                         |
| 238       | F             | 18            | 5            | 13            | 0:14.47                         |
| 239       | T             | 6             | 4            | 2             | 0:05.38                         |
| 240       | T             | 5             | 4            | 1             | 0:04.59                         |
| 241       | T             | 5             | 4            | 1             | 0:04.62                         |
| 242       | T             | 6             | 4            | 2             | 0:05.41                         |
| 243       | T             | 13            | 7            | 6             | 0:10.63                         |
| 244       | T             | 13            | 7            | 6             | 0:10.68                         |
| 245       | T             | 15            | 8            | 7             | 0:12.21                         |

| <b>Id</b> | <b>Result</b> | <b>#total</b> | <b>#true</b> | <b>#false</b> | <b>Execution time (min:sec)</b> |
|-----------|---------------|---------------|--------------|---------------|---------------------------------|
| 246       | T             | 6             | 4            | 2             | 0:05.32                         |
| 247       | T             | 13            | 7            | 6             | 0:10.68                         |
| 248       | T             | 13            | 7            | 6             | 0:10.66                         |
| 249       | T             | 8             | 5            | 3             | 0:07.30                         |
| 250       | T             | 11            | 6            | 5             | 0:09.16                         |
| 251       | T             | 6             | 5            | 1             | 0:05.35                         |
| 252       | T             | 5             | 4            | 1             | 0:04.58                         |
| 253       | T             | 6             | 4            | 2             | 0:05.39                         |
| 254       | T             | 21            | 10           | 11            | 0:16.72                         |
| 255       | T             | 6             | 4            | 2             | 0:05.33                         |
| 256       | T             | 6             | 4            | 2             | 0:05.36                         |
| 257       | T             | 8             | 5            | 3             | 0:06.87                         |
| 258       | T             | 10            | 6            | 4             | 0:08.36                         |
| 259       | T             | 23            | 11           | 12            | 0:18.30                         |
| 260       | T             | 8             | 5            | 3             | 0:06.91                         |
| 261       | T             | 10            | 6            | 4             | 0:08.51                         |
| 262       | T             | 11            | 6            | 5             | 0:09.20                         |
| 263       | T             | 5             | 4            | 1             | 0:04.61                         |
| 264       | T             | 5             | 4            | 1             | 0:04.59                         |
| 265       | T             | 5             | 4            | 1             | 0:04.58                         |
| 266       | T             | 11            | 6            | 5             | 0:09.16                         |
| 267       | T             | 8             | 5            | 3             | 0:06.82                         |
| 268       | T             | 23            | 11           | 12            | 0:18.25                         |
| 269       | T             | 6             | 4            | 2             | 0:05.36                         |
| 270       | T             | 16            | 8            | 8             | 0:12.97                         |
| 271       | T             | 6             | 4            | 2             | 0:05.34                         |
| 272       | T             | 5             | 4            | 1             | 0:04.61                         |
| 273       | T             | 8             | 5            | 3             | 0:06.86                         |
| 274       | T             | 8             | 5            | 3             | 0:06.86                         |
| 275       | T             | 6             | 4            | 2             | 0:05.36                         |
| 276       | T             | 34            | 15           | 19            | 0:26.57                         |
| 277       | T             | 10            | 6            | 4             | 0:08.40                         |
| 278       | T             | 15            | 8            | 7             | 0:12.22                         |
| 279       | T             | 5             | 4            | 1             | 0:04.62                         |
| 280       | T             | 5             | 4            | 1             | 0:04.57                         |
| 281       | T             | 5             | 4            | 1             | 0:04.63                         |
| 282       | T             | 5             | 4            | 1             | 0:04.60                         |
| 283       | T             | 5             | 4            | 1             | 0:04.61                         |
| 284       | T             | 11            | 6            | 5             | 0:09.18                         |
| 285       | T             | 5             | 4            | 1             | 0:04.59                         |
| 286       | T             | 16            | 8            | 8             | 0:12.96                         |
| 287       | T             | 13            | 7            | 6             | 0:10.61                         |
| 288       | T             | 5             | 4            | 1             | 0:04.58                         |
| 289       | T             | 11            | 6            | 5             | 0:09.15                         |
| 290       | T             | 21            | 10           | 11            | 0:16.77                         |
| 291       | T             | 6             | 4            | 2             | 0:05.34                         |
| 292       | T             | 15            | 8            | 7             | 0:12.18                         |
| 293       | T             | 11            | 6            | 5             | 0:09.18                         |

| <b>Id</b> | <b>Result</b> | <b>#total</b> | <b>#true</b> | <b>#false</b> | <b>Execution time (min:sec)</b> |
|-----------|---------------|---------------|--------------|---------------|---------------------------------|
| 294       | T             | 5             | 4            | 1             | 0:04.62                         |
| 295       | T             | 6             | 5            | 1             | 0:05.36                         |
| 296       | T             | 6             | 4            | 2             | 0:05.43                         |
| 297       | T             | 6             | 4            | 2             | 0:05.39                         |
| 298       | T             | 15            | 8            | 7             | 0:12.19                         |
| 299       | T             | 6             | 4            | 2             | 0:05.37                         |
| 300       | T             | 10            | 6            | 4             | 0:08.40                         |
| 301       | T             | 8             | 5            | 3             | 0:06.91                         |
| 302       | T             | 10            | 6            | 4             | 0:08.41                         |
| 303       | T             | 6             | 4            | 2             | 0:05.39                         |
| 304       | T             | 23            | 11           | 12            | 0:18.30                         |
| 305       | T             | 39            | 17           | 22            | 0:30.26                         |
| 306       | T             | 6             | 4            | 2             | 0:05.36                         |
| 307       | T             | 8             | 5            | 3             | 0:06.89                         |
| 308       | T             | 13            | 7            | 6             | 0:10.68                         |
| 309       | T             | 6             | 4            | 2             | 0:05.41                         |
| 310       | T             | 5             | 4            | 1             | 0:04.58                         |
| 311       | T             | 6             | 4            | 2             | 0:05.39                         |
| 312       | T             | 13            | 7            | 6             | 0:10.72                         |
| 313       | T             | 24            | 11           | 13            | 0:18.97                         |
| 314       | T             | 5             | 4            | 1             | 0:04.58                         |
| 315       | T             | 16            | 8            | 8             | 0:13.05                         |
| 316       | T             | 10            | 6            | 4             | 0:08.37                         |
| 317       | T             | 11            | 6            | 5             | 0:09.19                         |
| 318       | T             | 13            | 7            | 6             | 0:10.69                         |
| 319       | T             | 6             | 4            | 2             | 0:05.36                         |
| 320       | T             | 5             | 4            | 1             | 0:04.60                         |
| 321       | T             | 6             | 4            | 2             | 0:05.38                         |
| 322       | T             | 21            | 10           | 11            | 0:16.72                         |
| 323       | T             | 6             | 4            | 2             | 0:05.34                         |
| 324       | T             | 8             | 5            | 3             | 0:06.81                         |
| 325       | T             | 8             | 5            | 3             | 0:06.87                         |
| 326       | T             | 5             | 4            | 1             | 0:04.60                         |
| 327       | T             | 26            | 12           | 14            | 0:20.48                         |
| 328       | T             | 5             | 4            | 1             | 0:04.62                         |
| 329       | T             | 5             | 4            | 1             | 0:04.65                         |
| 330       | T             | 44            | 19           | 25            | 0:34.15                         |
| 331       | T             | 11            | 6            | 5             | 0:09.18                         |
| 332       | T             | 5             | 4            | 1             | 0:04.59                         |
| 333       | T             | 5             | 4            | 1             | 0:04.58                         |
| 334       | T             | 6             | 6            | 0             | 0:05.35                         |
| 335       | T             | 5             | 4            | 1             | 0:04.59                         |
| 336       | T             | 5             | 4            | 1             | 0:04.65                         |
| 337       | T             | 5             | 4            | 1             | 0:04.58                         |
| 338       | T             | 24            | 11           | 13            | 0:19.13                         |
| 339       | T             | 16            | 8            | 8             | 0:12.95                         |
| 340       | T             | 5             | 4            | 1             | 0:04.57                         |
| 341       | T             | 6             | 4            | 2             | 0:05.37                         |

| <b>Id</b> | <b>Result</b> | <b>#total</b> | <b>#true</b> | <b>#false</b> | <b>Execution time (min:sec)</b> |
|-----------|---------------|---------------|--------------|---------------|---------------------------------|
| 342       | T             | 6             | 6            | 0             | 0:05.35                         |
| 343       | T             | 6             | 4            | 2             | 0:05.35                         |
| 344       | F             | 535           | 293          | 242           | 6:46.42                         |
| 345       | T             | 11            | 6            | 5             | 0:09.16                         |
| 346       | T             | 6             | 5            | 1             | 0:05.37                         |
| 347       | T             | 5             | 4            | 1             | 0:04.67                         |
| 348       | T             | 6             | 4            | 2             | 0:05.33                         |
| 349       | T             | 6             | 4            | 2             | 0:05.39                         |
| 350       | T             | 19            | 9            | 10            | 0:15.28                         |
| 351       | T             | 6             | 4            | 2             | 0:05.36                         |
| 352       | T             | 8             | 5            | 3             | 0:06.86                         |
| 353       | T             | 5             | 4            | 1             | 0:04.61                         |
| 354       | T             | 5             | 4            | 1             | 0:04.60                         |
| 355       | T             | 5             | 4            | 1             | 0:04.60                         |
| 356       | T             | 8             | 5            | 3             | 0:06.92                         |
| 357       | T             | 6             | 4            | 2             | 0:05.38                         |
| 358       | T             | 10            | 6            | 4             | 0:08.41                         |
| 359       | T             | 10            | 6            | 4             | 0:08.36                         |
| 360       | T             | 6             | 5            | 1             | 0:05.34                         |
| 361       | T             | 5             | 4            | 1             | 0:04.58                         |
| 362       | T             | 18            | 9            | 9             | 0:14.55                         |
| 363       | T             | 29            | 13           | 16            | 0:22.94                         |
| 364       | T             | 13            | 7            | 6             | 0:10.65                         |
| 365       | T             | 5             | 4            | 1             | 0:04.60                         |
| 366       | T             | 8             | 5            | 3             | 0:06.89                         |
| 367       | T             | 15            | 8            | 7             | 0:12.23                         |
| 368       | F             | 36            | 14           | 22            | 0:27.97                         |
| 369       | T             | 5             | 4            | 1             | 0:04.56                         |
| 370       | T             | 6             | 4            | 2             | 0:05.36                         |
| 371       | T             | 8             | 5            | 3             | 0:06.85                         |
| 372       | T             | 5             | 4            | 1             | 0:04.59                         |
| 373       | T             | 5             | 4            | 1             | 0:04.64                         |
| 374       | T             | 8             | 5            | 3             | 0:06.92                         |
| 375       | T             | 10            | 6            | 4             | 0:08.47                         |
| 376       | T             | 18            | 9            | 9             | 0:14.53                         |
| 377       | T             | 13            | 7            | 6             | 0:10.76                         |
| 378       | F             | 20            | 6            | 14            | 0:15.97                         |
| 379       | T             | 6             | 4            | 2             | 0:05.33                         |
| 380       | T             | 6             | 6            | 0             | 0:05.36                         |
| 381       | T             | 8             | 5            | 3             | 0:06.89                         |
| 382       | T             | 6             | 4            | 2             | 0:05.40                         |
| 383       | T             | 13            | 7            | 6             | 0:10.68                         |
| 384       | T             | 6             | 6            | 0             | 0:05.37                         |
| 385       | T             | 11            | 6            | 5             | 0:09.10                         |
| 386       | F             | 24            | 8            | 16            | 0:18.95                         |
| 387       | T             | 16            | 8            | 8             | 0:12.97                         |
| 388       | T             | 13            | 7            | 6             | 0:10.74                         |
| 389       | T             | 10            | 6            | 4             | 0:08.40                         |

| <b>Id</b> | <b>Result</b> | <b>#total</b> | <b>#true</b> | <b>#false</b> | <b>Execution time (min:sec)</b> |
|-----------|---------------|---------------|--------------|---------------|---------------------------------|
| 390       | T             | 24            | 11           | 13            | 0:19.08                         |
| 391       | T             | 6             | 4            | 2             | 0:05.41                         |
| 392       | T             | 19            | 9            | 10            | 0:15.19                         |
| 393       | T             | 5             | 4            | 1             | 0:04.62                         |
| 394       | T             | 8             | 5            | 3             | 0:06.84                         |
| 395       | T             | 5             | 4            | 1             | 0:04.55                         |
| 396       | T             | 19            | 9            | 10            | 0:15.35                         |
| 397       | T             | 5             | 4            | 1             | 0:04.61                         |
| 398       | T             | 6             | 5            | 1             | 0:05.36                         |
| 399       | T             | 8             | 5            | 3             | 0:06.88                         |
| 400       | T             | 5             | 4            | 1             | 0:04.61                         |
| 401       | T             | 16            | 8            | 8             | 0:13.01                         |
| 402       | T             | 13            | 7            | 6             | 0:10.75                         |
| 403       | T             | 6             | 4            | 2             | 0:05.36                         |
| 404       | T             | 6             | 4            | 2             | 0:05.39                         |
| 405       | T             | 8             | 5            | 3             | 0:06.90                         |
| 406       | T             | 16            | 8            | 8             | 0:12.91                         |
| 407       | T             | 16            | 8            | 8             | 0:12.90                         |
| 408       | T             | 5             | 4            | 1             | 0:04.59                         |
| 409       | T             | 21            | 10           | 11            | 0:16.84                         |
| 410       | T             | 8             | 5            | 3             | 0:06.95                         |
| 411       | T             | 11            | 6            | 5             | 0:09.20                         |
| 412       | T             | 19            | 9            | 10            | 0:15.27                         |
| 413       | T             | 21            | 10           | 11            | 0:16.82                         |
| 414       | T             | 8             | 5            | 3             | 0:06.88                         |
| 415       | T             | 11            | 6            | 5             | 0:09.17                         |
| 416       | T             | 13            | 7            | 6             | 0:10.69                         |
| 417       | F             | 14            | 3            | 11            | 0:11.44                         |
| 418       | T             | 6             | 6            | 0             | 0:05.35                         |
| 419       | F             | 12            | 2            | 10            | 0:09.98                         |
| 420       | T             | 11            | 6            | 5             | 0:09.10                         |
| 421       | T             | 28            | 13           | 15            | 0:22.03                         |
| 422       | T             | 11            | 6            | 5             | 0:09.18                         |
| 423       | T             | 8             | 5            | 3             | 0:06.91                         |
| 424       | T             | 5             | 4            | 1             | 0:04.58                         |
| 425       | T             | 29            | 13           | 16            | 0:22.95                         |
| 426       | T             | 11            | 6            | 5             | 0:09.15                         |
| 427       | T             | 8             | 5            | 3             | 0:06.83                         |
| 428       | T             | 5             | 4            | 1             | 0:04.60                         |
| 429       | T             | 10            | 6            | 4             | 0:08.41                         |
| 430       | T             | 5             | 4            | 1             | 0:04.61                         |
| 431       | T             | 6             | 4            | 2             | 0:05.32                         |
| 432       | T             | 5             | 4            | 1             | 0:04.61                         |
| 433       | T             | 10            | 6            | 4             | 0:08.39                         |
| 434       | T             | 10            | 6            | 4             | 0:08.43                         |
| 435       | T             | 19            | 9            | 10            | 0:15.18                         |
| 436       | T             | 6             | 4            | 2             | 0:05.36                         |
| 437       | T             | 5             | 4            | 1             | 0:04.62                         |

| <b>Id</b> | <b>Result</b> | <b>#total</b> | <b>#true</b> | <b>#false</b> | <b>Execution time (min:sec)</b> |
|-----------|---------------|---------------|--------------|---------------|---------------------------------|
| 438       | T             | 16            | 8            | 8             | 0:13.03                         |
| 439       | T             | 6             | 4            | 2             | 0:05.37                         |
| 440       | T             | 16            | 8            | 8             | 0:12.99                         |
| 441       | T             | 6             | 4            | 2             | 0:05.37                         |
| 442       | T             | 6             | 5            | 1             | 0:05.33                         |
| 443       | T             | 5             | 4            | 1             | 0:04.60                         |
| 444       | T             | 8             | 5            | 3             | 0:06.92                         |
| 445       | T             | 5             | 4            | 1             | 0:04.57                         |
| 446       | F             | 25            | 8            | 17            | 0:19.77                         |
| 447       | T             | 6             | 4            | 2             | 0:05.35                         |
| 448       | T             | 5             | 4            | 1             | 0:04.62                         |
| 449       | T             | 5             | 4            | 1             | 0:04.60                         |
| 450       | T             | 10            | 6            | 4             | 0:08.38                         |
| 451       | T             | 6             | 4            | 2             | 0:05.40                         |
| 452       | T             | 8             | 5            | 3             | 0:06.86                         |
| 453       | T             | 5             | 4            | 1             | 0:04.65                         |
| 454       | T             | 11            | 6            | 5             | 0:09.10                         |
| 455       | F             | 909           | 508          | 401           | 11:28.53                        |
| 456       | T             | 8             | 5            | 3             | 0:06.88                         |
| 457       | T             | 5             | 4            | 1             | 0:04.61                         |
| 458       | T             | 15            | 8            | 7             | 0:12.24                         |
| 459       | T             | 28            | 13           | 15            | 0:22.13                         |
| 460       | T             | 10            | 6            | 4             | 0:08.43                         |
| 461       | T             | 16            | 8            | 8             | 0:12.91                         |
| 462       | T             | 6             | 6            | 0             | 0:05.33                         |
| 463       | T             | 5             | 4            | 1             | 0:04.60                         |
| 464       | T             | 11            | 6            | 5             | 0:09.15                         |
| 465       | T             | 6             | 4            | 2             | 0:05.32                         |
| 466       | T             | 6             | 4            | 2             | 0:05.37                         |
| 467       | T             | 5             | 4            | 1             | 0:04.64                         |
| 468       | T             | 6             | 5            | 1             | 0:05.35                         |
| 469       | T             | 5             | 4            | 1             | 0:04.62                         |
| 470       | T             | 5             | 4            | 1             | 0:04.62                         |
| 471       | T             | 5             | 4            | 1             | 0:04.62                         |
| 472       | T             | 11            | 6            | 5             | 0:09.14                         |
| 473       | T             | 6             | 6            | 0             | 0:05.40                         |
| 474       | T             | 5             | 4            | 1             | 0:04.62                         |
| 475       | T             | 13            | 7            | 6             | 0:10.69                         |
| 476       | F             | 16            | 4            | 12            | 0:13.02                         |
| 477       | T             | 6             | 4            | 2             | 0:05.36                         |
| 478       | T             | 13            | 7            | 6             | 0:10.65                         |
| 479       | T             | 5             | 4            | 1             | 0:04.57                         |
| 480       | T             | 5             | 4            | 1             | 0:04.63                         |
| 481       | T             | 6             | 6            | 0             | 0:05.32                         |
| 482       | T             | 15            | 8            | 7             | 0:12.28                         |
| 483       | T             | 15            | 8            | 7             | 0:12.20                         |
| 484       | T             | 13            | 7            | 6             | 0:10.70                         |
| 485       | T             | 5             | 4            | 1             | 0:04.58                         |

| <b>Id</b> | <b>Result</b> | <b>#total</b> | <b>#true</b> | <b>#false</b> | <b>Execution time (min:sec)</b> |
|-----------|---------------|---------------|--------------|---------------|---------------------------------|
| 486       | T             | 5             | 4            | 1             | 0:04.62                         |
| 487       | T             | 15            | 8            | 7             | 0:12.14                         |
| 488       | T             | 6             | 4            | 2             | 0:05.41                         |
| 489       | T             | 6             | 4            | 2             | 0:05.35                         |
| 490       | T             | 6             | 4            | 2             | 0:05.38                         |
| 491       | T             | 11            | 6            | 5             | 0:09.18                         |
| 492       | T             | 26            | 12           | 14            | 0:20.60                         |
| 493       | T             | 5             | 4            | 1             | 0:04.59                         |
| 494       | T             | 6             | 4            | 2             | 0:05.36                         |
| 495       | T             | 6             | 4            | 2             | 0:05.40                         |
| 496       | T             | 8             | 5            | 3             | 0:06.91                         |
| 497       | T             | 5             | 4            | 1             | 0:04.57                         |
| 498       | T             | 6             | 4            | 2             | 0:05.38                         |
| 499       | T             | 21            | 10           | 11            | 0:16.91                         |
| 500       | T             | 5             | 4            | 1             | 0:04.62                         |

Table 6: Model checking results corresponding to logic property 14

| <b>Id</b> | <b>Result</b> | <b>#total</b> | <b>#true</b> | <b>#false</b> | <b>Execution time (min:sec)</b> |
|-----------|---------------|---------------|--------------|---------------|---------------------------------|
| 1         | T             | 28            | 0            | 28            | 0:22.17                         |
| 2         | T             | 28            | 0            | 28            | 0:22.08                         |
| 3         | T             | 28            | 0            | 28            | 0:22.04                         |
| 4         | T             | 28            | 0            | 28            | 0:21.92                         |
| 5         | T             | 28            | 0            | 28            | 0:22.07                         |
| 6         | T             | 28            | 0            | 28            | 0:22.27                         |
| 7         | T             | 28            | 0            | 28            | 0:22.07                         |
| 8         | T             | 28            | 0            | 28            | 0:21.97                         |
| 9         | T             | 28            | 0            | 28            | 0:22.14                         |
| 10        | T             | 28            | 0            | 28            | 0:22.14                         |
| 11        | T             | 28            | 0            | 28            | 0:22.18                         |
| 12        | T             | 28            | 0            | 28            | 0:22.02                         |
| 13        | T             | 28            | 0            | 28            | 0:22.34                         |
| 14        | T             | 28            | 0            | 28            | 0:22.13                         |
| 15        | T             | 28            | 0            | 28            | 0:22.14                         |
| 16        | T             | 28            | 0            | 28            | 0:22.05                         |
| 17        | T             | 28            | 0            | 28            | 0:22.14                         |
| 18        | T             | 28            | 0            | 28            | 0:22.24                         |
| 19        | T             | 28            | 0            | 28            | 0:23.61                         |
| 20        | T             | 28            | 0            | 28            | 0:22.07                         |
| 21        | T             | 28            | 0            | 28            | 0:22.14                         |
| 22        | T             | 28            | 0            | 28            | 0:22.11                         |
| 23        | T             | 28            | 0            | 28            | 0:22.05                         |
| 24        | T             | 28            | 0            | 28            | 0:22.11                         |
| 25        | T             | 28            | 0            | 28            | 0:22.25                         |
| 26        | T             | 28            | 0            | 28            | 0:22.02                         |

| <b>Id</b> | <b>Result</b> | <b>#total</b> | <b>#true</b> | <b>#false</b> | <b>Execution time (min:sec)</b> |
|-----------|---------------|---------------|--------------|---------------|---------------------------------|
| 27        | T             | 28            | 0            | 28            | 0:22.13                         |
| 28        | T             | 28            | 0            | 28            | 0:22.05                         |
| 29        | T             | 28            | 0            | 28            | 0:22.17                         |
| 30        | T             | 28            | 0            | 28            | 0:22.26                         |
| 31        | T             | 28            | 0            | 28            | 0:22.07                         |
| 32        | T             | 28            | 0            | 28            | 0:22.13                         |
| 33        | T             | 28            | 0            | 28            | 0:21.90                         |
| 34        | T             | 28            | 0            | 28            | 0:22.13                         |
| 35        | T             | 28            | 0            | 28            | 0:22.26                         |
| 36        | T             | 28            | 0            | 28            | 0:22.09                         |
| 37        | T             | 28            | 0            | 28            | 0:21.97                         |
| 38        | T             | 28            | 0            | 28            | 0:22.13                         |
| 39        | T             | 28            | 0            | 28            | 0:21.87                         |
| 40        | T             | 28            | 0            | 28            | 0:22.19                         |
| 41        | T             | 28            | 0            | 28            | 0:22.01                         |
| 42        | T             | 28            | 0            | 28            | 0:22.12                         |
| 43        | T             | 28            | 0            | 28            | 0:22.12                         |
| 44        | T             | 28            | 0            | 28            | 0:21.94                         |
| 45        | T             | 28            | 0            | 28            | 0:22.05                         |
| 46        | T             | 28            | 0            | 28            | 0:22.20                         |
| 47        | T             | 28            | 0            | 28            | 0:22.24                         |
| 48        | T             | 28            | 0            | 28            | 0:22.15                         |
| 49        | T             | 28            | 0            | 28            | 0:22.07                         |
| 50        | T             | 28            | 0            | 28            | 0:22.07                         |
| 51        | T             | 28            | 0            | 28            | 0:22.21                         |
| 52        | T             | 28            | 0            | 28            | 0:22.29                         |
| 53        | T             | 28            | 0            | 28            | 0:22.08                         |
| 54        | T             | 28            | 0            | 28            | 0:22.06                         |
| 55        | T             | 28            | 0            | 28            | 0:22.12                         |
| 56        | T             | 28            | 0            | 28            | 0:22.14                         |
| 57        | T             | 28            | 0            | 28            | 0:22.02                         |
| 58        | T             | 28            | 0            | 28            | 0:22.08                         |
| 59        | T             | 28            | 0            | 28            | 0:21.96                         |
| 60        | T             | 28            | 0            | 28            | 0:22.22                         |
| 61        | T             | 28            | 0            | 28            | 0:21.96                         |
| 62        | T             | 28            | 0            | 28            | 0:23.11                         |
| 63        | T             | 28            | 0            | 28            | 0:22.25                         |
| 64        | T             | 28            | 0            | 28            | 0:22.01                         |
| 65        | T             | 28            | 0            | 28            | 0:22.08                         |
| 66        | T             | 28            | 0            | 28            | 0:22.19                         |
| 67        | T             | 28            | 0            | 28            | 0:22.25                         |
| 68        | T             | 28            | 0            | 28            | 0:22.11                         |
| 69        | T             | 28            | 0            | 28            | 0:22.07                         |
| 70        | T             | 28            | 0            | 28            | 0:22.08                         |
| 71        | T             | 28            | 0            | 28            | 0:22.04                         |
| 72        | T             | 28            | 0            | 28            | 0:22.11                         |
| 73        | T             | 28            | 0            | 28            | 0:22.05                         |
| 74        | T             | 28            | 0            | 28            | 0:22.10                         |



| <b>Id</b> | <b>Result</b> | <b>#total</b> | <b>#true</b> | <b>#false</b> | <b>Execution time (min:sec)</b> |
|-----------|---------------|---------------|--------------|---------------|---------------------------------|
| 75        | T             | 28            | 0            | 28            | 0:22.91                         |
| 76        | T             | 28            | 0            | 28            | 0:22.09                         |
| 77        | T             | 28            | 0            | 28            | 0:22.03                         |
| 78        | T             | 28            | 0            | 28            | 0:22.22                         |
| 79        | T             | 28            | 0            | 28            | 0:21.98                         |
| 80        | T             | 28            | 0            | 28            | 0:22.11                         |
| 81        | T             | 28            | 0            | 28            | 0:22.15                         |
| 82        | T             | 28            | 0            | 28            | 0:22.03                         |
| 83        | T             | 28            | 0            | 28            | 0:22.03                         |
| 84        | T             | 28            | 0            | 28            | 0:22.01                         |
| 85        | T             | 28            | 0            | 28            | 0:21.99                         |
| 86        | T             | 28            | 0            | 28            | 0:22.09                         |
| 87        | T             | 28            | 0            | 28            | 0:22.00                         |
| 88        | T             | 28            | 0            | 28            | 0:21.97                         |
| 89        | T             | 28            | 0            | 28            | 0:22.15                         |
| 90        | T             | 28            | 0            | 28            | 0:24.03                         |
| 91        | T             | 28            | 0            | 28            | 0:22.01                         |
| 92        | T             | 28            | 0            | 28            | 0:22.00                         |
| 93        | T             | 28            | 0            | 28            | 0:21.96                         |
| 94        | T             | 28            | 0            | 28            | 0:22.03                         |
| 95        | T             | 28            | 0            | 28            | 0:22.10                         |
| 96        | T             | 28            | 0            | 28            | 0:22.00                         |
| 97        | T             | 28            | 0            | 28            | 0:22.08                         |
| 98        | T             | 28            | 0            | 28            | 0:22.08                         |
| 99        | T             | 28            | 0            | 28            | 0:22.19                         |
| 100       | T             | 28            | 0            | 28            | 0:22.19                         |
| 101       | T             | 28            | 0            | 28            | 0:22.00                         |
| 102       | T             | 28            | 0            | 28            | 0:22.13                         |
| 103       | T             | 28            | 0            | 28            | 0:22.25                         |
| 104       | T             | 28            | 0            | 28            | 0:22.00                         |
| 105       | T             | 28            | 0            | 28            | 0:22.16                         |
| 106       | T             | 28            | 0            | 28            | 0:21.96                         |
| 107       | T             | 28            | 0            | 28            | 0:22.16                         |
| 108       | T             | 28            | 0            | 28            | 0:22.19                         |
| 109       | T             | 28            | 0            | 28            | 0:21.94                         |
| 110       | T             | 28            | 0            | 28            | 0:21.90                         |
| 111       | T             | 28            | 0            | 28            | 0:22.15                         |
| 112       | T             | 28            | 0            | 28            | 0:21.96                         |
| 113       | T             | 28            | 0            | 28            | 0:22.10                         |
| 114       | T             | 28            | 0            | 28            | 0:22.09                         |
| 115       | T             | 28            | 0            | 28            | 0:21.99                         |
| 116       | T             | 28            | 0            | 28            | 0:22.08                         |
| 117       | T             | 28            | 0            | 28            | 0:22.12                         |
| 118       | T             | 28            | 0            | 28            | 0:22.04                         |
| 119       | T             | 28            | 0            | 28            | 0:22.11                         |
| 120       | T             | 28            | 0            | 28            | 0:22.06                         |
| 121       | T             | 28            | 0            | 28            | 0:22.06                         |
| 122       | T             | 28            | 0            | 28            | 0:21.99                         |

| <b>Id</b> | <b>Result</b> | <b>#total</b> | <b>#true</b> | <b>#false</b> | <b>Execution time (min:sec)</b> |
|-----------|---------------|---------------|--------------|---------------|---------------------------------|
| 123       | T             | 28            | 0            | 28            | 0:22.02                         |
| 124       | T             | 28            | 0            | 28            | 0:22.04                         |
| 125       | T             | 28            | 0            | 28            | 0:22.13                         |
| 126       | T             | 28            | 0            | 28            | 0:21.98                         |
| 127       | T             | 28            | 0            | 28            | 0:22.00                         |
| 128       | T             | 28            | 0            | 28            | 0:22.08                         |
| 129       | T             | 28            | 0            | 28            | 0:22.06                         |
| 130       | T             | 28            | 0            | 28            | 0:21.99                         |
| 131       | T             | 28            | 0            | 28            | 0:22.01                         |
| 132       | T             | 28            | 0            | 28            | 0:21.97                         |
| 133       | T             | 28            | 0            | 28            | 0:22.14                         |
| 134       | T             | 28            | 0            | 28            | 0:21.96                         |
| 135       | T             | 28            | 0            | 28            | 0:22.05                         |
| 136       | T             | 28            | 0            | 28            | 0:22.00                         |
| 137       | T             | 28            | 0            | 28            | 0:22.07                         |
| 138       | T             | 28            | 0            | 28            | 0:21.99                         |
| 139       | T             | 28            | 0            | 28            | 0:21.97                         |
| 140       | T             | 28            | 0            | 28            | 0:22.13                         |
| 141       | T             | 28            | 0            | 28            | 0:22.13                         |
| 142       | T             | 28            | 0            | 28            | 0:22.01                         |
| 143       | T             | 28            | 0            | 28            | 0:22.09                         |
| 144       | T             | 28            | 0            | 28            | 0:22.13                         |
| 145       | T             | 28            | 0            | 28            | 0:23.46                         |
| 146       | T             | 28            | 0            | 28            | 0:24.23                         |
| 147       | T             | 28            | 0            | 28            | 0:22.11                         |
| 148       | T             | 28            | 0            | 28            | 0:22.01                         |
| 149       | T             | 28            | 0            | 28            | 0:22.09                         |
| 150       | T             | 28            | 0            | 28            | 0:22.01                         |
| 151       | T             | 28            | 0            | 28            | 0:22.46                         |
| 152       | T             | 28            | 0            | 28            | 0:22.20                         |
| 153       | T             | 28            | 0            | 28            | 0:22.02                         |
| 154       | T             | 28            | 0            | 28            | 0:22.23                         |
| 155       | T             | 28            | 0            | 28            | 0:22.17                         |
| 156       | T             | 28            | 0            | 28            | 0:22.05                         |
| 157       | T             | 28            | 0            | 28            | 0:22.09                         |
| 158       | T             | 28            | 0            | 28            | 0:22.14                         |
| 159       | T             | 28            | 0            | 28            | 0:22.28                         |
| 160       | T             | 28            | 0            | 28            | 0:22.21                         |
| 161       | T             | 28            | 0            | 28            | 0:22.15                         |
| 162       | T             | 28            | 0            | 28            | 0:22.38                         |
| 163       | T             | 28            | 0            | 28            | 0:22.06                         |
| 164       | T             | 28            | 0            | 28            | 0:22.25                         |
| 165       | T             | 28            | 0            | 28            | 0:22.06                         |
| 166       | T             | 28            | 0            | 28            | 0:22.15                         |
| 167       | T             | 28            | 0            | 28            | 0:22.01                         |
| 168       | T             | 28            | 0            | 28            | 0:22.12                         |
| 169       | T             | 28            | 0            | 28            | 0:22.39                         |
| 170       | T             | 28            | 0            | 28            | 0:21.98                         |

| <b>Id</b> | <b>Result</b> | <b>#total</b> | <b>#true</b> | <b>#false</b> | <b>Execution time (min:sec)</b> |
|-----------|---------------|---------------|--------------|---------------|---------------------------------|
| 171       | T             | 28            | 0            | 28            | 0:22.20                         |
| 172       | T             | 28            | 0            | 28            | 0:22.12                         |
| 173       | T             | 28            | 0            | 28            | 0:22.23                         |
| 174       | T             | 28            | 0            | 28            | 0:22.37                         |
| 175       | T             | 28            | 0            | 28            | 0:22.15                         |
| 176       | T             | 28            | 0            | 28            | 0:22.27                         |
| 177       | T             | 28            | 0            | 28            | 0:22.14                         |
| 178       | T             | 28            | 0            | 28            | 0:22.20                         |
| 179       | T             | 28            | 0            | 28            | 0:22.13                         |
| 180       | T             | 28            | 0            | 28            | 0:22.01                         |
| 181       | T             | 28            | 0            | 28            | 0:22.28                         |
| 182       | T             | 28            | 0            | 28            | 0:22.16                         |
| 183       | T             | 28            | 0            | 28            | 0:22.08                         |
| 184       | T             | 28            | 0            | 28            | 0:22.14                         |
| 185       | T             | 28            | 0            | 28            | 0:22.17                         |
| 186       | T             | 28            | 0            | 28            | 0:22.11                         |
| 187       | T             | 28            | 0            | 28            | 0:22.15                         |
| 188       | T             | 28            | 0            | 28            | 0:22.09                         |
| 189       | T             | 28            | 0            | 28            | 0:22.18                         |
| 190       | T             | 28            | 0            | 28            | 0:22.06                         |
| 191       | T             | 28            | 0            | 28            | 0:22.15                         |
| 192       | T             | 28            | 0            | 28            | 0:22.21                         |
| 193       | T             | 28            | 0            | 28            | 0:22.03                         |
| 194       | T             | 28            | 0            | 28            | 0:22.06                         |
| 195       | T             | 28            | 0            | 28            | 0:22.09                         |
| 196       | T             | 28            | 0            | 28            | 0:21.95                         |
| 197       | T             | 28            | 0            | 28            | 0:23.84                         |
| 198       | T             | 28            | 0            | 28            | 0:22.14                         |
| 199       | T             | 28            | 0            | 28            | 0:22.09                         |
| 200       | T             | 28            | 0            | 28            | 0:22.04                         |
| 201       | T             | 28            | 0            | 28            | 0:22.05                         |
| 202       | T             | 28            | 0            | 28            | 0:21.95                         |
| 203       | T             | 28            | 0            | 28            | 0:22.14                         |
| 204       | T             | 28            | 0            | 28            | 0:21.92                         |
| 205       | T             | 28            | 0            | 28            | 0:21.91                         |
| 206       | T             | 28            | 0            | 28            | 0:21.97                         |
| 207       | T             | 28            | 0            | 28            | 0:22.06                         |
| 208       | T             | 28            | 0            | 28            | 0:22.13                         |
| 209       | T             | 28            | 0            | 28            | 0:22.09                         |
| 210       | T             | 28            | 0            | 28            | 0:22.15                         |
| 211       | T             | 28            | 0            | 28            | 0:22.17                         |
| 212       | T             | 28            | 0            | 28            | 0:22.03                         |
| 213       | T             | 28            | 0            | 28            | 0:22.06                         |
| 214       | T             | 28            | 0            | 28            | 0:22.08                         |
| 215       | T             | 28            | 0            | 28            | 0:21.92                         |
| 216       | T             | 28            | 0            | 28            | 0:22.10                         |
| 217       | T             | 28            | 0            | 28            | 0:22.10                         |
| 218       | T             | 28            | 0            | 28            | 0:22.19                         |

| <b>Id</b> | <b>Result</b> | <b>#total</b> | <b>#true</b> | <b>#false</b> | <b>Execution time (min:sec)</b> |
|-----------|---------------|---------------|--------------|---------------|---------------------------------|
| 219       | T             | 28            | 0            | 28            | 0:22.10                         |
| 220       | T             | 28            | 0            | 28            | 0:22.03                         |
| 221       | T             | 28            | 0            | 28            | 0:22.17                         |
| 222       | T             | 28            | 0            | 28            | 0:22.15                         |
| 223       | T             | 28            | 0            | 28            | 0:22.00                         |
| 224       | T             | 28            | 0            | 28            | 0:22.12                         |
| 225       | T             | 28            | 0            | 28            | 0:22.00                         |
| 226       | T             | 28            | 0            | 28            | 0:22.08                         |
| 227       | T             | 28            | 0            | 28            | 0:22.05                         |
| 228       | T             | 28            | 0            | 28            | 0:22.06                         |
| 229       | T             | 28            | 0            | 28            | 0:22.08                         |
| 230       | T             | 28            | 0            | 28            | 0:22.09                         |
| 231       | T             | 28            | 0            | 28            | 0:22.03                         |
| 232       | T             | 28            | 0            | 28            | 0:21.96                         |
| 233       | T             | 28            | 0            | 28            | 0:22.12                         |
| 234       | T             | 28            | 0            | 28            | 0:22.04                         |
| 235       | T             | 28            | 0            | 28            | 0:21.99                         |
| 236       | T             | 28            | 0            | 28            | 0:22.18                         |
| 237       | T             | 28            | 0            | 28            | 0:22.13                         |
| 238       | T             | 28            | 0            | 28            | 0:22.12                         |
| 239       | T             | 28            | 0            | 28            | 0:22.01                         |
| 240       | T             | 28            | 0            | 28            | 0:21.96                         |
| 241       | T             | 28            | 0            | 28            | 0:22.19                         |
| 242       | T             | 28            | 0            | 28            | 0:22.09                         |
| 243       | T             | 28            | 0            | 28            | 0:22.03                         |
| 244       | T             | 28            | 0            | 28            | 0:22.23                         |
| 245       | T             | 28            | 0            | 28            | 0:21.97                         |
| 246       | T             | 28            | 0            | 28            | 0:22.11                         |
| 247       | T             | 28            | 0            | 28            | 0:21.96                         |
| 248       | T             | 28            | 0            | 28            | 0:22.00                         |
| 249       | T             | 28            | 0            | 28            | 0:22.02                         |
| 250       | T             | 28            | 0            | 28            | 0:22.25                         |
| 251       | T             | 28            | 0            | 28            | 0:22.01                         |
| 252       | T             | 28            | 0            | 28            | 0:22.12                         |
| 253       | T             | 28            | 0            | 28            | 0:22.18                         |
| 254       | T             | 28            | 0            | 28            | 0:22.02                         |
| 255       | T             | 28            | 0            | 28            | 0:22.15                         |
| 256       | T             | 28            | 0            | 28            | 0:22.07                         |
| 257       | T             | 28            | 0            | 28            | 0:21.98                         |
| 258       | T             | 28            | 0            | 28            | 0:22.03                         |
| 259       | T             | 28            | 0            | 28            | 0:22.15                         |
| 260       | T             | 28            | 0            | 28            | 0:22.07                         |
| 261       | T             | 28            | 0            | 28            | 0:21.91                         |
| 262       | T             | 28            | 0            | 28            | 0:22.06                         |
| 263       | T             | 28            | 0            | 28            | 0:22.08                         |
| 264       | T             | 28            | 0            | 28            | 0:22.07                         |
| 265       | T             | 28            | 0            | 28            | 0:22.07                         |
| 266       | T             | 28            | 0            | 28            | 0:22.03                         |

| <b>Id</b> | <b>Result</b> | <b>#total</b> | <b>#true</b> | <b>#false</b> | <b>Execution time (min:sec)</b> |
|-----------|---------------|---------------|--------------|---------------|---------------------------------|
| 267       | T             | 28            | 0            | 28            | 0:22.02                         |
| 268       | T             | 28            | 0            | 28            | 0:22.09                         |
| 269       | T             | 28            | 0            | 28            | 0:22.21                         |
| 270       | T             | 28            | 0            | 28            | 0:22.09                         |
| 271       | T             | 28            | 0            | 28            | 0:22.20                         |
| 272       | T             | 28            | 0            | 28            | 0:22.09                         |
| 273       | T             | 28            | 0            | 28            | 0:21.94                         |
| 274       | T             | 28            | 0            | 28            | 0:22.07                         |
| 275       | T             | 28            | 0            | 28            | 0:22.10                         |
| 276       | T             | 28            | 0            | 28            | 0:22.11                         |
| 277       | T             | 28            | 0            | 28            | 0:22.05                         |
| 278       | T             | 28            | 0            | 28            | 0:22.20                         |
| 279       | T             | 28            | 0            | 28            | 0:22.17                         |
| 280       | T             | 28            | 0            | 28            | 0:22.13                         |
| 281       | T             | 28            | 0            | 28            | 0:21.98                         |
| 282       | T             | 28            | 0            | 28            | 0:22.06                         |
| 283       | T             | 28            | 0            | 28            | 0:21.98                         |
| 284       | T             | 28            | 0            | 28            | 0:22.02                         |
| 285       | T             | 28            | 0            | 28            | 0:22.11                         |
| 286       | T             | 28            | 0            | 28            | 0:22.01                         |
| 287       | T             | 28            | 0            | 28            | 0:22.10                         |
| 288       | T             | 28            | 0            | 28            | 0:22.09                         |
| 289       | T             | 28            | 0            | 28            | 0:21.98                         |
| 290       | T             | 28            | 0            | 28            | 0:21.97                         |
| 291       | T             | 28            | 0            | 28            | 0:22.14                         |
| 292       | T             | 28            | 0            | 28            | 0:22.21                         |
| 293       | T             | 28            | 0            | 28            | 0:22.09                         |
| 294       | T             | 28            | 0            | 28            | 0:22.17                         |
| 295       | T             | 28            | 0            | 28            | 0:22.20                         |
| 296       | T             | 28            | 0            | 28            | 0:22.22                         |
| 297       | T             | 28            | 0            | 28            | 0:22.07                         |
| 298       | T             | 28            | 0            | 28            | 0:22.06                         |
| 299       | T             | 28            | 0            | 28            | 0:22.10                         |
| 300       | T             | 28            | 0            | 28            | 0:22.15                         |
| 301       | T             | 28            | 0            | 28            | 0:22.04                         |
| 302       | T             | 28            | 0            | 28            | 0:22.00                         |
| 303       | T             | 28            | 0            | 28            | 0:22.24                         |
| 304       | T             | 28            | 0            | 28            | 0:22.28                         |
| 305       | T             | 28            | 0            | 28            | 0:22.30                         |
| 306       | T             | 28            | 0            | 28            | 0:22.10                         |
| 307       | T             | 28            | 0            | 28            | 0:22.07                         |
| 308       | T             | 28            | 0            | 28            | 0:22.12                         |
| 309       | T             | 28            | 0            | 28            | 0:22.15                         |
| 310       | T             | 28            | 0            | 28            | 0:22.14                         |
| 311       | T             | 28            | 0            | 28            | 0:21.96                         |
| 312       | T             | 28            | 0            | 28            | 0:22.13                         |
| 313       | T             | 28            | 0            | 28            | 0:21.95                         |
| 314       | T             | 28            | 0            | 28            | 0:22.41                         |

| <b>Id</b> | <b>Result</b> | <b>#total</b> | <b>#true</b> | <b>#false</b> | <b>Execution time (min:sec)</b> |
|-----------|---------------|---------------|--------------|---------------|---------------------------------|
| 315       | T             | 28            | 0            | 28            | 0:22.32                         |
| 316       | T             | 28            | 0            | 28            | 0:22.03                         |
| 317       | T             | 28            | 0            | 28            | 0:22.18                         |
| 318       | T             | 28            | 0            | 28            | 0:22.04                         |
| 319       | T             | 28            | 0            | 28            | 0:22.09                         |
| 320       | T             | 28            | 0            | 28            | 0:22.14                         |
| 321       | T             | 28            | 0            | 28            | 0:22.16                         |
| 322       | T             | 28            | 0            | 28            | 0:21.93                         |
| 323       | T             | 28            | 0            | 28            | 0:21.96                         |
| 324       | T             | 28            | 0            | 28            | 0:22.11                         |
| 325       | T             | 28            | 0            | 28            | 0:22.07                         |
| 326       | T             | 28            | 0            | 28            | 0:22.00                         |
| 327       | T             | 28            | 0            | 28            | 0:22.02                         |
| 328       | T             | 28            | 0            | 28            | 0:22.02                         |
| 329       | T             | 28            | 0            | 28            | 0:21.94                         |
| 330       | T             | 28            | 0            | 28            | 0:22.01                         |
| 331       | T             | 28            | 0            | 28            | 0:22.11                         |
| 332       | T             | 28            | 0            | 28            | 0:22.26                         |
| 333       | T             | 28            | 0            | 28            | 0:22.02                         |
| 334       | T             | 28            | 0            | 28            | 0:22.15                         |
| 335       | T             | 28            | 0            | 28            | 0:22.15                         |
| 336       | T             | 28            | 0            | 28            | 0:22.15                         |
| 337       | T             | 28            | 0            | 28            | 0:22.07                         |
| 338       | T             | 28            | 0            | 28            | 0:22.02                         |
| 339       | T             | 28            | 0            | 28            | 0:22.10                         |
| 340       | T             | 28            | 0            | 28            | 0:22.07                         |
| 341       | T             | 28            | 0            | 28            | 0:22.13                         |
| 342       | T             | 28            | 0            | 28            | 0:21.98                         |
| 343       | T             | 28            | 0            | 28            | 0:22.08                         |
| 344       | T             | 28            | 0            | 28            | 0:22.14                         |
| 345       | T             | 28            | 0            | 28            | 0:22.06                         |
| 346       | T             | 28            | 0            | 28            | 0:21.95                         |
| 347       | T             | 28            | 0            | 28            | 0:22.10                         |
| 348       | T             | 28            | 0            | 28            | 0:22.13                         |
| 349       | T             | 28            | 0            | 28            | 0:22.19                         |
| 350       | T             | 28            | 0            | 28            | 0:22.09                         |
| 351       | T             | 28            | 0            | 28            | 0:22.08                         |
| 352       | T             | 28            | 0            | 28            | 0:22.10                         |
| 353       | T             | 28            | 0            | 28            | 0:22.02                         |
| 354       | T             | 28            | 0            | 28            | 0:21.98                         |
| 355       | T             | 28            | 0            | 28            | 0:22.01                         |
| 356       | T             | 28            | 0            | 28            | 0:22.23                         |
| 357       | T             | 28            | 0            | 28            | 0:22.05                         |
| 358       | T             | 28            | 0            | 28            | 0:22.02                         |
| 359       | T             | 28            | 0            | 28            | 0:21.99                         |
| 360       | T             | 28            | 0            | 28            | 0:22.21                         |
| 361       | T             | 28            | 0            | 28            | 0:22.04                         |
| 362       | T             | 28            | 0            | 28            | 0:22.09                         |

| <b>Id</b> | <b>Result</b> | <b>#total</b> | <b>#true</b> | <b>#false</b> | <b>Execution time (min:sec)</b> |
|-----------|---------------|---------------|--------------|---------------|---------------------------------|
| 363       | T             | 28            | 0            | 28            | 0:22.03                         |
| 364       | T             | 28            | 0            | 28            | 0:22.12                         |
| 365       | T             | 28            | 0            | 28            | 0:22.11                         |
| 366       | T             | 28            | 0            | 28            | 0:22.07                         |
| 367       | T             | 28            | 0            | 28            | 0:22.07                         |
| 368       | T             | 28            | 0            | 28            | 0:22.05                         |
| 369       | T             | 28            | 0            | 28            | 0:22.07                         |
| 370       | T             | 28            | 0            | 28            | 0:22.02                         |
| 371       | T             | 28            | 0            | 28            | 0:22.17                         |
| 372       | T             | 28            | 0            | 28            | 0:21.97                         |
| 373       | T             | 28            | 0            | 28            | 0:22.00                         |
| 374       | T             | 28            | 0            | 28            | 0:22.12                         |
| 375       | T             | 28            | 0            | 28            | 0:22.08                         |
| 376       | T             | 28            | 0            | 28            | 0:22.05                         |
| 377       | T             | 28            | 0            | 28            | 0:22.04                         |
| 378       | T             | 28            | 0            | 28            | 0:21.90                         |
| 379       | T             | 28            | 0            | 28            | 0:22.02                         |
| 380       | T             | 28            | 0            | 28            | 0:21.97                         |
| 381       | T             | 28            | 0            | 28            | 0:22.09                         |
| 382       | T             | 28            | 0            | 28            | 0:22.21                         |
| 383       | T             | 28            | 0            | 28            | 0:22.00                         |
| 384       | T             | 28            | 0            | 28            | 0:22.22                         |
| 385       | T             | 28            | 0            | 28            | 0:21.96                         |
| 386       | T             | 28            | 0            | 28            | 0:22.18                         |
| 387       | T             | 28            | 0            | 28            | 0:21.96                         |
| 388       | T             | 28            | 0            | 28            | 0:22.01                         |
| 389       | T             | 28            | 0            | 28            | 0:22.05                         |
| 390       | T             | 28            | 0            | 28            | 0:22.03                         |
| 391       | T             | 28            | 0            | 28            | 0:22.14                         |
| 392       | T             | 28            | 0            | 28            | 0:21.84                         |
| 393       | T             | 28            | 0            | 28            | 0:22.22                         |
| 394       | T             | 28            | 0            | 28            | 0:21.99                         |
| 395       | T             | 28            | 0            | 28            | 0:22.10                         |
| 396       | T             | 28            | 0            | 28            | 0:22.05                         |
| 397       | T             | 28            | 0            | 28            | 0:22.05                         |
| 398       | T             | 28            | 0            | 28            | 0:22.17                         |
| 399       | T             | 28            | 0            | 28            | 0:22.29                         |
| 400       | T             | 28            | 0            | 28            | 0:22.06                         |
| 401       | T             | 28            | 0            | 28            | 0:22.10                         |
| 402       | T             | 28            | 0            | 28            | 0:22.08                         |
| 403       | T             | 28            | 0            | 28            | 0:22.07                         |
| 404       | T             | 28            | 0            | 28            | 0:22.07                         |
| 405       | T             | 28            | 0            | 28            | 0:22.19                         |
| 406       | T             | 28            | 0            | 28            | 0:21.99                         |
| 407       | T             | 28            | 0            | 28            | 0:22.13                         |
| 408       | T             | 28            | 0            | 28            | 0:22.16                         |
| 409       | T             | 28            | 0            | 28            | 0:22.01                         |
| 410       | T             | 28            | 0            | 28            | 0:22.13                         |

| <b>Id</b> | <b>Result</b> | <b>#total</b> | <b>#true</b> | <b>#false</b> | <b>Execution time (min:sec)</b> |
|-----------|---------------|---------------|--------------|---------------|---------------------------------|
| 411       | T             | 28            | 0            | 28            | 0:22.00                         |
| 412       | T             | 28            | 0            | 28            | 0:22.16                         |
| 413       | T             | 28            | 0            | 28            | 0:22.02                         |
| 414       | T             | 28            | 0            | 28            | 0:22.17                         |
| 415       | T             | 28            | 0            | 28            | 0:22.05                         |
| 416       | T             | 28            | 0            | 28            | 0:22.07                         |
| 417       | T             | 28            | 0            | 28            | 0:22.16                         |
| 418       | T             | 28            | 0            | 28            | 0:22.14                         |
| 419       | T             | 28            | 0            | 28            | 0:22.04                         |
| 420       | T             | 28            | 0            | 28            | 0:22.03                         |
| 421       | T             | 28            | 0            | 28            | 0:21.90                         |
| 422       | T             | 28            | 0            | 28            | 0:21.99                         |
| 423       | T             | 28            | 0            | 28            | 0:22.01                         |
| 424       | T             | 28            | 0            | 28            | 0:22.04                         |
| 425       | T             | 28            | 0            | 28            | 0:22.12                         |
| 426       | T             | 28            | 0            | 28            | 0:22.12                         |
| 427       | T             | 28            | 0            | 28            | 0:21.98                         |
| 428       | T             | 28            | 0            | 28            | 0:21.94                         |
| 429       | T             | 28            | 0            | 28            | 0:21.96                         |
| 430       | T             | 28            | 0            | 28            | 0:22.07                         |
| 431       | T             | 28            | 0            | 28            | 0:22.02                         |
| 432       | T             | 28            | 0            | 28            | 0:22.06                         |
| 433       | T             | 28            | 0            | 28            | 0:22.10                         |
| 434       | T             | 28            | 0            | 28            | 0:22.05                         |
| 435       | T             | 28            | 0            | 28            | 0:22.02                         |
| 436       | T             | 28            | 0            | 28            | 0:22.05                         |
| 437       | T             | 28            | 0            | 28            | 0:21.95                         |
| 438       | T             | 28            | 0            | 28            | 0:22.01                         |
| 439       | T             | 28            | 0            | 28            | 0:22.00                         |
| 440       | T             | 28            | 0            | 28            | 0:21.97                         |
| 441       | T             | 28            | 0            | 28            | 0:21.91                         |
| 442       | T             | 28            | 0            | 28            | 0:22.16                         |
| 443       | T             | 28            | 0            | 28            | 0:22.11                         |
| 444       | T             | 28            | 0            | 28            | 0:22.07                         |
| 445       | T             | 28            | 0            | 28            | 0:22.09                         |
| 446       | T             | 28            | 0            | 28            | 0:22.01                         |
| 447       | T             | 28            | 0            | 28            | 0:22.09                         |
| 448       | T             | 28            | 0            | 28            | 0:22.09                         |
| 449       | T             | 28            | 0            | 28            | 0:22.15                         |
| 450       | T             | 28            | 0            | 28            | 0:22.28                         |
| 451       | T             | 28            | 0            | 28            | 0:22.06                         |
| 452       | T             | 28            | 0            | 28            | 0:21.92                         |
| 453       | T             | 28            | 0            | 28            | 0:22.08                         |
| 454       | T             | 28            | 0            | 28            | 0:22.09                         |
| 455       | T             | 28            | 0            | 28            | 0:21.92                         |
| 456       | T             | 28            | 0            | 28            | 0:22.20                         |
| 457       | T             | 28            | 0            | 28            | 0:22.07                         |
| 458       | T             | 28            | 0            | 28            | 0:22.06                         |



| <b>Id</b> | <b>Result</b> | <b>#total</b> | <b>#true</b> | <b>#false</b> | <b>Execution time (min:sec)</b> |
|-----------|---------------|---------------|--------------|---------------|---------------------------------|
| 459       | T             | 28            | 0            | 28            | 0:22.01                         |
| 460       | T             | 28            | 0            | 28            | 0:21.81                         |
| 461       | T             | 28            | 0            | 28            | 0:22.04                         |
| 462       | T             | 28            | 0            | 28            | 0:22.01                         |
| 463       | T             | 28            | 0            | 28            | 0:22.12                         |
| 464       | T             | 28            | 0            | 28            | 0:22.02                         |
| 465       | T             | 28            | 0            | 28            | 0:22.07                         |
| 466       | T             | 28            | 0            | 28            | 0:22.19                         |
| 467       | T             | 28            | 0            | 28            | 0:22.03                         |
| 468       | T             | 28            | 0            | 28            | 0:22.11                         |
| 469       | T             | 28            | 0            | 28            | 0:22.02                         |
| 470       | T             | 28            | 0            | 28            | 0:22.03                         |
| 471       | T             | 28            | 0            | 28            | 0:22.07                         |
| 472       | T             | 28            | 0            | 28            | 0:21.93                         |
| 473       | T             | 28            | 0            | 28            | 0:21.86                         |
| 474       | T             | 28            | 0            | 28            | 0:22.27                         |
| 475       | T             | 28            | 0            | 28            | 0:22.16                         |
| 476       | T             | 28            | 0            | 28            | 0:22.06                         |
| 477       | T             | 28            | 0            | 28            | 0:22.10                         |
| 478       | T             | 28            | 0            | 28            | 0:22.07                         |
| 479       | T             | 28            | 0            | 28            | 0:22.00                         |
| 480       | T             | 28            | 0            | 28            | 0:22.11                         |
| 481       | T             | 28            | 0            | 28            | 0:22.12                         |
| 482       | T             | 28            | 0            | 28            | 0:22.02                         |
| 483       | T             | 28            | 0            | 28            | 0:21.87                         |
| 484       | T             | 28            | 0            | 28            | 0:22.07                         |
| 485       | T             | 28            | 0            | 28            | 0:22.16                         |
| 486       | T             | 28            | 0            | 28            | 0:22.13                         |
| 487       | T             | 28            | 0            | 28            | 0:21.98                         |
| 488       | T             | 28            | 0            | 28            | 0:22.04                         |
| 489       | T             | 28            | 0            | 28            | 0:22.08                         |
| 490       | T             | 28            | 0            | 28            | 0:22.11                         |
| 491       | T             | 28            | 0            | 28            | 0:22.07                         |
| 492       | T             | 28            | 0            | 28            | 0:22.07                         |
| 493       | T             | 28            | 0            | 28            | 0:22.05                         |
| 494       | T             | 28            | 0            | 28            | 0:22.02                         |
| 495       | T             | 28            | 0            | 28            | 0:22.36                         |
| 496       | T             | 28            | 0            | 28            | 0:22.02                         |
| 497       | T             | 28            | 0            | 28            | 0:22.12                         |
| 498       | T             | 28            | 0            | 28            | 0:21.99                         |
| 499       | T             | 28            | 0            | 28            | 0:22.01                         |
| 500       | T             | 28            | 0            | 28            | 0:22.03                         |
